# Supplementary material for: Catalytic asymmetric synthesis of 2,5-dihydrofurans using synergistic bifunctional Ag catalysis
Source: Royal Society of Chemistry journal article supplement (doi:10.1039/c9ob01903k), 2019-01-01
Supplement: c9ob01903k1.pdf [file c9ob01903k1.pdf]

## Supporting Information

### Catalytic Asymmetric Synthesis of 2,5-Dihydrofurans Using Synergistic Bifunctional Ag Catalysis

Taoda Shi,<sup>a,b</sup> Shenghan Teng,<sup>a</sup> Alavala Gopi Krishna Reddy,<sup>d</sup> Xin Guo,<sup>c</sup> Yueteng Zhang,<sup>b</sup> Kohlson T. Moore,<sup>b</sup> Thomas Buckley,<sup>b</sup> Damian J. Mason,<sup>b</sup> Wei Wang,<sup>b</sup> Eli Chapman,<sup>b\*</sup> and Wenhao Hu<sup>d\*</sup>

- a. Shanghai Engineering Research Center of Molecular Therapeutics and New Drug Development, School of Chemistry and Chemical Engineering, East China Normal University, Shanghai, China, 200062.
- b. College of Pharmacy, Department of Pharmacology and Toxicology, the University of Arizona, Tucson, Arizona 85721.
- c. School of Pharmaceutical Sciences, Wenzhou Medical University, Wenzhou, Zhejiang Province, China, 325035.
- d. School of Pharmaceutical Sciences, Sun Yat-sen University, Guangzhou, China, 510006.

## Table of contents

|                                                                          |               |
|--------------------------------------------------------------------------|---------------|
| <b>A. General information</b>                                            | <b>3</b>      |
| <b>B. Preparation of substrates</b>                                      | <b>3</b>      |
| <b>C. Primarily screening with [Pd(allyl)Cl]<sub>2</sub> as catalyst</b> | <b>3-4</b>    |
| <b>D. Synthesis and characterization of 2,5-dihydrofurans</b>            | <b>5-19</b>   |
| <b>E. Mechanistic experiments</b>                                        | <b>21-26</b>  |
| <b>F. Derivatization of enantiopure 2,5-dihydrofuran 3k</b>              | <b>27</b>     |
| <b>G. References</b>                                                     | <b>28</b>     |
| <b>H. NMR spectra</b>                                                    | <b>29-77</b>  |
| <b>I. HPLC</b>                                                           | <b>78-136</b> |
| <b>J. Structural determination of 7k by X-ray</b>                        | <b>137</b>    |

## A. General information

All reactions were carried out under nitrogen atmosphere with magnetic stirring. Anhydrous DCM was purified by distillation over calcium hydride after elimination of alcohol stabilizer. Powdered 4Å molecular sieves were dried in a Muffle furnace at 400°C for 5 h prior to use. All other commercially obtained reagents were used as received unless specifically indicated. Flash column chromatography was performed over H silica gel purchased from Qindao Haiyang Chemical Co., China or Agela Technologies USA.

All  $^1\text{H}$  NMR and  $^{13}\text{C}$  NMR spectra were recorded using a Bruker-400 MHz and Bruker-500 MHz spectrometer in  $\text{CDCl}_3$  unless otherwise noted. Residue solvent peaks were chosen as an internal standard ( $^1\text{H}$  NMR:  $\text{CDCl}_3$  at 7.26 ppm,  $^{13}\text{C}$  NMR:  $\text{CDCl}_3$  at 77.0 ppm). Data of  $^1\text{H}$  NMR spectra were reported as follows: chemical shift, integration, multiplicity. (s = singlet, d = doublet, t = triplet, q = quartet, m = multiplet, br = broad). HRMS (ESI) were recorded on IonSpec FT-ICR mass spectrometer. HPLC analyses was performed on Dalian Elite (UV230+ UV/Vis Detector and P230P High Pressure Pump) and Agilent 1100. Chiralpak IA column was purchased from Daicel Chemical Industries, LTD. Single crystal X-ray diffraction data (**7k**) were recorded on Bruker-AXS SMART APEX II single crystal X-ray diffractometer.

## B. Preparation of substrates

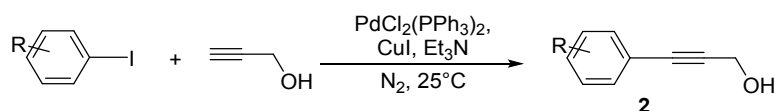

### Scheme S1. preparation of aryl propargyl alcohol

**General procedure for the synthesis of aryl propargyl alcohols:** All aryl propargyl alcohols were prepared using reported procedures.<sup>1</sup>  $\text{Pd}(\text{PPh}_3)_2\text{Cl}_2$  (0.05 mmol, 0.01 equiv) and  $\text{CuI}$  (0.5 mmol, 0.1 equiv) were added to the flask. To this mixture were added iodoarene (5 mmol, 1 equiv) and  $\text{Et}_3\text{N}$  (10 mL) under nitrogen atmosphere. After 10 minutes, the propargyl alcohol (5.5 mmol, 1.1 equiv) was injected into the mixture. After stirring at 25°C for 10 hours, the solution was then quenched by aqueous  $\text{NH}_4\text{Cl}$ , and extracted with  $\text{Et}_2\text{O}$  3 times. The combined organic phase was washed with 1M  $\text{HCl}$  and brine and dried with anhydrous  $\text{Na}_2\text{SO}_4$ . After filtration, the solvent was removed to give the crude product, which was then purified by flash chromatography on silica gel (PE/EA = 10:1~5:1) to give the pure product.

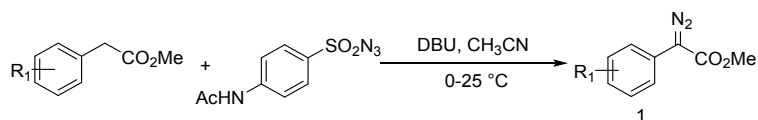

### Scheme S2. preparation of methyl aryldiazoacetates

**General procedure for the synthesis of diazoacetates:** All the diazoacetates were prepared by reported procedures.<sup>2</sup> Methyl arylacetates (10 mmol, 1.0 equiv) and *p*-ABSA (11 mmol, 1.1equiv) was dissolved in a 100 mL flask with 40 mL  $\text{CH}_3\text{CN}$ . After stirring for 10 min in an ice bath,  $\text{DBU}$  (1.1 mmol, 1.1 equiv) in 20 mL of  $\text{CH}_3\text{CN}$  was added dropwise. After stirring for 12 hours at 25°C, the reaction mixture was quenched with saturated aqueous  $\text{NH}_4\text{Cl}$  at 0°C. The mixture was then extracted with diethyl ether 3 times. The combined organic phase was washed with 60 mL brine and dried with anhydrous  $\text{Na}_2\text{SO}_4$ . After

filtration, the solvent was removed to give the crude product. It was then purified by flash chromatography on silica gel with petroleum ether to give the pure product.

### C. Preliminary screening with $[Pd(allyl)Cl]_2$ as catalyst

**General procedure for evaluation of ligands of  $[Pd(allyl)Cl]_2$  in formal [4+1] cycloaddition of diazoacetates and propargyl alcohol:** The mixture of 100 mg 4Å MS,  $[Pd(allyl)Cl]_2$  (0.01 mmol, 0.1 equiv) and ligand (0.02 mmol, 0.1 equiv) was dissolved in 0.5 mL of anhydrous dichloromethane at 25°C. The reaction mixture was stirred for 2 h. Then aryl propargyl alcohol **2** (0.1 mmol) dissolved in 1 mL of anhydrous dichloromethane was added. After stirring for five minutes, diazoacetate **1** (0.15 mmol, 1.5 equiv) dissolved in 4 mL anhydrous dichloromethane was added via a syringe pump over 1 h. After stirring for 24 h, the 4Å MS were filtered and the solvent was removed to give the crude product. The crude product was then purified by microgram scale preparative TLC (PE/EA = 40:1-20:1) to give the pure product for chiral HPLC analysis. All the ligands presented in Table S1 showed minimal enantioselectivity.

**Table S1. Evaluation of ligands of  $[Pd(allyl)Cl]_2$  in formal [4+1] cycloaddition of diazoacetates and propargyl alcohol.<sup>a</sup>**

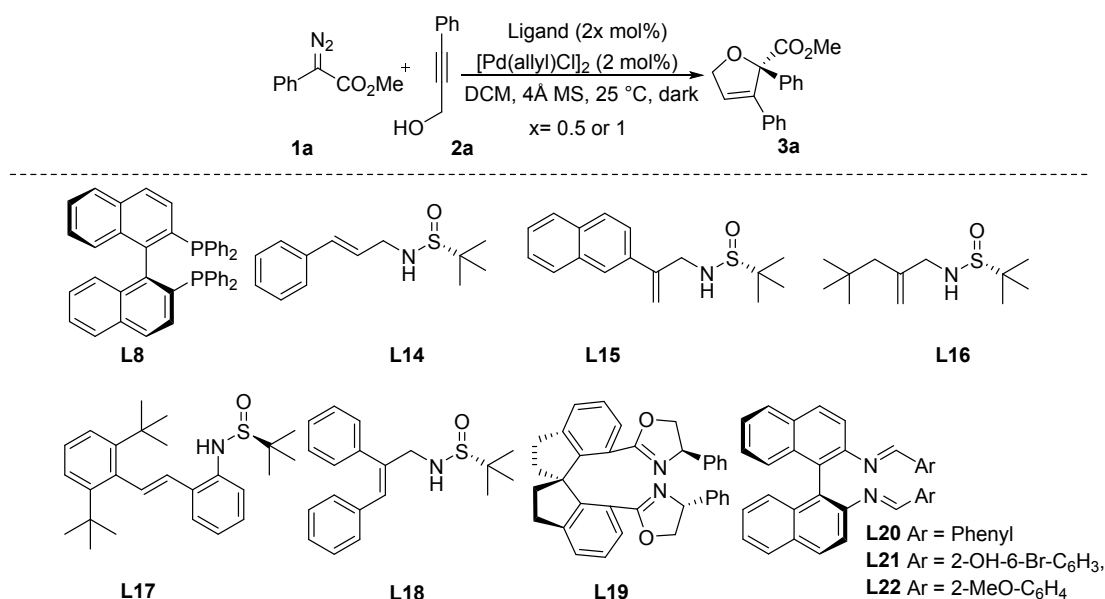

| Entry | L   | M:L | con. <sup>b</sup> (%) | ee <sup>c</sup> of <b>3a</b> (%) |
|-------|-----|-----|-----------------------|----------------------------------|
| 1     | L8  | 2:1 | >90                   | 54                               |
| 2     | L14 | 1:1 | >90                   | 0                                |
| 3     | L15 | 1:1 | >90                   | 0                                |
| 4     | L16 | 1:1 | >90                   | 0                                |
| 5     | L17 | 1:1 | >90                   | 0                                |
| 6     | L18 | 1:1 | >90                   | 0                                |
| 7     | L19 | 1:1 | >90                   | 0                                |
| 8     | L20 | 1:1 | >90                   | 0                                |

|           |            |     |     |   |
|-----------|------------|-----|-----|---|
| <b>9</b>  | <b>L21</b> | 1:1 | >90 | 0 |
| <b>10</b> | <b>L22</b> | 1:1 | >90 | 0 |

<sup>a</sup>Reaction conditions: **1a** (0.1 mmol) in DCM (1.0 mL) was added to a solution of **2a** (0.15 mmol, 1.0 equiv), [Pd(allyl)Cl]<sub>2</sub> (0.002 mmol, 0.02 equiv), 100 mg 4Å MS and **L** (0.002 or 0.001 mmol, 0.002 or 0.001 equiv) in 1.0 mL of DCM, 25°C. <sup>b</sup>Determined by <sup>1</sup>H NMR of the reaction mixture. <sup>c</sup>Determined by chiral HPLC analysis.

#### D. Synthesis and characterization of 2,5-dihydrofurans

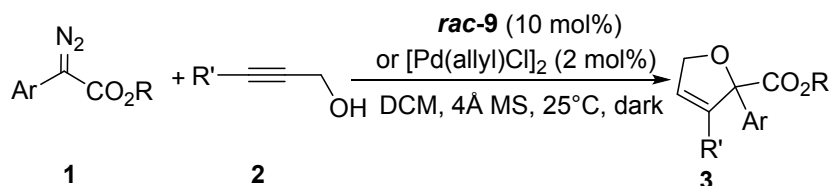

**Scheme S3 preparation of *rac*-3**

**General procedure for the synthesis of racemic 2,5-dihydrofuran:** A mixture of 200 mg 4Å MS, AgSbF<sub>6</sub> (0.04 mmol, 0.2 equiv) and *rac*-BINAP (0.02 mmol, 0.1 equiv) or [Pd(allyl)Cl]<sub>2</sub> (0.002 mmol, 0.02 equiv) was dissolved in 1 mL of anhydrous dichloromethane at 25°C. The reaction mixture was stirred for 2 h. Then aryl propargyl alcohol **2** (0.2 mmol) dissolved in 1 mL of anhydrous dichloromethane was added. After stirring for five minutes, diazoacetate **1** (0.3 mmol, 1.5 equiv) dissolved in 4 mL anhydrous dichloromethane was added via a syringe pump over 1 h. After stirring for 24 h, 4Å MS were filtered and the solvent was removed to give the crude product. The crude product was then purified by flash chromatography on silica gel (PE/EA = 40:1~20:1) to give the pure product.

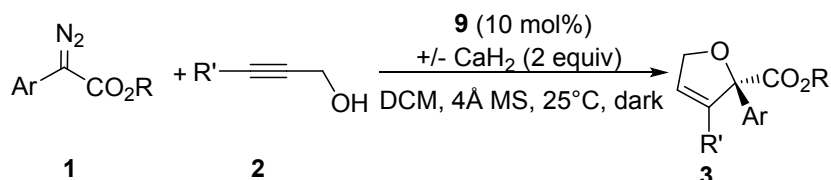

**Scheme S4. preparation of (S)-3**

**General procedure for the synthesis of (S)-3 with optimal conditions from first-round screening:** The glassware was wrapped with aluminum foil to protect silver catalyst from light. The mixture of 200 mg 4Å MS, AgSbF<sub>6</sub> (0.04 mmol, 0.2 equiv) and (*R*)-3,5-DM-BINAP (0.02 mmol, 0.1 equiv) was dissolved in 1 mL of anhydrous dichloromethane at 25°C. The reaction mixture was stirred for 2 h. Then aryl propargyl alcohol **2** (0.2 mmol) dissolved in 1 mL of anhydrous dichloromethane was added. After stirring for 1 h, diazoacetate **1** (0.3 mmol, 1.5 equiv) dissolved in 4 mL anhydrous dichloromethane was added via a syringe pump over 1 h. After stirring for 48 h, 4Å MS were filtered and the solvent was removed to give the crude product. The crude product was then purified by flash chromatography on silica gel (PE/EA = 40:1~20:1) to give the pure product.

**General procedure for the synthesis of (S)-3 with optimal conditions from second-round screening:** The glassware was dried with heat gun under vacuum and cooled down in an Argon atmosphere. Then it was wrapped with aluminum foil to protect silver catalyst from light. **1** (0.2 mmol, 1 equiv) in DCM (2 mL) was added to the mixture of **2** (0.4 mmol, 2

equiv),  $\text{CaH}_2$  (0.4 mmol, 2 equiv), 200 mg Å MS,  $\text{AgSbF}_6$  (0.04 mmol, 0.2 equiv), (*R*)-3,5-DM-BINAP (0.02 mmol, 0.1 equiv) and 2 mL DCM, via a syringe pump over 1 h. After stirring for 48 h, 4Å MS and catalyst were filtered off and the solvent was removed to give the crude product. The crude product was then purified by flash chromatography on silica gel (PE/EA = 40:1~20:1) to give the pure product.

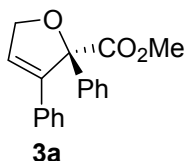

**3a**: colorless liquid, yield 54%, 78% ee, determined by HPLC (Daicel Chirapak IA, flow rate: 1.0 mL/min, hexane/isopropanol = 50:1; 254 nm; retention time:  $t_{\text{major}} = 11.28$  min,  $t_{\text{minor}} = 20.70$  min);  $^1\text{H}$  NMR(400 MHz,  $\text{CDCl}_3$ ):  $\delta$  7.35 – 7.20 (m, 10H), 6.47 (t,  $J = 2.0$  Hz, 1H), 4.99 (dd,  $J_1 = 5.2$  Hz,  $J_2 = 2.0$  Hz, 1H), 4.93 (dd,  $J_1 = 5.2$  Hz,  $J_2 = 2.0$  Hz, 1H), 3.78 (s, 3H).  $^{13}\text{C}$  NMR(100 MHz,  $\text{CDCl}_3$ ): 172.0, 141.2, 139.4, 132.6, 128.3, 128.2, 128.0, 127.9, 127.4, 126.8, 94.8, 74.8, 52.5. HRMS: calcd 303.0997 for  $\text{C}_{18}\text{H}_{16}\text{O}_3\text{Na}$   $[\text{M}+\text{Na}]^+$ , found 303.1002.

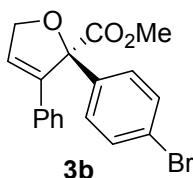

**3b**: colorless liquid, yield 46%, 87% ee, determined by HPLC (Daicel Chirapak IA, flow rate: 1.0 mL/min, hexane/isopropanol = 50:1; 254 nm; retention time:  $t_{\text{major}} = 14.60$  min,  $t_{\text{minor}} = 20.55$  min);  $^1\text{H}$  NMR (400 MHz,  $\text{CDCl}_3$ ):  $\delta$  7.44 (d,  $J = 8.8$  Hz, 2H), 7.26 – 7.24 (m, 7H), 6.47 (t,  $J = 2.0$  Hz, 1H), 4.96 (dd,  $J_1 = 5.2$  Hz,  $J_2 = 2.0$  Hz, 1H), 4.92 (dd,  $J_1 = 5.2$  Hz,  $J_2 = 2.0$  Hz, 1H), 3.78 (s, 3H).  $^{13}\text{C}$  NMR(100 MHz,  $\text{CDCl}_3$ ): 171.7, 141.0, 138.4, 132.3, 131.3, 129.2, 128.2, 128.1, 127.8, 127.1, 122.5, 94.1, 75.0, 52.7. HRMS: calcd 381.0102 for  $\text{C}_{18}\text{H}_{15}\text{O}_3\text{BrNa}$   $[\text{M}+\text{Na}]^+$ , found 381.0083.

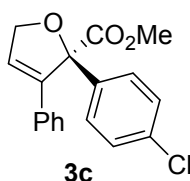

**3c**: colorless liquid, yield 42%, 88% ee, determined by HPLC (Daicel Chirapak IA, flow rate: 1.0 mL/min, hexane/isopropanol = 60:1; 254 nm; retention time:  $t_{\text{major}} = 14.57$  min,  $t_{\text{minor}} = 21.40$  min);  $^1\text{H}$  NMR(400 MHz,  $\text{CDCl}_3$ ):  $\delta$  7.29 (d,  $J = 3.6$  Hz, 4H), 7.23 (s, 5H), 6.47 (t,  $J = 1.8$  Hz, 1H), 4.99 (dd,  $J_1 = 5.2$  Hz,  $J_2 = 2.0$  Hz, 1H), 4.92 (dd,  $J_1 = 5.2$  Hz,  $J_2 = 2.0$  Hz, 1H), 3.78 (s, 3H).  $^{13}\text{C}$  NMR(100 MHz,  $\text{CDCl}_3$ ): 171.74, 140.98, 137.85, 134.25, 132.29, 128.89, 128.38, 128.17, 128.11, 127.82, 127.04, 94.09, 75.00, 52.72. HRMS: calcd 337.0607 for  $\text{C}_{18}\text{H}_{15}\text{O}_3\text{ClNa}$   $[\text{M}+\text{Na}]^+$ , found 337.0608.

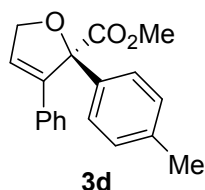

**3d:** colorless liquid, yield 36%, 76% ee, determined by HPLC (Daicel Chirapak IA, flow rate: 1.0 mL/min, hexane/isopropanol = 50:1; 254 nm; retention time:  $t_{\text{major}} = 15.09$  min,  $t_{\text{minor}} = 32.97$  min);  $^1\text{H NMR}$ (400 MHz,  $\text{CDCl}_3$ ):  $\delta$ 7.28 (dd,  $J = 6.8, 3.0$  Hz, 2H), 7.25 (s, 1H), 7.22 (dd,  $J_1 = 6.6$  Hz,  $J_2 = 4.2$  Hz, 4H), 7.13 (d,  $J = 8.1$  Hz, 2H), 6.49 (t,  $J = 1.8$  Hz, 1H), 4.95 (dd,  $J_1 = 8.6$  Hz,  $J_2 = 1.8$  Hz, 1H), 4.93 (dd,  $J_1 = 8.6$  Hz,  $J_2 = 1.8$  Hz, 1H), 3.77 (s, 3H), 2.33 (s, 3H).  $^{13}\text{C NMR}$ (100 MHz,  $\text{CDCl}_3$ ): 172.18, 141.07, 138.16, 136.42, 132.64, 129.56, 128.98, 127.99, 127.85, 127.32, 126.79, 94.64, 74.66, 52.52, 21.16. HRMS: calcd 317.1154 for  $\text{C}_{19}\text{H}_{18}\text{O}_3\text{Na}$   $[\text{M}+\text{Na}]^+$ , found 317.1163.

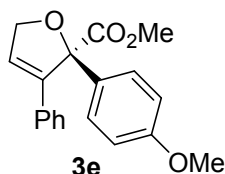

**3e:** colorless liquid, yield 42%, 71% ee, determined by HPLC (Daicel Chirapak IA, flow rate: 1.0 mL/min, hexane/isopropanol = 25:1; 254 nm; retention time:  $t_{\text{major}} = 18.97$  min,  $t_{\text{minor}} = 42.16$  min);  $^1\text{H NMR}$ (400 MHz,  $\text{CDCl}_3$ ):  $\delta$ 7.20 – 7.14 (m, 6H), 6.85-6.38 (m, 3H), 6.38 (t,  $J = 2.0$  Hz, 1H), 4.91 (dd,  $J_1 = 14.0$  Hz,  $J_2 = 2.0$  Hz, 1H), 4.86 (dd,  $J_1 = 14.0$  Hz,  $J_2 = 2.0$  Hz, 1H), 3.70 (s, 3H), 3.66 (s, 3H).  $^{13}\text{C NMR}$ (100 MHz,  $\text{CDCl}_3$ ): 171.9, 159.4, 141.3, 140.8, 132.7, 128.0, 127.9, 126.9, 119.7, 113.8, 113.2, 94.7, 74.8, 55.2, 52.6. HRMS: calcd 333.1103 for  $\text{C}_{19}\text{H}_{18}\text{O}_4\text{Na}$   $[\text{M}+\text{Na}]^+$ , found 333.1114.

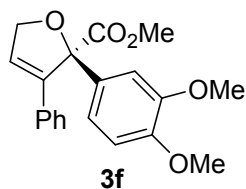

**3f:** colorless liquid, yield 36%, 69% ee, determined by HPLC (Daicel Chirapak IA, flow rate: 1.0 mL/min, hexane/isopropanol = 25:1; 254 nm; retention time:  $t_{\text{major}} = 35.53$  min,  $t_{\text{minor}} = 40.26$  min);  $^1\text{H NMR}$ (400 MHz,  $\text{CDCl}_3$ ):  $\delta$ 7.24 – 6.79 (m, 8H), 6.46 (t,  $J = 2.0$  Hz, 1H), 4.98 (dd,  $J_1 = 14.0$  Hz,  $J_2 = 2.0$  Hz, 1H), 4.92 (dd,  $J_1 = 14.0$  Hz,  $J_2 = 2.0$  Hz, 1H), 3.86 (s, 3H), 3.78 (s, 3H), 3.74 (s, 3H).  $^{13}\text{C NMR}$ (100 MHz,  $\text{CDCl}_3$ ): 172.2, 149.0, 148.6, 141.3, 132.8, 131.8, 128.0, 127.9, 127.8, 126.8, 119.9, 110.9, 110.6, 94.5, 74.6, 55.8, 55.7, 52.5. HRMS: calcd 363.1208 for  $\text{C}_{20}\text{H}_{20}\text{O}_5\text{Na}$   $[\text{M}+\text{Na}]^+$ , found 363.1217.

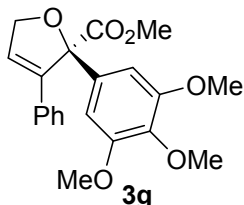

**3g:** colorless liquid, yield 50%, 79% ee, determined by HPLC (Daicel Chirapak IA, flow rate: 1.0 mL/min, hexane/isopropanol = 15:1; 254 nm; retention time:  $t_{\text{major}} = 36.31$  min,  $t_{\text{minor}} = 24.36$  min);  $^1\text{H NMR}$ (400 MHz,  $\text{CDCl}_3$ ):  $\delta$  7.28 – 7.25 (m, 5H), 6.57 (s, 2H), 6.41 (t,  $J = 1.6$  Hz, 1H), 5.00 (dd,  $J_1 = 13.8$  Hz,  $J_2 = 1.6$  Hz, 1H), 4.92 (dd,  $J_1 = 13.8$  Hz,  $J_2 = 1.6$  Hz, 1H), 3.83 (s, 3H), 3.79 (s, 3H), 3.70 (s, 6H).  $^{13}\text{C NMR}$ (100 MHz,  $\text{CDCl}_3$ ): 172.0, 152.8, 141.4, 137.9, 134.5,

132.9, 128.2, 128.0, 127.9, 127.1, 104.7, 94.5, 74.9, 60.8, 56.0, 52.6. HRMS: calcd 393.1314 for  $C_{21}H_{22}O_6Na$   $[M+Na]^+$ , found 393.1328.

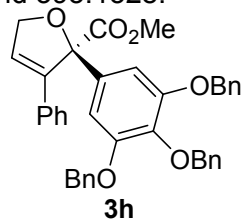

**3h**: colorless liquid, yield 24%, 68% ee, determined by HPLC (Daicel Chirapak IA, flow rate: 1.0 mL/min, hexane/isopropanol = 6:1; 254 nm; retention time:  $t_{major}$  = 75.17 min,  $t_{minor}$  = 44.61 min);  $^1H$  NMR(400 MHz,  $CDCl_3$ ):  $\delta$ 7.43 – 7.27 (m, 16H), 7.19 (dd,  $J$  = 10.9, 8.0 Hz, 4H), 6.64 (s, 2H), 6.34 (s, 1H), 5.04 (s, 2H), 4.93 (d,  $J$  = 4.4 Hz, 4H), 4.87 (d,  $J$  = 1.4 Hz, 2H), 3.69 (s, 3H).  $^{13}C$  NMR(100 MHz,  $CDCl_3$ ): 171.78, 152.44, 141.57, 138.36, 137.85, 137.06, 134.60, 132.90, 128.53, 128.41, 128.17, 128.11, 127.99, 127.95, 127.79, 127.76, 127.46, 126.76, 107.32, 94.51, 75.10, 74.78, 71.21, 58.42, 52.55. HRMS: calcd 621.2253 for  $C_{39}H_{34}O_6Na$   $[M+Na]^+$ , found 621.2240.

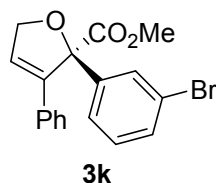

**3k**: colorless liquid, yield 56%, 88% ee, determined by HPLC (Daicel Chirapak IA, flow rate: 1.0 mL/min, hexane/isopropanol = 50:1; 254 nm; retention time:  $t_{major}$  = 10.87 min,  $t_{minor}$  = 14.84 min);  $^1H$  NMR(400 MHz,  $CDCl_3$ ):  $\delta$ 7.55 (s, 1H), 7.44 (d,  $J$  = 7.9 Hz, 1H), 7.29 – 7.20 (m, 6H), 7.17 (t,  $J$  = 7.9 Hz, 1H), 6.47 (d,  $J$  = 1.6 Hz, 1H), 5.00 (dd,  $J_1$  = 13.9 Hz,  $J_2$  = 1.7 Hz, 1H), 4.95 (dd,  $J_1$  = 13.9 Hz,  $J_2$  = 1.7 Hz, 1H), 3.79 (s, 3H).  $^{13}C$  NMR(100 MHz,  $CDCl_3$ ): 171.49, 141.56, 140.94, 132.23, 131.43, 130.46, 129.68, 128.16, 127.89, 127.16, 126.05, 122.38, 94.08, 75.10, 52.78. HRMS: calcd 381.0102 for  $C_{18}H_{15}O_3BrNa$   $[M+Na]^+$ , found 381.0102.

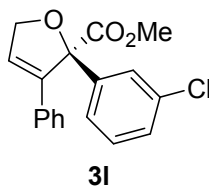

**3l**: colorless liquid, yield 47%, 88% ee, determined by HPLC (Daicel Chirapak IA, flow rate: 1.0 mL/min, hexane/isopropanol = 50:1; 254 nm; retention time:  $t_{major}$  = 10.84 min,  $t_{minor}$  = 14.89 min);  $^1H$  NMR(400 MHz,  $CDCl_3$ ):  $\delta$ 7.39 (s, 1H), 7.29 – 7.22 (m, 8H), 6.45 (t,  $J$  = 2 Hz, 1H), 4.99 (dd,  $J_1$  = 13.6 Hz,  $J_2$  = 1.6 Hz, 1H), 4.93 (dd,  $J_1$  = 13.6 Hz,  $J_2$  = 1.6 Hz, 1H), 3.78 (s, 3H).  $^{13}C$  NMR(100 MHz,  $CDCl_3$ ): 171.5, 141.3, 141.0, 134.2, 132.3, 129.3, 128.4, 128.1, 128.0, 127.9, 127.6, 127.1, 125.6, 94.1, 75.0, 52.7. HRMS: calcd 337.0607 for  $C_{18}H_{15}ClO_3Na$   $[M+Na]^+$ , found 337.0616.

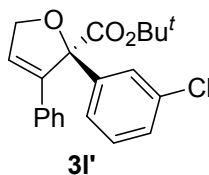



**3l'**: colorless liquid, yield 31%, 55% ee, determined by HPLC (Daicel Chirapak IA, flow rate: 1.0 mL/min, hexane/isopropanol = 18:1; 254 nm; retention time:  $t_{\text{major}} = 5.28$  min,  $t_{\text{minor}} = 6.16$  min);  $^1\text{H NMR}$ (400 MHz,  $\text{CDCl}_3$ ):  $\delta$  7.42 (s, 1H), 7.32 – 7.17 (m, 8H), 6.46 (s, 1H), 4.96 (d,  $J = 13.8$  Hz, 1H), 4.90 (d,  $J = 13.8$  Hz, 1H), 1.35 (s, 9H).  $^{13}\text{C NMR}$ (100 MHz,  $\text{CDCl}_3$ ): 169.7, 141.8, 141.1, 134.1, 132.8, 129.3, 128.3, 128.0, 127.9, 127.2, 125.8, 94.4, 82.6, 74.9, 27.8.

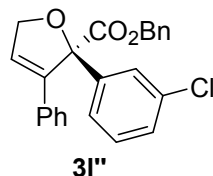

**3l''**: pale yellow liquid, yield 28%, 81% ee, determined by HPLC (Daicel Chirapak IA, flow rate: 1.0 mL/min, hexane/isopropanol = 18:1; 254 nm; retention time:  $t_{\text{major}} = 9.61$  min,  $t_{\text{minor}} = 14.78$  min);  $^1\text{H NMR}$ (400 MHz,  $\text{CDCl}_3$ ):  $\delta$  7.38 (s, 1H), 7.35 – 7.24 (m, 4H), 7.24 – 7.12 (m, 9H), 6.46 (s, 1H), 5.23 (d,  $J = 13.2$  Hz, 1H), 5.20 (d,  $J = 13.2$  Hz, 1H), 4.98 (d,  $J = 13.5$  Hz, 1H), 4.93 (d,  $J = 13.5$  Hz, 1H).  $^{13}\text{C NMR}$ (100 MHz,  $\text{CDCl}_3$ ): 170.7, 141.3, 140.8, 135.2, 134.1, 132.2, 129.3, 128.4, 128.2, 128.1, 128.0, 127.8, 127.7, 127.3, 125.6, 94.1, 75.1, 67.3.

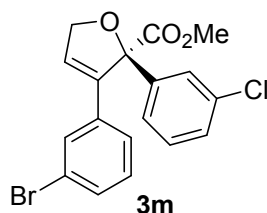

**3m**: colorless liquid, yield 44%; 81% ee, determined by HPLC (Daicel Chirapak IA, flow rate: 1.0 mL/min; hexane / isopropanol = 50 : 1; 254 nm; Retention time:  $t_{\text{major}} = 11.22$  min,  $t_{\text{minor}} = 15.34$  min);  $^1\text{H NMR}$ (400 MHz,  $\text{CDCl}_3$ ):  $\delta$  7.43 (t,  $J = 4.2$  Hz, 1H), 7.38 (s, 2H), 7.36 – 7.27 (m, 2H), 7.22 – 7.17 (m, 1H), 7.08 (s, 2H), 6.48 (t,  $J = 1.9$  Hz, 1H),  $^1\text{H NMR}$  (500 MHz, Chloroform-d)  $\delta$  7.48 – 7.43 (m, 1H), 7.40 (dq,  $J = 5.7, 2.0$  Hz, 2H), 7.36 – 7.25 (m, 3H), 7.22 (ddd,  $J = 7.7, 1.8, 1.2$  Hz, 1H), 7.15 – 7.06 (m, 2H), 6.50 (t,  $J = 1.9$  Hz, 1H), 5.02 (dd,  $J_1 = 14.2$  Hz,  $J_2 = 2.0$  Hz, 1H), 4.98 (dd,  $J_1 = 14.2$  Hz,  $J_2 = 2.0$  Hz, 1H), 3.83 (s, 3H), 3.81 (s, 3H);  $^{13}\text{C NMR}$  (100 MHz,  $\text{CDCl}_3$ ): 171.25, 140.95, 139.90, 134.39, 131.11, 130.91, 129.61, 129.53, 128.73, 128.42, 127.42, 126.57, 125.36, 109.76, 109.29, 94.08, 75.00, 52.85. HRMS: calcd  $\text{C}_{20}\text{H}_{19}\text{O}_3\text{NaCl}[\text{M}+\text{Na}]^+$  for 365.0920, found 365.0907.

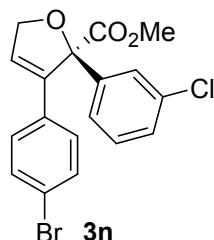

**3n**: colorless liquid, yield 49%; 80% ee, determined by HPLC (Daicel Chirapak IA, flow rate: 1.0 mL/min; hexane / isopropanol = 50 : 1; 254 nm; Retention time:  $t_{\text{major}} = 13.29$  min,  $t_{\text{minor}} = 16.83$  min);  $^1\text{H NMR}$ (400 MHz,  $\text{CDCl}_3$ ):  $\delta$  7.40 – 7.33 (m, 3H), 7.32 – 7.28 (m, 1H), 7.24 – 7.14 (m, 2H), 7.10 (d,  $J = 8.6$  Hz, 2H), 6.49 (t,  $J = 1.8$  Hz, 1H), 5.00 (dd,  $J_1 = 14.1$  Hz,  $J_2 = 1.9$  Hz, 1H), 4.96 (dd,  $J_1 = 14.1$  Hz,  $J_2 = 2.0$  Hz, 1H), 3.79 (s, 3H);  $^{13}\text{C NMR}$  (100 MHz,  $\text{CDCl}_3$ ): 171.35, 141.02, 139.98, 135.59, 134.40, 131.31, 129.56, 129.50, 128.73, 127.78,

127.49, 125.45, 122.36, 94.08, 75.03, 52.82. HRMS: calcd  $C_{18}H_{14}O_3NaClBr[M+Na]^+$  for 414.9713, found 414.9724.

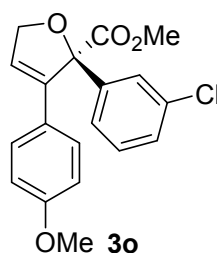

**3o**: colorless liquid, yield 62%; 82% ee, determined by HPLC (Daicel Chirapak IA, flow rate: 1.0 mL/min; hexane / isopropanol = 10 : 1; 254 nm; Retention time:  $t_{major}$  = 8.42 min,  $t_{minor}$  = 11.95 min);  $^1H$  NMR(400 MHz,  $CDCl_3$ ): $\delta$ 7.39 (d,  $J$  = 1.1 Hz, 1H), 7.29 (ddd,  $J$  = 4.5, 3.5, 1.8 Hz, 1H), 7.25 – 7.21 (m, 2H), 7.19 (d,  $J$  = 8.9 Hz, 2H), 6.76 (d,  $J$  = 8.9 Hz, 2H), 6.39 (s, 1H), 4.95 (dd,  $J_1$  = 13.7 Hz,  $J_2$  = 1.9 Hz, 1H), 4.93 (dd,  $J_1$  = 13.7 Hz,  $J_2$  = 1.9 Hz, 1H), 3.79 (s, 3H), 3.77 (s, 3H);  $^{13}C$  NMR(100 MHz,  $CDCl_3$ ):171.64, 159.34, 141.45, 140.20, 134.20, 129.42, 129.13, 128.49, 127.70, 125.69, 125.31, 124.58, 113.56, 94.10, 75.05, 55.20, 52.75. HRMS: calcd 367.0713 for  $C_{19}H_{17}O_4NaCl[M+Na]^+$ , found 367.0706.

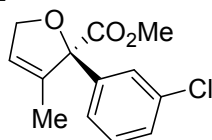

**3p**: colorless liquid, yield 53%, 49% ee, determined by HPLC (Daicel Chirapak IA, flow rate: 1.0 mL/min, hexane/isopropanol = 18:1; 254 nm; retention time:  $t_{major}$  = 6.05 min,  $t_{minor}$  = 6.80 min);  $^1H$  NMR(400 MHz,  $CDCl_3$ ): $\delta$ 7.42 (s, 1H), 7.35–7.26 (m, 3H), 5.77 (d,  $J$  = 1.4 Hz, 1H), 4.83 (dd,  $J_1$  = 13.7 Hz,  $J_2$  = 1.9 Hz, 1H), 4.81 (dd,  $J_1$  = 13.7 Hz,  $J_2$  = 1.9 Hz, 1H), 3.82 (s, 3H), 1.82 (d,  $J$  = 1.4 Hz, 3H).  $^{13}C$  NMR(100 MHz,  $CDCl_3$ ): 171.4, 141.4, 137.4, 134.4, 129.5, 128.3, 126.3, 124.2, 124.1, 94.3, 74.8, 52.6, 13.0. HRMS: calcd 276.0553 for  $C_{13}H_{13}ClO_3Na[M+Na]^+$ , found 276.0542.

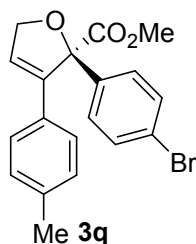

**3q**: colorless liquid, yield 64%; 92% ee, determined by HPLC (Daicel Chirapak IA, flow rate: 1.0 mL/min; hexane / isopropanol = 50 : 1; 254 nm; Retention time:  $t_{major}$  = 11.80 min,  $t_{minor}$  = 14.97min);  $^1H$  NMR(400 MHz,  $CDCl_3$ ): $\delta$ 7.46 (d,  $J$  = 7.8 Hz, 2H), 7.28 (s, 2H), 7.16 (d,  $J$  = 7.6 Hz, 2H), 7.06 (d,  $J$  = 7.9 Hz, 2H), 6.46 (t,  $J$  = 1.9 Hz, 1H), 4.97 (dd,  $J_1$  = 8.9 Hz,  $J_2$  = 1.9 Hz, 1H), 4.95 (dd,  $J_1$  = 8.9 Hz,  $J_2$  = 1.9 Hz, 1H), 3.80 (s, 3H), 2.33 (s, 3H).;  $^{13}C$  NMR(100 MHz,  $CDCl_3$ ): 171.77, 140.68, 138.45, 138.05, 131.85, 131.31, 129.26, 128.90, 127.67, 126.18, 122.48, 94.23, 75.00, 52.72, 21.16. HRMS: calcd 395.0259 for  $C_{19}H_{17}O_3NaBr[M+Na]^+$ , found 395.0248.

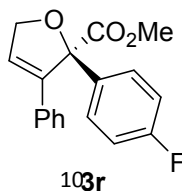

**3r**: colorless liquid, yield 71%; 71% ee, determined by HPLC (Daicel Chirapak IA, flow rate: 1.0 mL/min; hexane / isopropanol = 50 : 1; 254 nm; Retention time:  $t_{\text{major}} = 11.53$  min,  $t_{\text{minor}} = 16.43$  min);  $^1\text{H}$  NMR (500 MHz,  $\text{CDCl}_3$ )  $\delta$  7.44 – 7.34 (m, 2H), 7.28 – 7.24 (m, 4H), 7.03 (t,  $J = 8.7$  Hz, 1H), 6.52 (t,  $J = 1.9$  Hz, 1H), 5.01 (dd,  $J_1 = 13.9$  Hz,  $J_2 = 1.9$  Hz, 1H), 4.95 (dd,  $J_1 = 13.9$  Hz,  $J_2 = 1.9$  Hz, 1H), 3.81 (s, 3H).  $^{13}\text{C}$  NMR (125 MHz,  $\text{CDCl}_3$ )  $\delta$  172.01, 141.11, 135.20, 132.38, 129.40, 129.34, 128.15, 128.08, 127.81, 126.93, 115.21, 115.04, 94.07, 74.80, 52.60. HRMS: calcd 299.1005 for  $\text{C}_{18}\text{H}_{16}\text{FO}_3[\text{M}+\text{H}]^+$ , found 299.1045.

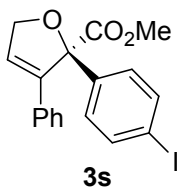

**3s**: colorless liquid, yield 70%; 92% ee, determined by HPLC (Daicel Chirapak IA, flow rate: 1.0 mL/min; hexane/isopropanol = 50 : 1; 254 nm; Retention time:  $t_{\text{major}} = 17.13$  min,  $t_{\text{minor}} = 23.83$  min);  $^1\text{H}$  NMR (500 MHz,  $\text{CDCl}_3$ )  $\delta$  7.78 – 7.49 (m, 2H), 7.27 (m, 4H), 7.16 – 7.11 (m, 2H), 6.50 (t,  $J = 1.9$  Hz, 1H), 5.02 (dd,  $J_1 = 13.8$  Hz,  $J_2 = 1.9$  Hz, 1H), 4.95 (dd,  $J_1 = 13.8$  Hz,  $J_2 = 1.9$  Hz, 1H), 3.81 (s, 3H).  $^{13}\text{C}$  NMR (125 MHz,  $\text{CDCl}_3$ )  $\delta$  171.76, 140.88, 139.08, 137.34, 132.27, 129.39, 128.20, 128.15, 127.84, 127.13, 94.38, 94.20, 74.97, 52.64. HRMS: calcd 407.0066 for  $\text{C}_{18}\text{H}_{16}\text{IO}_3[\text{M}+\text{H}]^+$ , found 407.0036.

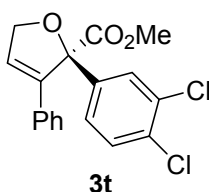

**3t**: colorless liquid, yield 78%; 88% ee, determined by HPLC (Daicel Chirapak IA, flow rate: 1.0 mL/min; hexane / isopropanol = 50 : 1; 254 nm; Retention time:  $t_{\text{major}} = 12.97$  min,  $t_{\text{minor}} = 17.01$  min);  $^1\text{H}$  NMR (500 MHz,  $\text{CDCl}_3$ )  $\delta$  7.54 (d,  $J = 2.2$  Hz, 1H), 7.39 (d,  $J = 8.4$  Hz, 1H), 7.29 (d,  $J = 2.3$  Hz, 1H), 7.29 – 7.27 (m, 2H), 7.27 – 7.23 (m, 2H), 7.21 (dd,  $J = 8.4, 2.2$  Hz, 1H), 6.49 (t,  $J = 1.9$  Hz, 1H), 5.04 (dd,  $J_1 = 13.9$  Hz,  $J_2 = 1.9$  Hz, 1H), 4.97 (dd,  $J_1 = 13.9$  Hz,  $J_2 = 1.9$  Hz, 1H), 3.82 (s, 3H).  $^{13}\text{C}$  NMR (125 MHz,  $\text{CDCl}_3$ )  $\delta$  171.41, 140.83, 139.55, 132.46, 132.40, 132.04, 130.06, 129.55, 128.73, 128.32, 127.83, 127.31, 126.89, 93.54, 75.19, 52.80. HRMS: calcd 349.0320 for  $\text{C}_{18}\text{H}_{15}\text{Cl}_2\text{O}_3[\text{M}+\text{H}]^+$ , found 349.0360.

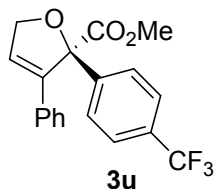

**3u**: colorless liquid, yield 40%; 76% ee, determined by HPLC (Daicel Chirapak IA, flow rate: 1.0 mL/min; hexane / isopropanol = 50 : 1; 254 nm; Retention time:  $t_{\text{major}} = 7.80$  min,  $t_{\text{minor}} = 8.75$  min);  $^1\text{H}$  NMR (400 MHz,  $\text{CDCl}_3$ ): 7.69 (dq,  $J_1 = 1.8$  Hz,  $J_2 = 0.9$  Hz, 1H), 7.63 – 7.53 (m, 2H), 7.45 (dt,  $J_1 = 7.8$  Hz,  $J_2 = 0.7$  Hz, 1H), 7.32 – 7.19 (m, 5H), 6.50 (s, 1H), 5.06 (dd,  $J_1 = 13.8$  Hz,  $J_2 = 1.9$  Hz, 1H), 4.99 (dd,  $J_1 = 13.8$  Hz,  $J_2 = 1.9$  Hz, 1H), 3.84 (s, 3H).;  $^{13}\text{C}$  NMR

(125 MHz, CDCl<sub>3</sub>)  $\delta$  171.64, 141.03, 140.32, 132.23, 130.80, 128.55, 128.25, 127.89, 127.33, 125.12, 125.09, 124.33, 124.30, 109.79, 94.04, 75.19, 52.75. HRMS: calcd 349.0973 for C<sub>19</sub>H<sub>16</sub>F<sub>3</sub>O<sub>3</sub>[M+H]<sup>+</sup>, found 349.0943.

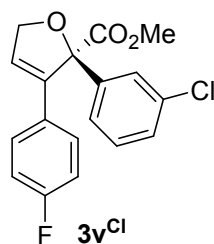

**3v<sup>Cl</sup>**: colorless liquid, yield 64%; 80% ee, determined by HPLC (Daicel Chirapak IA, flow rate: 1.0 mL/min; hexane / isopropanol = 50 : 1; 254 nm; Retention time:  $t_{\text{major}}$  = 11.41 min,  $t_{\text{minor}}$  = 15.73 min) ; <sup>1</sup>H NMR (500 MHz, CDCl<sub>3</sub>)  $\delta$  7.41 – 7.38 (m, 1H), 7.34 – 7.31 (m, 1H), 7.29 (d,  $J$  = 2.0 Hz, 1H), 7.25 – 7.20 (m, 3H), 7.00 – 6.87 (m, 2H), 6.44 (t,  $J$  = 1.9 Hz, 1H), 5.01 (dd,  $J_1$  = 13.9 Hz,  $J_2$  = 1.9 Hz, 1H), 4.97 (dd,  $J_1$  = 13.9 Hz,  $J_2$  = 1.9 Hz, 1H), 3.82 (s, 3H). <sup>13</sup>C NMR (125 MHz, CDCl<sub>3</sub>)  $\delta$  171.51, 141.18, 140.07, 134.37, 129.81, 129.75, 129.53, 128.66, 128.36, 127.51, 127.10, 127.08, 125.47, 115.22, 115.05, 94.12, 74.96, 52.69. HRMS: calcd 333.0616 for C<sub>18</sub>H<sub>15</sub>ClFO<sub>3</sub>[M+H]<sup>+</sup>, found 333.0666.

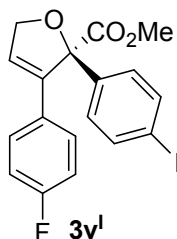

**3v<sup>I</sup>**: colorless liquid, yield 68%; 88% ee, determined by HPLC (Daicel Chirapak IA, flow rate: 1.0 mL/min; hexane / isopropanol = 50 : 1; 254 nm; Retention time:  $t_{\text{major}}$  = 16.51 min,  $t_{\text{minor}}$  = 22.77 min) ; <sup>1</sup>H NMR (500 MHz, CDCl<sub>3</sub>)  $\delta$  7.71 – 7.65 (m, 2H), 7.27 – 7.20 (m, 2H), 7.14 – 7.08 (m, 2H), 6.98 – 6.91 (m, 2H), 6.44 (t,  $J$  = 1.9 Hz, 1H), 5.00 (dd,  $J_1$  = 13.8 Hz,  $J_2$  = 2.0 Hz, 1H), 4.94 (dd,  $J_1$  = 13.8 Hz,  $J_2$  = 2.0 Hz, 1H), 3.81 (s, 3H). <sup>13</sup>C NMR (125 MHz, CDCl<sub>3</sub>)  $\delta$  171.67, 139.97, 138.90, 137.45, 129.77, 129.70, 129.25, 127.05, 115.24, 115.06, 94.51, 94.23, 74.91, 52.67. HRMS: calcd 424.9972 for C<sub>18</sub>H<sub>15</sub>FO<sub>3</sub>[M+H]<sup>+</sup>, found 424.9932.

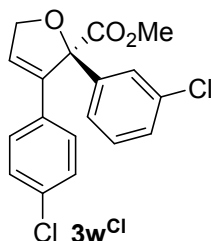

**3w<sup>Cl</sup>**: colorless liquid, yield 59%; 80% ee, determined by HPLC (Daicel Chirapak IA, flow rate: 1.0 mL/min; hexane / isopropanol = 50 : 1; 254 nm; Retention time:  $t_{\text{major}}$  = 11.41 min,  $t_{\text{minor}}$  = 15.53 min) ; <sup>1</sup>H NMR (500 MHz, CDCl<sub>3</sub>)  $\delta$  7.42 – 7.37 (m, 1H), 7.33 (ddd,  $J$  = 7.9, 2.1, 1.2 Hz, 1H), 7.31 – 7.21 (m, 5H), 7.21 – 7.16 (m, 2H), 6.50 (t,  $J$  = 1.9 Hz, 1H), 5.01 (dd,  $J_1$  = 14.1 Hz,  $J_2$  = 2.0 Hz, 1H), 4.97 (dd,  $J_1$  = 14.1 Hz,  $J_2$  = 2.0 Hz, 1H), 3.82 (s, 3H). <sup>13</sup>C NMR (126 MHz, CDCl<sub>3</sub>)  $\delta$  171.46, 141.09, 139.96, 134.42, 134.13, 130.69, 129.58, 129.24, 128.74, 128.38, 127.72, 127.52, 125.48, 94.08, 74.96, 52.72. HRMS: calcd 349.0320 for C<sub>18</sub>H<sub>15</sub>Cl<sub>2</sub>O<sub>3</sub>[M+H]<sup>+</sup>,

found 349.0350.

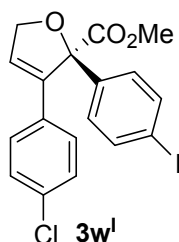

**3w<sup>I</sup>**: colorless liquid, yield 67%; 88% ee, determined by HPLC (Daicel Chirapak IA, flow rate: 1.0 mL/min; hexane / isopropanol = 50 : 1; 254 nm; Retention time:  $t_{\text{major}} = 15.80$  min,  $t_{\text{minor}} = 22.06$  min) ; <sup>1</sup>H NMR(400 MHz, CDCl<sub>3</sub>): δ 7.46 (d,  $J = 7.8$  Hz, 2H), 7.28 (s, 2H), 7.16 (d,  $J = 7.6$  Hz, 2H), 7.06 (d,  $J = 7.9$  Hz, 2H), 6.46 (s, 1H), 5.00 (dd,  $J_1 = 14.1$  Hz,  $J_2 = 1.9$  Hz, 1H), 4.94 (dd,  $J_1 = 14.1$  Hz,  $J_2 = 1.9$  Hz, 1H), 3.80 (s, 3H), 2.33 (s, 3H).; <sup>13</sup>C NMR(100 MHz, CDCl<sub>3</sub>): 171.77, 140.68, 138.45, 138.05, 131.85, 131.31, 129.26, 128.90, 127.67, 126.18, 122.48, 94.23, 75.00, 52.72, 21.16. HRMS: calcd 440.9676 for C<sub>18</sub>H<sub>14</sub>ClIO<sub>3</sub>[M+H]<sup>+</sup>, found 440.9696.

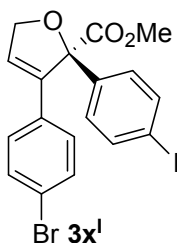

**3x<sup>I</sup>**: colorless liquid, yield 72%; 91% ee, determined by HPLC (Daicel Chirapak IA, flow rate: 1.0 mL/min; hexane / isopropanol = 50 : 1; 254 nm; Retention time:  $t_{\text{major}} = 16.38$  min,  $t_{\text{minor}} = 23.11$  min) ; <sup>1</sup>H NMR(500 MHz, CDCl<sub>3</sub>): δ 7.72 – 7.65 (m, 2H), 7.41 – 7.35 (m, 2H), 7.17 – 7.07 (m, 4H), 6.51 (t,  $J = 1.9$  Hz, 1H), 4.99 (dd,  $J_1 = 14.1$  Hz,  $J_2 = 1.9$  Hz, 1H), 4.93 (dd,  $J_1 = 14.1$  Hz,  $J_2 = 1.9$  Hz, 1H), 3.81 (s, 3H).<sup>13</sup>C NMR (125 MHz, CDCl<sub>3</sub>) δ 171.60, 139.92, 138.78, 137.51, 131.36, 131.18, 129.50, 129.26, 127.81, 122.37, 94.61, 94.16, 74.94, 52.71. HRMS: calcd 484.9171 for C<sub>18</sub>H<sub>15</sub>BrIO<sub>3</sub>[M+H]<sup>+</sup>, found 484.9201.

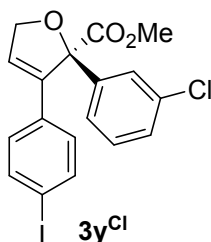

**3y<sup>Cl</sup>**: colorless liquid, yield 56%; 78% ee, determined by HPLC (Daicel Chirapak IA, flow rate: 1.0 mL/min; hexane / isopropanol = 50 : 1; 254 nm; Retention time:  $t_{\text{major}} = 12.32$  min,  $t_{\text{minor}} = 16.50$  min) ; <sup>1</sup>H NMR (500 MHz, CDCl<sub>3</sub>) δ 7.61 – 7.56 (m, 2H), 7.39 (t,  $J = 1.9$  Hz, 1H), 7.36 – 7.24 (m, 3H), 7.22 (dd,  $J = 1.9, 1.2$  Hz, 1H), 7.02 – 6.96 (m, 2H), 6.53 (t,  $J = 1.9$  Hz, 1H), δ 4.99 (dd,  $J_1 = 14.2$  Hz,  $J_2 = 1.9$  Hz, 1H), 4.95 (dd,  $J_1 = 14.2$  Hz,  $J_2 = 1.9$  Hz, 1H), 3.82 (s, 3H).; <sup>13</sup>C NMR (125 MHz, CDCl<sub>3</sub>) δ 171.44, 141.08, 140.07, 137.32, 134.43, 131.72, 129.66, 129.60, 128.76, 127.88, 127.53, 125.50, 94.10, 94.02, 74.98, 52.74. HRMS: calcd 440.9676 for C<sub>18</sub>H<sub>15</sub>ClIO<sub>3</sub>[M+H]<sup>+</sup>, found 440.9696.

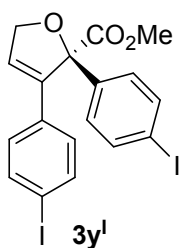

**3y<sup>I</sup>**: colorless liquid, yield 61%; 87% ee, determined by HPLC (Daicel Chirapak IA, flow rate: 1.0 mL/min; hexane / isopropanol = 50 : 1; 254 nm; Retention time:  $t_{\text{major}} = 17.43$  min,  $t_{\text{minor}} = 24.84$  min) ;  $^1\text{H NMR}$ (500 MHz,  $\text{CDCl}_3$ ):  $\delta$  7.71 – 7.65 (m, 2H), 7.61 – 7.55 (m, 2H), 7.13 – 7.07 (m, 2H), 7.00 (d,  $J = 8.7$  Hz, 2H), 6.53 (t,  $J = 1.9$  Hz, 1H),  $\delta$  4.98 (dd,  $J_1 = 14.1$  Hz,  $J_2 = 1.9$  Hz, 1H), 4.93 (dd,  $J_1 = 14.1$  Hz,  $J_2 = 1.9$  Hz, 1H), 3.81 (s, 3H).  $^{13}\text{C NMR}$  (126 MHz,  $\text{CDCl}_3$ )  $\delta$  171.60, 140.00, 138.77, 137.51, 137.33, 131.73, 129.62, 129.26, 127.84, 94.61, 94.13, 94.07, 74.93, 52.71. HRMS: calcd 532.9032 for  $\text{C}_{18}\text{H}_{14}\text{I}_2\text{O}_3$ [M+H]<sup>+</sup>, found 532.9052.

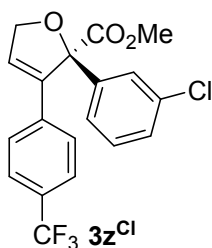

**3z<sup>Cl</sup>**: colorless liquid, yield 53%; 78% ee, determined by HPLC (Daicel Chirapak IA, flow rate: 1.0 mL/min; hexane / isopropanol = 50 : 1; 254 nm; Retention time:  $t_{\text{major}} = 10.28$  min,  $t_{\text{minor}} = 12.71$  min) ;  $^1\text{H NMR}$ (500 MHz,  $\text{CDCl}_3$ ):  $\delta$  7.54 – 7.48 (m, 2H), 7.39 – 7.26 (m, 5H), 7.22 (ddd,  $J = 7.8, 1.8, 1.2$  Hz, 1H), 6.60 (t,  $J = 1.9$  Hz, 1H), 5.08 – 4.97 (m, 2H), 3.83 (s, 3H).;  $^{13}\text{C NMR}$  (125 MHz,  $\text{CDCl}_3$ )  $\delta$  171.33, 140.95, 140.04, 135.84, 134.53, 129.67, 129.25, 128.87, 128.22, 127.46, 125.39, 125.13, 125.10, 125.08, 125.04, 94.14, 74.99, 52.76. HRMS: calcd 383.0584 for  $\text{C}_{19}\text{H}_{14}\text{ClF}_3\text{O}_3$ [M+H]<sup>+</sup>, found 383.0574.

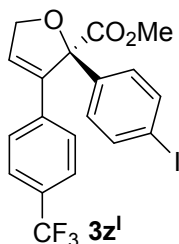

**3z<sup>I</sup>**: colorless liquid, yield 58%; 90% ee, determined by HPLC (Daicel Chirapak IA, flow rate: 1.0 mL/min; hexane / isopropanol = 50 : 1; 254 nm; Retention time:  $t_{\text{major}} = 13.63$  min,  $t_{\text{minor}} = 17.73$  min) ;  $^1\text{H NMR}$  (500 MHz,  $\text{CDCl}_3$ ):  $\delta$  7.72 – 7.67 (m, 2H), 7.51 (dt,  $J = 8.2, 0.7$  Hz, 2H), 7.37 (dd,  $J = 8.5, 1.2$  Hz, 2H), 7.29 (s, 1H), 7.13 – 7.08 (m, 2H), 6.60 (d,  $J = 1.9$  Hz, 1H), 5.03 (dd,  $J_1 = 14.4$  Hz,  $J_2 = 1.9$  Hz, 1H), 4.98 (dd,  $J_1 = 14.4$  Hz,  $J_2 = 2.0$  Hz, 1H)., 3.82 (s, 3H).  $^{13}\text{C NMR}$  (125 MHz,  $\text{CDCl}_3$ )  $\delta$  171.49, 139.94, 138.65, 138.08, 137.89, 137.65, 137.59, 131.33, 129.25, 129.16, 128.18, 125.12, 125.09, 125.06, 94.70, 94.25, 74.98, 52.74. HRMS: calcd 474.9940 for  $\text{C}_{19}\text{H}_{15}\text{F}_3\text{IO}_3$  [M+H]<sup>+</sup>, found 474.9945.

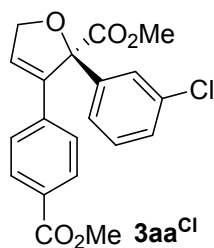

**3aa<sup>Cl</sup>**: colorless liquid, yield 43%; 76% ee, determined by HPLC (Daicel Chirapak IA, flow rate: 1.0 mL/min; hexane / isopropanol = 50 : 1; 254 nm; Retention time:  $t_{\text{major}} = 17.27$  min,  $t_{\text{minor}} = 21.58$  min) ; <sup>1</sup>H NMR (500 MHz, CDCl<sub>3</sub>):  $\delta$  7.92 (d,  $J = 8.8$  Hz, 2H), 7.40 (t,  $J = 1.9$  Hz, 1H), 7.36 – 7.24 (m, 5H), 7.24 – 7.19 (m, 1H), 6.62 (t,  $J = 1.9$  Hz, 1H), 5.03 (dd,  $J_1 = 14.3$  Hz,  $J_2 = 1.9$  Hz, 1H), 4.99 (dd,  $J_1 = 14.3$  Hz,  $J_2 = 2.0$  Hz, 1H), 3.91 (s, 3H), 3.81 (s, 3H); <sup>13</sup>C NMR (125 MHz, CDCl<sub>3</sub>)  $\delta$  171.39, 166.73, 141.02, 140.32, 136.73, 134.42, 129.59, 129.41, 129.24, 128.77, 127.85, 127.53, 125.48, 94.11, 75.03, 52.73, 52.05. HRMS: calcd 373.0765 for C<sub>20</sub>H<sub>18</sub>ClO<sub>5</sub>[M+H]<sup>+</sup>, found 373.0756.

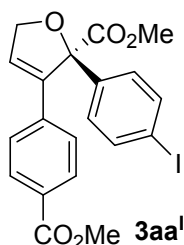

**3aa<sup>I</sup>**: colorless liquid, yield 50%; 90% ee, determined by HPLC (Daicel Chirapak IA, flow rate: 1.0 mL/min; hexane / isopropanol = 50 : 1; 254 nm; Retention time:  $t_{\text{major}} = 27.76$  min,  $t_{\text{minor}} = 34.29$  min) ; <sup>1</sup>H NMR (500 MHz, CDCl<sub>3</sub>):  $\delta$  7.95 – 7.89 (m, 2H), 7.68 (d,  $J = 8.8$  Hz, 2H), 7.36 – 7.27 (m, 3H), 7.13 – 7.08 (m, 2H), 6.62 (t,  $J = 1.9$  Hz, 1H), 5.03 (dd,  $J_1 = 14.3$  Hz,  $J_2 = 1.9$  Hz, 1H), 4.97 (dd,  $J_1 = 14.3$  Hz,  $J_2 = 2.0$  Hz, 1H), 3.92 (s, 3H), 3.81 (s, 3H); <sup>13</sup>C NMR (125 MHz, CDCl<sub>3</sub>)  $\delta$  171.54, 166.71, 140.26, 138.72, 137.51, 136.74, 129.58, 129.43, 129.25, 129.21, 127.82, 94.62, 94.22, 77.22, 76.97, 76.71, 74.98, 52.71, 52.06. HRMS: calcd 465.0121 for C<sub>20</sub>H<sub>18</sub>IO<sub>5</sub>[M+H]<sup>+</sup>, found 465.0128.

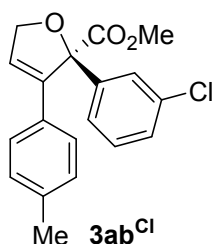

**3ab<sup>Cl</sup>**: colorless liquid, yield 76%; 80% ee, determined by HPLC (Daicel Chirapak IA, flow rate: 1.0 mL/min; hexane / isopropanol = 50 : 1; 254 nm; Retention time:  $t_{\text{major}} = 10.18$  min,  $t_{\text{minor}} = 16.55$  min) ; <sup>1</sup>H NMR (500 MHz, CDCl<sub>3</sub>):  $\delta$  7.43 (dt,  $J = 2.1, 0.9$  Hz, 1H), 7.35 – 7.23 (m, 4H), 7.19 – 7.13 (m, 2H), 7.11 – 7.04 (m, 2H), 6.47 (t,  $J = 1.9$  Hz, 1H),  $\delta$  5.01 (dd,  $J_1 = 13.7$  Hz,  $J_2 = 1.9$  Hz, 1H), 4.96 (dd,  $J_1 = 13.7$  Hz,  $J_2 = 2.0$  Hz, 1H), 3.82 (s, 3H); <sup>13</sup>C NMR (126 MHz, CDCl<sub>3</sub>)  $\delta$  171.67, 141.49, 140.74, 138.09, 134.21, 129.41, 129.28, 128.91, 128.49, 127.73, 127.71, 126.28, 125.70, 94.07, 75.00, 52.65, 21.03. HRMS: calcd 329.0866 for C<sub>19</sub>H<sub>18</sub>ClO<sub>3</sub>[M+H]<sup>+</sup>, found 329.0855.

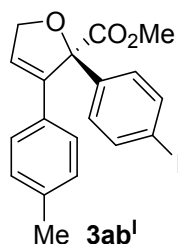

**3ab<sup>I</sup>**: colorless liquid, yield 72%; 86% ee, determined by HPLC (Daicel Chirapak IA, flow rate: 1.0 mL/min; hexane / isopropanol = 50 : 1; 254 nm; Retention time:  $t_{\text{major}} = 15.10$  min,  $t_{\text{minor}} = 19.84$  min) ;  $^1\text{H}$  NMR (500 MHz,  $\text{CDCl}_3$ ):  $\delta$  7.70 – 7.63 (m, 2H), 7.20 – 7.11 (m, 4H), 7.10 – 7.04 (m, 2H), 6.47 (t,  $J = 1.9$  Hz, 1H), 5.00 (dd,  $J = 13.8, 1.9$  Hz, 1H), 5.00 (dd,  $J_1 = 13.8$  Hz,  $J_2 = 1.9$  Hz, 1H), 4.93 (dd,  $J_1 = 13.8$  Hz,  $J_2 = 2.0$  Hz, 1H), 3.80 (s, 3H), 2.33 (s, 3H).;  $^{13}\text{C}$  NMR (125 MHz,  $\text{CDCl}_3$ )  $\delta$  171.84, 140.64, 139.19, 138.09, 137.32, 129.48, 129.30, 128.93, 127.69, 126.24, 94.35, 94.15, 74.96, 52.63, 21.03. HRMS: calcd 421.0222 for  $\text{C}_{19}\text{H}_{18}\text{I}\text{O}_3[\text{M}+\text{H}]^+$ , found 421.0235.

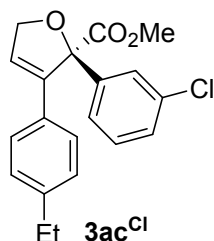

**3ac<sup>Cl</sup>**: colorless liquid, yield 78%; 87% ee, determined by HPLC (Daicel Chirapak IA, flow rate: 1.0 mL/min; hexane / isopropanol = 50 : 1; 254 nm; Retention time:  $t_{\text{major}} = 9.10$  min,  $t_{\text{minor}} = 14.21$  min) ;  $^1\text{H}$  NMR(400 MHz,  $\text{CDCl}_3$ ): $\delta$ 7.40 (s, 1H), 7.28 (d,  $J = 4.7$  Hz, 1H), 7.24 (d,  $J = 4.5$  Hz, 2H), 7.16 (d,  $J = 7.9$  Hz, 2H), 7.07 (d,  $J = 7.9$  Hz, 2H), 6.45 (s, 1H), 4.97 (dd,  $J_1 = 13.8$  Hz,  $J_2 = 1.9$  Hz, 1H), 4.93 (dd,  $J_1 = 13.8$  Hz,  $J_2 = 2.0$  Hz, 1H), 3.79 (s, 3H), 2.60 (d,  $J = 7.6$  Hz, 2H), 1.20 (t,  $J = 7.6$  Hz, 3H) ;  $^{13}\text{C}$  NMR(100 MHz,  $\text{CDCl}_3$ ): 171.58, 144.30, 141.45, 140.72, 134.17, 129.45, 129.39, 128.47, 127.76, 127.70, 127.66, 126.27, 125.68, 94.10, 75.05, 52.74, 29.70, 15.22 HRMS: calcd 343.1023 for  $\text{C}_{20}\text{H}_{20}\text{Cl}\text{O}_3[\text{M}+\text{H}]^+$ , found 343.1056.

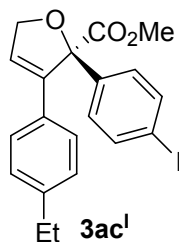

**3ac<sup>I</sup>**: colorless liquid, yield 76%; 82% ee, determined by HPLC (Daicel Chirapak IA, flow rate: 1.0 mL/min; hexane / isopropanol = 50 : 1; 254 nm; Retention time:  $t_{\text{major}} = 9.22$  min,  $t_{\text{minor}} = 11.27$  min) ;  $^1\text{H}$  NMR(500 MHz,  $\text{CDCl}_3$ ):  $\delta$  7.70 – 7.64 (m, 2H), 7.29 (s, 1H), 7.23 – 7.06 (m, 6H), 6.48 (t,  $J = 1.9$  Hz, 1H), 5.00 (dd,  $J_1 = 13.8$  Hz,  $J_2 = 1.9$  Hz, 1H), 4.93 (dd,  $J_1 = 13.8$  Hz,  $J_2 = 1.9$  Hz, 1H), 3.80 (s, 3H), 2.63 (q,  $J = 7.6$  Hz, 2H), 1.23 (t,  $J = 7.6$  Hz, 3H).;  $^{13}\text{C}$  NMR (126 MHz,  $\text{CDCl}_3$ )  $\delta$  171.85, 144.35, 140.63, 139.20, 137.32, 129.50, 129.48, 127.72, 127.71, 126.26, 94.34, 94.15, 74.96, 52.63, 28.36, 15.07. HRMS: calcd 435.0379 for  $\text{C}_{20}\text{H}_{20}\text{I}\text{O}_3$  [M+H]<sup>+</sup>, found 435.0367.

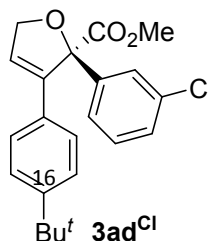



**3ad<sup>Cl</sup>**: colorless liquid, yield 78%; 67% ee, determined by HPLC (Daicel Chirapak IA, flow rate: 1.0 mL/min; hexane / isopropanol = 50 : 1; 254 nm; Retention time:  $t_{\text{major}} = 7.64$  min,  $t_{\text{minor}} = 10.68$  min) ;  $^1\text{H NMR}$ (400 MHz,  $\text{CDCl}_3$ ):  $\delta$  7.40 (s, 1H), 7.31 – 7.27 (m, 1H), 7.26 – 7.23 (m, 4H), 7.18 (d,  $J = 8.3$  Hz, 2H), 6.47 (s, 1H), 5.00 (dd,  $J_1 = 13.8$ ,  $J_2 = 2.0$  Hz, 1H), 4.93 (dd,  $J_1 = 13.8$ ,  $J_2 = 2.0$  Hz, 1H), 3.79 (s, 3H), 1.28 (s, 9H);  $^{13}\text{C NMR}$ (100 MHz,  $\text{CDCl}_3$ ): 171.58, 151.14, 141.51, 140.60, 134.17, 129.41, 129.13, 128.47, 127.73, 127.44, 126.30, 125.70, 125.11, 94.09, 75.05, 52.75, 41.99, 31.18. HRMS: calcd 393.1233 for  $\text{C}_{22}\text{H}_{23}\text{O}_3\text{NaCl}[\text{M}+\text{Na}]^+$ , found 393.1220.

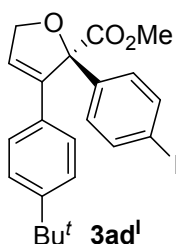

**3ad<sup>I</sup>**: colorless liquid, yield 70%; 71% ee, determined by HPLC (Daicel Chirapak IA, flow rate: 1.0 mL/min; hexane / isopropanol = 50 : 1; 254 nm; Retention time:  $t_{\text{major}} = 12.65$  min,  $t_{\text{minor}} = 15.98$  min) ;  $^1\text{H NMR}$  (500 MHz,  $\text{CDCl}_3$ ):  $\delta$  7.71 – 7.65 (m, 2H), 7.31 – 7.25 (m, 2H), 7.25 – 7.20 (m, 2H), 7.19 – 7.13 (m, 2H), 6.51 (t,  $J = 1.9$  Hz, 1H), 5.00 (dd,  $J_1 = 13.8$ ,  $J_2 = 1.9$  Hz, 1H), 4.93 (dd,  $J_1 = 13.8$ ,  $J_2 = 2.0$  Hz, 1H), 3.81 (s, 3H), 1.31 (s, 9H).  $^{13}\text{C NMR}$  (126 MHz,  $\text{CDCl}_3$ )  $\delta$  171.87, 151.20, 140.47, 139.26, 137.34, 129.57, 129.15, 127.40, 126.33, 125.16, 94.37, 94.14, 74.96, 52.65, 34.45, 31.07. HRMS: calcd 463.0692 for  $\text{C}_{22}\text{H}_{24}\text{IO}_3[\text{M}+\text{H}]^+$ , found 463.0703.

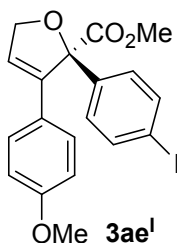

**3ae<sup>I</sup>**: colorless liquid, yield 81%; 82% ee, determined by HPLC (Daicel Chirapak IA, flow rate: 1.0 mL/min; hexane / isopropanol = 50 : 1; 254 nm; Retention time:  $t_{\text{major}} = 25.29$  min,  $t_{\text{minor}} = 45.43$  min) ;  $^1\text{H NMR}$ (500 MHz,  $\text{CDCl}_3$ ):  $\delta$  7.70 – 7.64 (m, 2H), 7.25 – 7.19 (m, 2H), 7.17 – 7.11 (m, 2H), 6.82 – 6.76 (m, 2H), 6.41 (t,  $J = 1.9$  Hz, 1H), 4.99 (dd,  $J_1 = 13.7$  Hz,  $J_2 = 1.9$  Hz, 1H), 4.92 (dd,  $J_1 = 13.6$  Hz,  $J_2 = 2.0$  Hz, 1H), 3.81 (s, 3H), 3.80 (s, 3H).;  $^{13}\text{C NMR}$  (126 MHz,  $\text{CDCl}_3$ )  $\delta$  171.90, 159.46, 140.14, 139.20, 137.35, 129.50, 129.12, 125.27, 124.61, 113.57, 94.37, 94.16, 74.95, 55.11, 52.63. HRMS: calcd 437.0172 for  $\text{C}_{19}\text{H}_{18}\text{IO}_4[\text{M}+\text{H}]^+$ , found 437.0186.

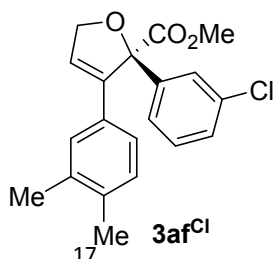

**3af<sup>Cl</sup>**: colorless liquid, yield 61%; 80% ee, determined by HPLC (Daicel Chirapak IA, flow rate: 1.0 mL/min; hexane / isopropanol = 60 : 1; 254 nm; Retention time:  $t_{\text{major}} = 8.46$  min,  $t_{\text{minor}} = 11.25$  min); <sup>1</sup>H NMR(400 MHz, CDCl<sub>3</sub>): δ 7.41 (d,  $J = 1.1$  Hz, 1H), 7.30 – 7.26 (m, 1H), 7.25 – 7.21 (m, 2H), 7.05 (s, 1H), 6.98 (d,  $J = 7.9$  Hz, 1H), 6.91 (d,  $J = 7.9$  Hz, 1H), 6.42 (s, 1H), 4.99 (dd,  $J_1 = 13.7$  Hz,  $J_2 = 1.9$  Hz, 1H), 4.92 (dd,  $J_1 = 13.8$  Hz,  $J_2 = 2.0$  Hz, 1H), 3.79 (s, 3H), 2.20 (d,  $J = 11.6$  Hz, 6H); <sup>13</sup>C NMR (100 MHz, CDCl<sub>3</sub>): 171.60, 141.53, 140.84, 136.77, 136.30, 134.11, 129.72, 129.39, 129.32, 128.96, 128.41, 127.70, 126.07, 125.68, 125.30, 94.05, 75.04, 52.73, 19.82, 19.49. HRMS: calcd 365.0920 for C<sub>20</sub>H<sub>19</sub>O<sub>3</sub>NaCl[M+Na]<sup>+</sup>, found 365.0907.

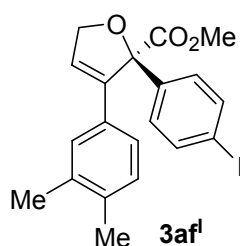

**3af<sup>I</sup>**: colorless liquid, yield 74%; 85% ee, determined by HPLC (Daicel Chirapak IA, flow rate: 1.0 mL/min; hexane / isopropanol = 50 : 1; 254 nm; Retention time:  $t_{\text{major}} = 12.64$  min,  $t_{\text{minor}} = 16.43$  min); <sup>1</sup>H NMR(500 MHz, CDCl<sub>3</sub>): δ 7.69 – 7.63 (m, 2H), 7.29 (s, 1H), 7.17 – 7.08 (m, 3H), 7.01 (d,  $J = 8.0$  Hz, 1H), 6.96 (d,  $J = 2.0$  Hz, 1H), 6.45 (t,  $J = 1.9$  Hz, 1H), 4.99 (dd,  $J_1 = 13.7$  Hz,  $J_2 = 1.9$  Hz, 1H), 4.92 (dd,  $J_1 = 13.8$  Hz,  $J_2 = 2.0$  Hz, 1H), 3.81 (s, 3H), 2.24 (s, 3H), 2.21 (s, 3H); <sup>13</sup>C NMR (125 MHz, CDCl<sub>3</sub>): δ 171.88, 140.75, 139.27, 137.26, 136.84, 136.39, 129.75, 129.50, 129.44, 128.90, 126.06, 125.25, 94.27, 94.09, 74.94, 52.62, 19.70, 19.34. HRMS: calcd 435.0379 for C<sub>20</sub>H<sub>20</sub>IO<sub>3</sub>[M+H]<sup>+</sup>, found 435.0398.

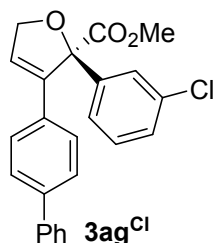

**3ag<sup>Cl</sup>**: colorless liquid, yield 71%; 86% ee, determined by HPLC (Daicel Chirapak IA, flow rate: 1.0 mL/min; hexane / isopropanol = 50 : 1; 254 nm; Retention time:  $t_{\text{major}} = 15.03$  min,  $t_{\text{minor}} = 24.37$  min); <sup>1</sup>H NMR(500 MHz, CDCl<sub>3</sub>): δ 7.62 – 7.56 (m, 2H), 7.54 – 7.41 (m, 5H), 7.40 – 7.27 (m, 6H), 6.58 (t,  $J = 1.9$  Hz, 1H), 5.05 (dd,  $J_1 = 14.0$  Hz,  $J_2 = 1.9$  Hz, 1H), 4.99 (dd,  $J_1 = 14.0$  Hz,  $J_2 = 2.0$  Hz, 1H), 3.85 (s, 3H); <sup>13</sup>C NMR (126 MHz, CDCl<sub>3</sub>): δ 171.66, 141.39, 140.82, 140.48, 140.37, 134.33, 131.07, 129.53, 128.83, 128.63, 128.25, 127.73, 127.53, 127.14, 126.96, 126.82, 125.70, 94.12, 75.04, 52.72. HRMS: calcd 391.1023 for C<sub>24</sub>H<sub>20</sub>ClO<sub>3</sub>[M+H]<sup>+</sup>, found 391.1049.

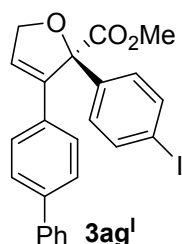

**3ag<sup>I</sup>**: colorless liquid, yield 73%; 92% ee, determined by HPLC (Daicel Chirapak IA, flow rate: 1.0 mL/min; hexane / isopropanol = 50 : 1; 254 nm; Retention time:  $t_{\text{major}} = 24.07$  min,  $t_{\text{minor}} = 48.52$  min) ;  $^1\text{H NMR}$ (400 MHz,  $\text{CDCl}_3$ ):  $\delta$  7.46 (d,  $J = 7.8$  Hz, 2H), 7.28 (s, 2H), 7.16 (d,  $J = 7.6$  Hz, 2H), 7.06 (d,  $J = 7.9$  Hz, 2H), 6.46 (s, 1H), 5.03 (dd,  $J_1 = 14.0$  Hz,  $J_2 = 1.9$  Hz, 1H), 4.97 (dd,  $J_1 = 13.9$  Hz,  $J_2 = 2.0$  Hz, 1H), 3.80 (s, 3H), 2.33 (s, 3H).;  $^{13}\text{C NMR}$ (100 MHz,  $\text{CDCl}_3$ ): 171.77, 140.68, 138.45, 138.05, 131.85, 131.31, 129.26, 128.90, 127.67, 126.18, 122.48, 94.23, 75.00, 52.72, 21.16. HRMS: calcd 483.0379 for  $\text{C}_{24}\text{H}_{19}\text{IO}_3[\text{M}+\text{H}]^+$ , found 483.0386.

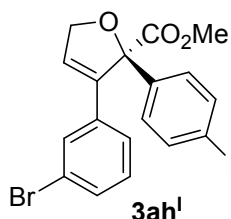

**3ah<sup>I</sup>**: colorless liquid, yield 80%; 93% ee, determined by HPLC (Daicel Chirapak IA, flow rate: 1.0 mL/min; hexane / isopropanol = 50 : 1; 254 nm; Retention time:  $t_{\text{major}} = 15.77$  min,  $t_{\text{minor}} = 24.45$  min) ;  $^1\text{H NMR}$ (500 MHz,  $\text{CDCl}_3$ ):  $\delta$  7.72 – 7.66 (m, 2H), 7.48 (dt,  $J = 2.1, 0.9$  Hz, 1H), 7.40 (ddd,  $J = 6.2, 3.0, 2.0$  Hz, 1H), 7.29 (s, 1H), 7.14 – 7.07 (m, 4H), 6.51 (t,  $J = 1.9$  Hz, 1H), 5.01 (dd,  $J = 14.2, 1.9$  Hz, 1H), 5.01 (dd,  $J_1 = 14.2$  Hz,  $J_2 = 1.9$  Hz, 1H), 4.95 (dd,  $J_1 = 14.1$  Hz,  $J_2 = 2.0$  Hz, 1H), 3.82 (s, 3H).;  $^{13}\text{C NMR}$  (125 MHz,  $\text{CDCl}_3$ )  $\delta$  171.51, 139.82, 138.72, 137.48, 134.46, 131.13, 130.85, 129.67, 129.16, 128.46, 126.52, 122.25, 94.58, 94.15, 74.88, 52.73. HRMS: calcd 483.9171 for  $\text{C}_{18}\text{H}_{15}\text{BrIO}_3[\text{M}+\text{H}]^+$ , found 483.9179.

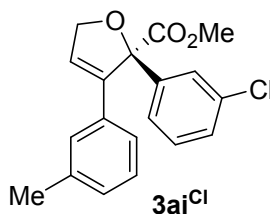

**3ai<sup>Cl</sup>**: colorless liquid, yield 73%; 85% ee, determined by HPLC (Daicel Chirapak IA, flow rate: 1.0 mL/min; hexane / isopropanol = 50 : 1; 254 nm; Retention time:  $t_{\text{major}} = 9.48$  min,  $t_{\text{minor}} = 14.60$  min) ;  $^1\text{H NMR}$ (400 MHz,  $\text{CDCl}_3$ ):  $\delta$  7.43 (dt,  $J = 2.1, 0.9$  Hz, 1H), 7.34 – 7.23 (m, 4H), 7.18 – 7.11 (m, 1H), 7.11 – 7.07 (m, 2H), 7.04 – 6.98 (m, 1H), 6.47 (t,  $J = 1.9$  Hz, 1H), 5.02 (dd,  $J = 13.8, 1.9$  Hz, 1H), 5.02 (dd,  $J_1 = 13.8$  Hz,  $J_2 = 1.9$  Hz, 1H), 4.96 (dd,  $J_1 = 13.8$  Hz,  $J_2 = 2.0$  Hz, 1H), 3.82 (s, 3H), 2.31 (s, 3H).;  $^{13}\text{C NMR}$ (125 MHz,  $\text{CDCl}_3$ ):  $\delta$  171.63, 141.45, 141.14, 137.74, 134.16, 132.24, 129.35, 128.96, 128.56, 128.46, 128.05, 127.65, 126.93, 125.61, 125.03, 94.06, 75.01, 52.66, 21.29. HRMS: calcd 329.0866 for  $\text{C}_{19}\text{H}_{18}\text{ClO}_3[\text{M}+\text{H}]^+$ , found 329.0878.

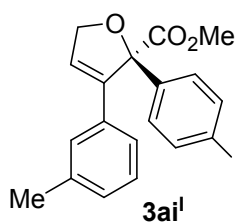

**3ai<sup>I</sup>**: colorless liquid, yield 75%; 85% ee, determined by HPLC (Daicel Chirapak IA, flow rate:

1.0 mL/min; hexane / isopropanol = 50 : 1; 254 nm; Retention time:  $t_{\text{major}} = 13.07$  min,  $t_{\text{minor}} = 18.14$  min);  $^1\text{H NMR}$ (400 MHz,  $\text{CDCl}_3$ ):  $\delta$  7.70 – 7.64 (m, 2H), 7.18 – 7.06 (m, 5H), 7.01 (d,  $J = 7.5$  Hz, 1H), 6.48 (t,  $J = 1.9$  Hz, 1H), 5.01 (dd,  $J_1 = 13.8$  Hz,  $J_2 = 1.9$  Hz, 1H), 4.93 (dd,  $J_1 = 13.8$  Hz,  $J_2 = 1.9$  Hz, 1H), 3.81 (s, 3H), 2.31 (s, 3H);  $^{13}\text{C NMR}$ (125 MHz,  $\text{CDCl}_3$ ):  $\delta$  171.81, 141.00, 139.18, 137.79, 137.27, 132.25, 129.43, 128.97, 128.47, 128.08, 126.94, 124.94, 94.31, 94.14, 74.96, 52.64, 21.32. HRMS: calcd 421.0222 for  $\text{C}_{19}\text{H}_{18}\text{IO}_3[\text{M}+\text{H}]^+$ , found 421.0249.

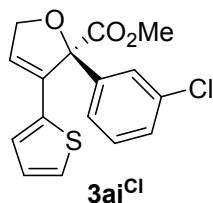

**3aj<sup>Cl</sup>**: colorless liquid, yield 40%; 72% ee, determined by HPLC (Daicel Chirapak IA, flow rate: 1.0 mL/min; hexane / isopropanol = 50 : 1; 254 nm; Retention time:  $t_{\text{major}} = 11.39$  min,  $t_{\text{minor}} = 19.98$  min);  $^1\text{H NMR}$  (500 MHz,  $\text{CDCl}_3$ ):  $\delta$  7.46 – 7.41 (m, 1H), 7.36 – 7.27 (m, 4H), 7.21 (dd,  $J = 5.1, 1.2$  Hz, 1H), 6.92 – 6.82 (m, 2H), 6.46 (t,  $J = 2.0$  Hz, 1H), 5.00 ( $J_1 = 14.1$  Hz,  $J_2 = 2.0$  Hz, 1H), 4.95 (dd,  $J_1 = 14.1$  Hz,  $J_2 = 2.1$  Hz, 1H), 3.85 (s, 3H);  $^{13}\text{C NMR}$  (125 MHz,  $\text{CDCl}_3$ )  $\delta$  171.31, 140.92, 134.92, 134.76, 134.27, 129.51, 128.79, 127.90, 127.46, 127.35, 126.33, 125.81, 125.52, 94.09, 75.01, 52.72. HRMS: calcd 321.0274 for  $\text{C}_{16}\text{H}_{14}\text{ClO}_3\text{S}[\text{M}+\text{H}]^+$ , found 321.0292.

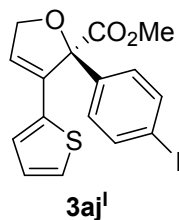

**3aj<sup>I</sup>**: colorless liquid, yield 48%; 77% ee, determined by HPLC (Daicel Chirapak IA, flow rate: 1.0 mL/min; hexane / isopropanol = 50 : 1; 254 nm; Retention time:  $t_{\text{major}} = 19.19$  min,  $t_{\text{minor}} = 29.04$  min);  $^1\text{H NMR}$  (500 MHz,  $\text{CDCl}_3$ ):  $\delta$  7.72 – 7.66 (m, 2H), 7.23 – 7.14 (m, 3H), 6.91 – 6.81 (m, 2H), 6.45 (t,  $J = 2.0$  Hz, 1H), 4.99 (dd,  $J_1 = 14.1$  Hz,  $J_2 = 2.0$  Hz, 1H), 4.93 (dd,  $J_1 = 14.1$  Hz,  $J_2 = 2.1$  Hz, 1H), 3.84 (s, 3H);  $^{13}\text{C NMR}$  (126 MHz,  $\text{CDCl}_3$ )  $\delta$  171.49, 138.63, 137.43, 134.83, 134.81, 129.59, 127.47, 127.37, 126.31, 125.50, 94.69, 94.23, 74.97, 52.70.; HRMS: calcd 411.9630 for  $\text{C}_{16}\text{H}_{14}\text{IO}_3\text{S}[\text{M}+\text{H}]^+$ , found 411.9656.

## E. Mechanistic experiments

### 1. Titration of (*R*)-3,5-DM-BINAP into AgSbF<sub>6</sub> in <sup>1</sup>H NMR analysis

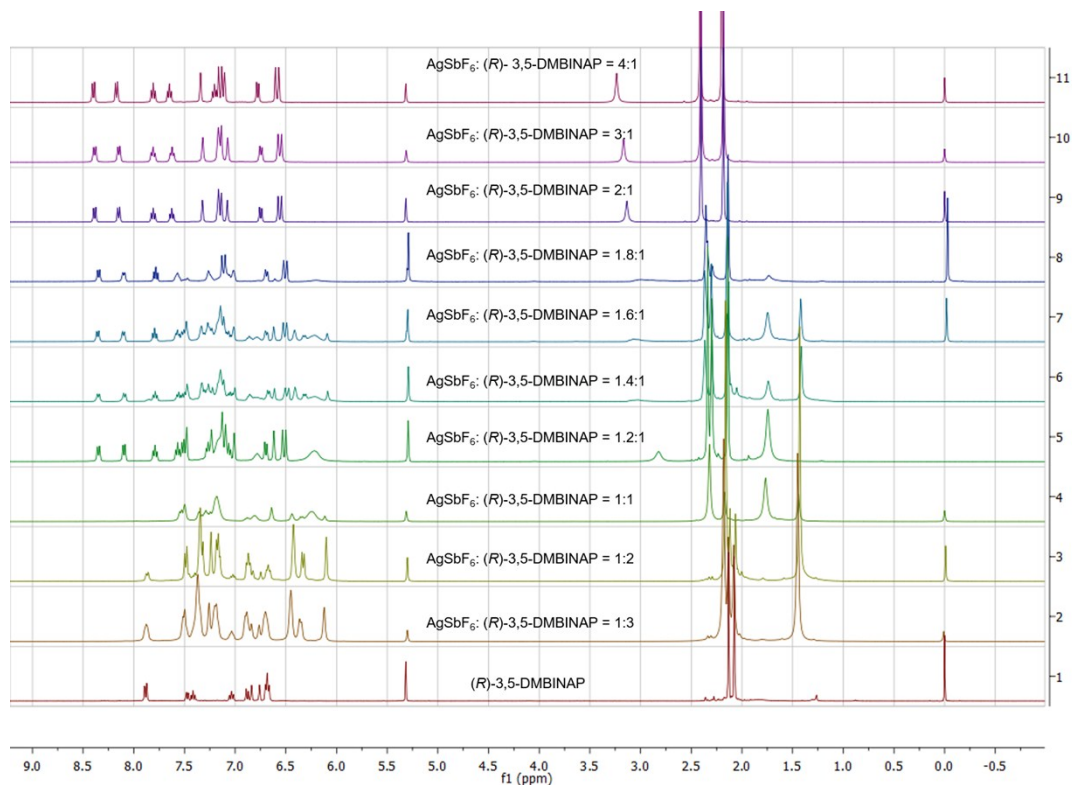

**Figure S1:** Stacked spectra of <sup>1</sup>H NMR of AgSbF<sub>6</sub> and (*R*)-3,5-DM-BINAP with ratio of 0:1, 1:1, 2:1, 3:1, and 4:1. We observed a stable complex signal when the ratio was increased to 1:2 (Supporting information, Figure S1), suggesting that the complex of (*R*)-3,5-DM-BINAP and AgSbF<sub>6</sub> adopted a 1:2 coordination in the reaction.

## 2. Titration of (*R*)-3,5-DM-BINAP into AgSbF<sub>6</sub> in <sup>31</sup>P NMR analysis

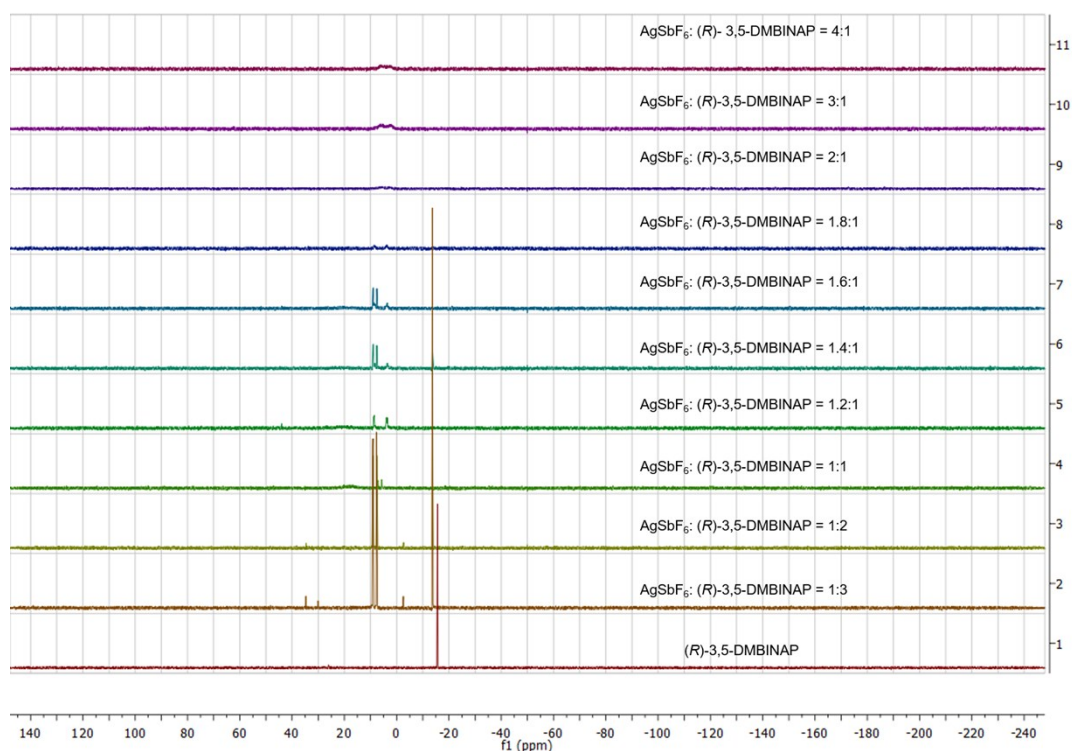

**Figure S2:** Stacked spectra of <sup>31</sup>P NMR of AgSbF<sub>6</sub> and (*R*)-3,5-DM-BINAP with ratio of 0:1, 1:1, 2:1, 3:1, and 4:1. <sup>31</sup>P NMR for 1:1 shows the presence of fine free phosphine peaks along with broad peaks due to complex formation, whereas, the absence of free phosphine peaks and presence of only broad pattern for remaining ratios (1:2, 1:3, 1:4) also suggest a 1:2 ratio is needed for complete conversion of (*R*)-3,5-DM-BINAP to the active chiral catalytic complex.

### 3. HMRS analysis of the [(R)-3,5-DM-BINAP](AgSbF<sub>6</sub>)<sub>2</sub>

#### Elemental Composition Report

##### Single Mass Analysis

Tolerance = 1000.0 PPM / DBE: min = -1.5, max = 50.0

Element prediction: Off

Monoisotopic Mass, Odd and Even Electron Ions

2 formula(e) evaluated with 1 results within limits (up to 50 closest results for each mass)

Elements Used:

C: 26-26 H: 24-24 P: 1-1 Ag: 0-1

HWH-GK-5-C.32 (0.639)

1: TOF MS ES+

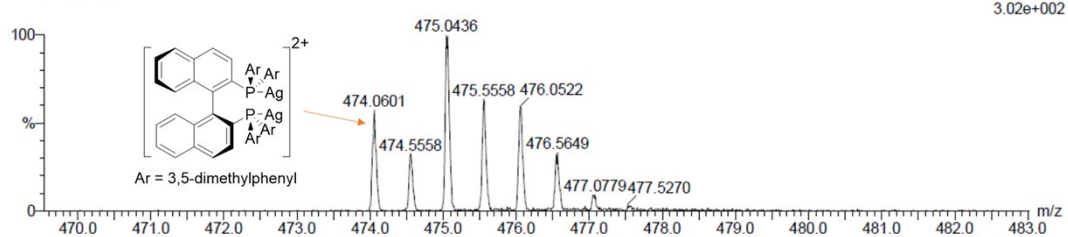

**Figure S3:** High resolution mass spectrometry (HRMS) of [(R)-3,5-DM-BINAP](AgSbF<sub>6</sub>)<sub>2</sub>

## 5. Nonlinear effect of silver catalyst

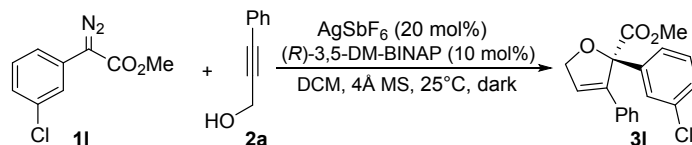

**Scheme S5. Nonlinear effect of [(*R*)-3,5-DM-BINAP](AgSbF<sub>6</sub>)<sub>2</sub>**

An oven-dried vial was charged with 50 mg 4 Å MS, (*R*)-3,5-DM-BINAP (0.01 mmol; 20% ee, 40% ee, 60% ee, 80% ee and 100% ee; Daicel Chirapak OD-H, flow rate: 1.0 mL/min, hexane: isopropanol = 800:1), AgSbF<sub>6</sub> (0.02 mmol) and anhydrous dichloromethane (0.5 mL) at 25°C. The mixture was stirred for 2 h, and a solution of phenyl propargyl alcohol (0.05 mmol) in anhydrous dichloromethane (0.5 mL) was added. After stirring for 1 h, a solution of diazoacetate (0.075 mmol) in anhydrous dichloromethane (1 mL) was added slowly. An aliquot of the mixture was taken out after stirring for 12 h. For each reaction using different ee value of the catalyst, the ee value of the target product was determined by HPLC (Daicel Chirapak IA, flow rate: 1.0 mL/min, hexane/ isopropanol = 50:1; 254 nm; retention time:  $t_{\text{major}} = 10.87$  min,  $t_{\text{minor}} = 14.84$  min). The template reaction of **11** and **2a** leading to **31** had a positive nonlinear effect (Figure S1). This finding suggests that there is possibly more than one equivalent of chiral silver catalyst binding to the substrate in the key transition state.

## 6. Control experiment of using Rh<sub>2</sub>(OAc)<sub>4</sub> as a cocatalyst

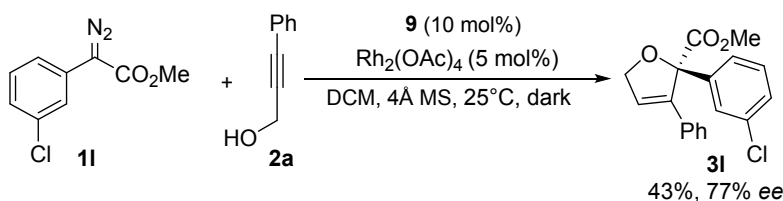

**Scheme S6. Control experiment of using Rh<sub>2</sub>(OAc)<sub>4</sub> as a cocatalyst leads to the decrease in chemoselectivity and enantioselectivity.**

An oven-dried vial was charged with 100 mg 4 Å MS, (*R*)-3,5-DM-BINAP (10 mol%), AgSbF<sub>6</sub> (20 mol%), Rh<sub>2</sub>(OAc)<sub>4</sub> (5% mol%) and anhydrous dichloromethane (0.5 mL) at 25°C in dark. The mixture was stirred for 2 h, and a solution of phenyl propargyl alcohol (0.1 mmol) in anhydrous dichloromethane (0.5 mL) was added. After stirring for 1 h, a solution of diazoacetate (0.15 mmol) in anhydrous dichloromethane (2 mL) was added slowly. After stirring for 48 h, 4 Å MS were filtered and the solvent was removed to give the crude product. The crude product was then purified by flash chromatography on silica gel (PE/EA = 40:1~20:1) to give the pure product. Then the pure product **31** was applied to NMR and chiral HPLC analysis.

## 7. Kinetic Study: determination of the catalyst order



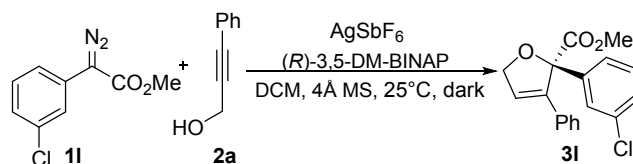

**Scheme S7. Kinetic study of [(*R*)-3,5-DM-BINAP](AgSbF<sub>6</sub>)<sub>2</sub>-catalyzed formal [4+1] cycloaddition**

An oven-dried vial was charged with 100 mg 4Å MS, (*R*)-3,5-DM-BINAP (0.005 mmol, 5 mol%; 0.010 mmol, 10 mol%; 0.015 mmol, 15 mol%; 0.020 mmol, 20 mol%), AgSbF<sub>6</sub> (2 equiv of BINAP ligand) and anhydrous dichloromethane (0.5 mL) at 25°C. The mixture was stirred for 2 h, and a solution of phenyl propargyl alcohol (0.1 mmol) in anhydrous dichloromethane (0.5 mL) was added. After stirring for 1 h, a solution of diazoacetate **11** (0.15 mmol) in anhydrous dichloromethane (2 mL) was added slowly. An aliquot of the reaction mixture (0.2 mL) was taken out in every 30 min. After simple work-up to remove 4Å MS, the conversion of the sample (Figure S5) was measured by HPLC (Waters e2695, Kromasil 100-5C18, flow rate: 1.0 mL / min; water / aceto- nitrile = 1:1).

The initial reaction rate  $V_0$  was obtained for each catalyst loading. Then we found a linear correlation between  $V_0$  and the square of catalyst loading, which indicates second order kinetics of the chiral silver catalyst (Table S2 and Figure S6).

**The calculation of initial reaction rate.**  $F(t)$ : correlation of HPLC product yield and time,  $G(t)$ : correlation of product concentration and time;  $n$ : the reaction scale;  $V$ : the total volume of the reaction mixture. The initial rate =  $G'(0) = nF'(0)/V$ .

**Possible reason to explain why the reaction kinetics contains the induction period.**

Since the reaction requires the bifunctionality of **9** which coordinates with carbene and alkyne separately. We assume it needs a short time to get to the equilibrium with the bi-catalysts coordination model as the major coordination model. This is probably why the reaction rate increases after 10-20% conversion.

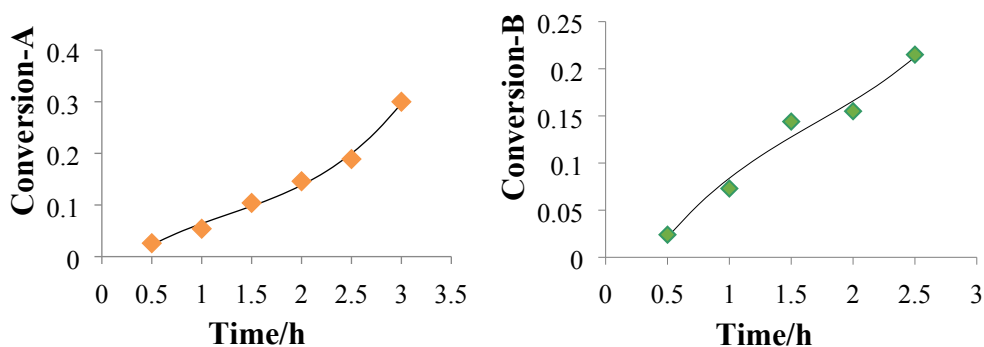

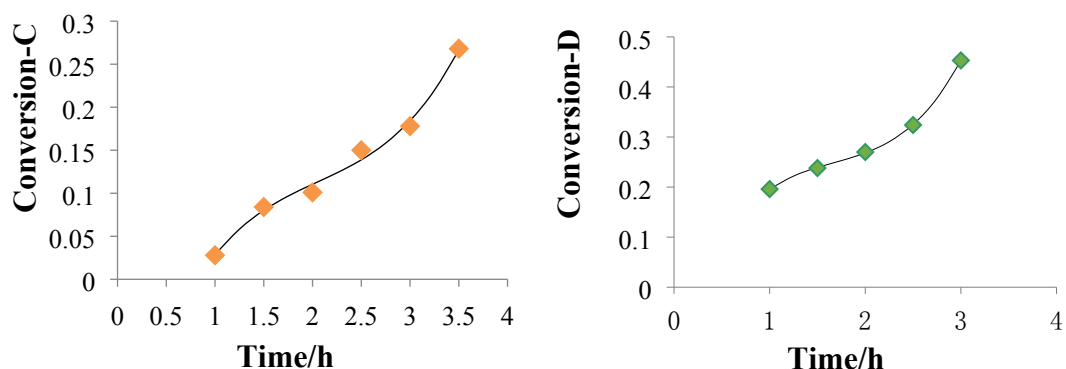

**Figure S4:** Real-time monitoring of conversion of reactions. A) 5 mol% catalyst loading; B) 10 mol% catalyst loading; C) 15 mol% catalyst loading; D) 20 mol% catalyst loading. The initial reaction rate  $V_0$  was obtained for each catalyst loading. Then we found a linear correlation between  $V_0$  and the square of catalyst loading, which indicates second order kinetics of the chiral silver catalyst.

**Table S2:** the relationship of initial rate and square of catalyst concentration

| Entry | catalyst loading (mol %) | $C^*C$ (mol <sup>2</sup> /L <sup>2</sup> ) | $V_0$ (mol·L <sup>-1</sup> ·h <sup>-1</sup> ) |
|-------|--------------------------|--------------------------------------------|-----------------------------------------------|
| A     | 5                        | 0.00008                                    | 0.00526                                       |
| B     | 10                       | 0.00033                                    | 0.00771                                       |
| C     | 15                       | 0.00075                                    | 0.01251                                       |
| D     | 20                       | 0.00133                                    | 0.01758                                       |

#### F. Derivatization of enantiopure 2,5-dihydrofuran **3k**

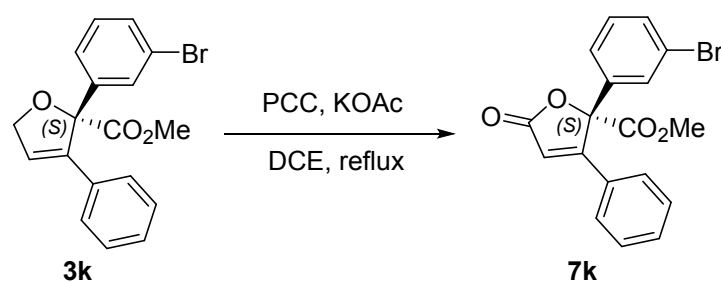

**Scheme S8** preparation of lactone **7k**

**Procedure for PCC oxidation of 2,5-dihydrofuran (S)-**3k**:**<sup>3</sup> To a 20 mL flask, (S)-**3k** (0.2 mmol) was added. Then PCC (0.4 mmol, 2.0 equiv) dissolved in DCE and KOAc (0.4 mmol, 2.0 equiv) were added. After refluxing for 2 h, the reaction was cooled to 25°C and quenched with saturated NH<sub>4</sub>Cl. The aqueous phase was extracted with ethyl acetate 3 times. The combined organic phase was dried with anhydrous Na<sub>2</sub>SO<sub>4</sub>. The solvent was removed with vacuum rotator, affording the crude product. Then the crude product was purified by flash chromatography on silica gel (PE/EA = 10:1~5:1) to give the pure product **7k**.

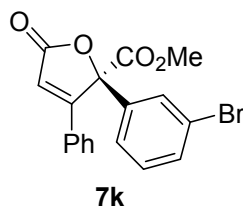

**7k**: white solid, yield 65%; 91% ee, determined by HPLC (Daicel Chirapak IA, flow rate: 1.0 mL/min; hexane / isopropanol = 80 : 1; 254 nm; Retention time:  $t_{\text{major}} = 41.04$  min,  $t_{\text{minor}} = 38.26$  min);  $^1\text{H}$  NMR(400 MHz,  $\text{CDCl}_3$ ):  $\delta$  7.53 (d,  $J = 1.8$  Hz, 2H), 7.46 (t,  $J = 7.4$  Hz, 3H), 7.41 – 7.33 (m, 2H), 7.28 (d,  $J = 7.8$  Hz, 1H), 7.23 (t,  $J = 8.1$  Hz, 1H), 6.62 (s, 1H), 3.83 (s, 3H).  $^{13}\text{C}$  NMR (100 MHz,  $\text{CDCl}_3$ ):  $\delta$  170.60, 167.58, 164.64, 136.69, 132.87, 131.66, 131.11, 130.14, 128.94, 128.64, 126.64, 122.69, 122.26, 116.67, 89.98, 53.90. HRMS: calcd 394.9895 for  $\text{C}_{18}\text{H}_{13}\text{BrO}_4\text{Na}[\text{M}+\text{Na}]^+$ , found 394.9881.

### G. Reference

- (a) Liang, Y.; Xie, Y.; Li, J. Modified palladium-catalyzed Sonogashira cross-coupling reactions under copper-, amine-, and solvent-free conditions. *Adv. Synth. Catal.* **2006**, *348*, 545 – 550. (b) Kleinbeck, F.; Toste, F. D. Gold (I)-catalyzed enantioselective ring expansion of allenylcyclopropanols. *J. Am. Chem. Soc.*, **2009**, *131*, 9178–917.
- (a) Starmans, W. A. J.; Thijs, L.; Zwanenburg, B. Novel chiral dirhodium catalysts derived from aziridine and azetidine carboxylic acid for intermolecular cyclopropanation reactions with methyl phenyldiazoacetate. *Tetrahedron*, **1998**, *54*, 629-636. (b) Yu, W. Y.; Tsoi, Y. T.; Zhou, Z.; Chan, A. S. C. Palladium-catalyzed cross coupling reaction of benzyl bromides with diazoesters for stereoselective synthesis of (*E*) -  $\alpha$ ,  $\beta$  -diarylacrylates. *Org. Lett.* **2009**, *11*, 469-472.
- Bonadies, F.; Bonini, C. Oxidation of active methylene compounds by pyridinium chlorochromate. *Syn. Comm*, **1988**, *18*, 1573-1580.

### H. <sup>1</sup>H NMR spectra

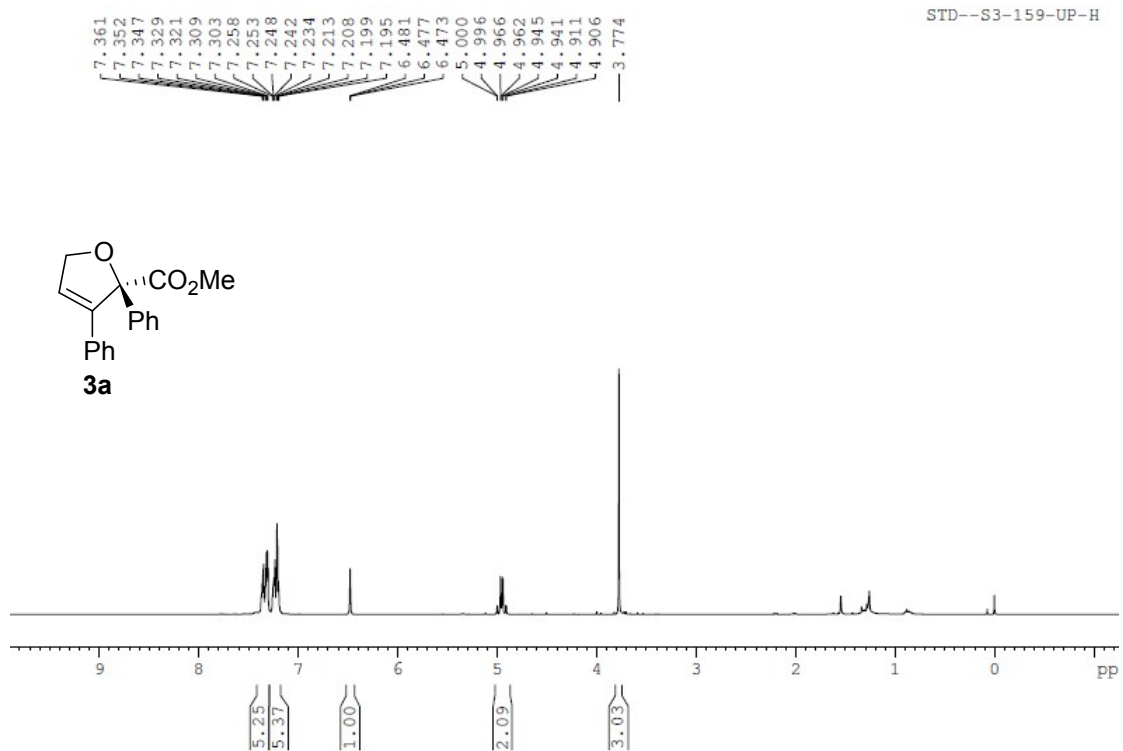

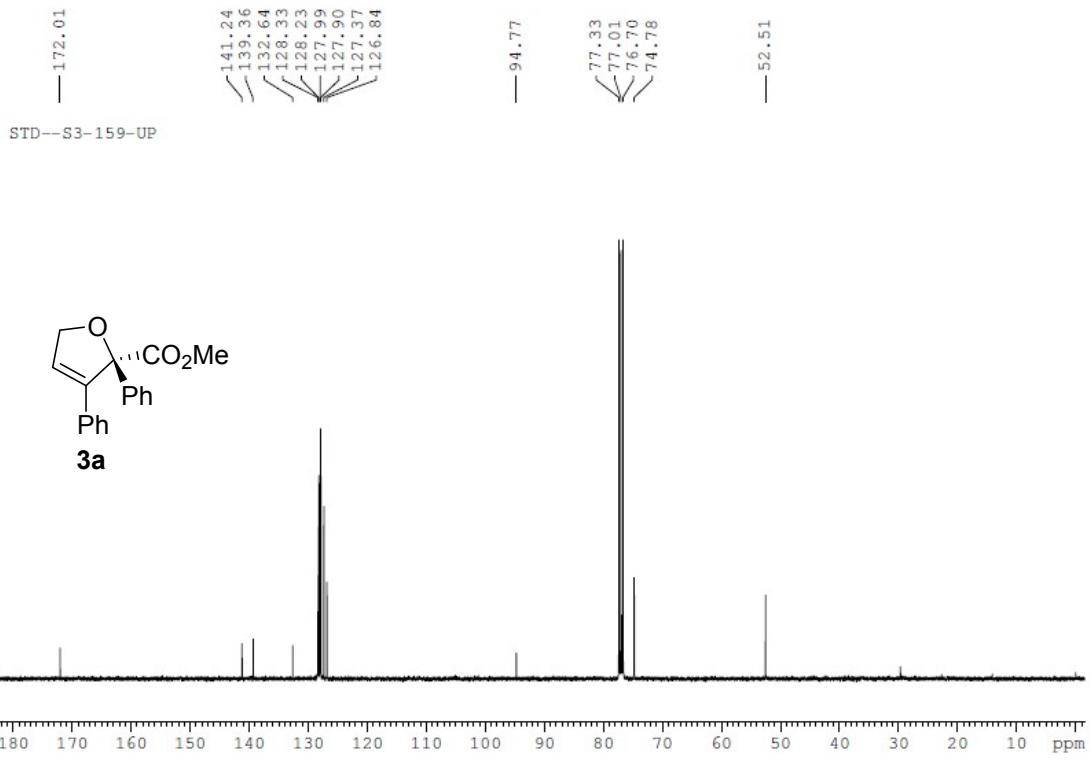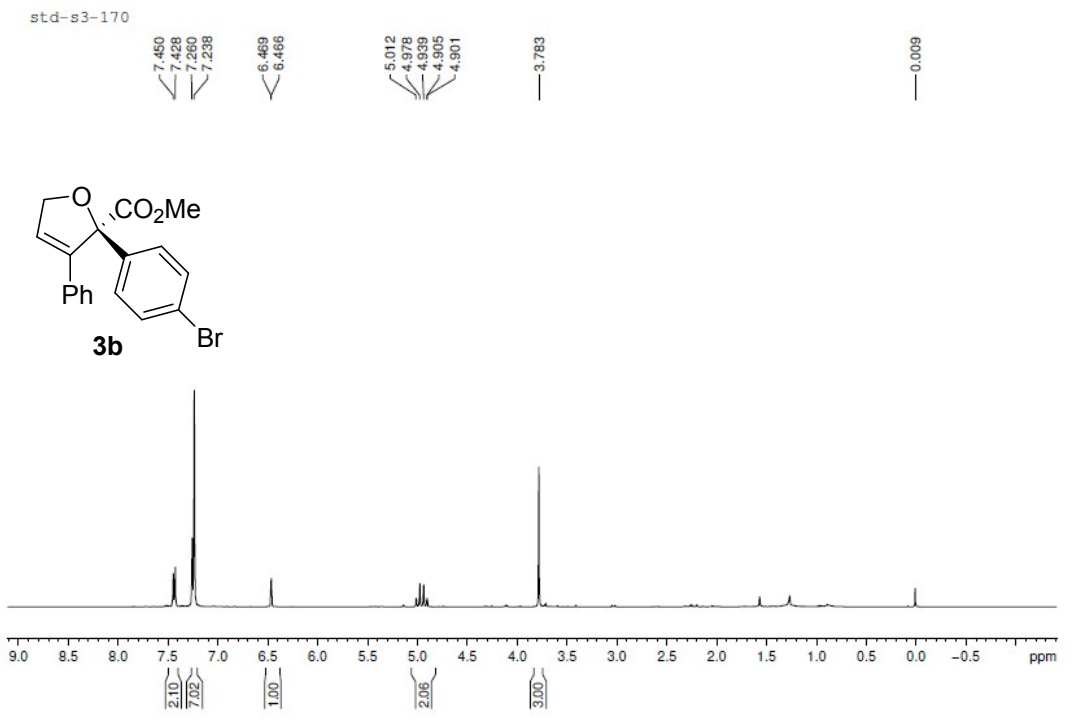

std-s3-170

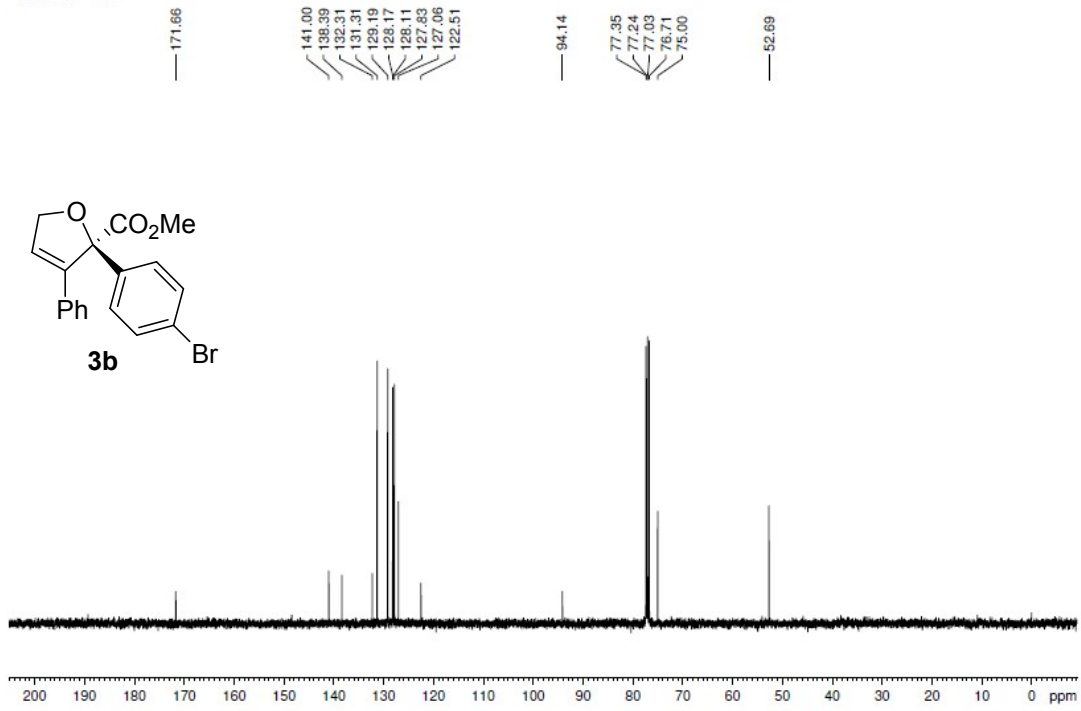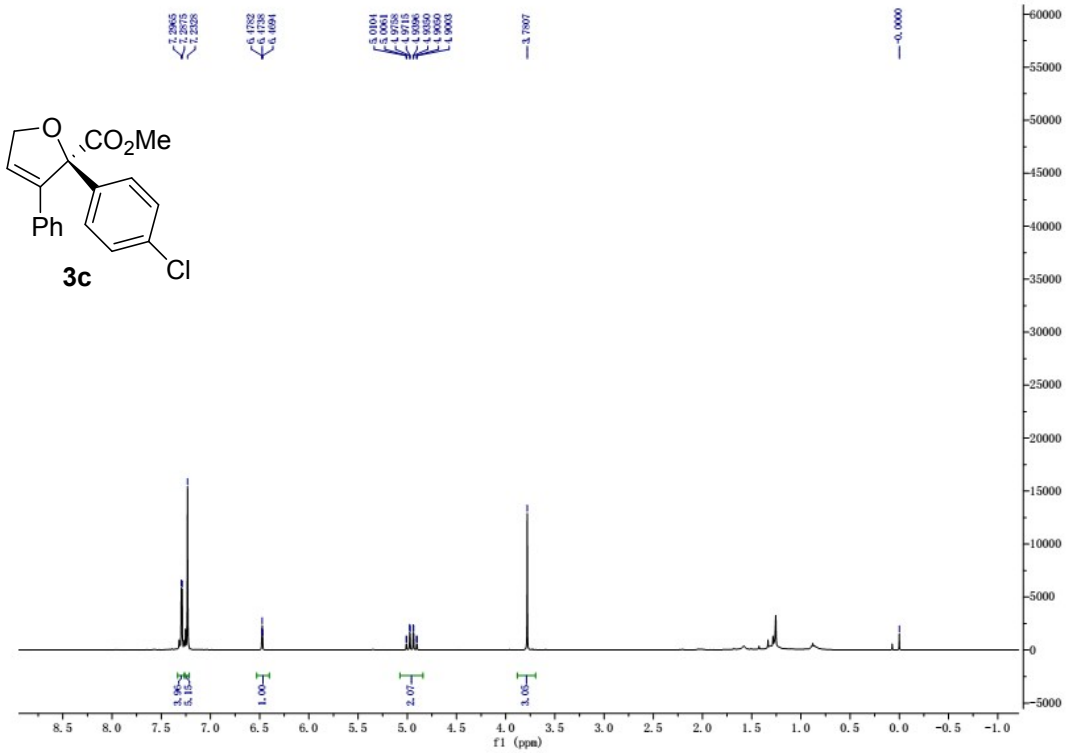

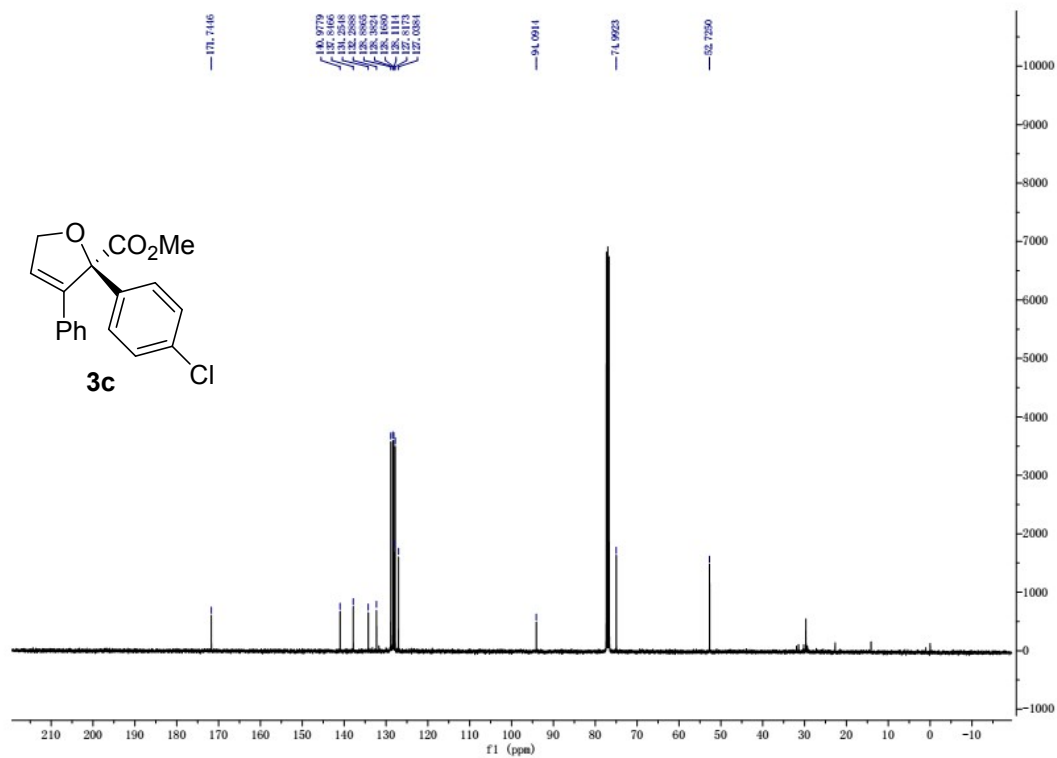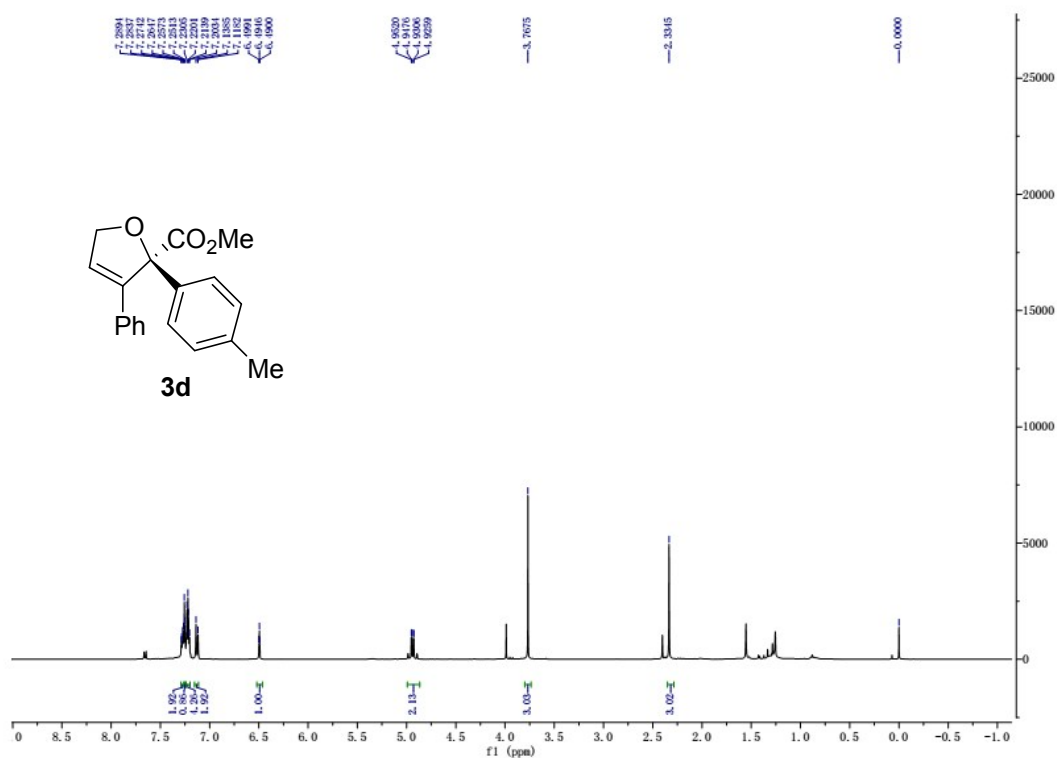

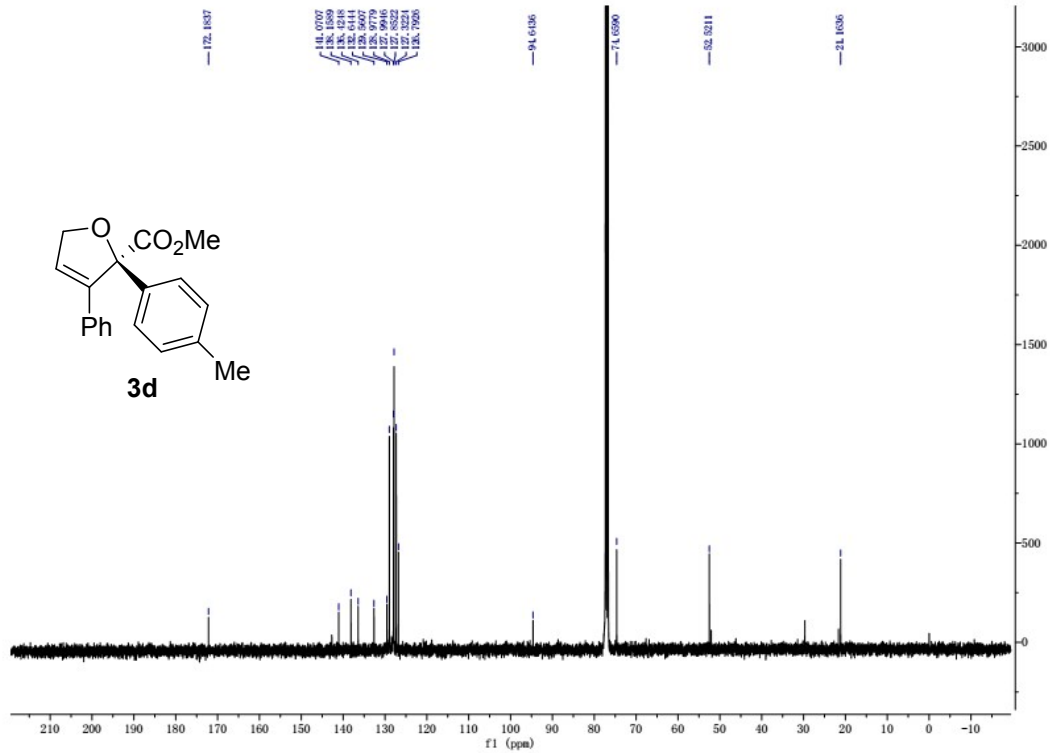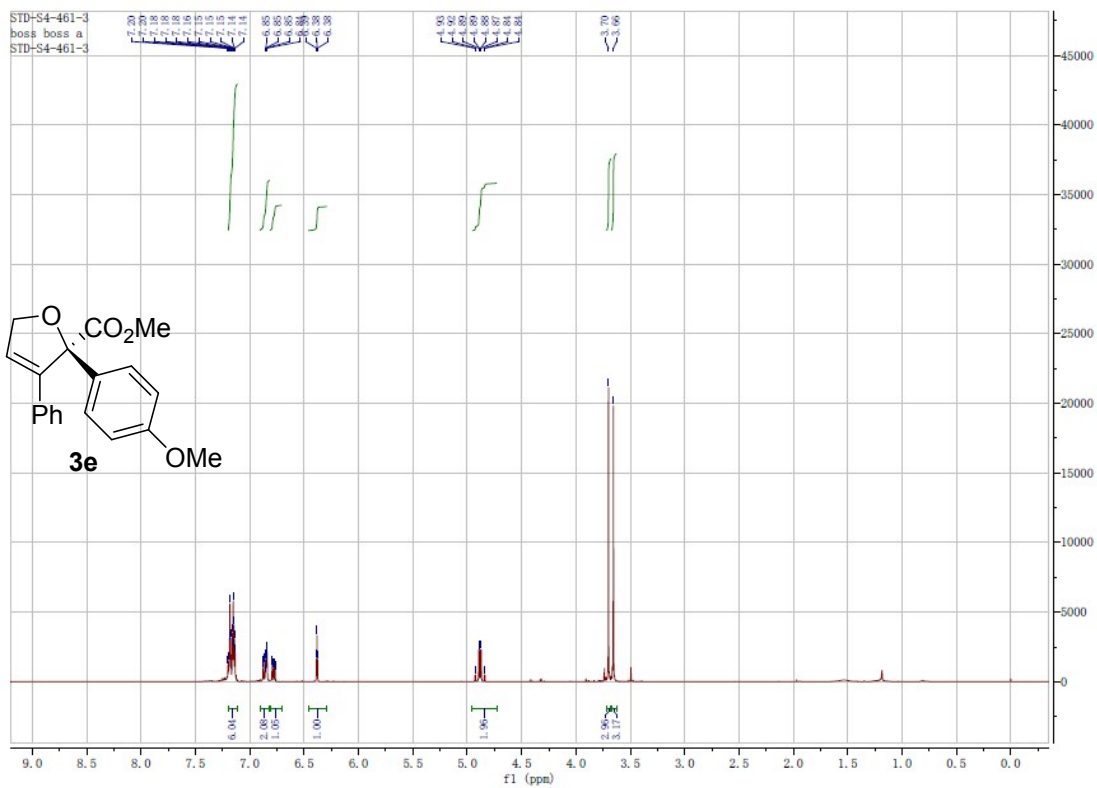



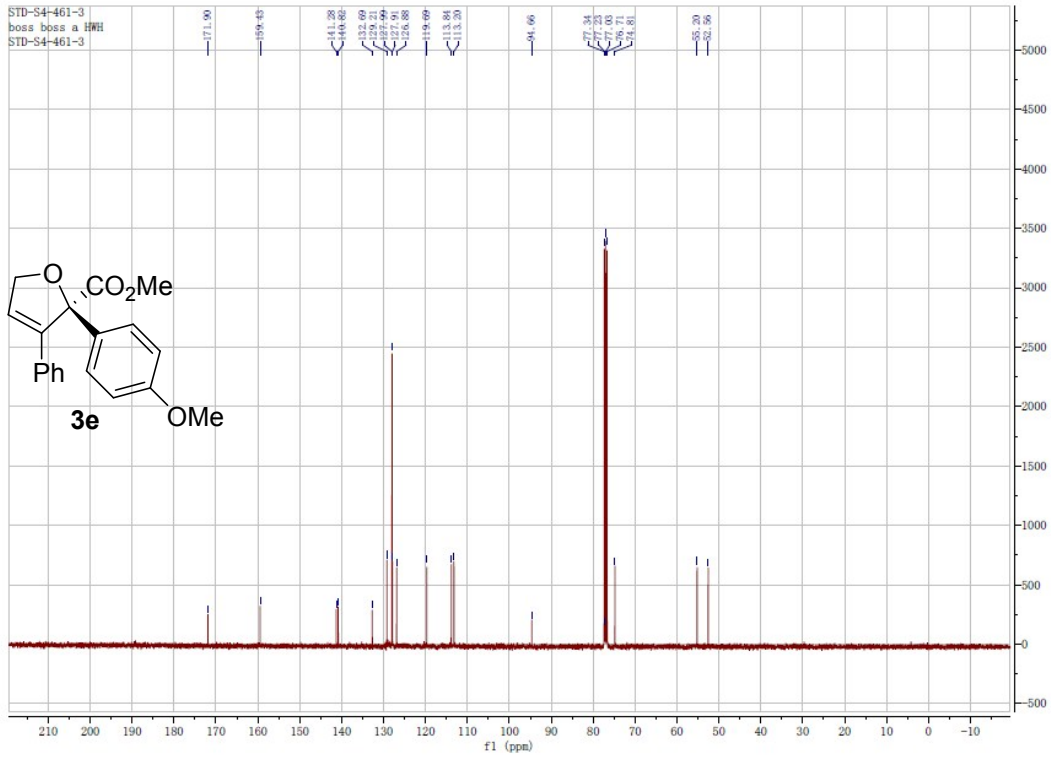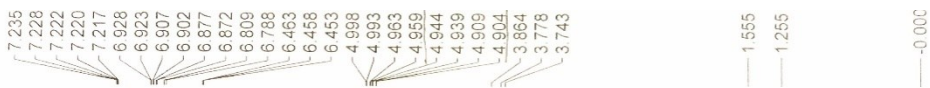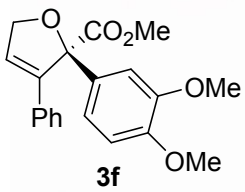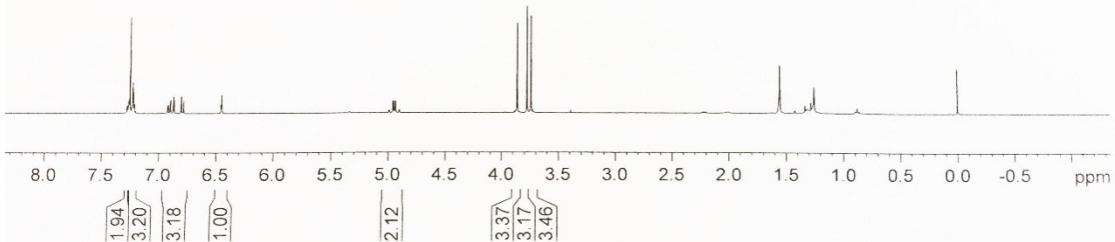

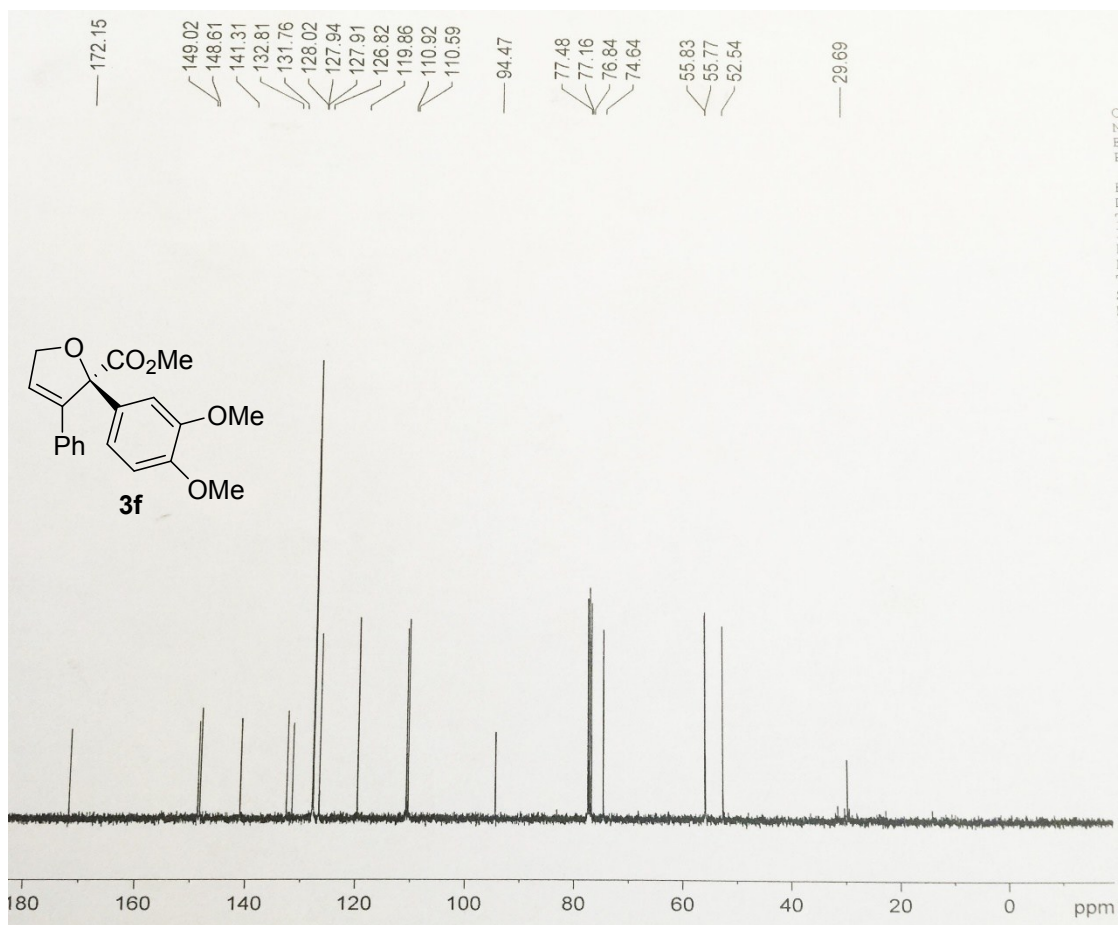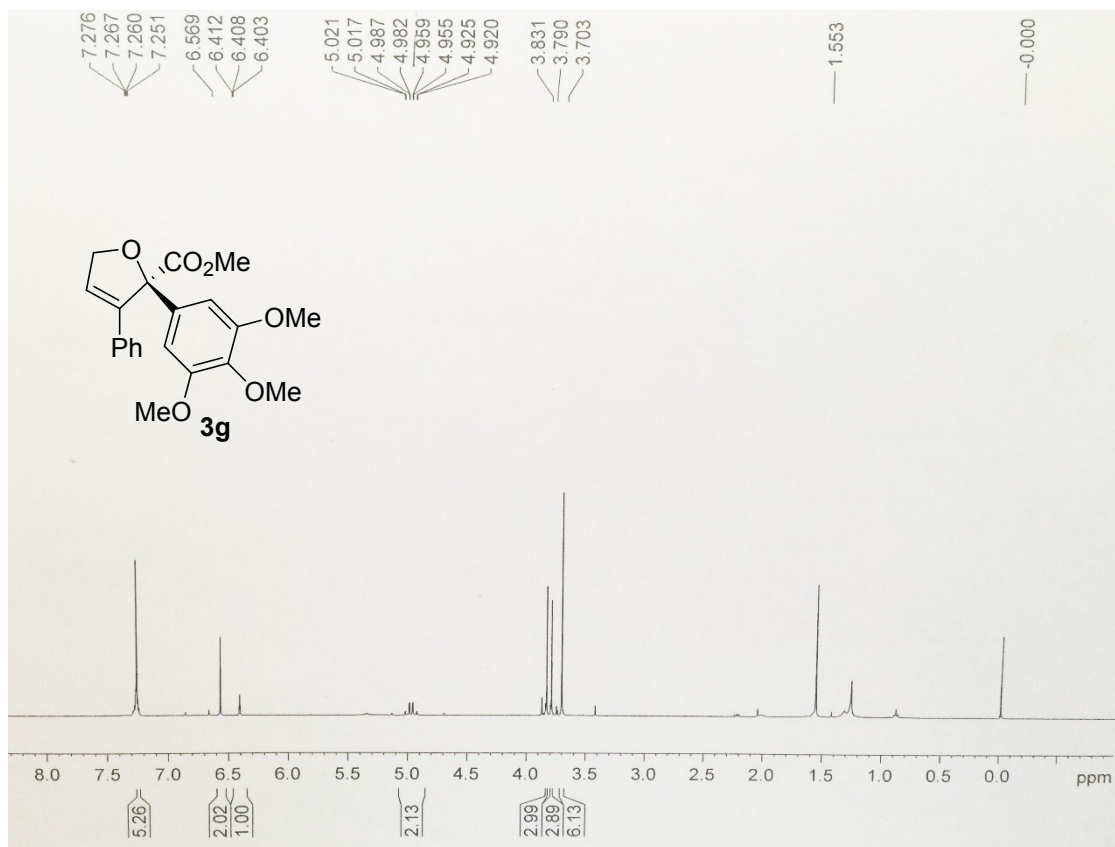

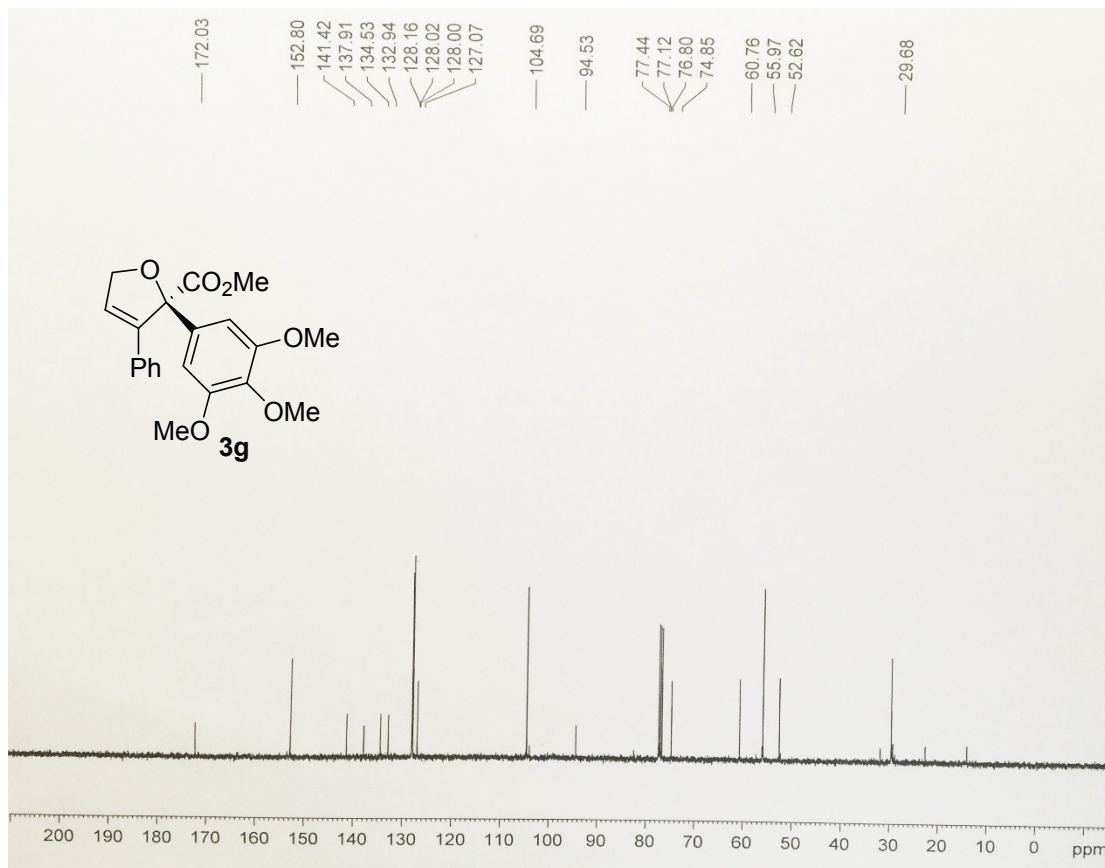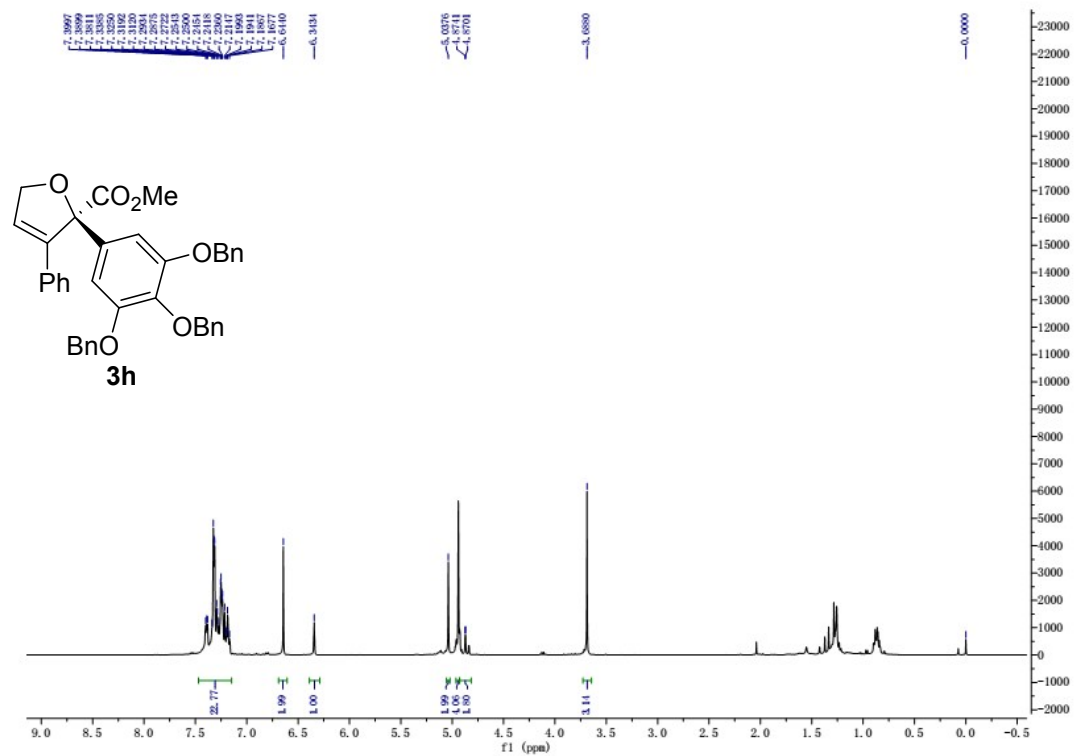

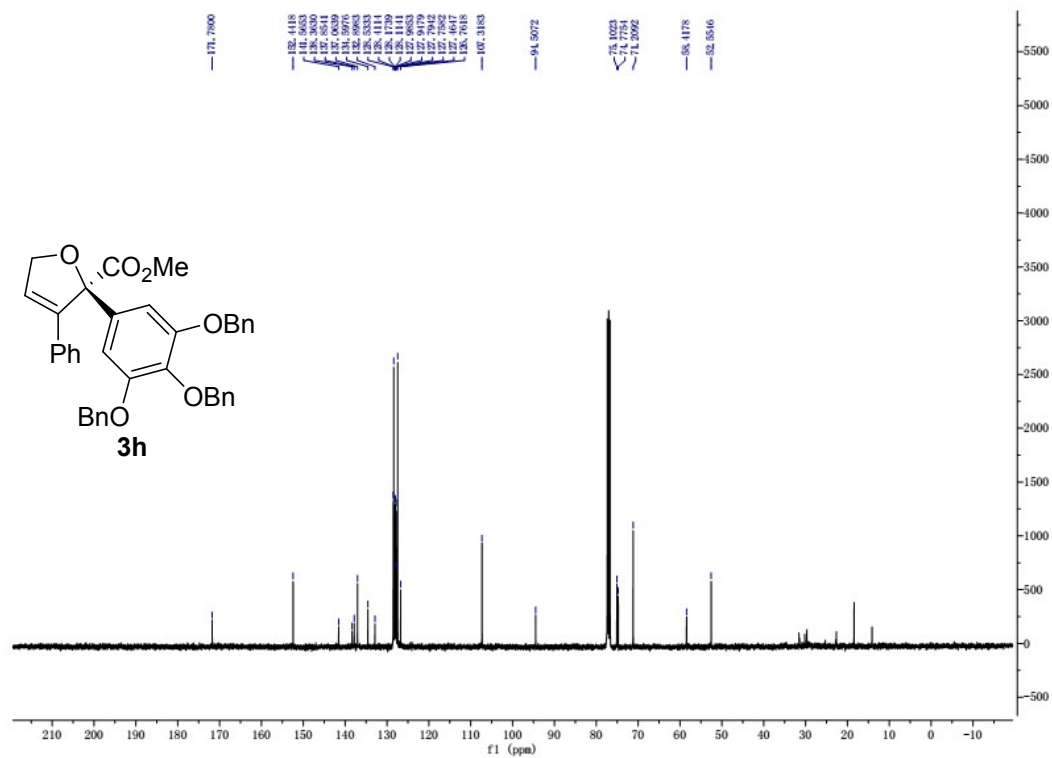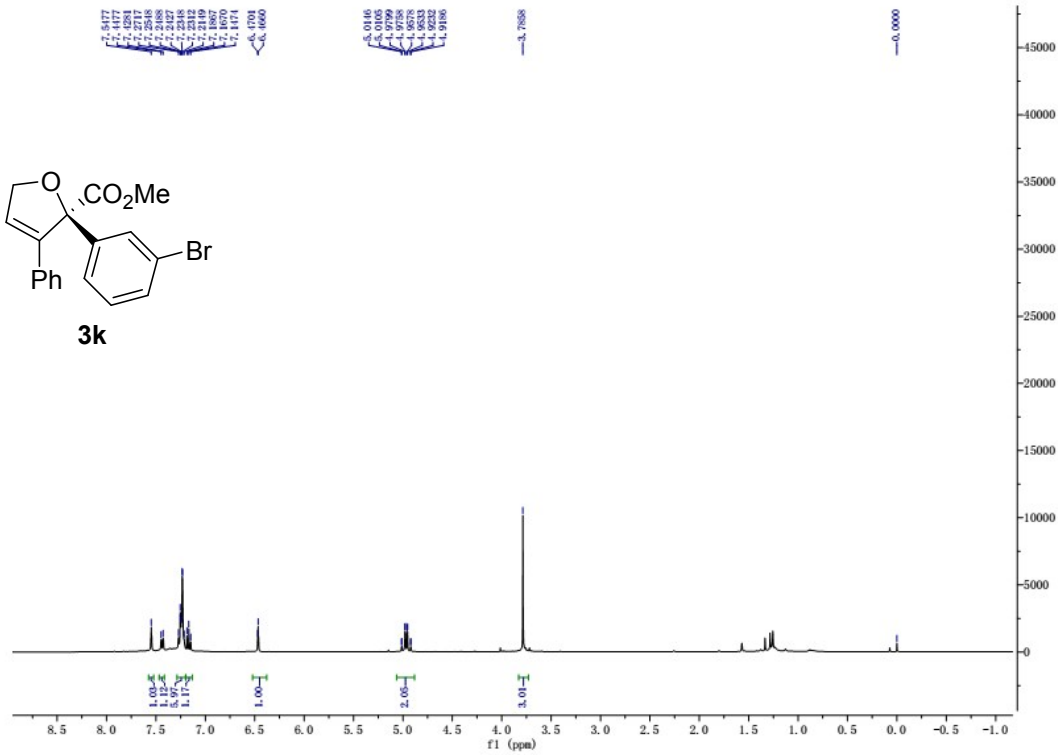

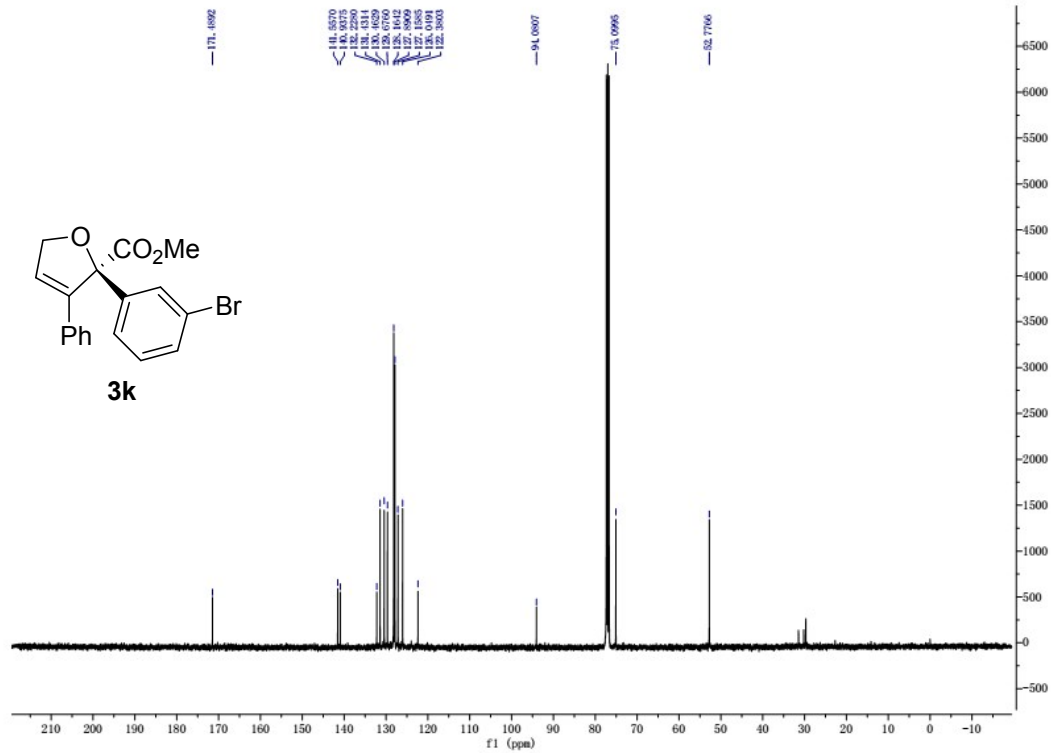

std-s3-173

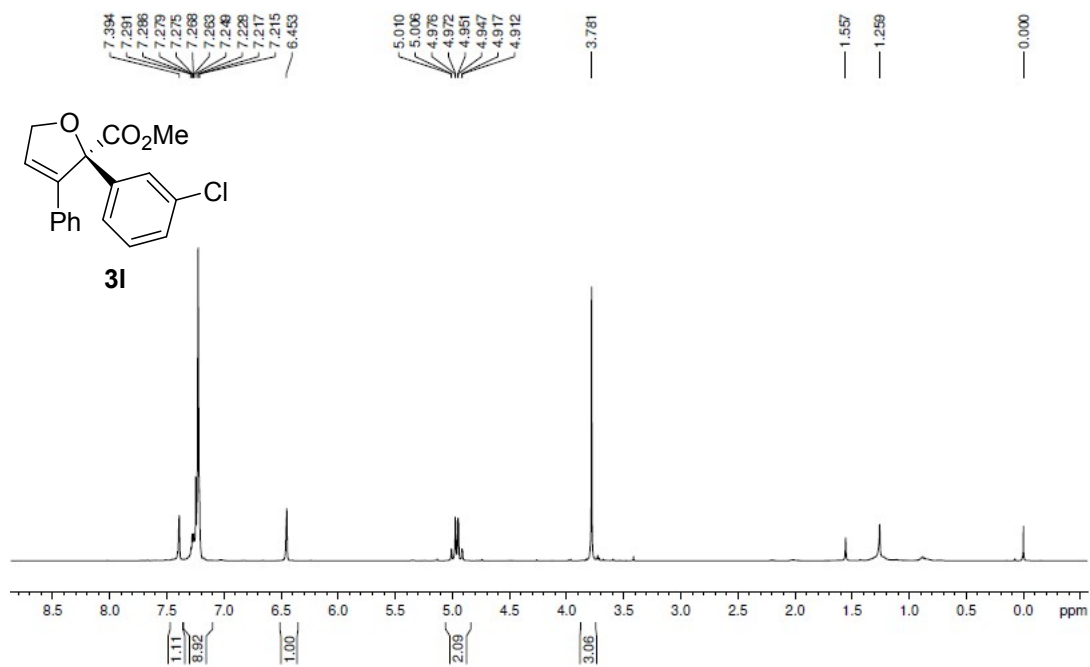

std-s3-173

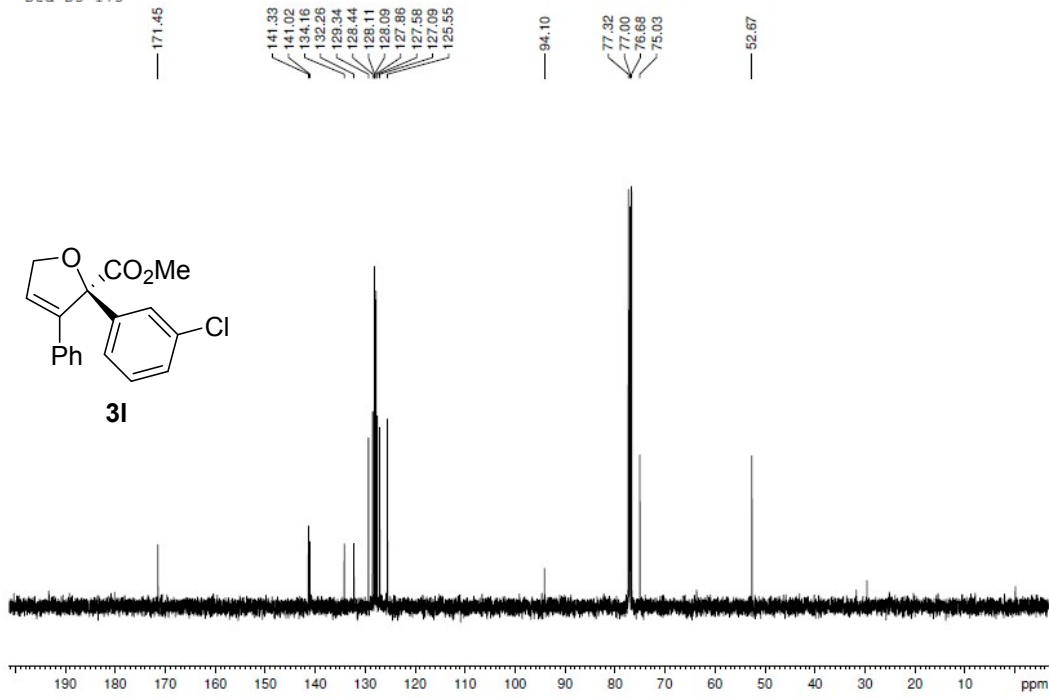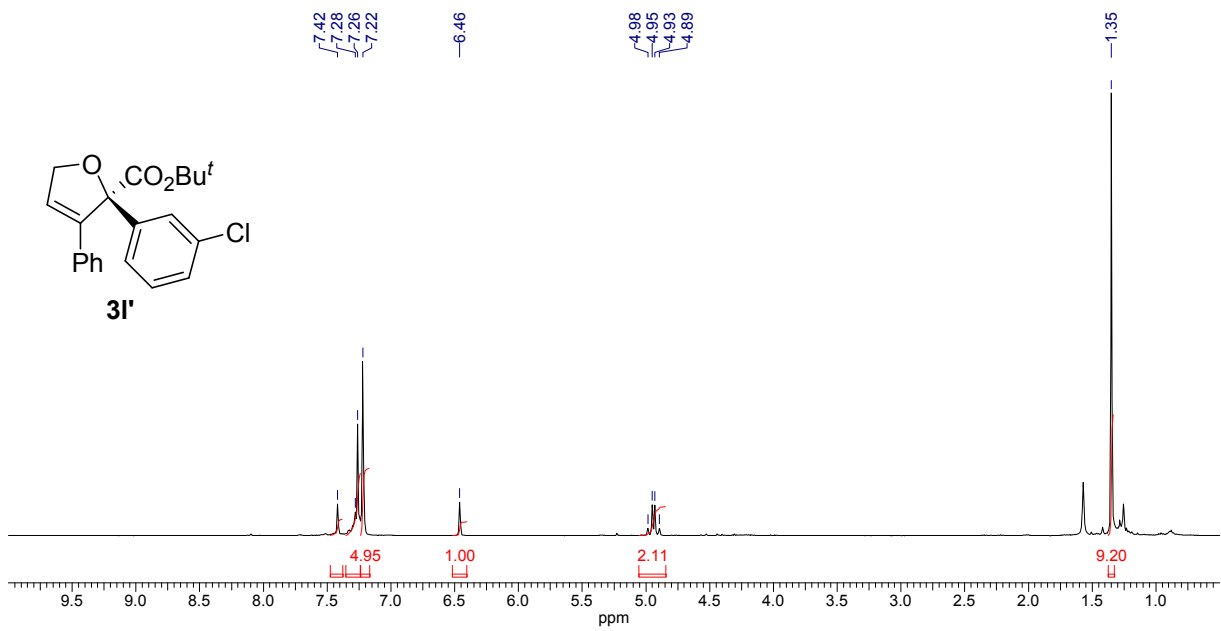

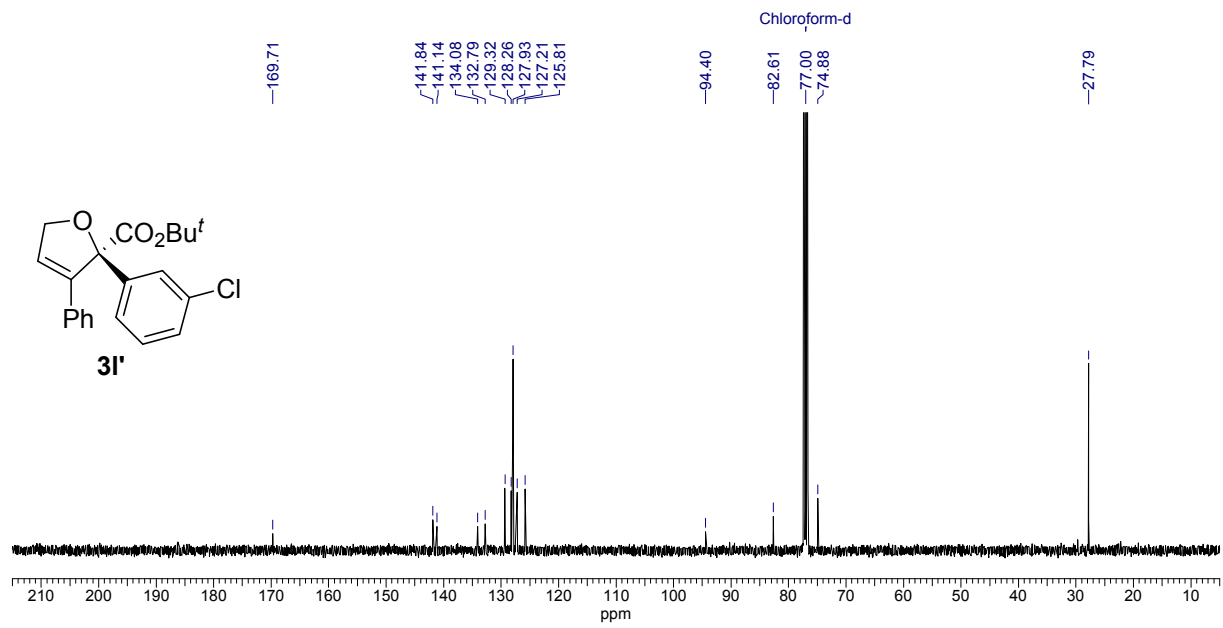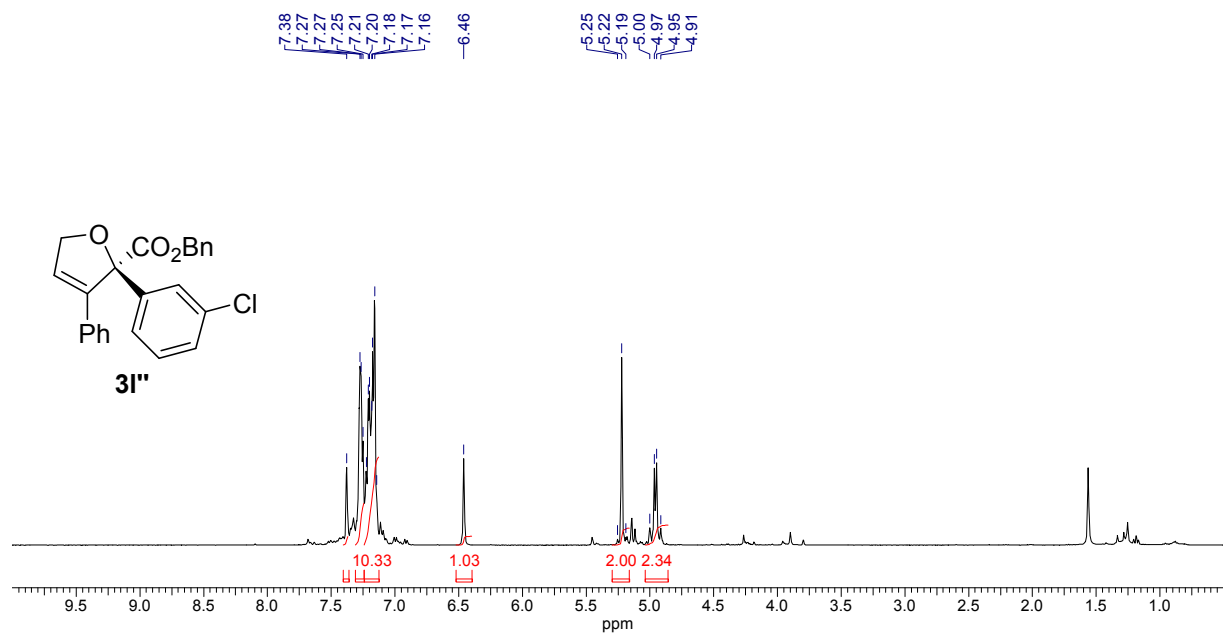

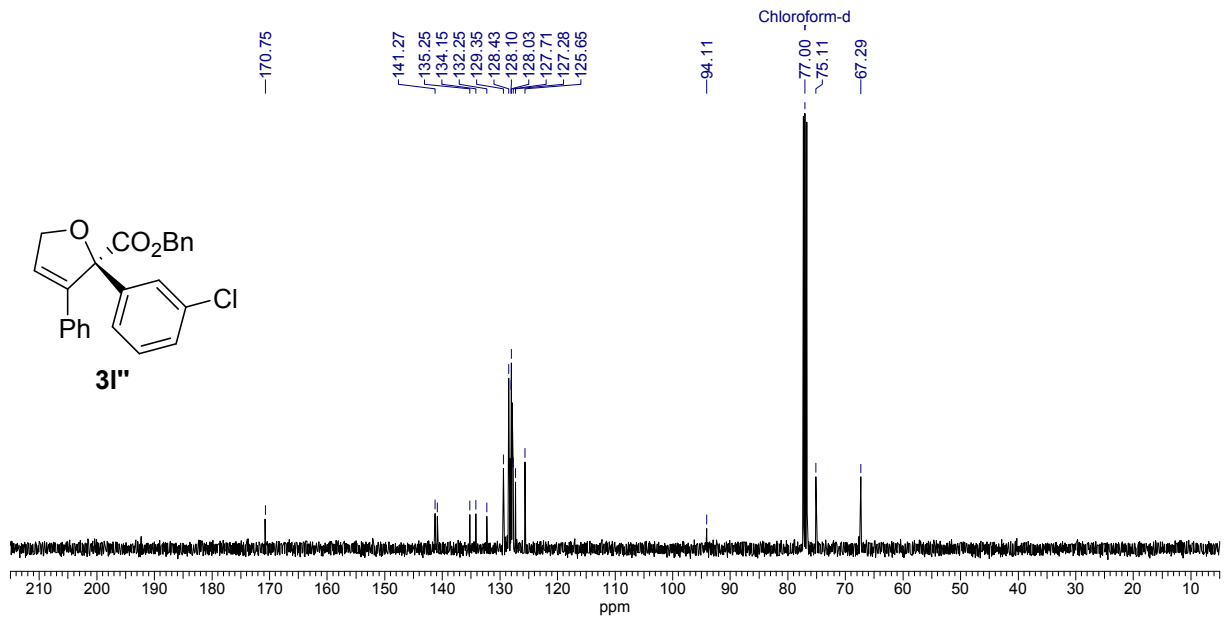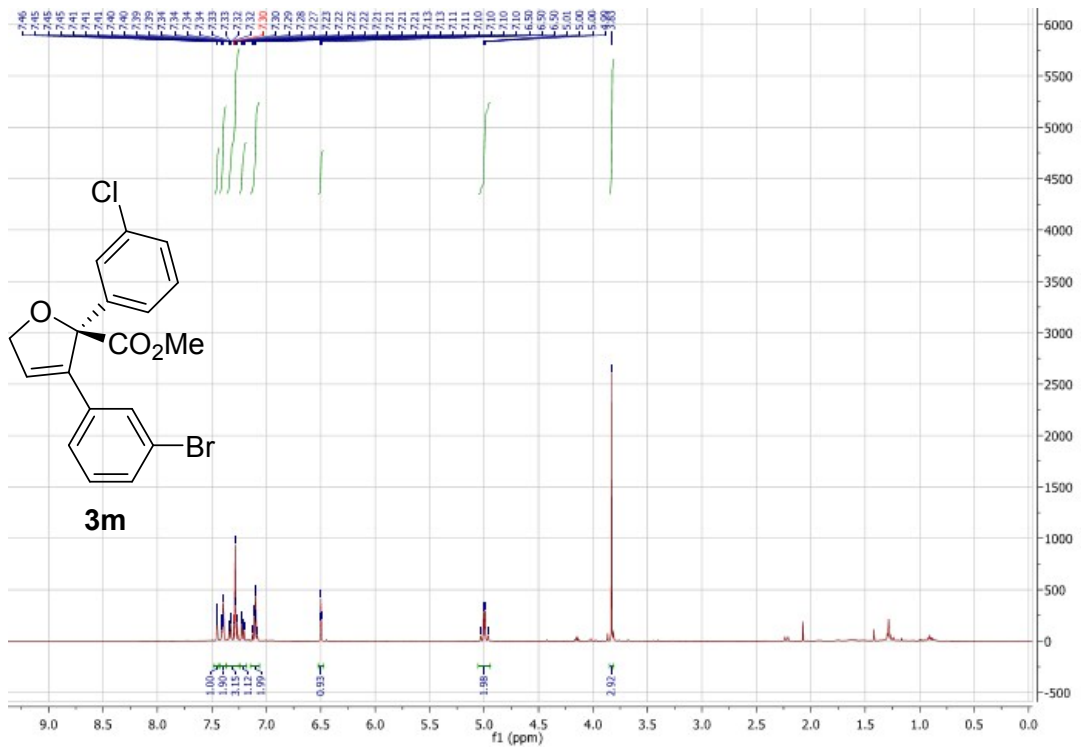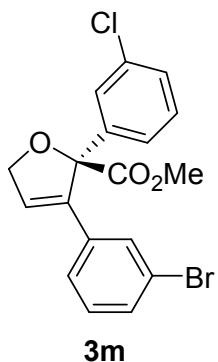



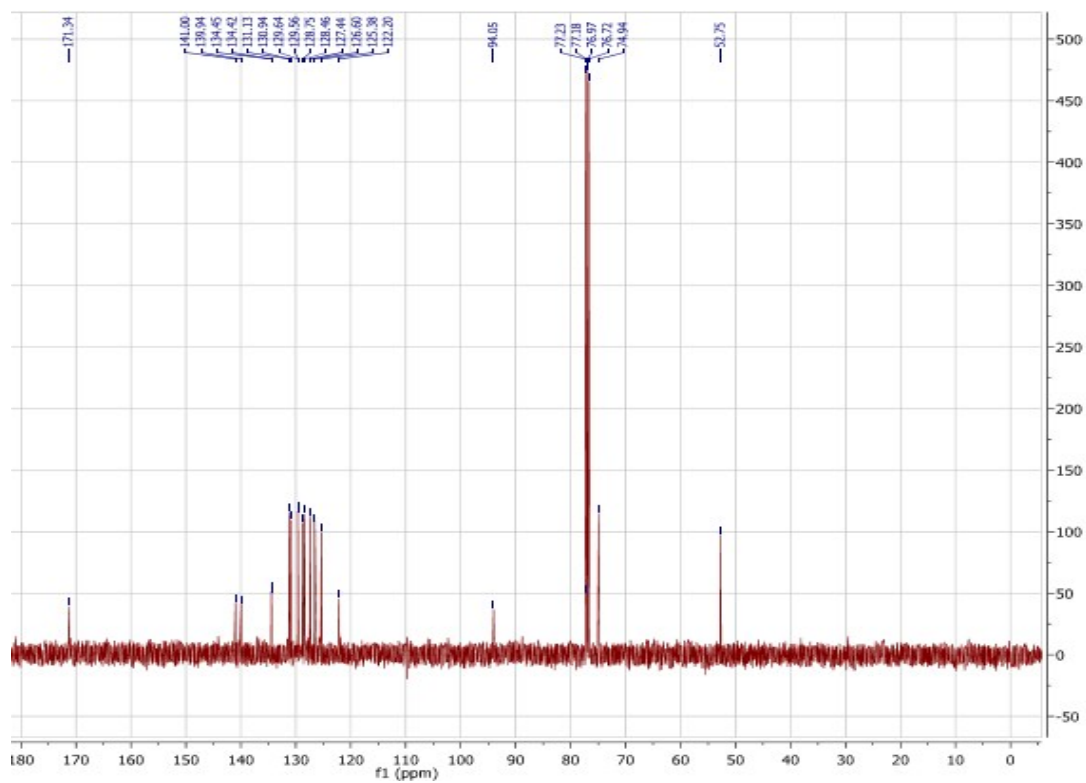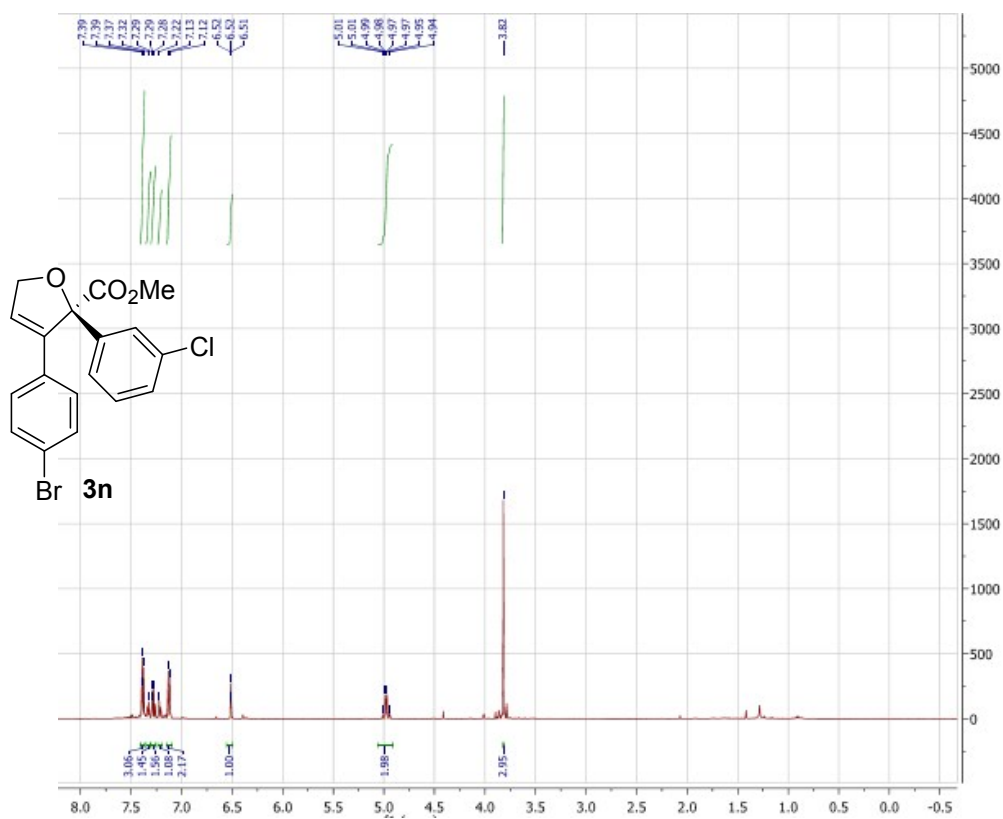

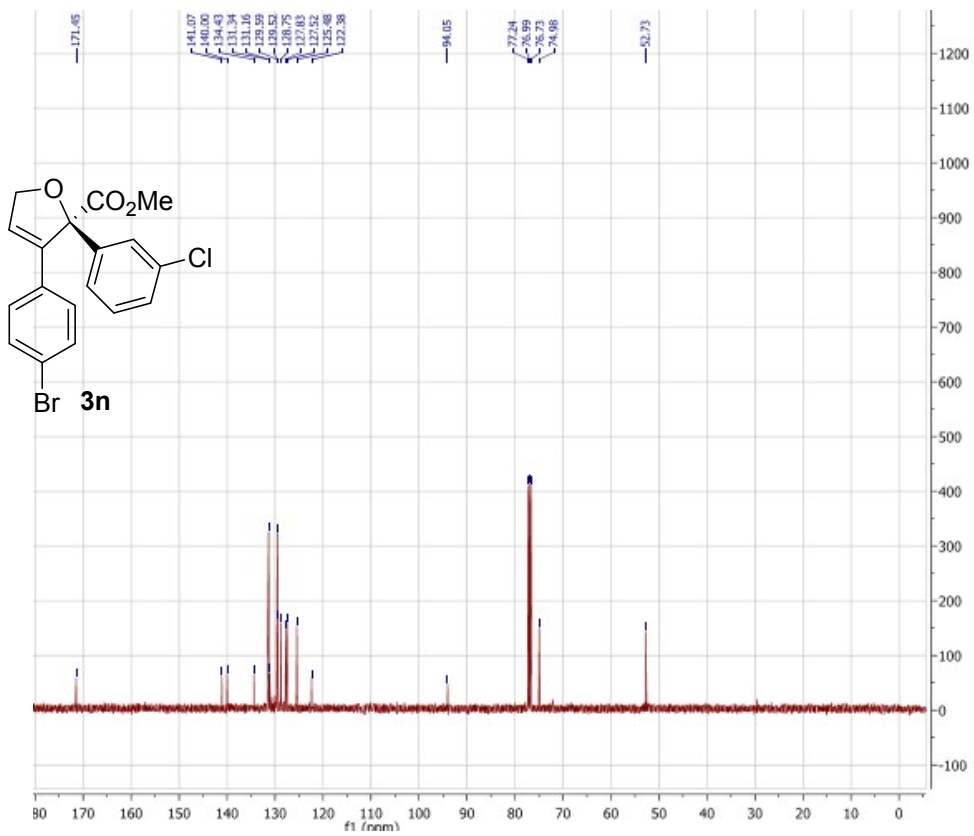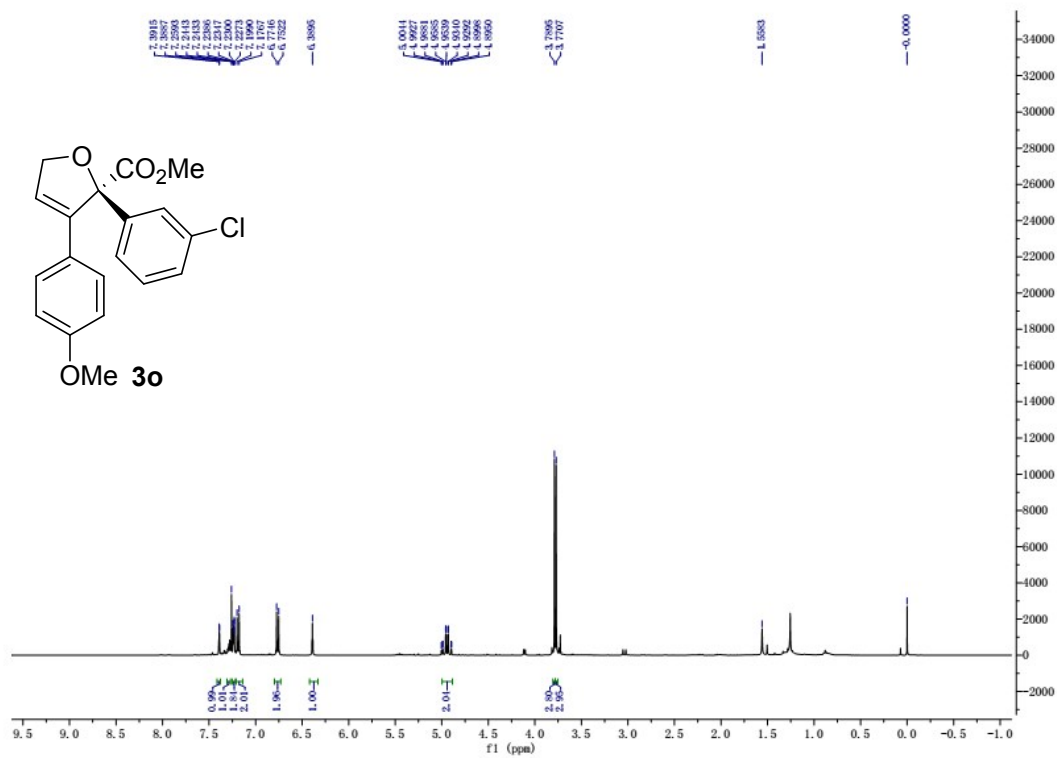

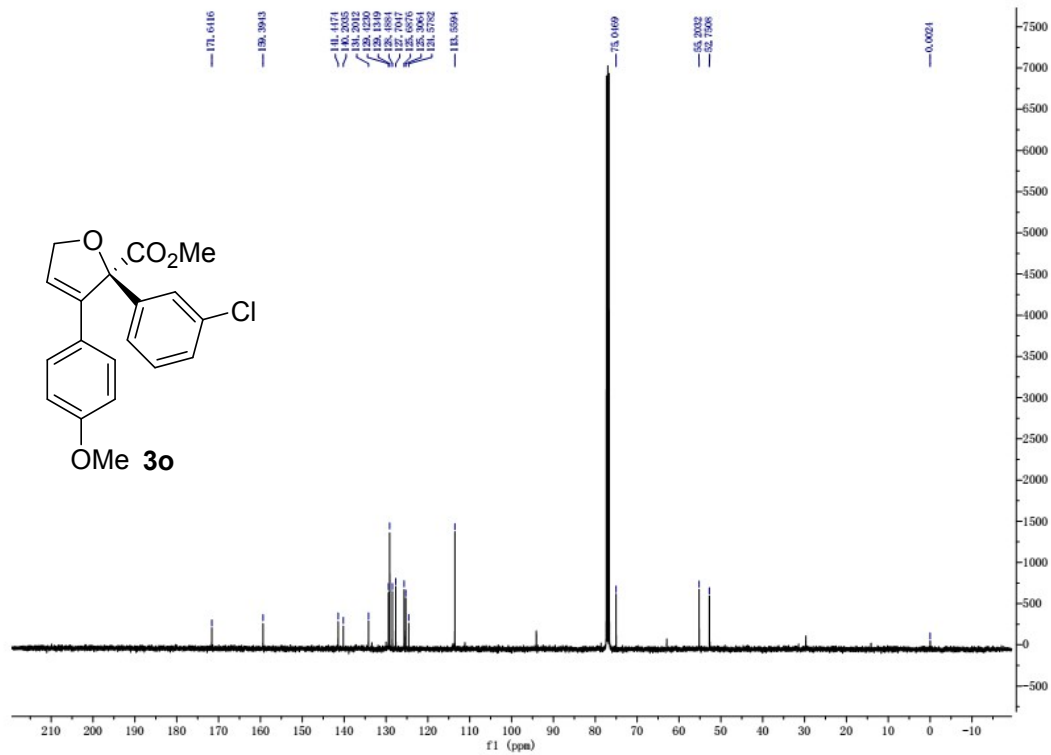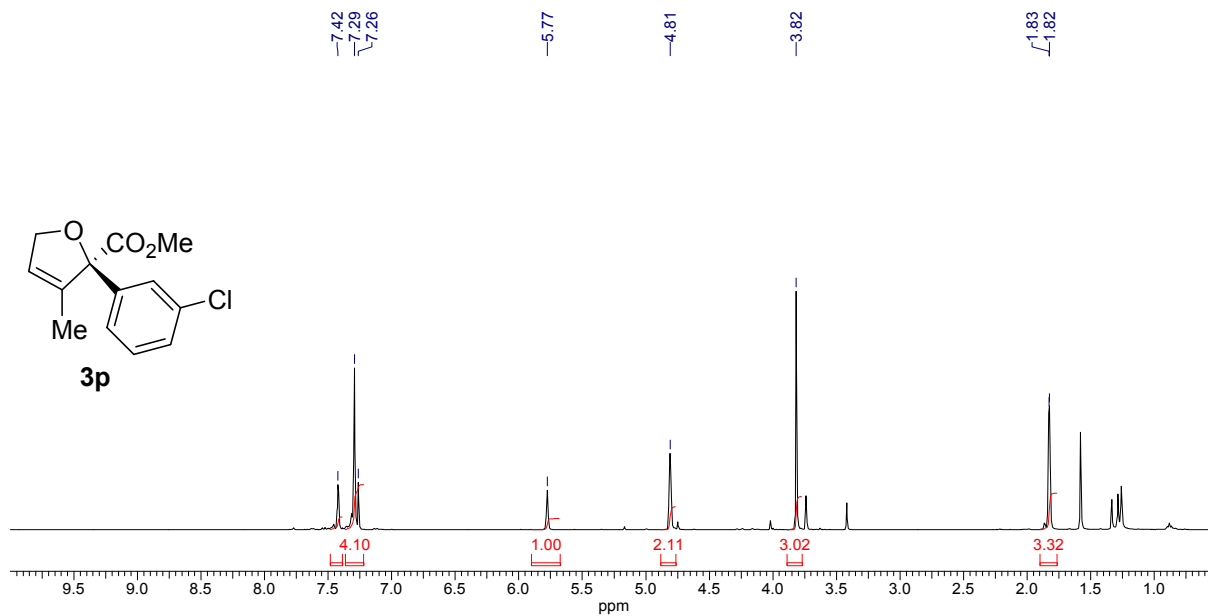

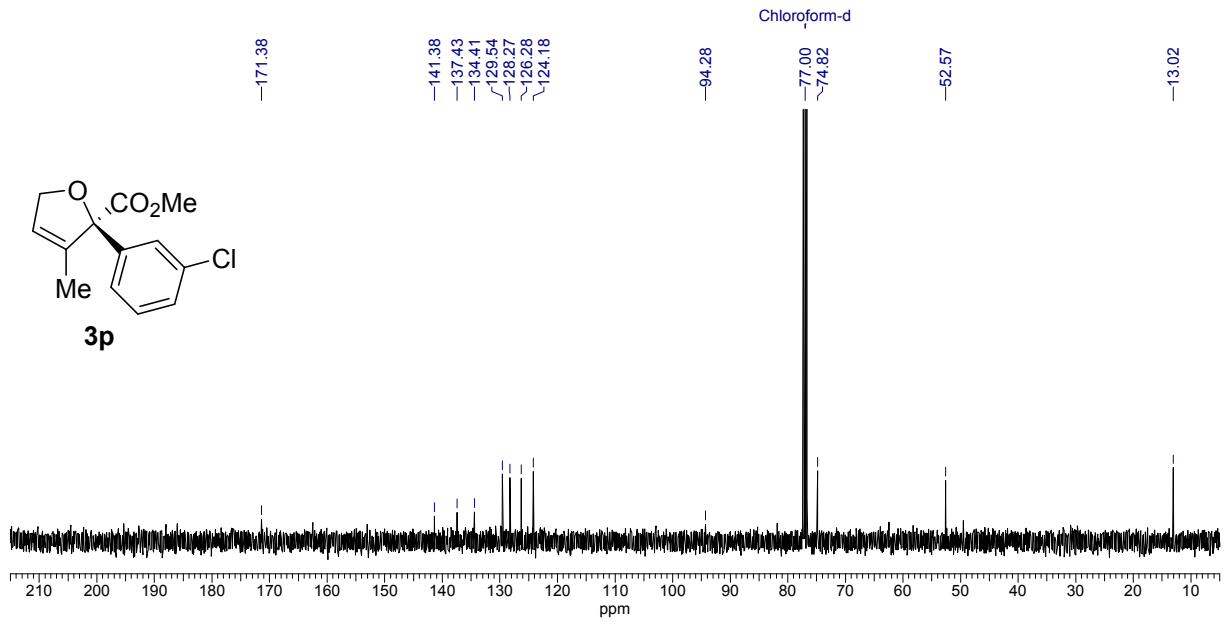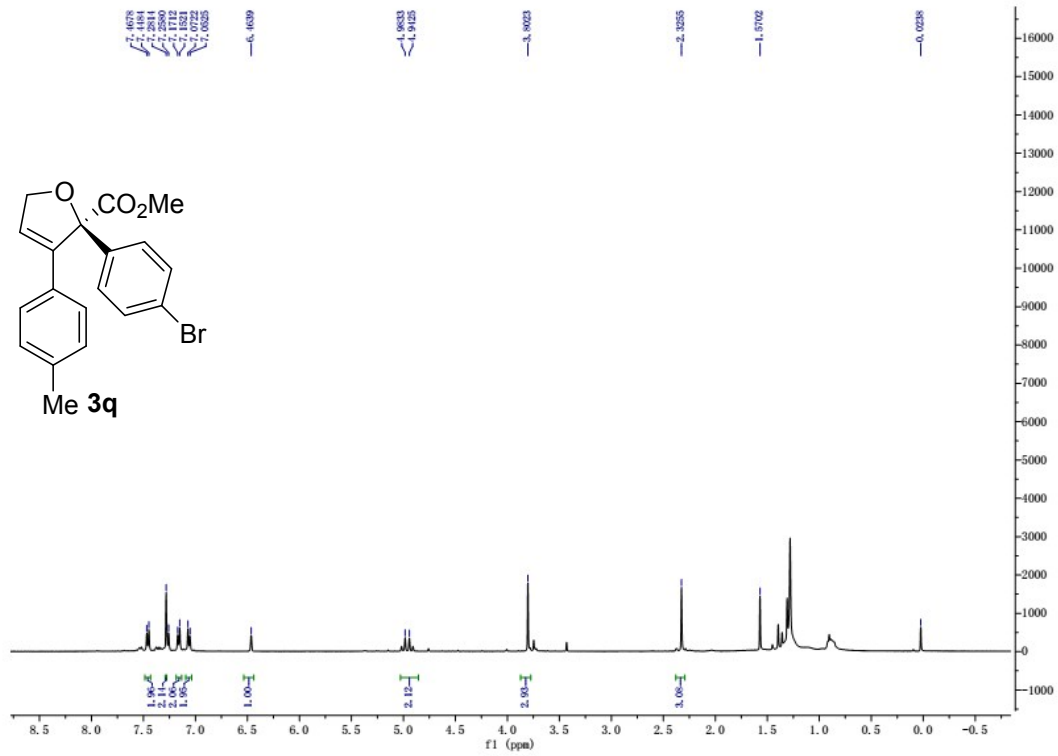

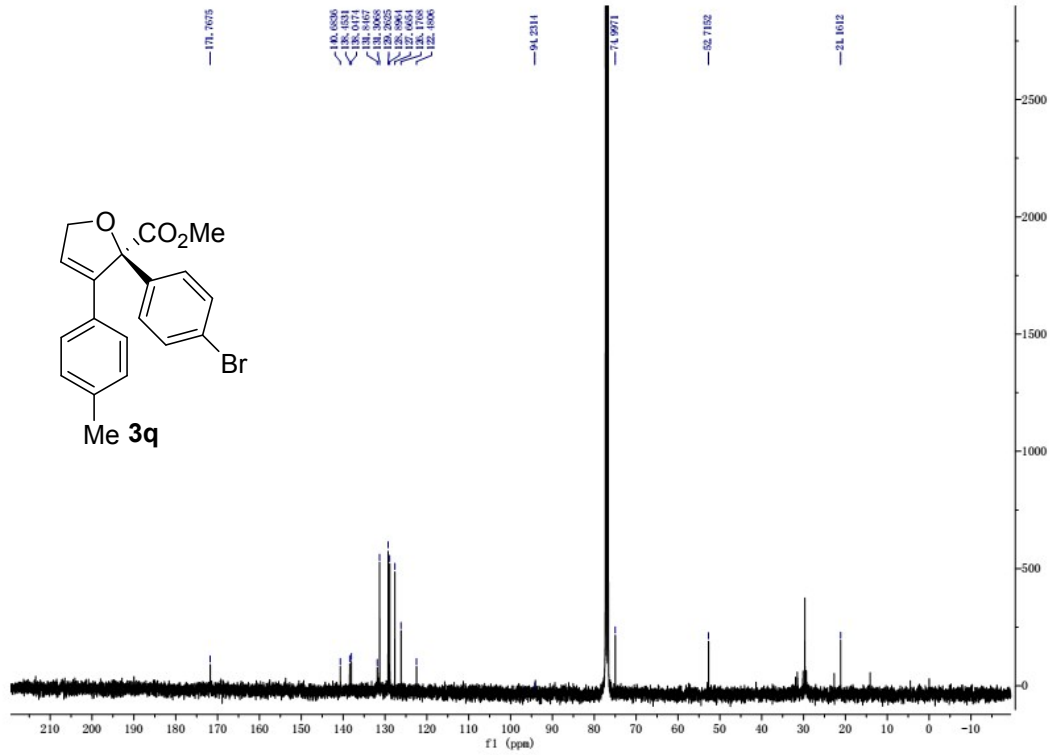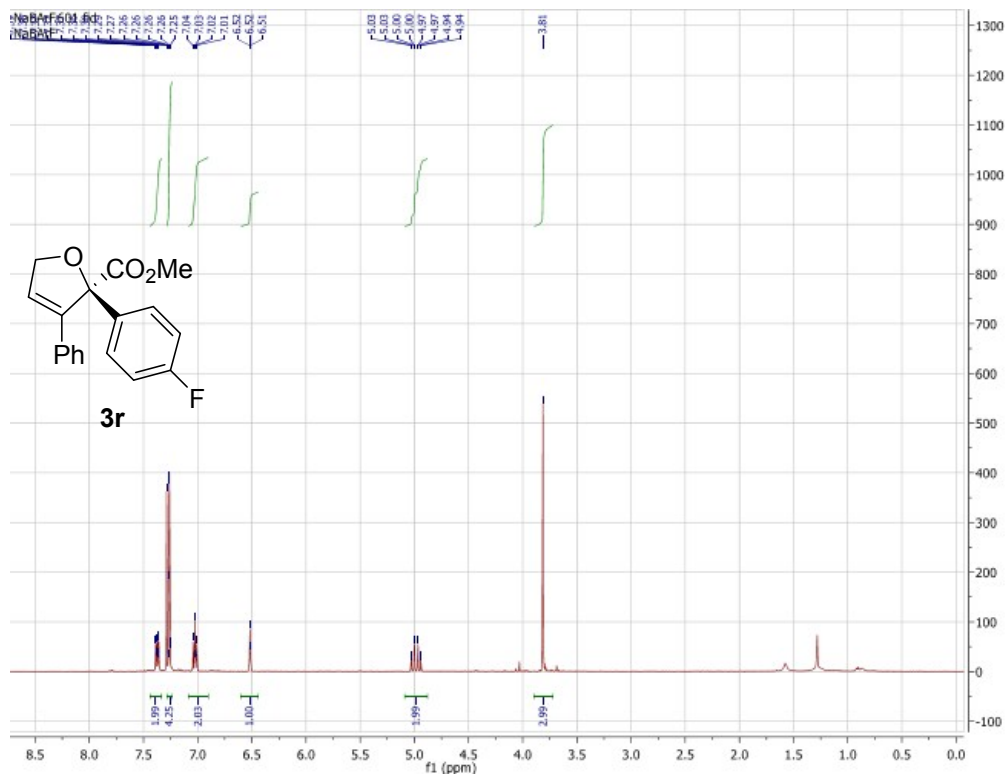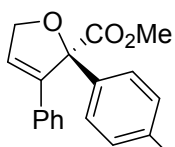

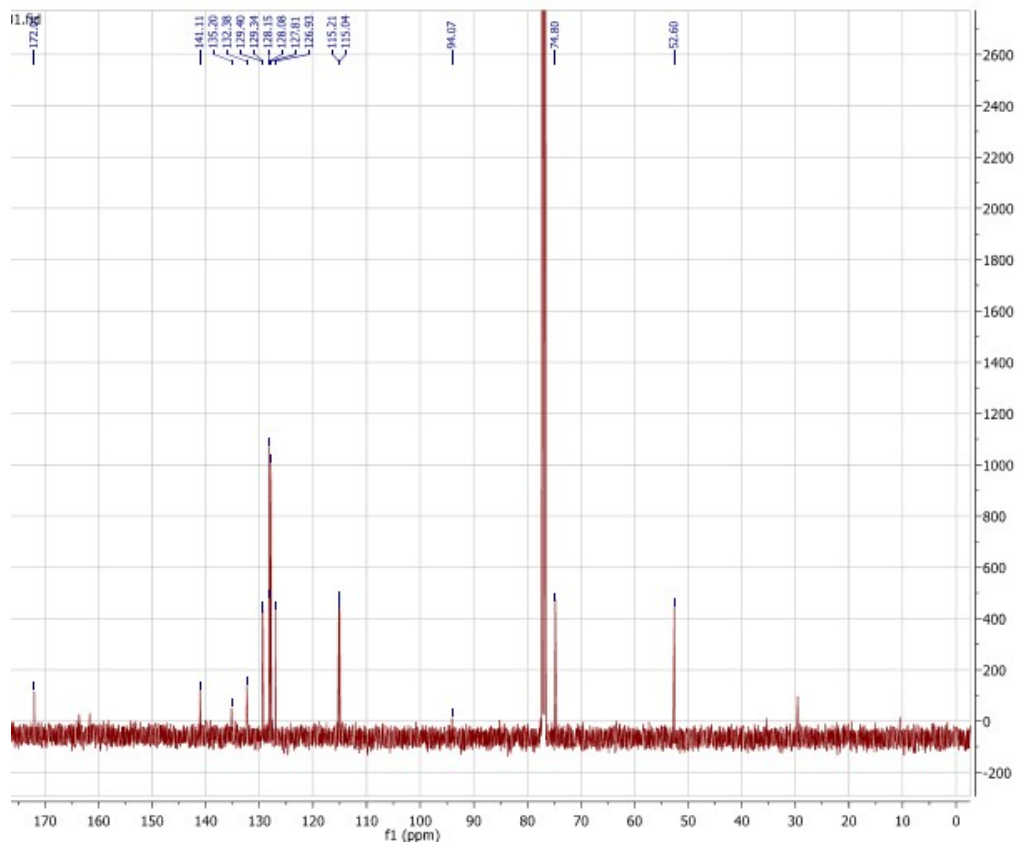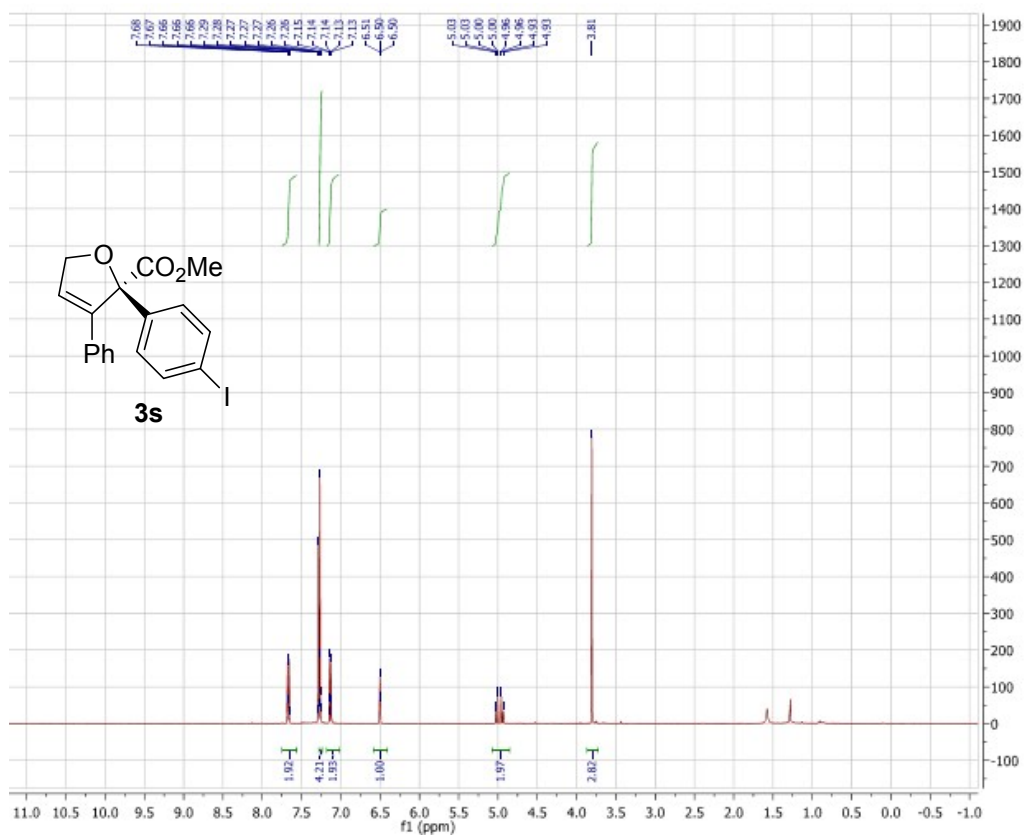

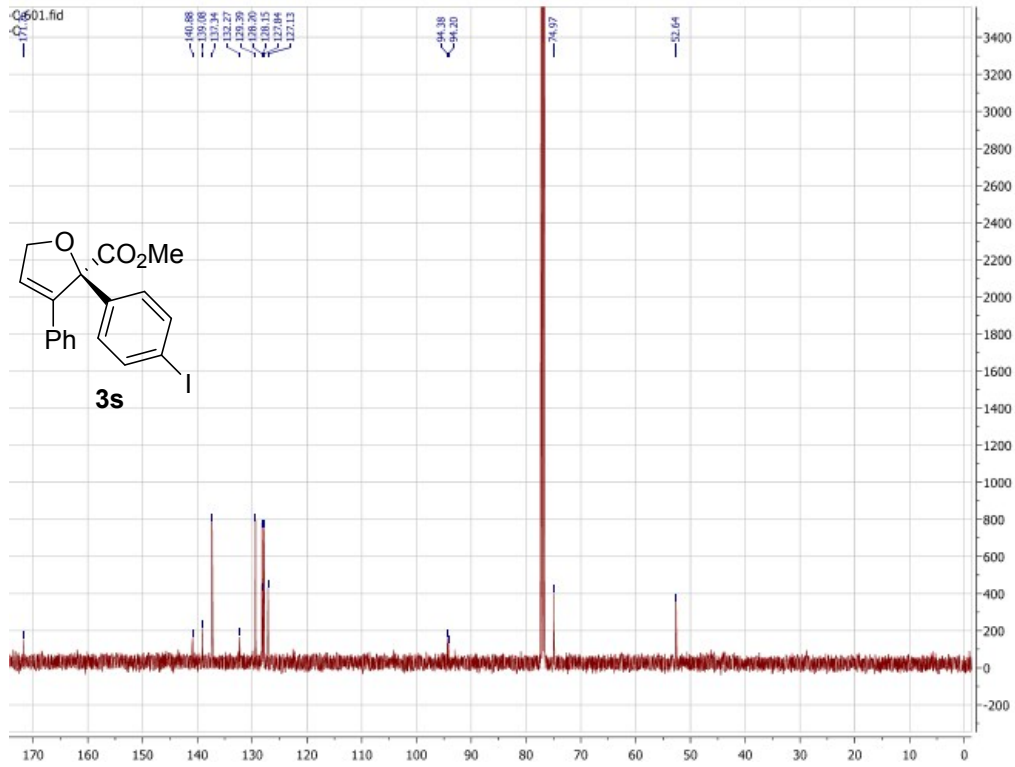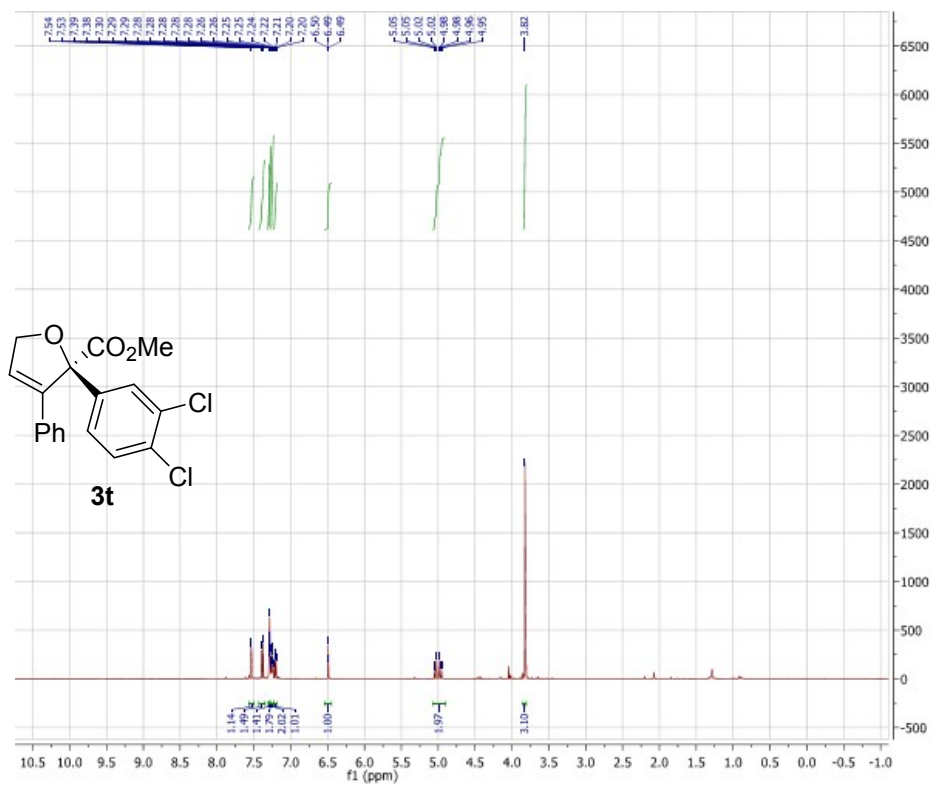

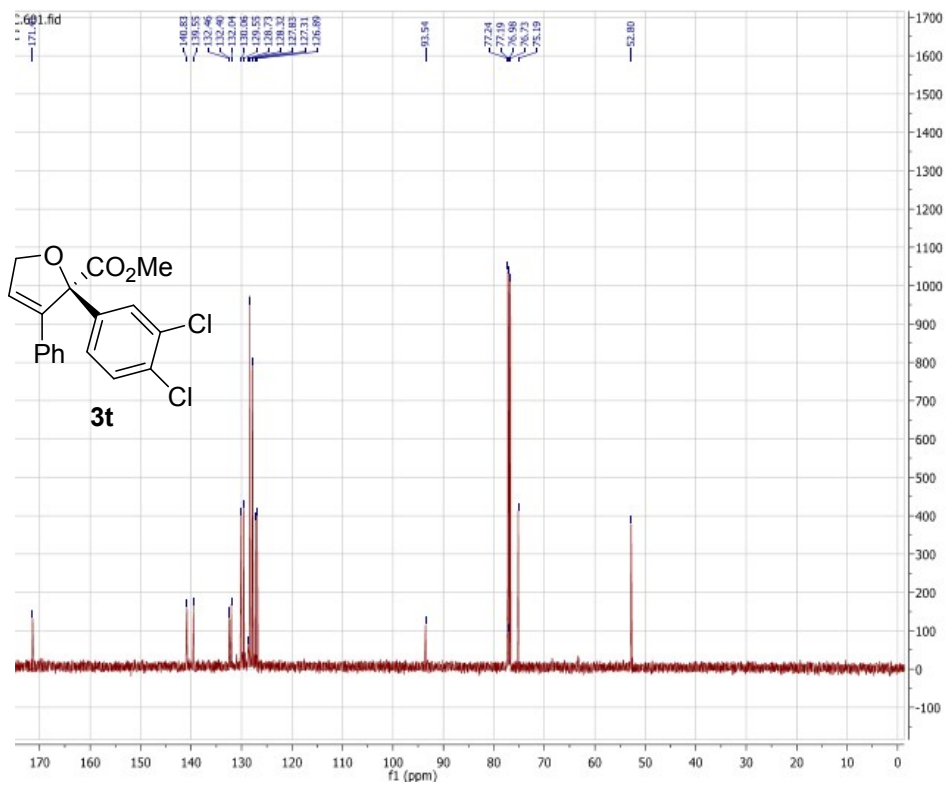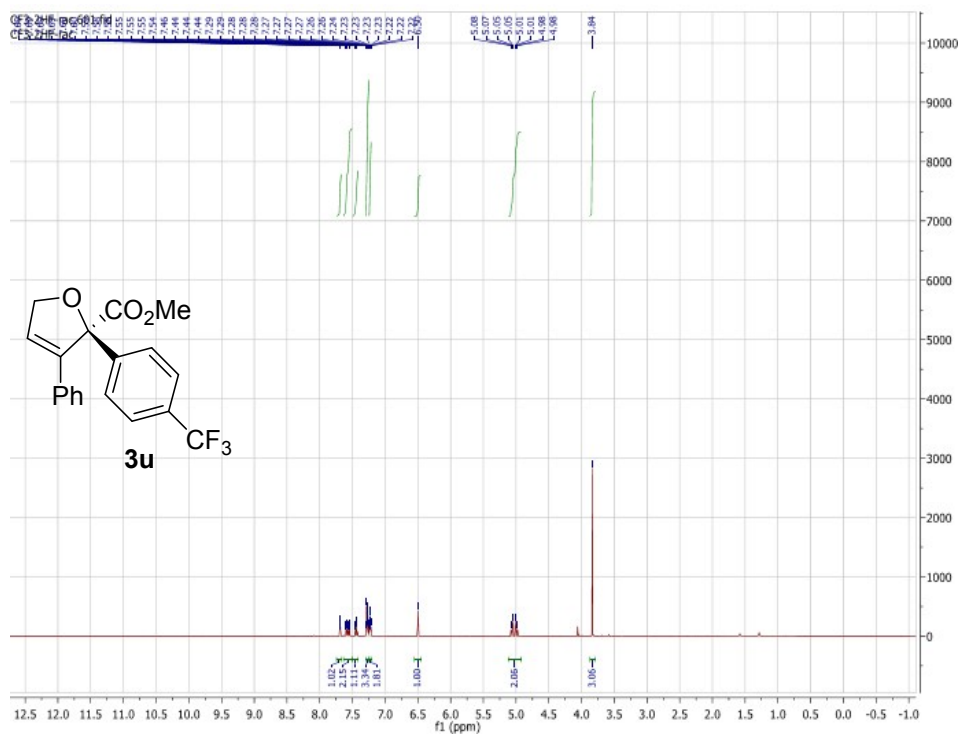



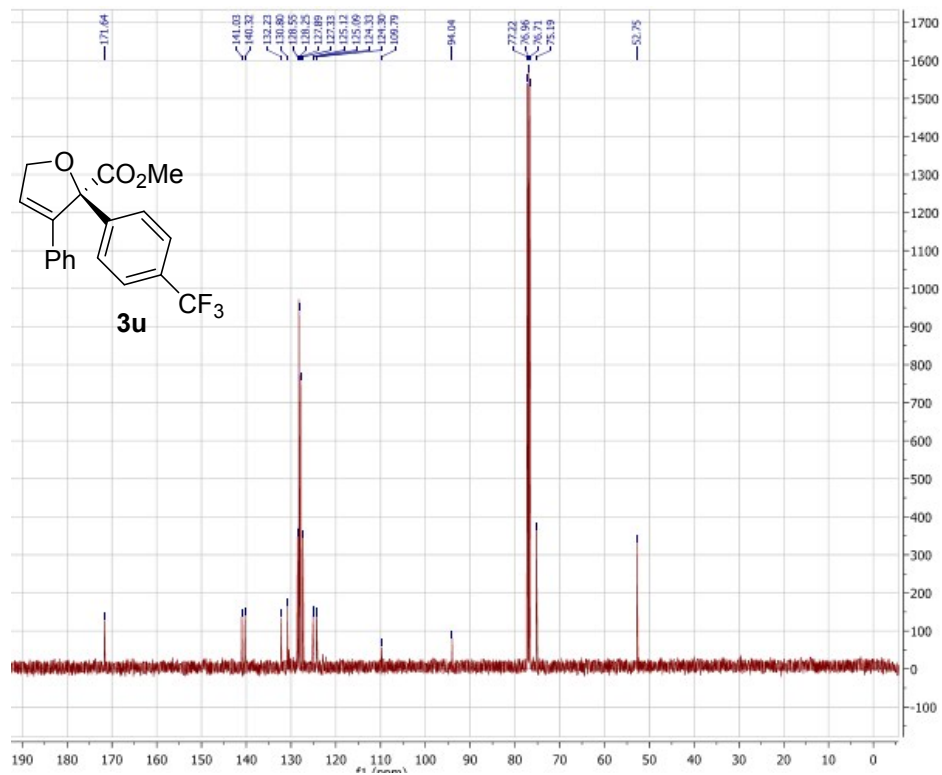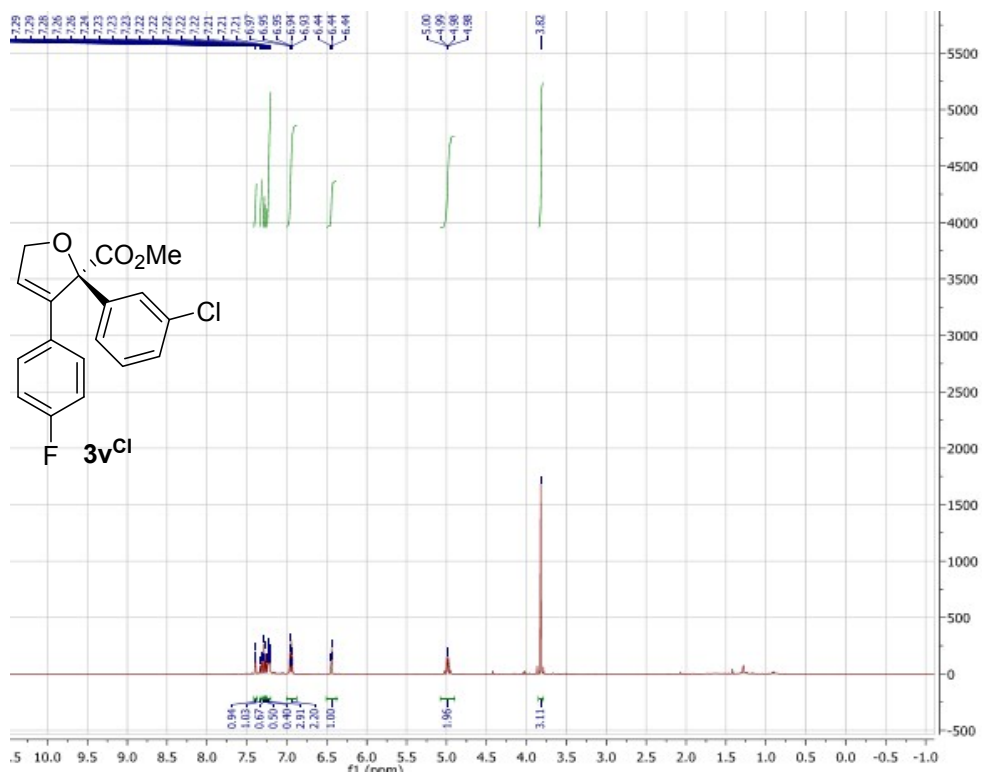

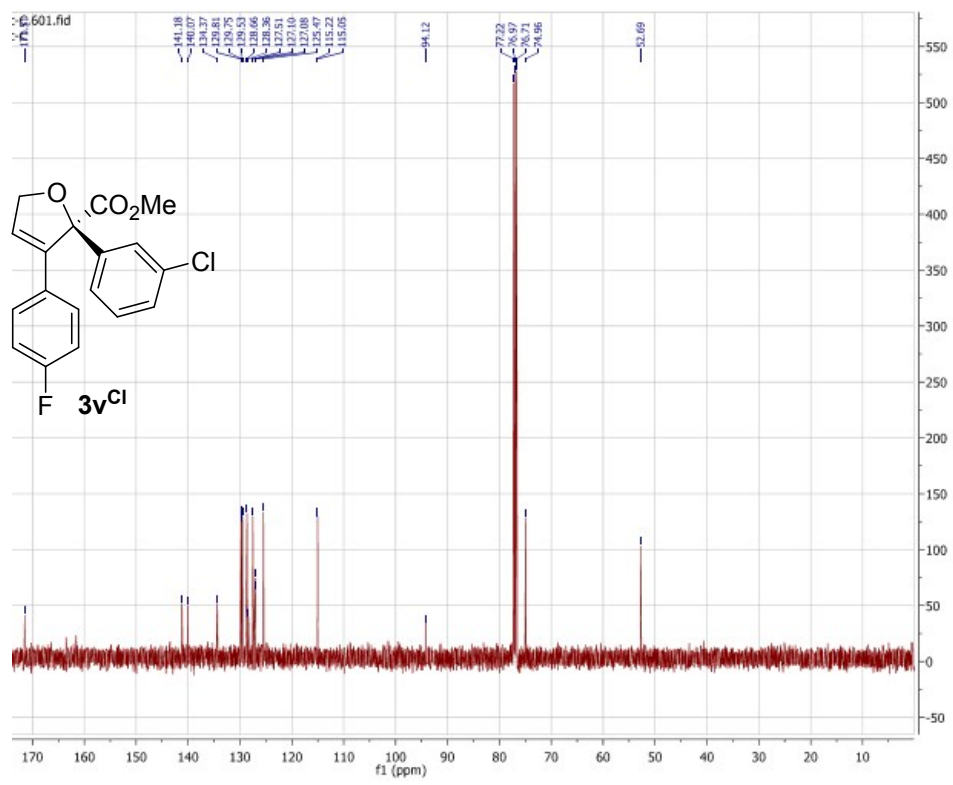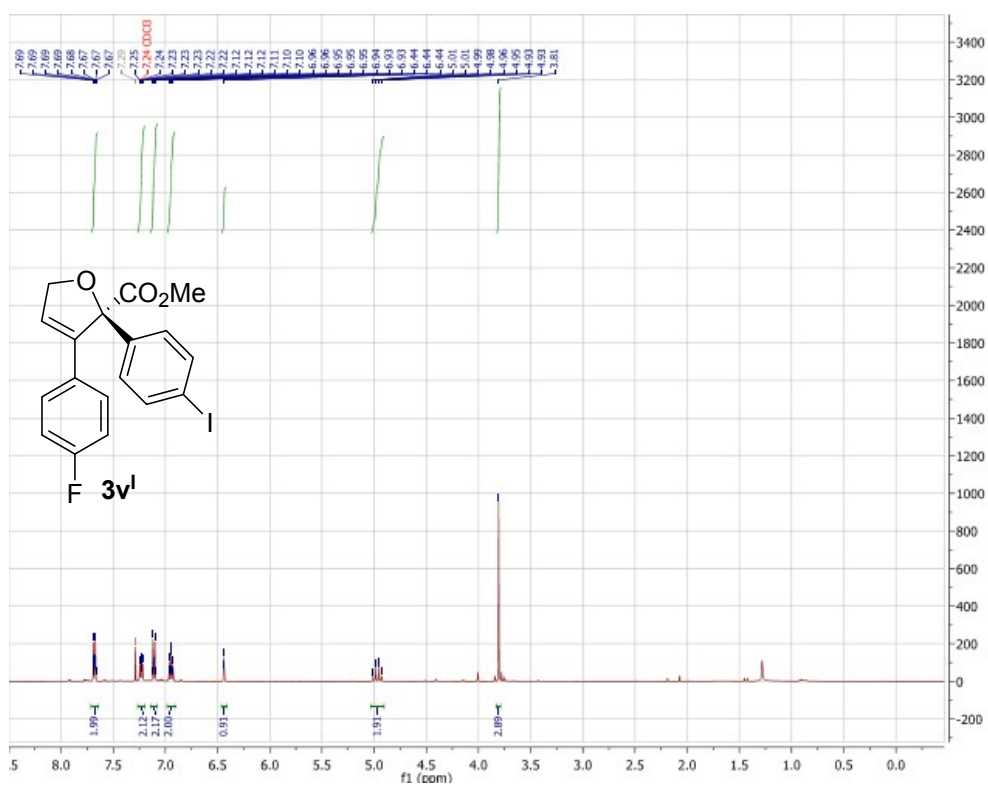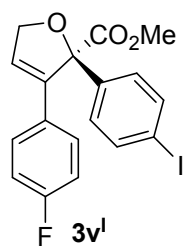

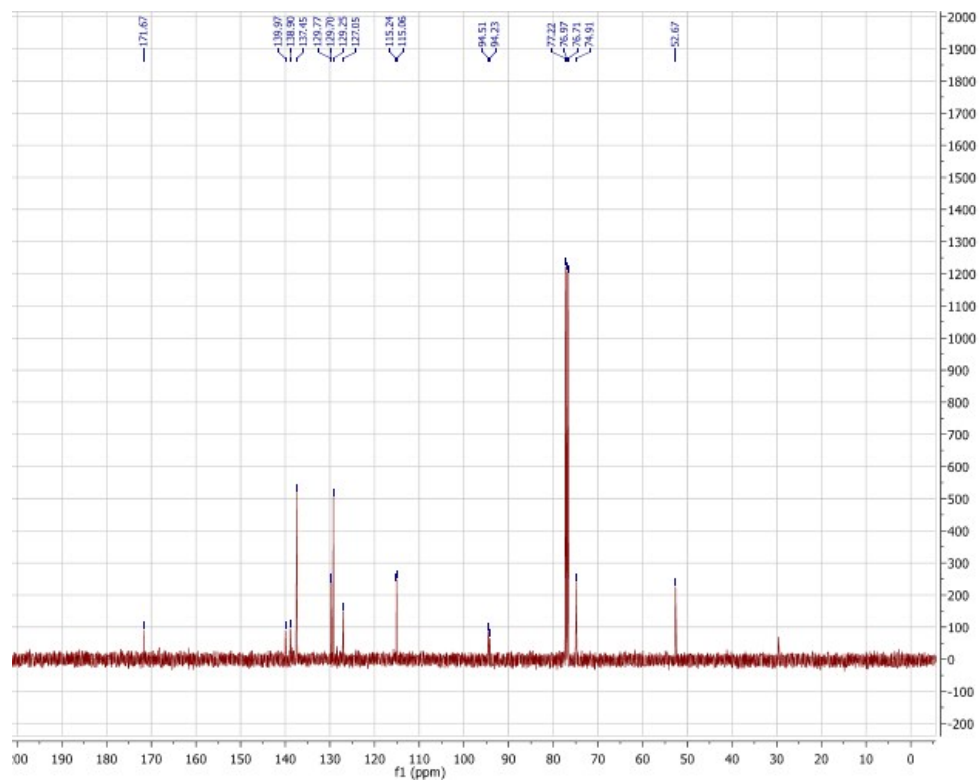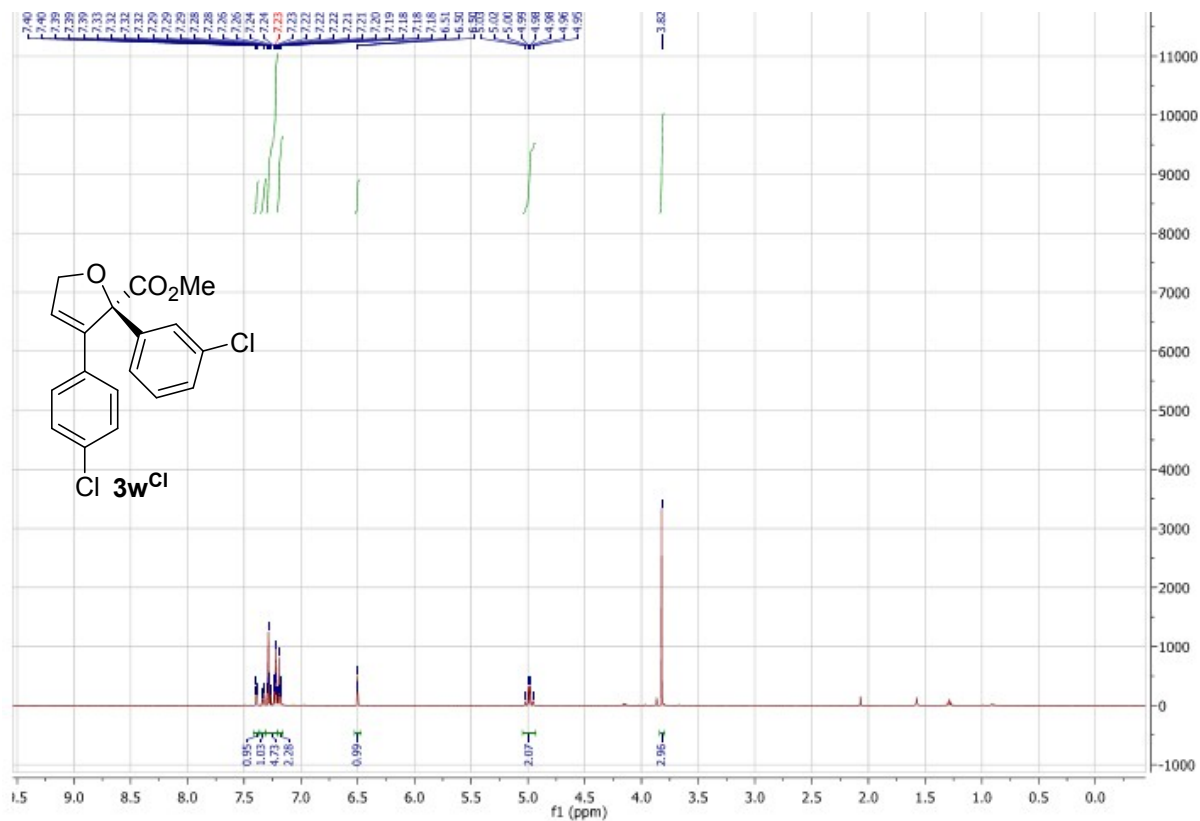

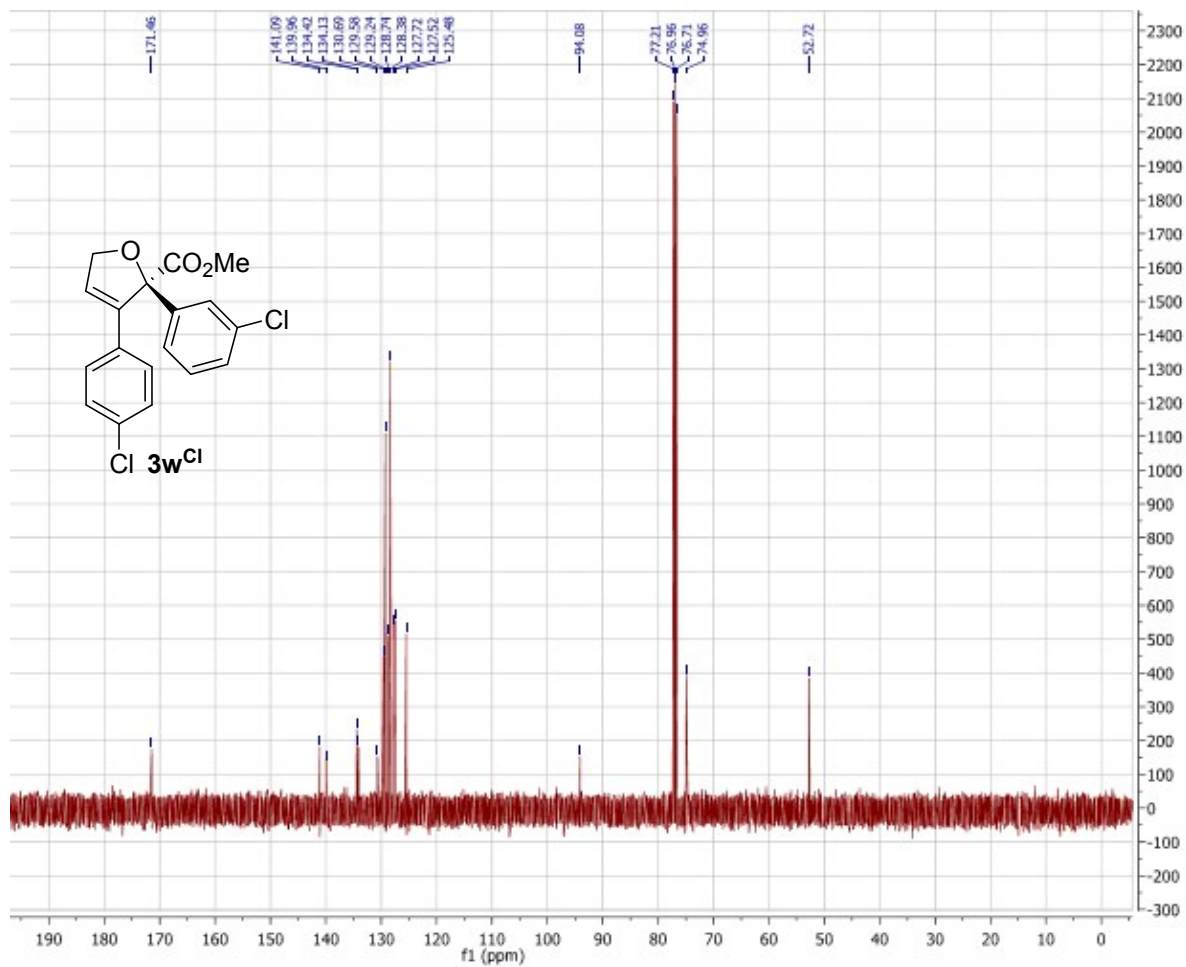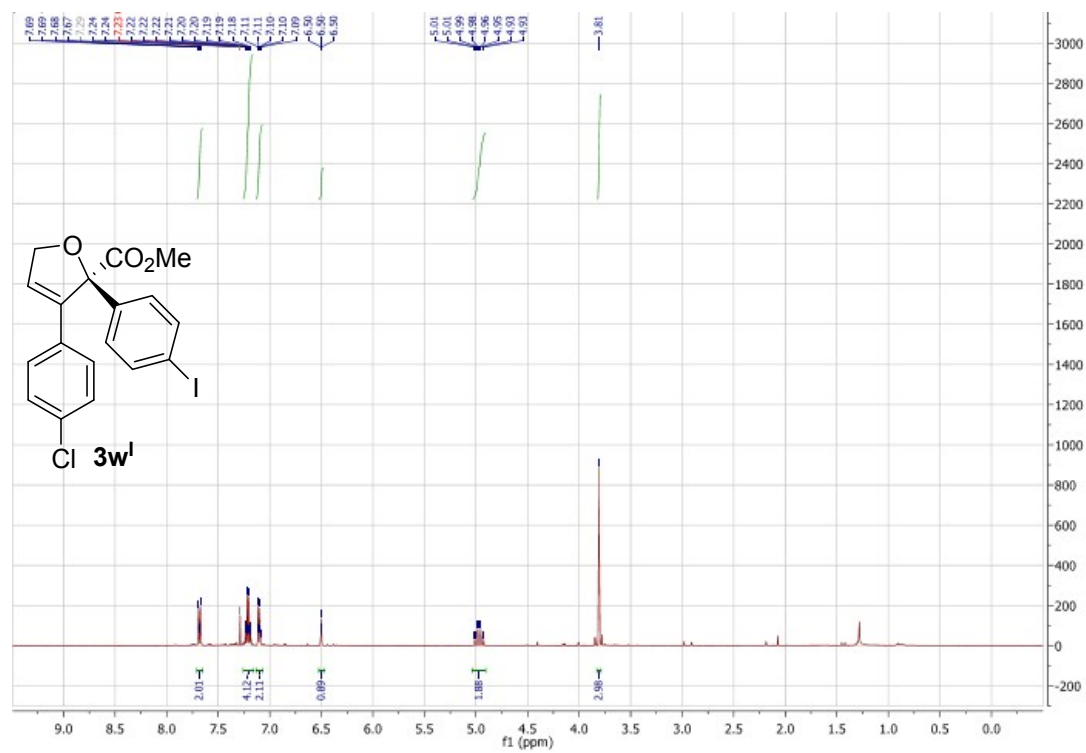

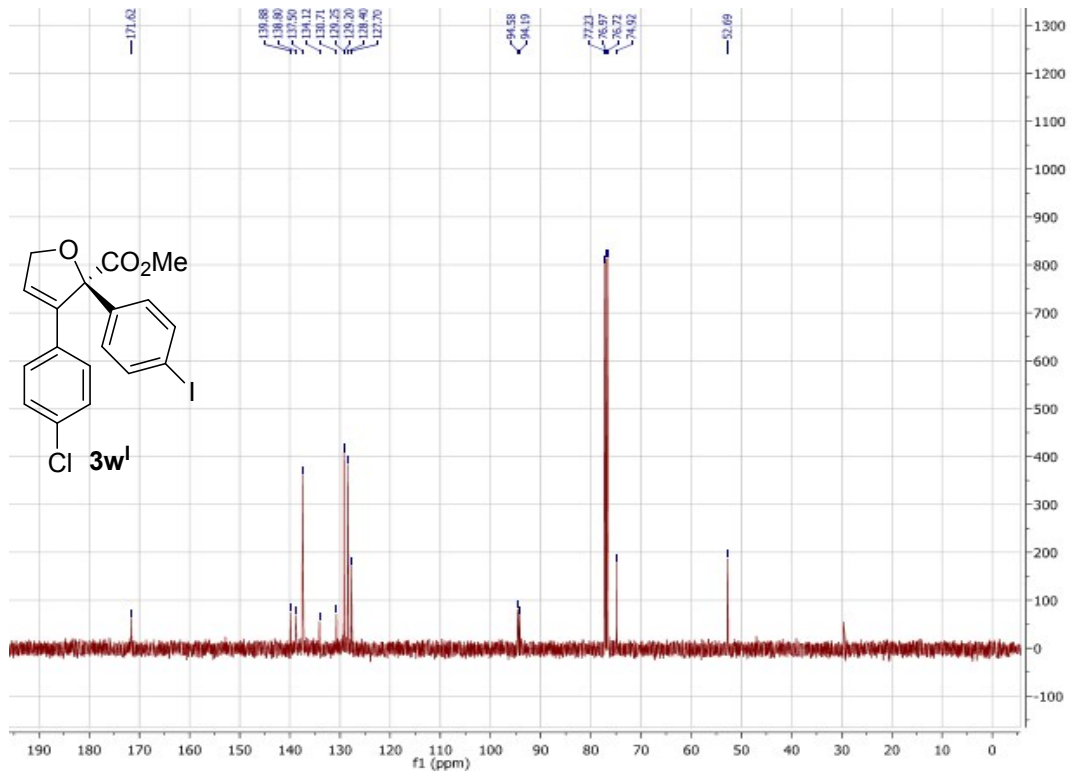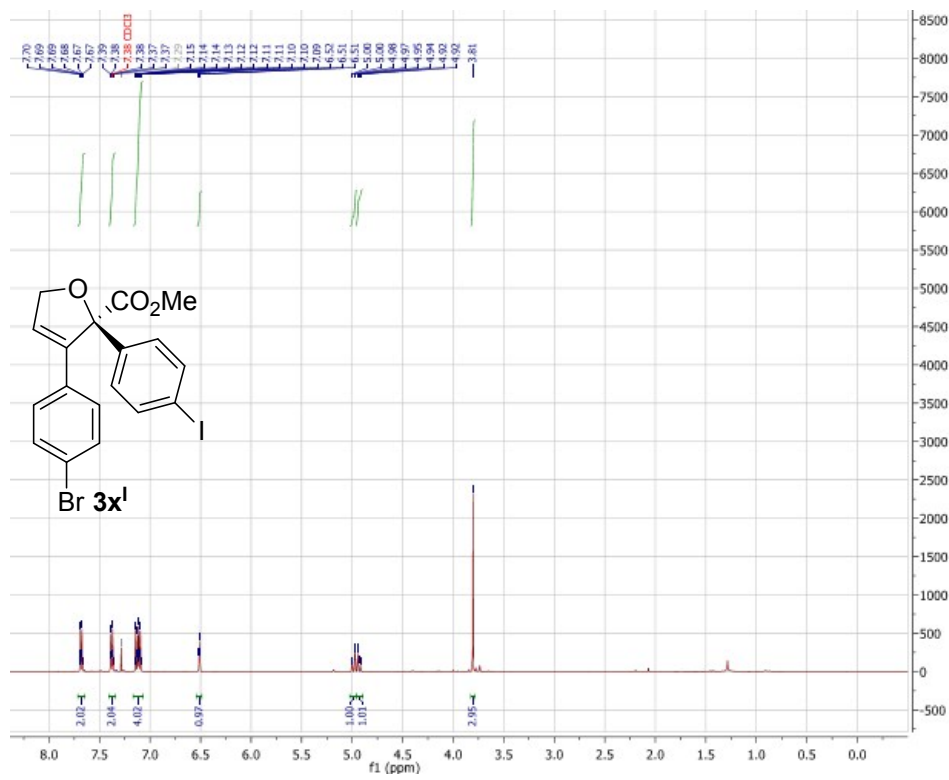

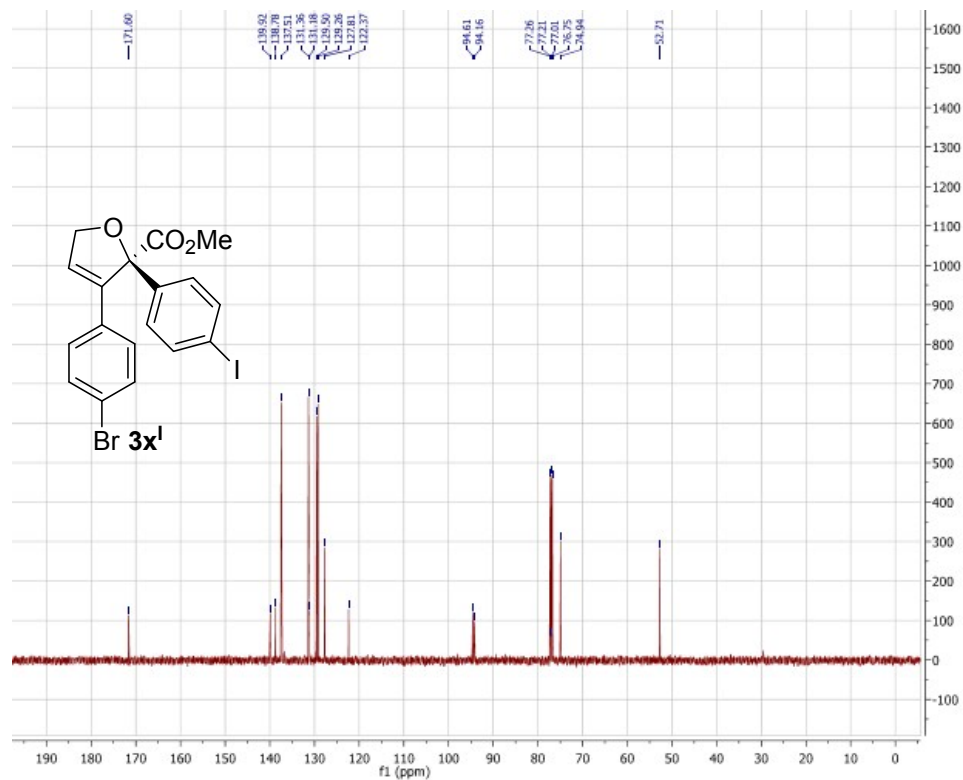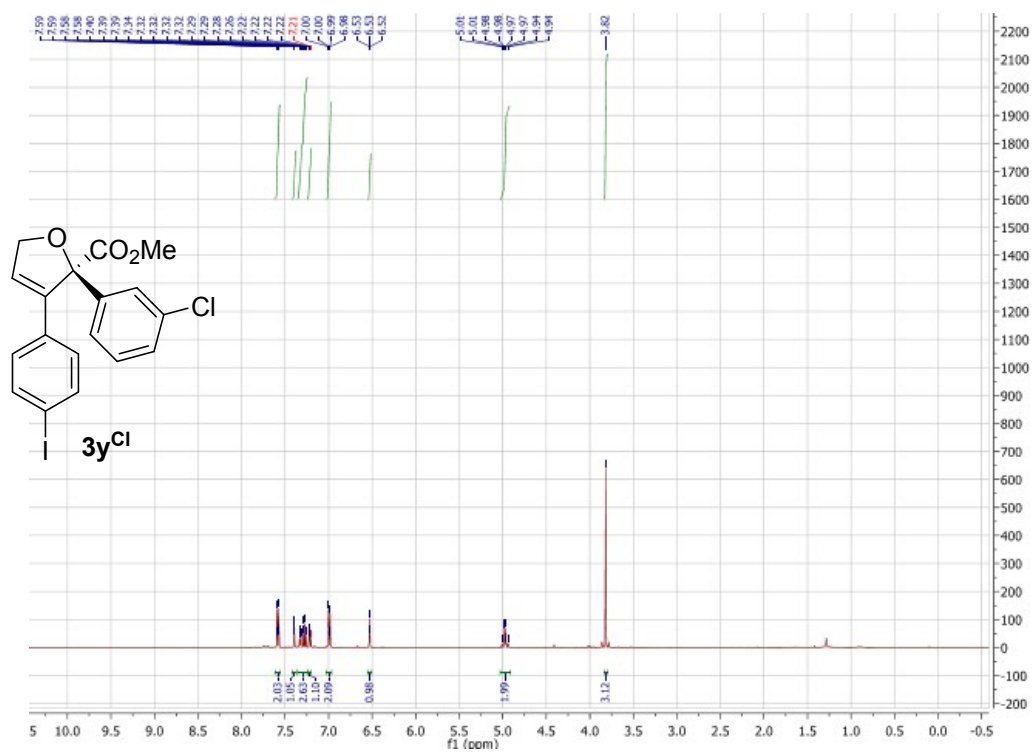

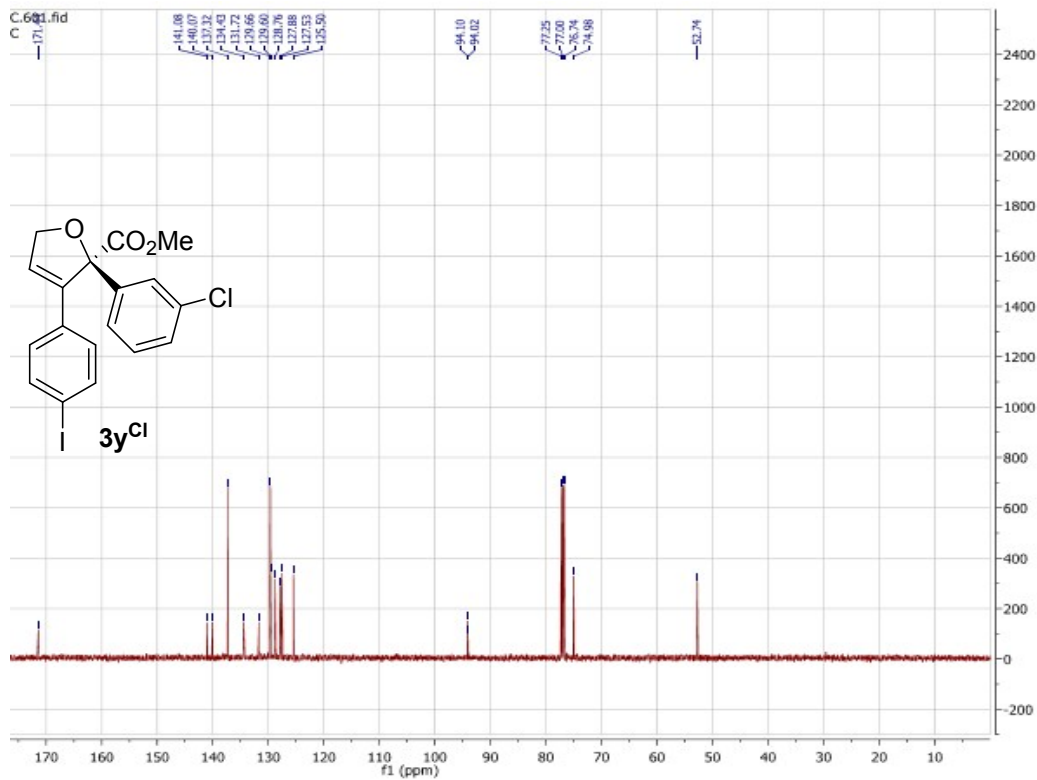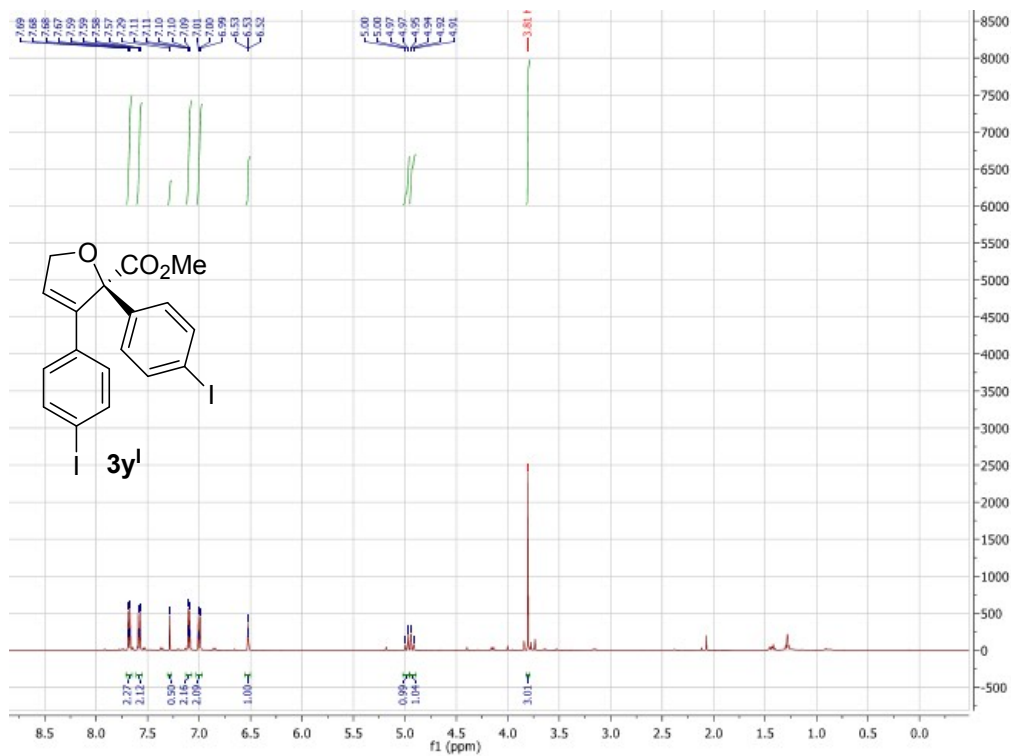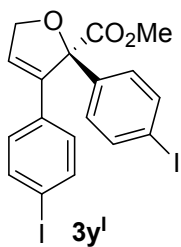

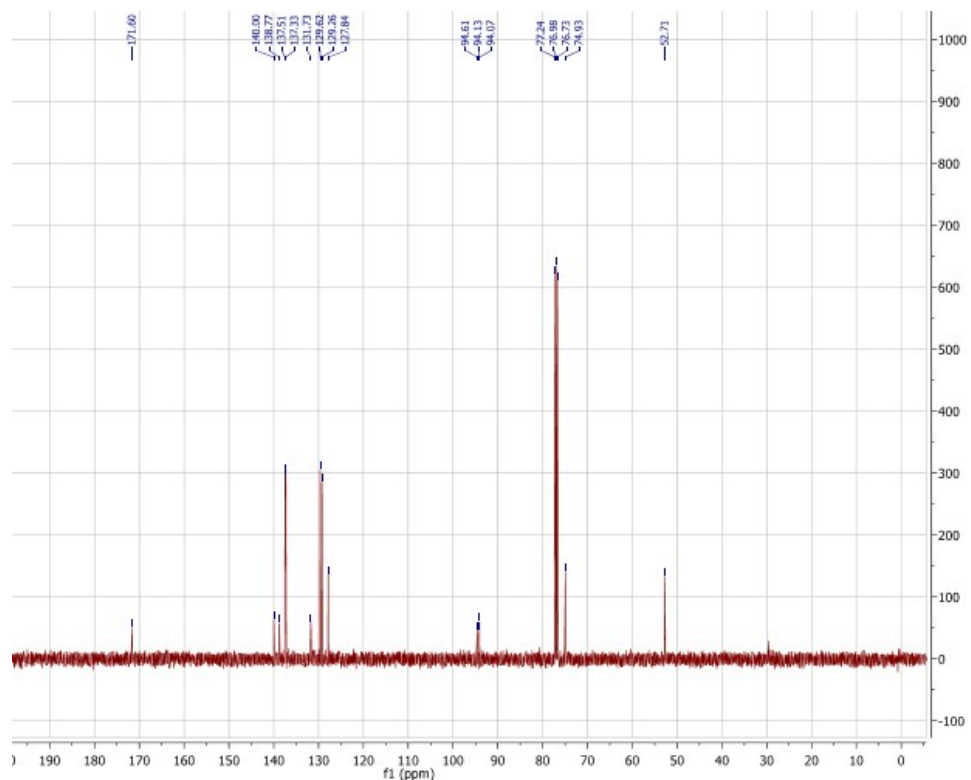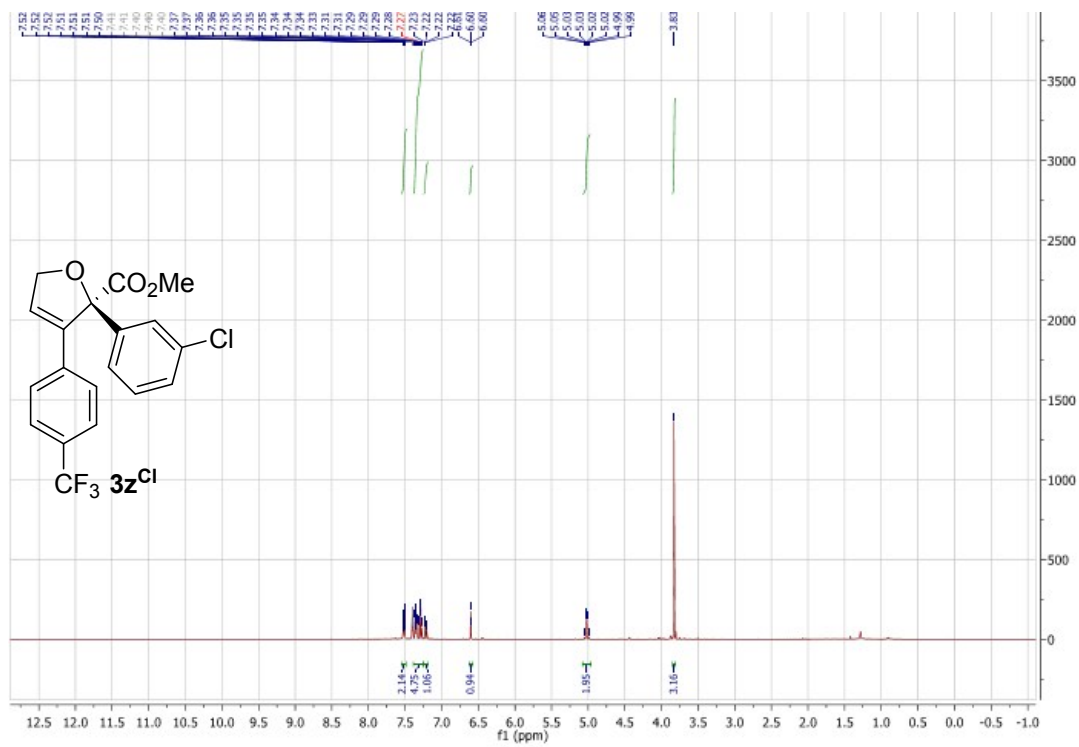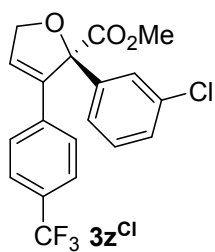



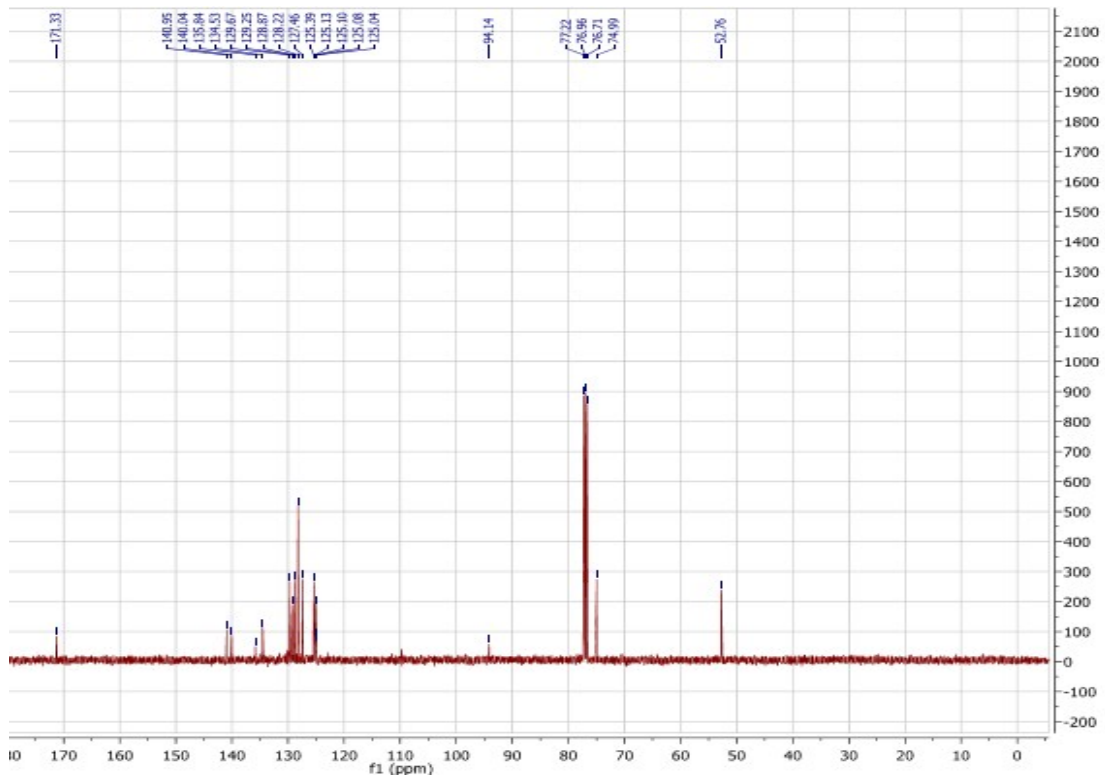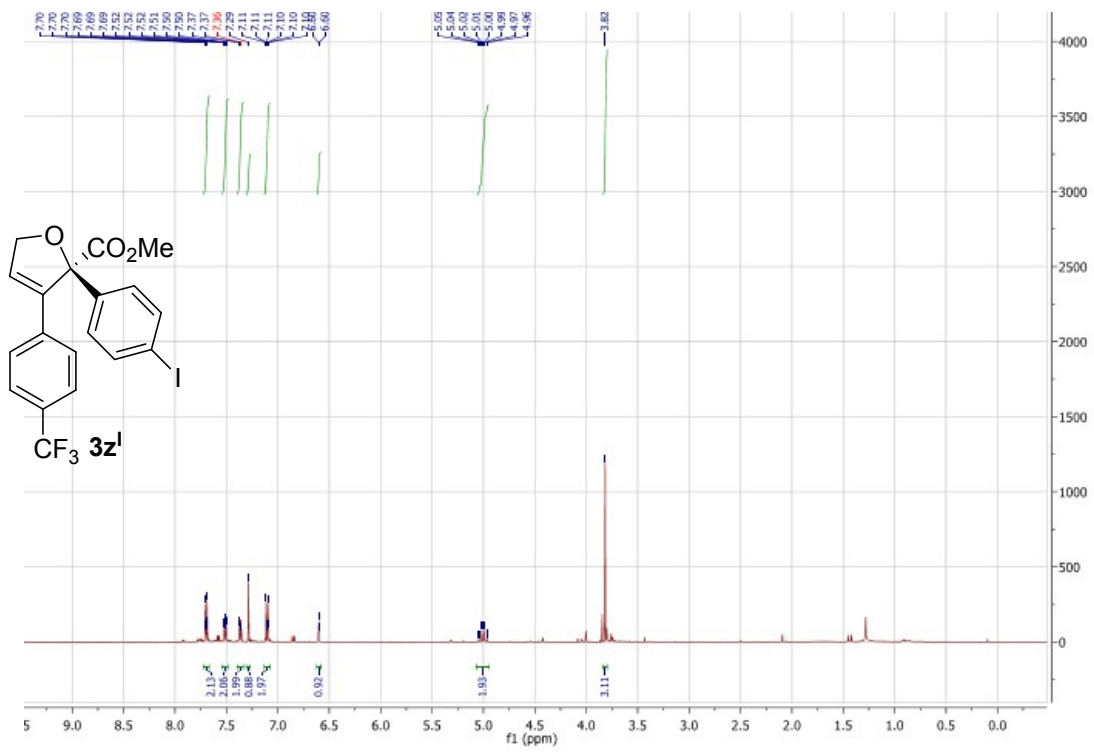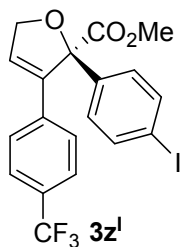

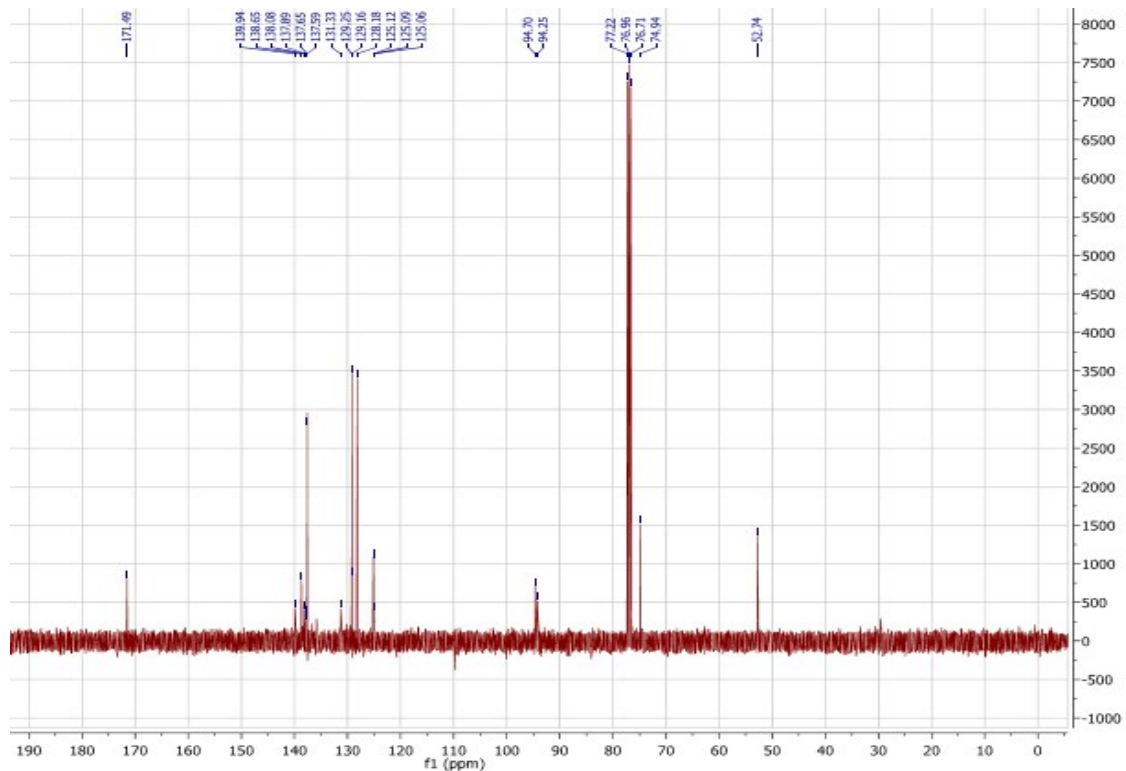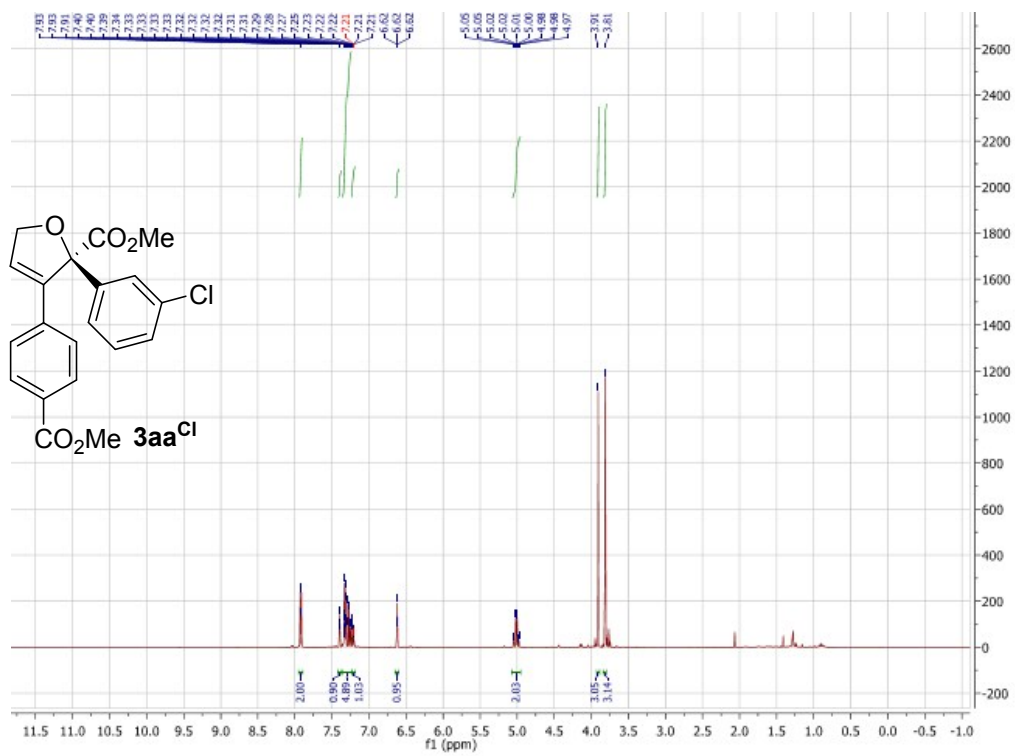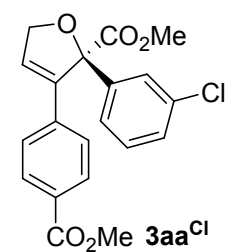

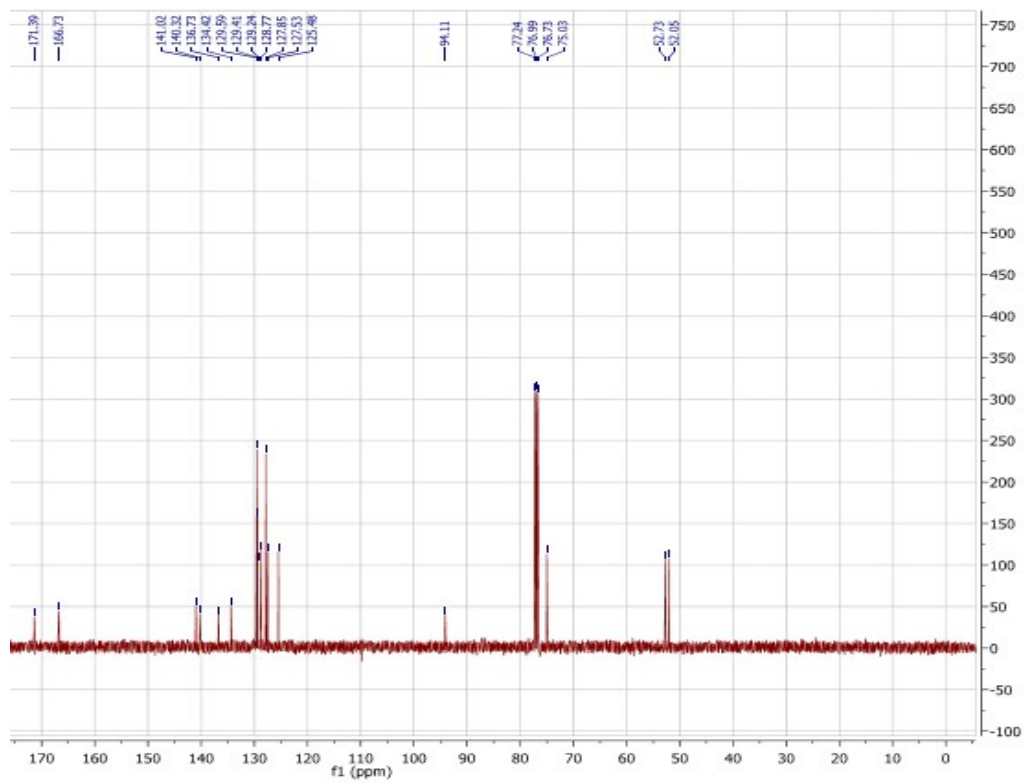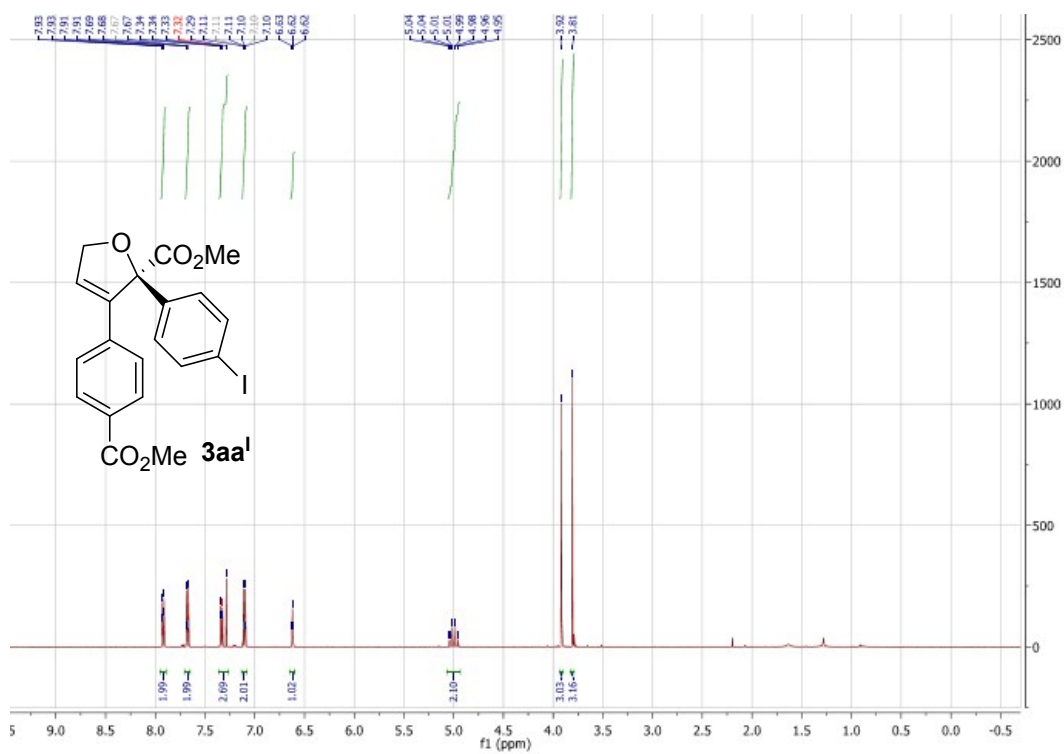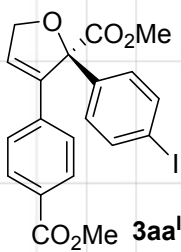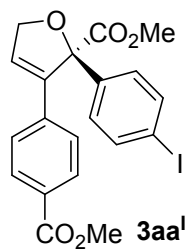

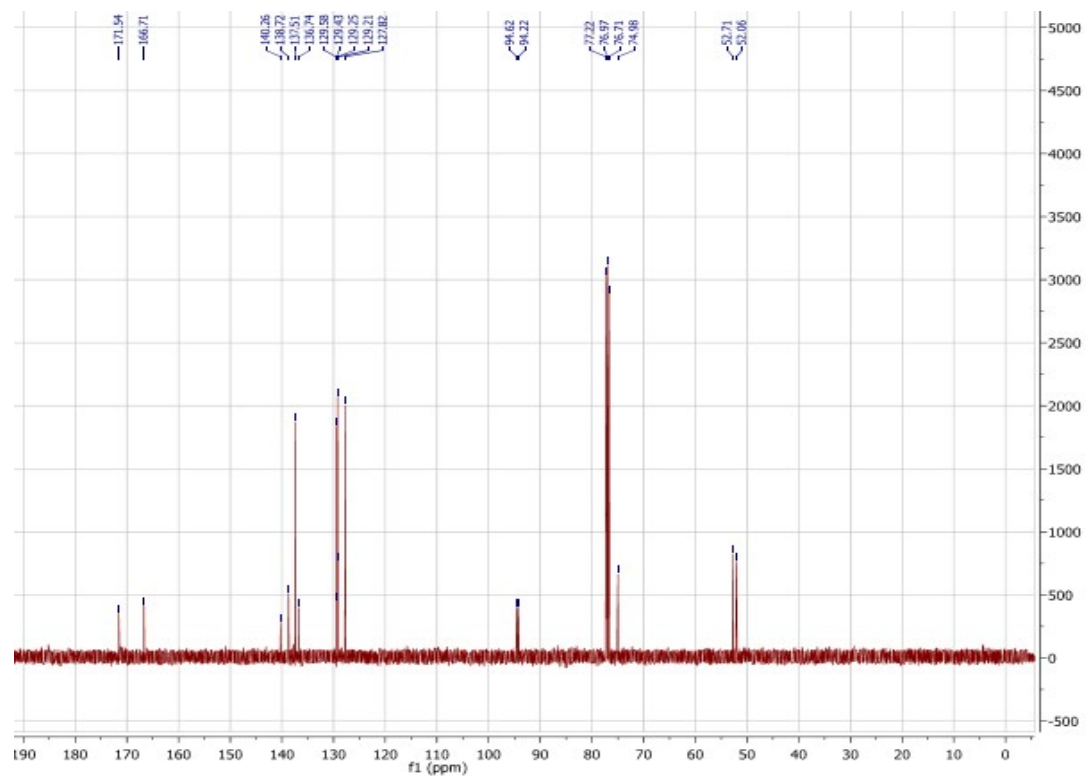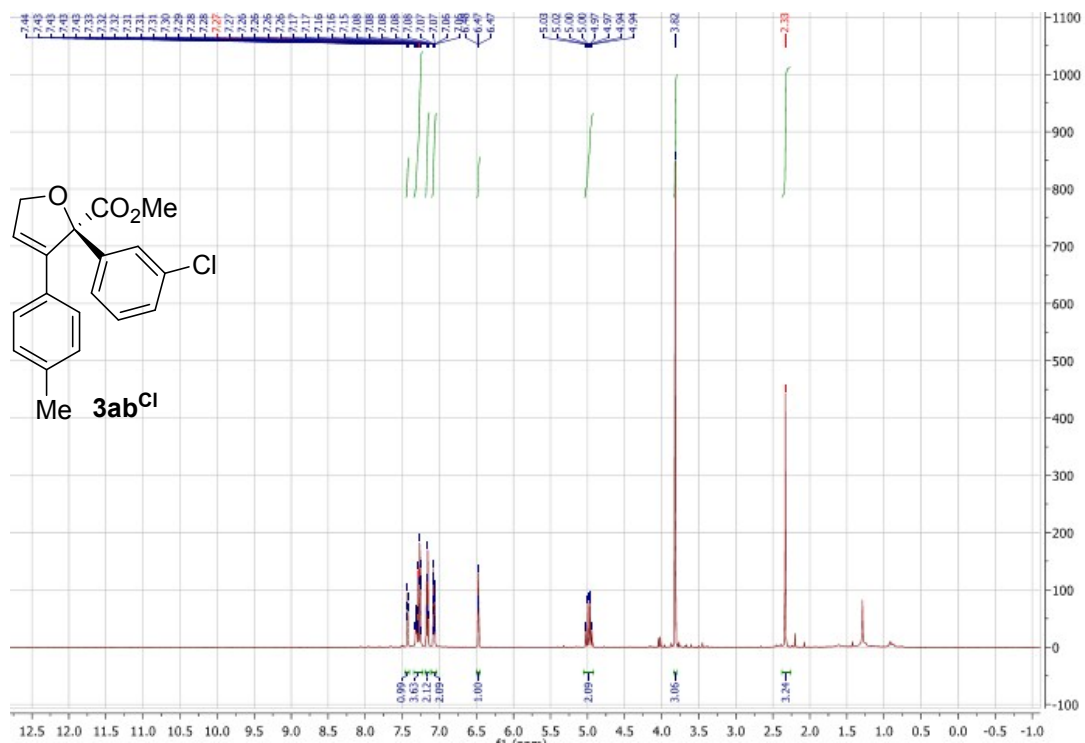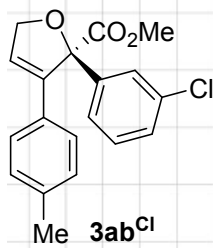



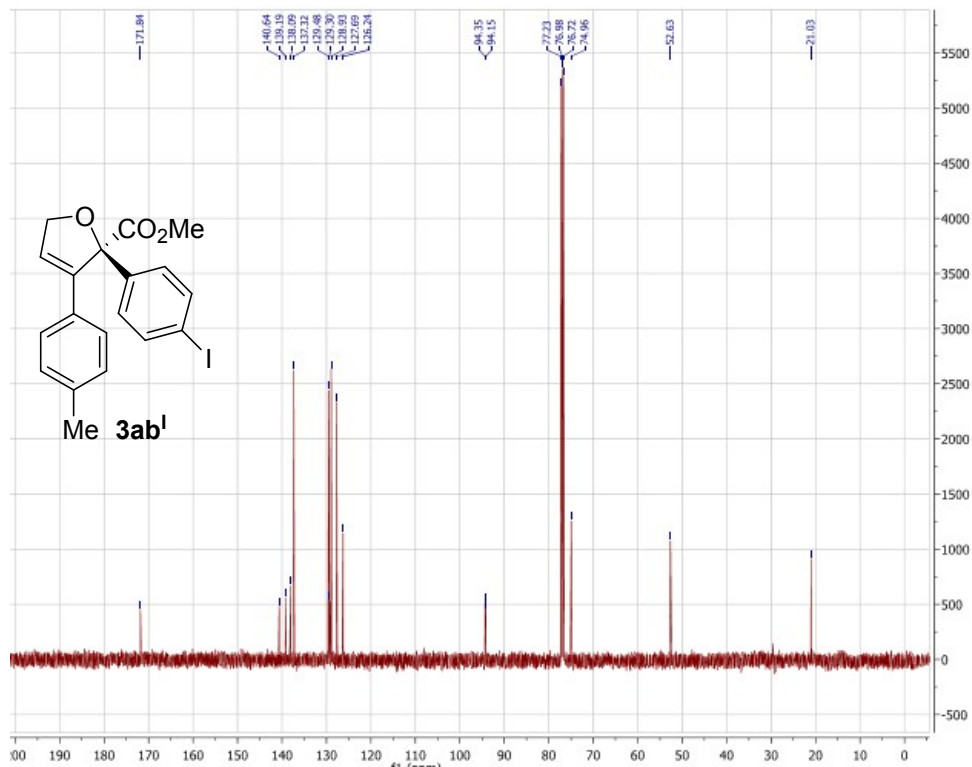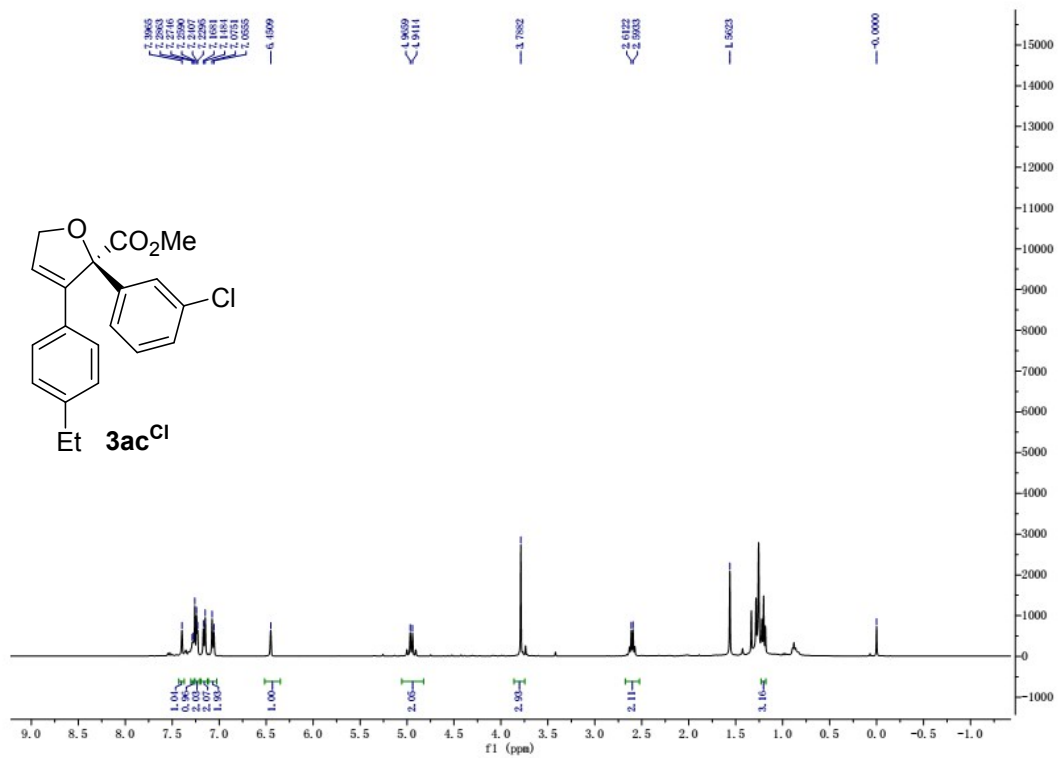

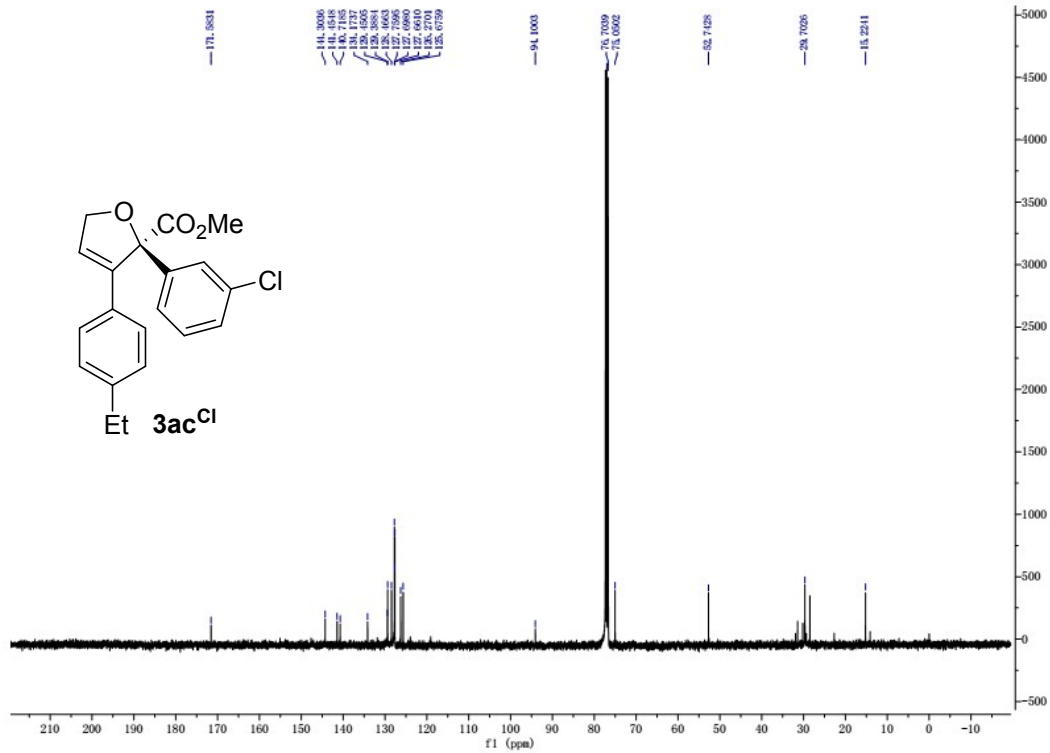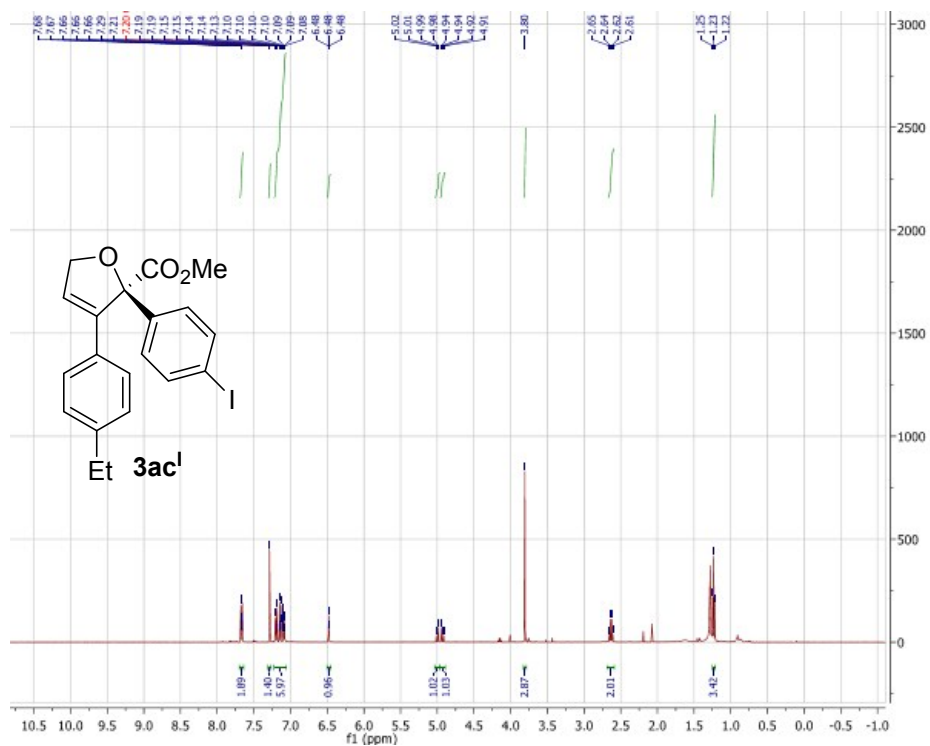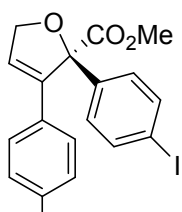

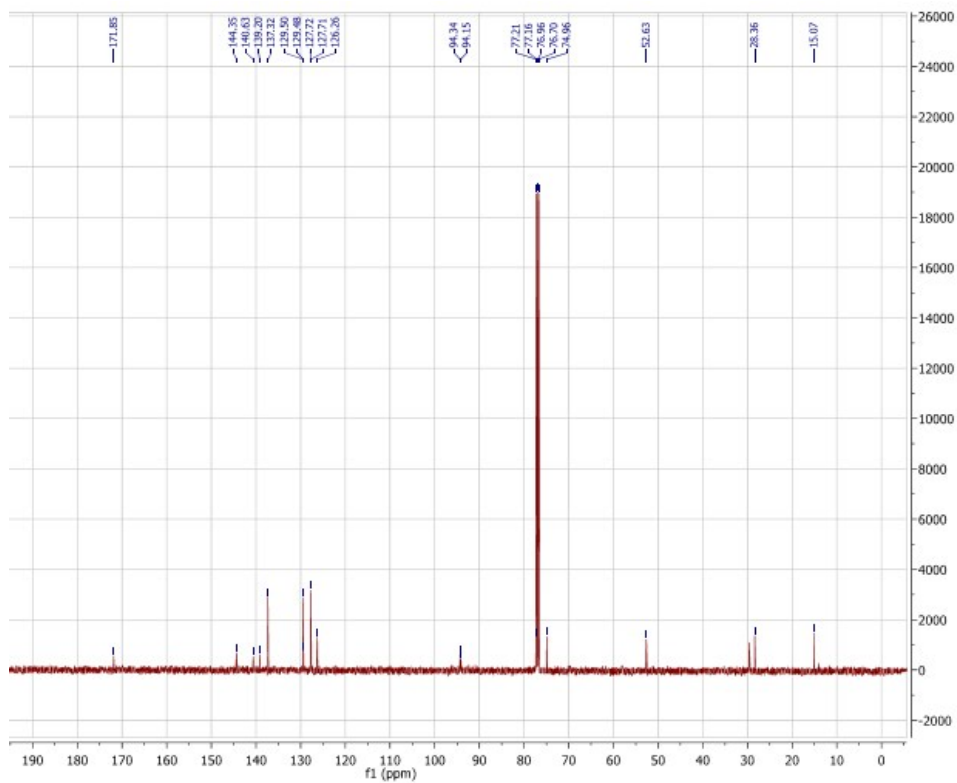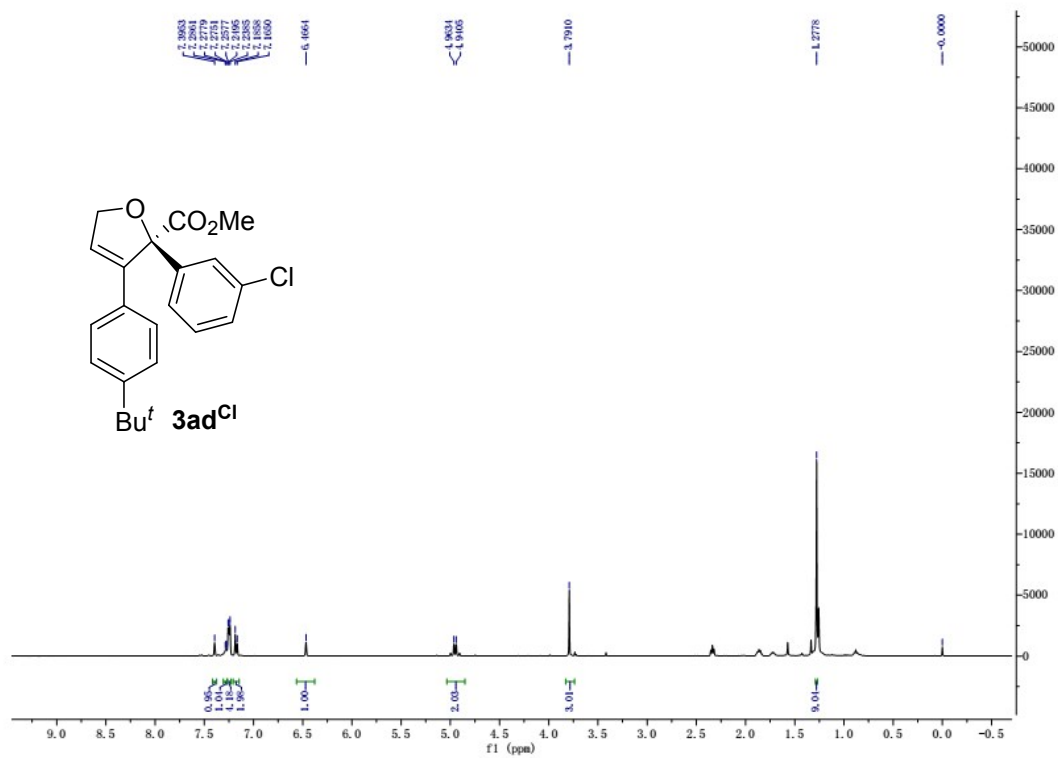



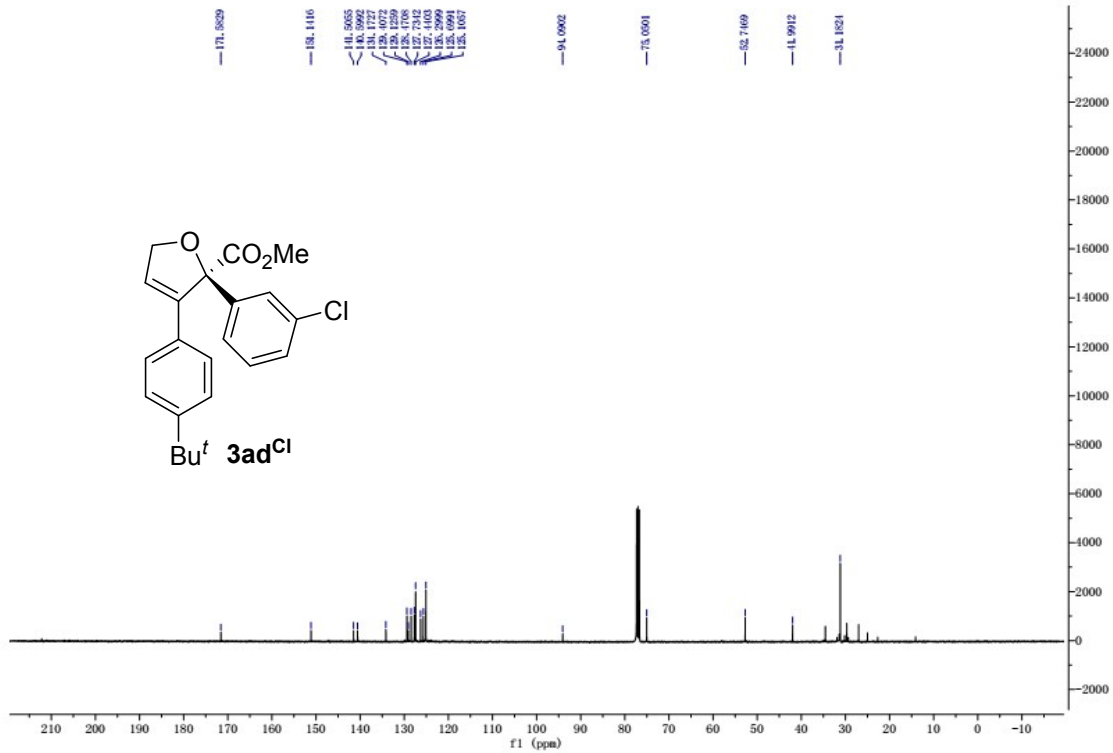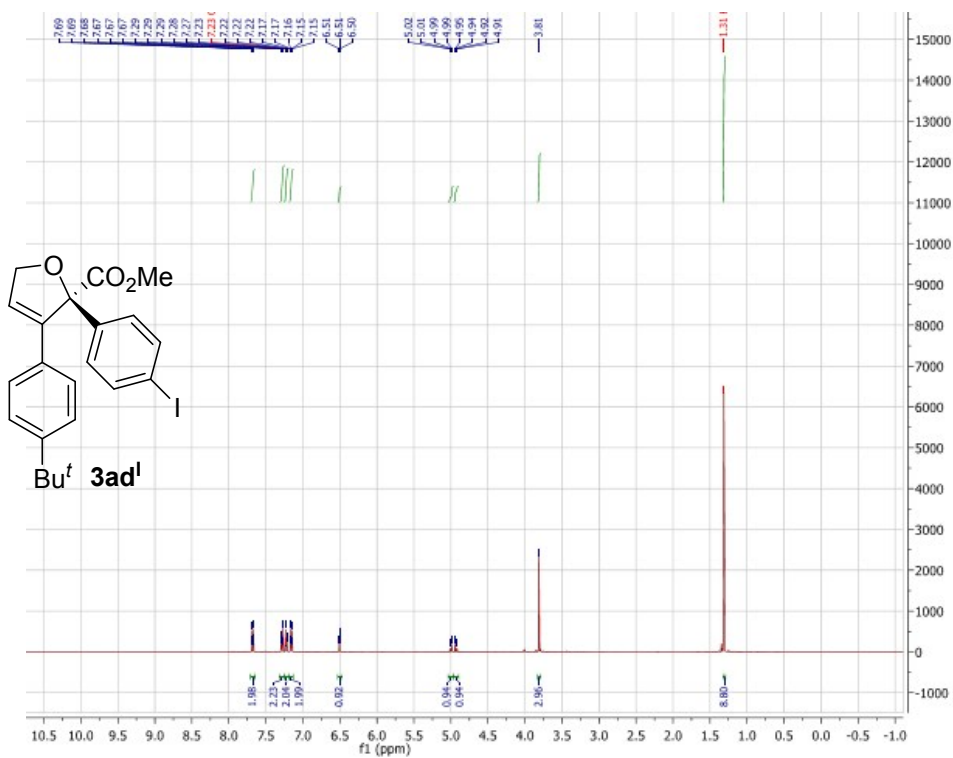

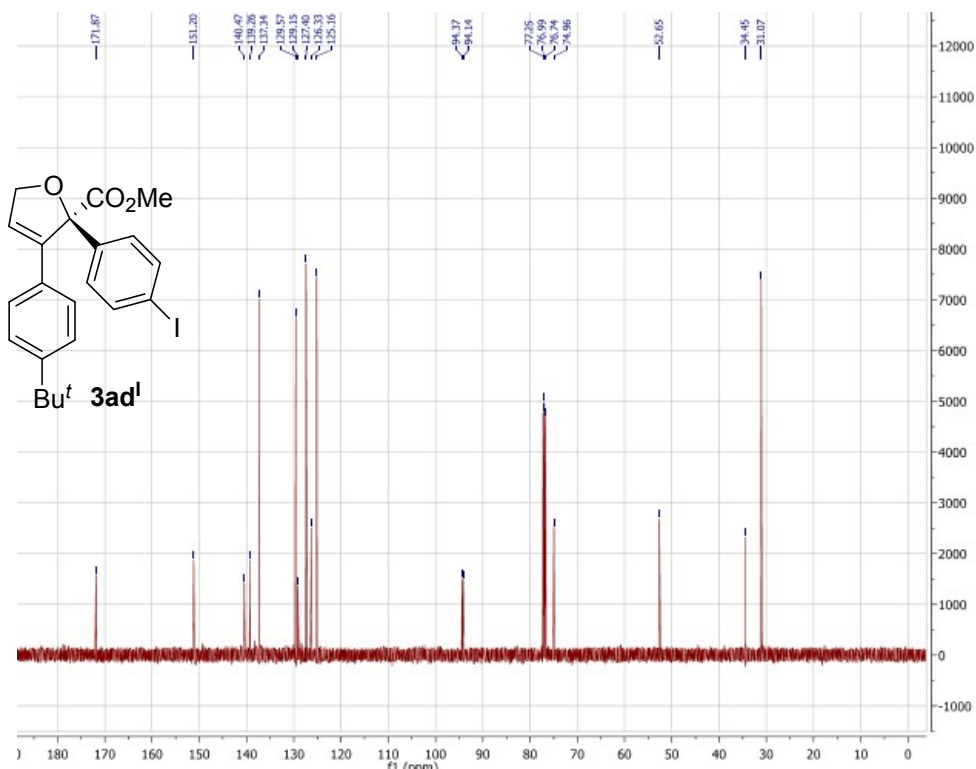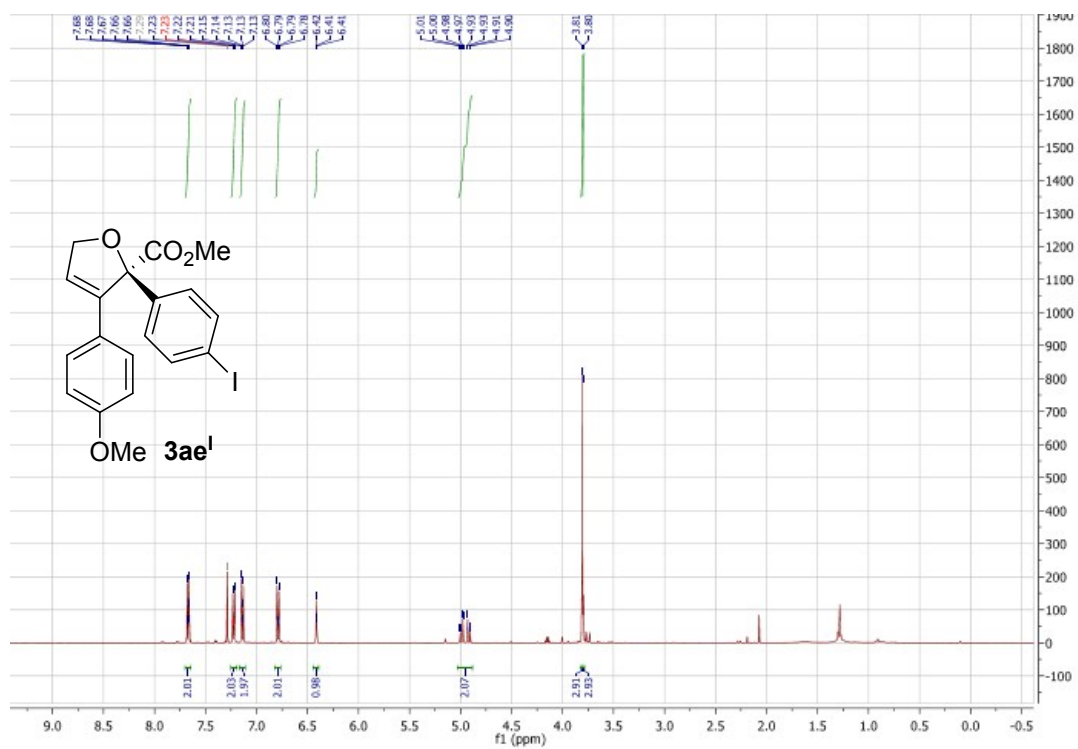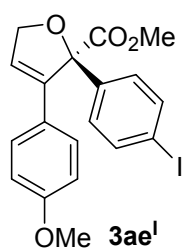

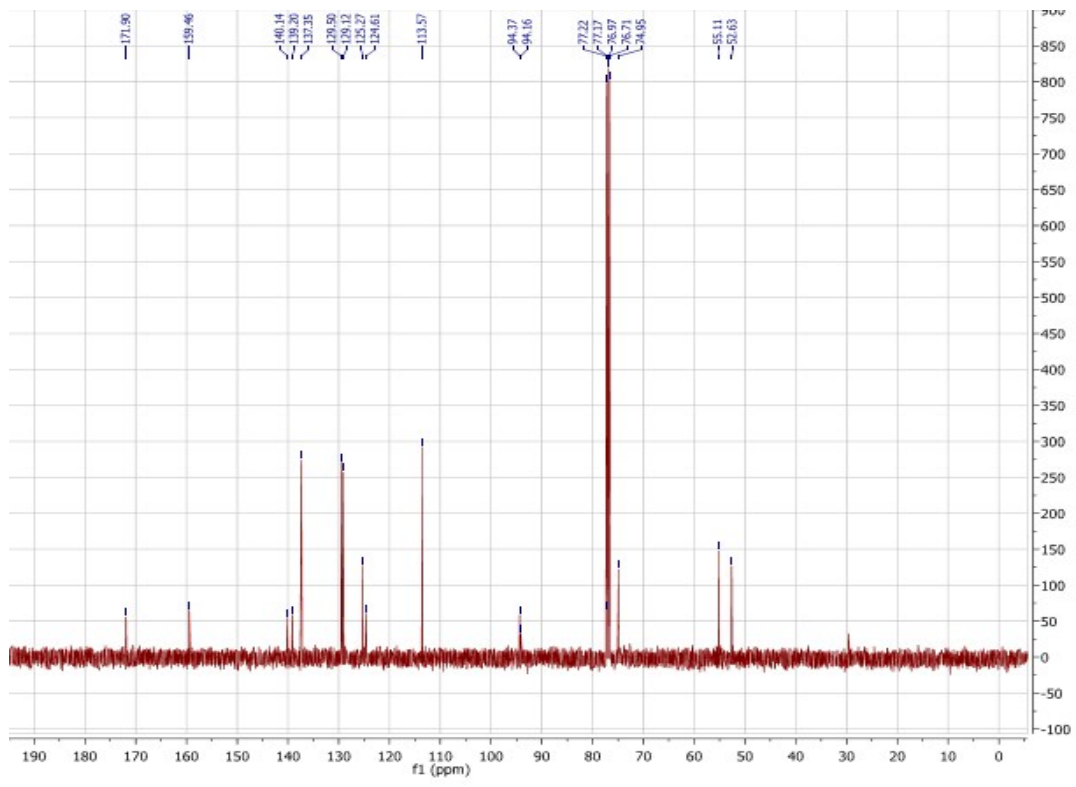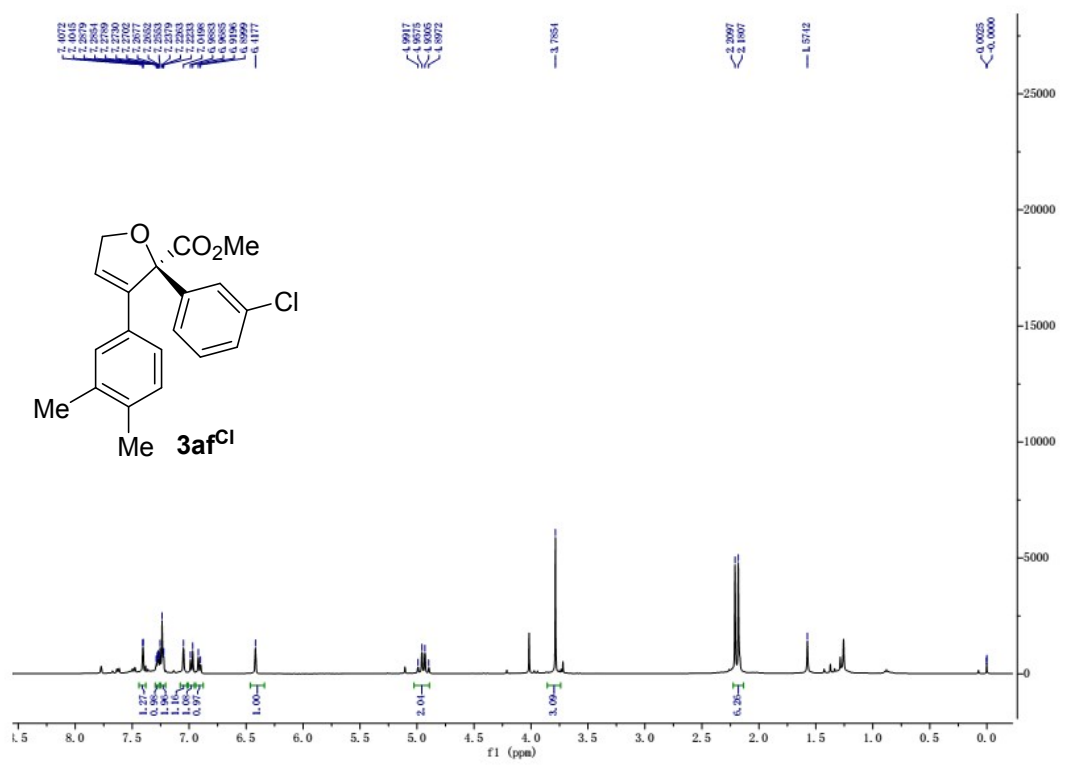

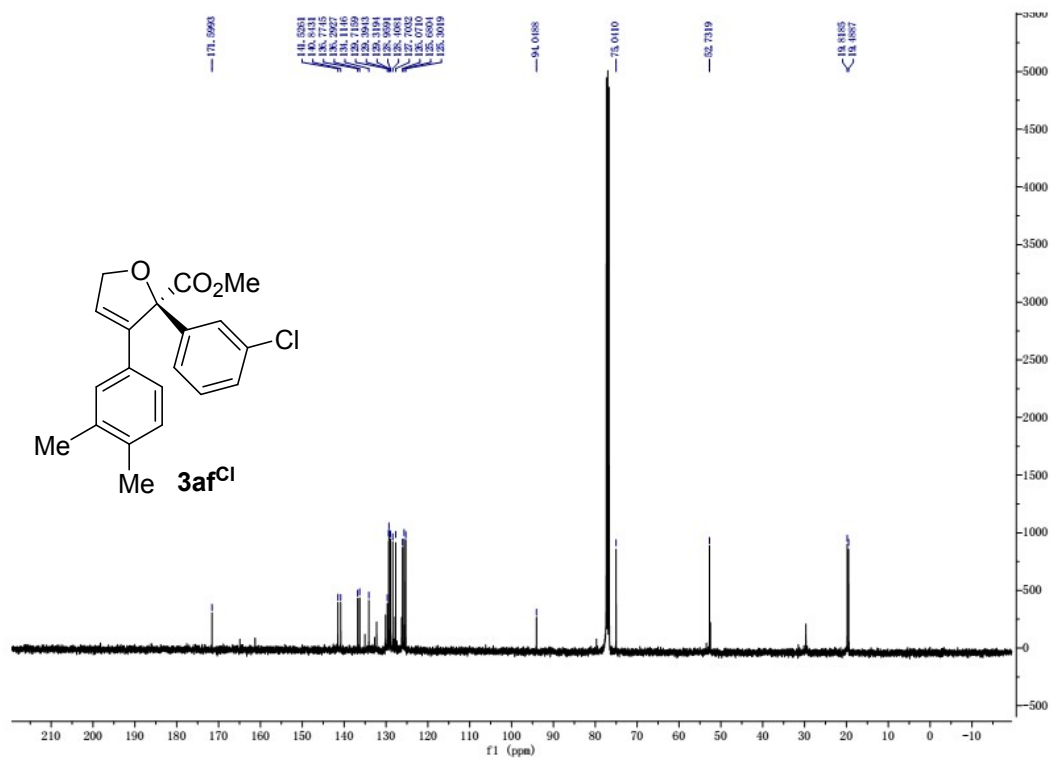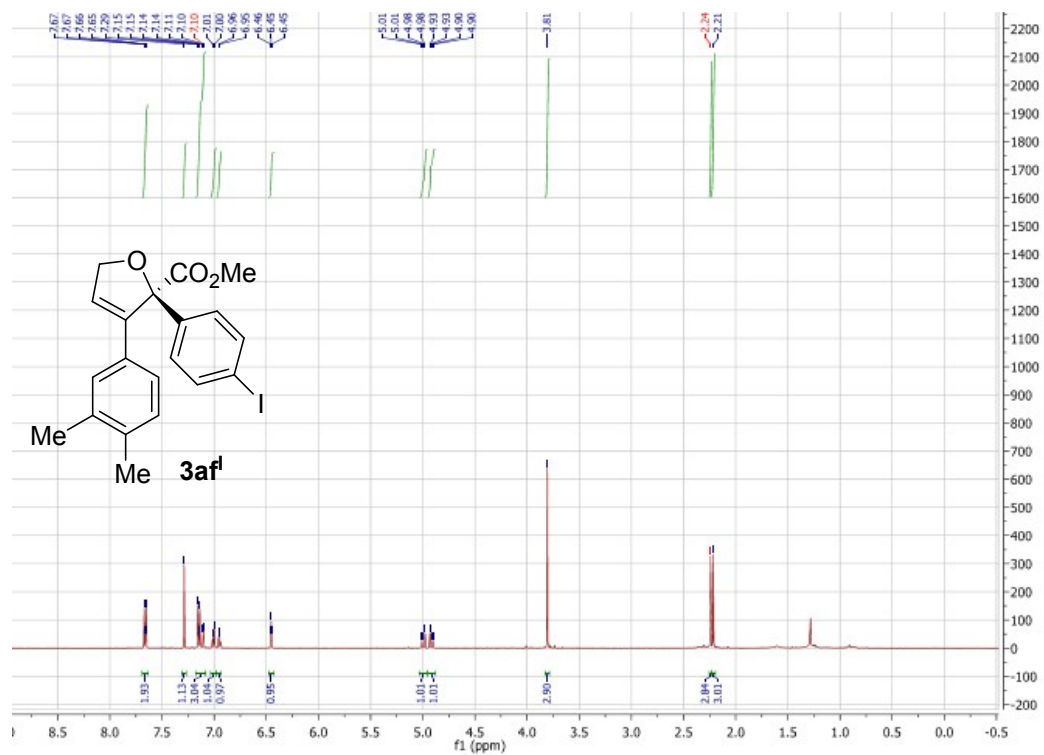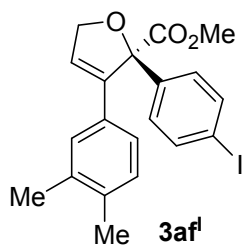

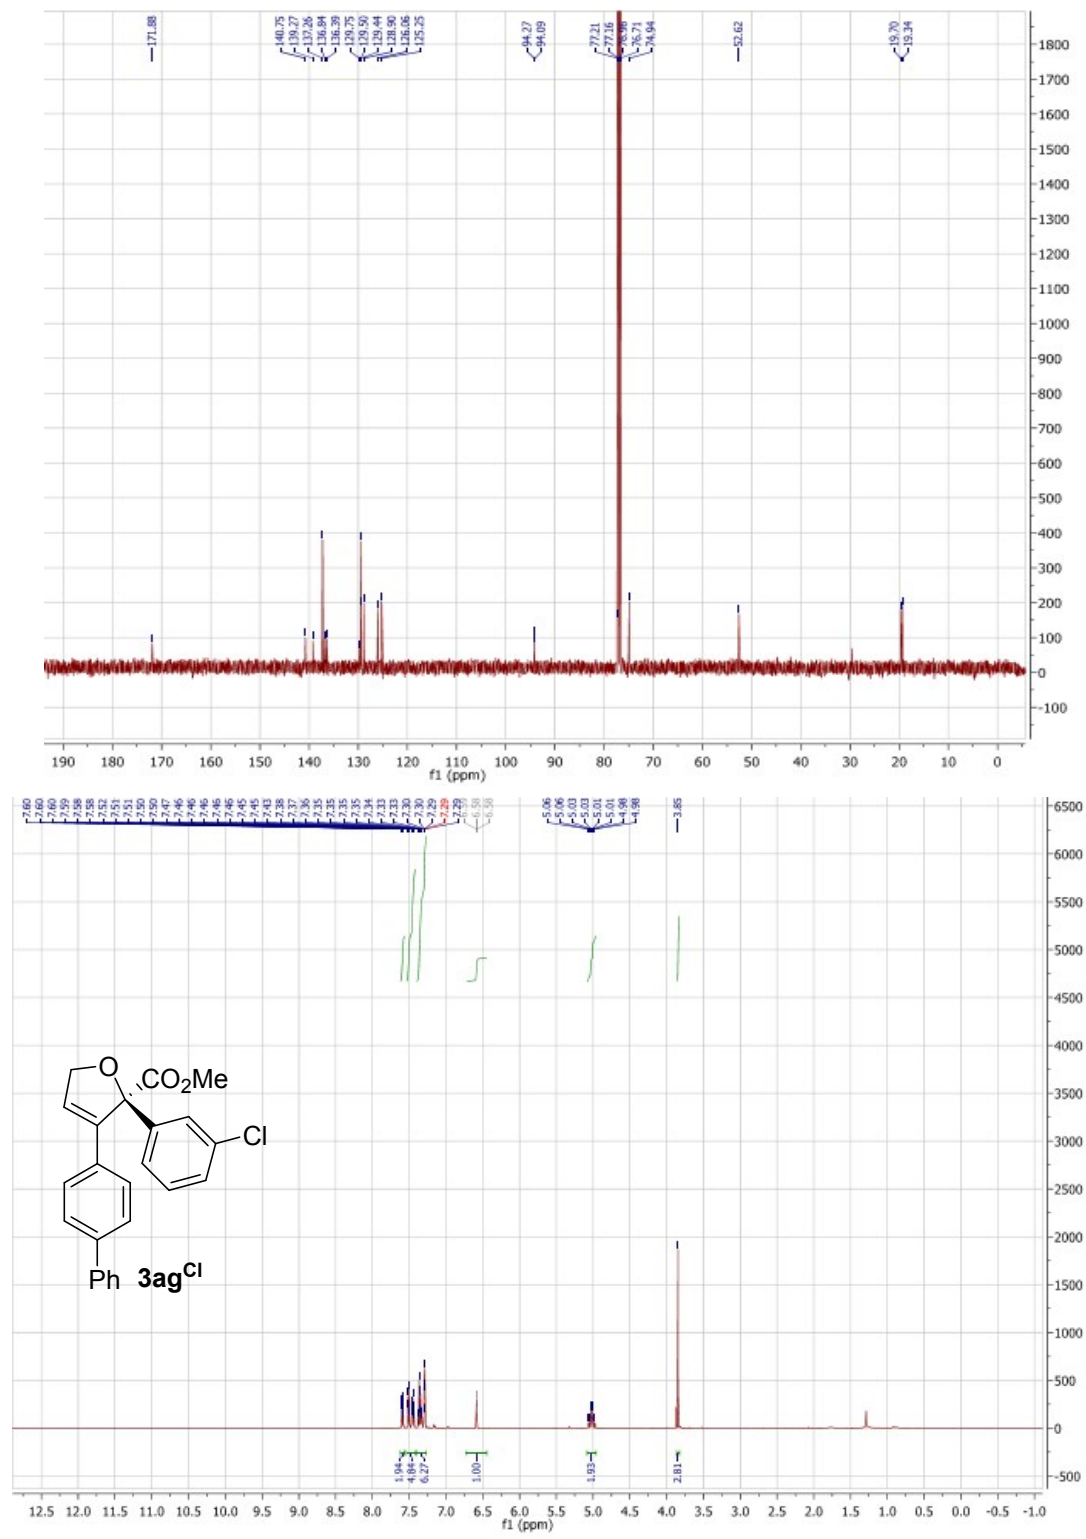



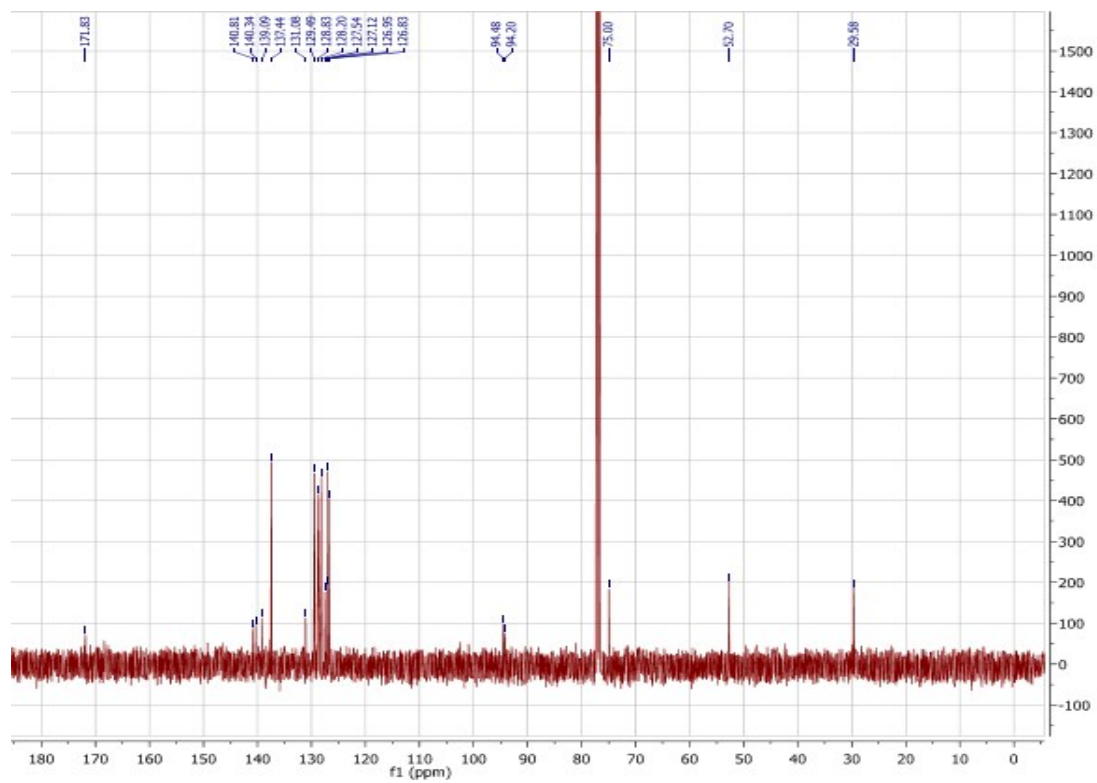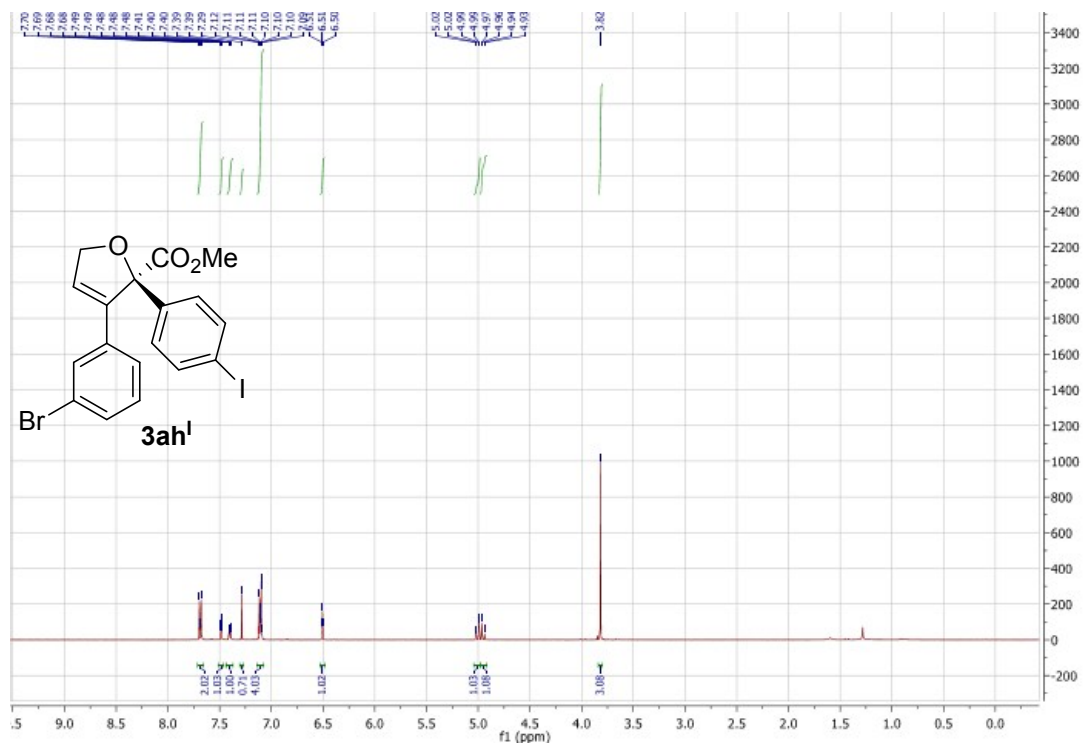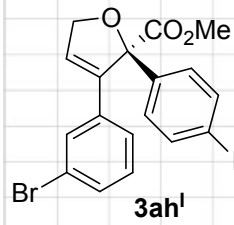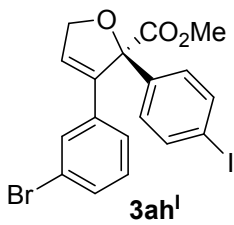

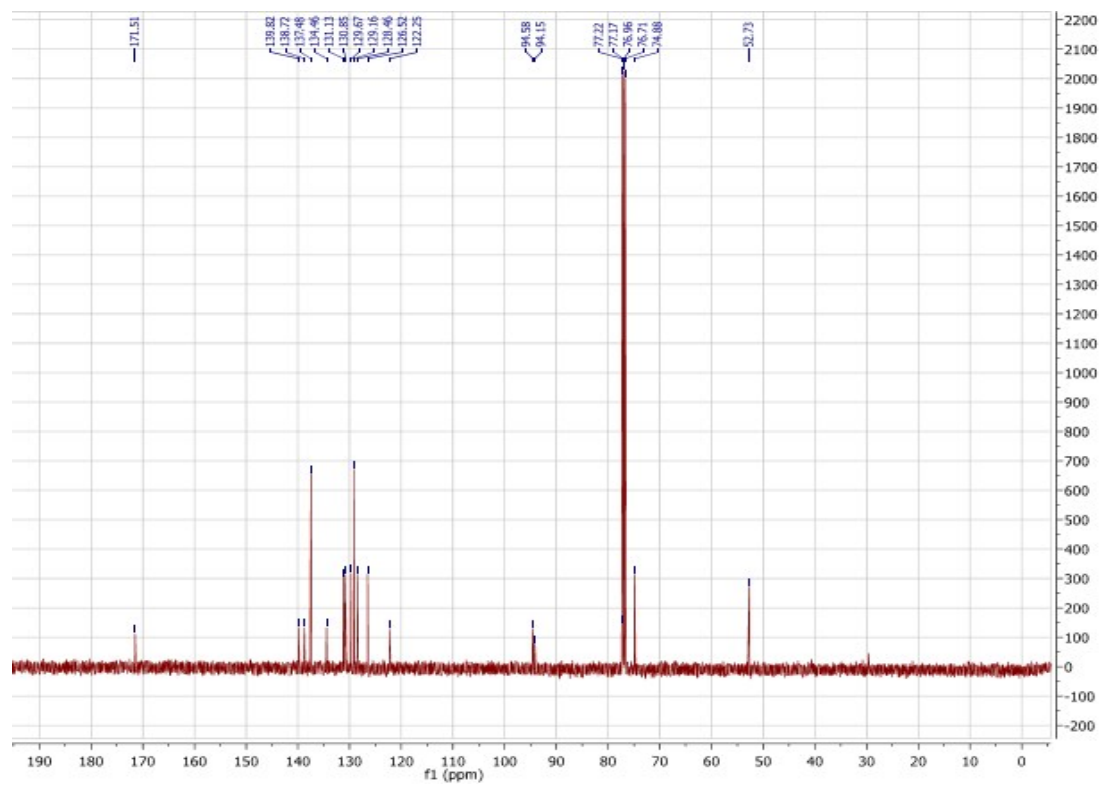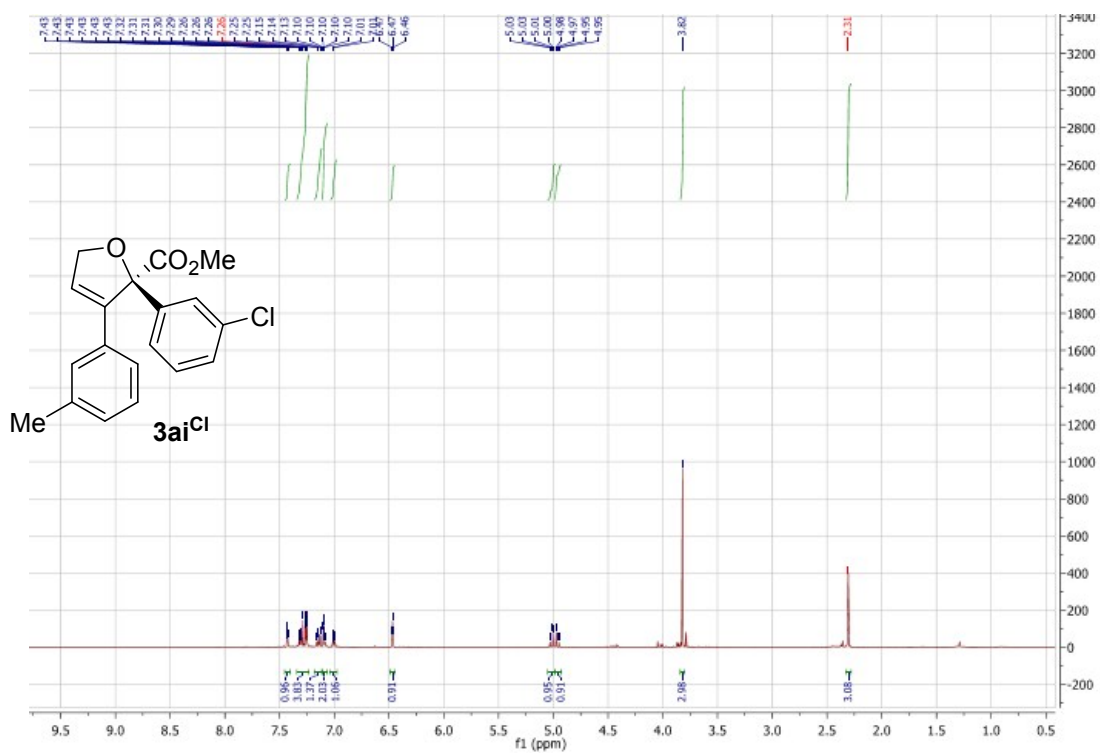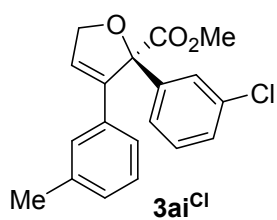



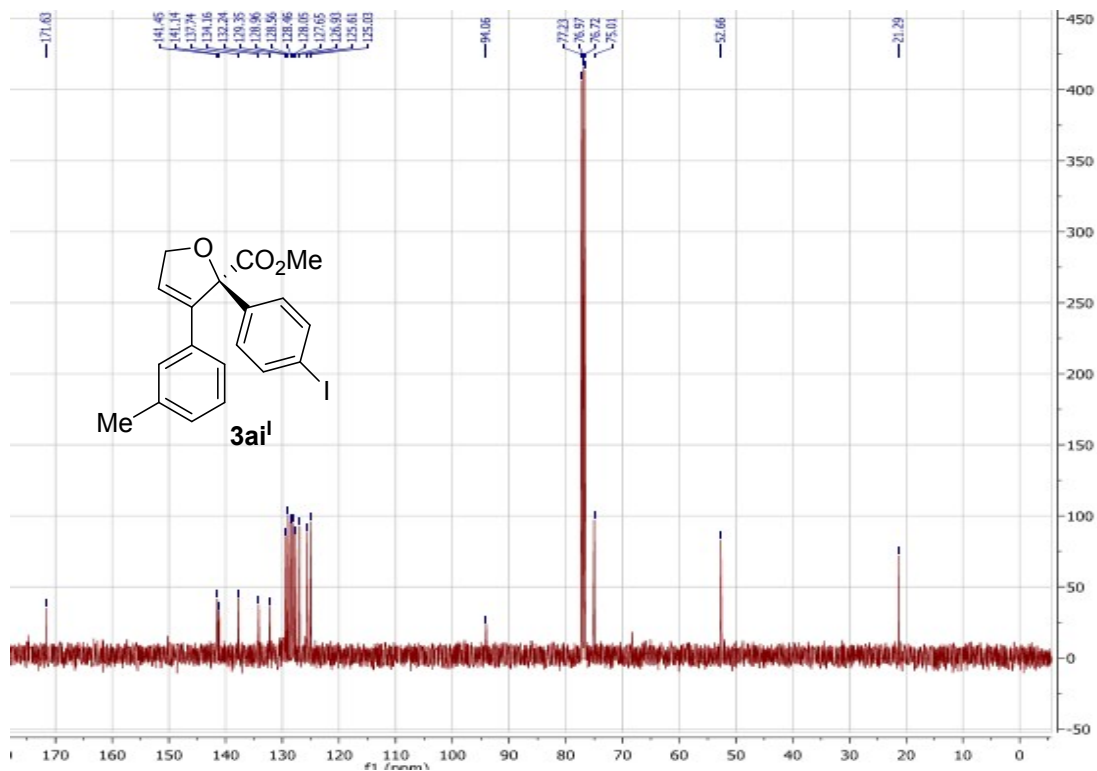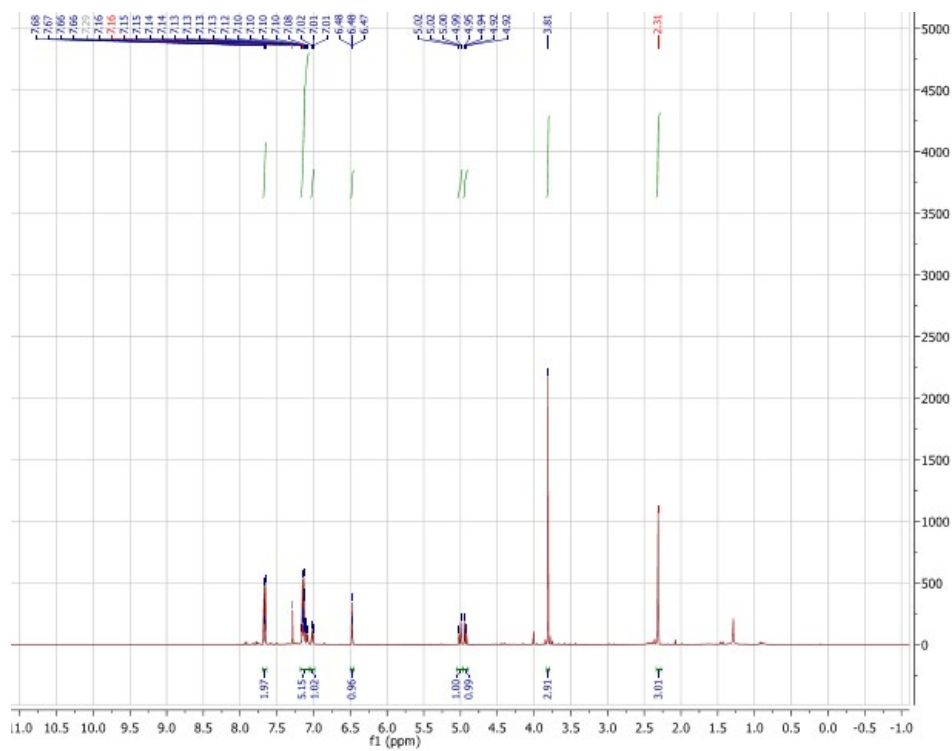

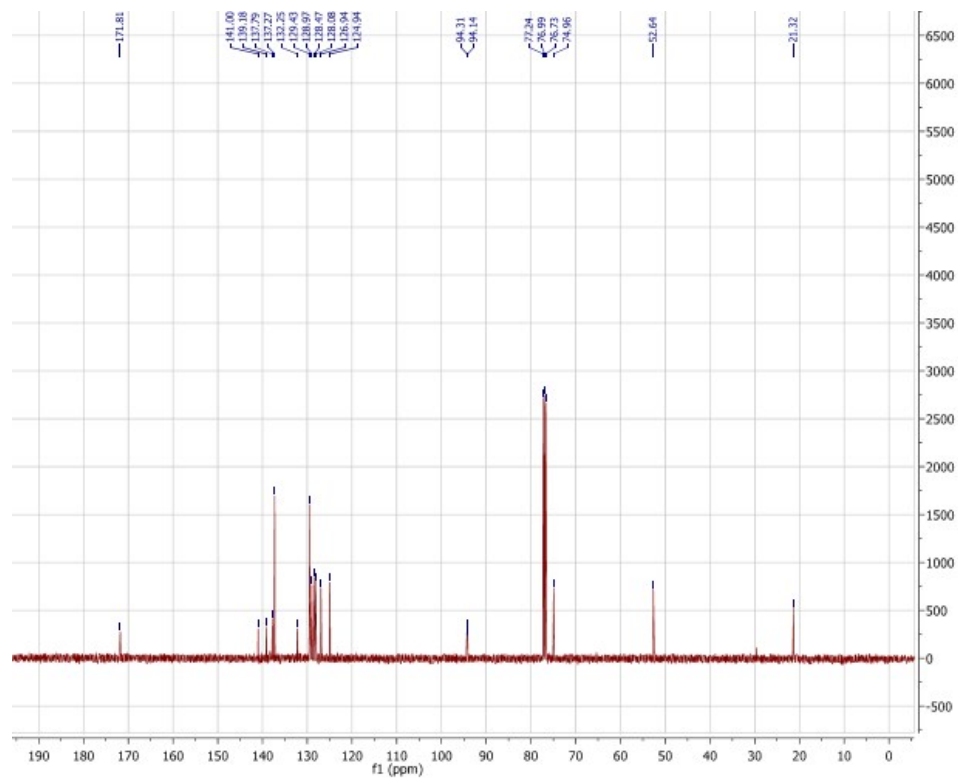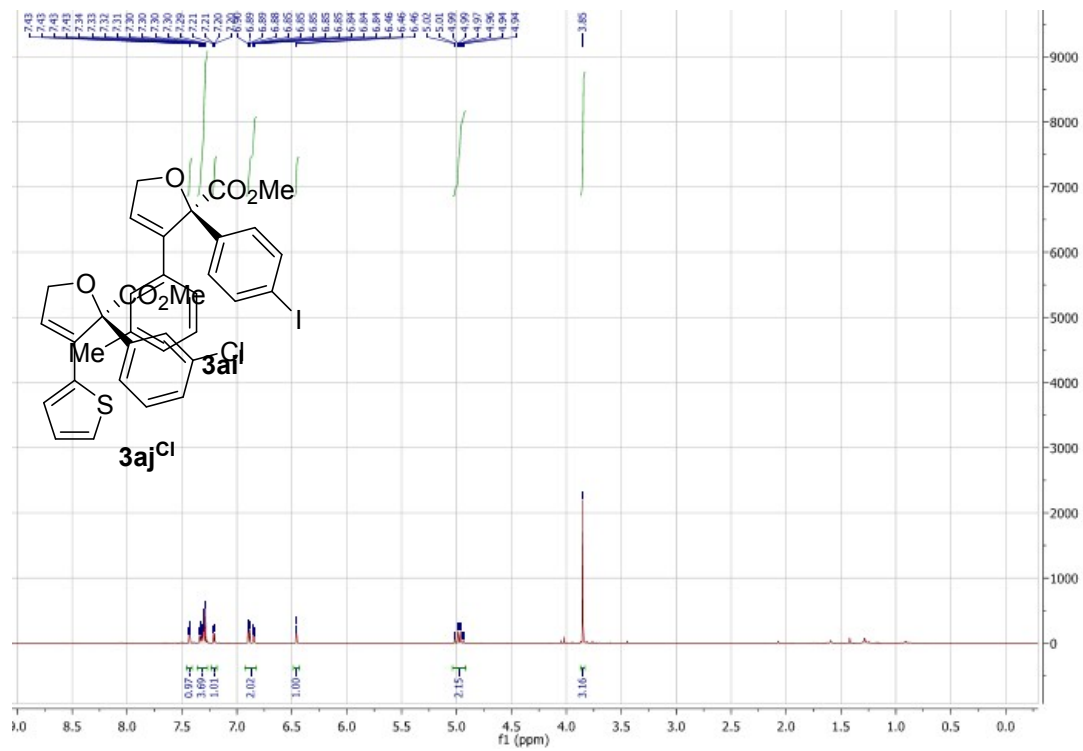

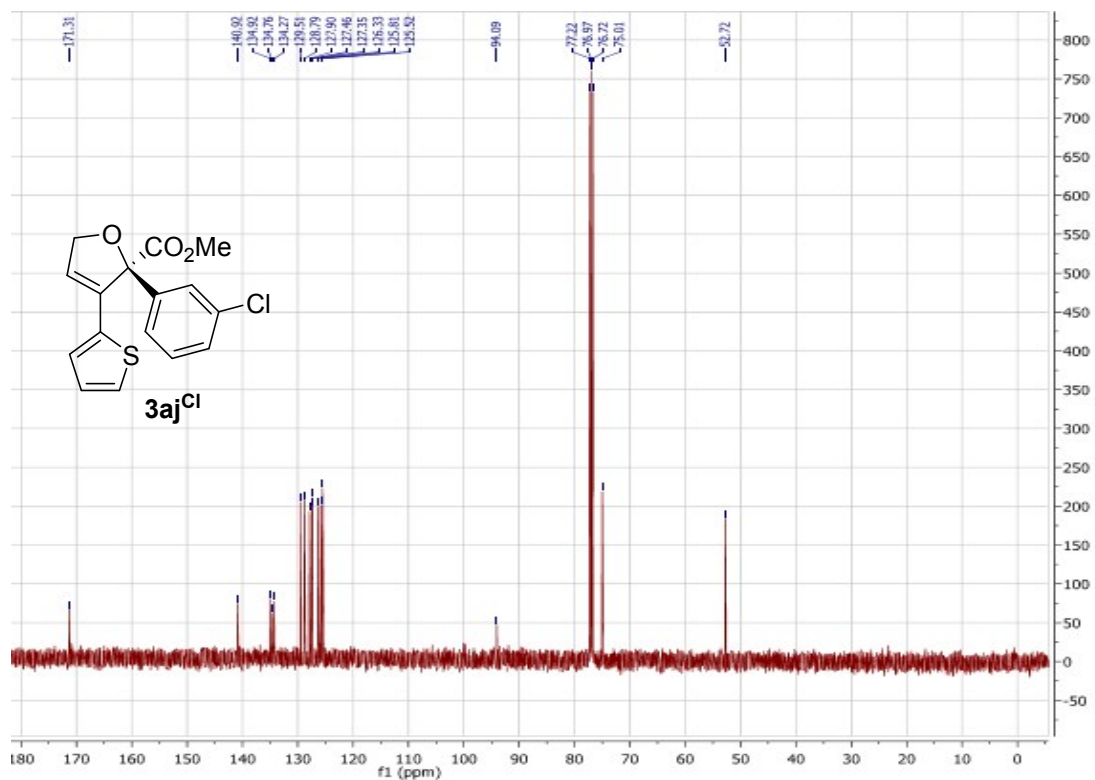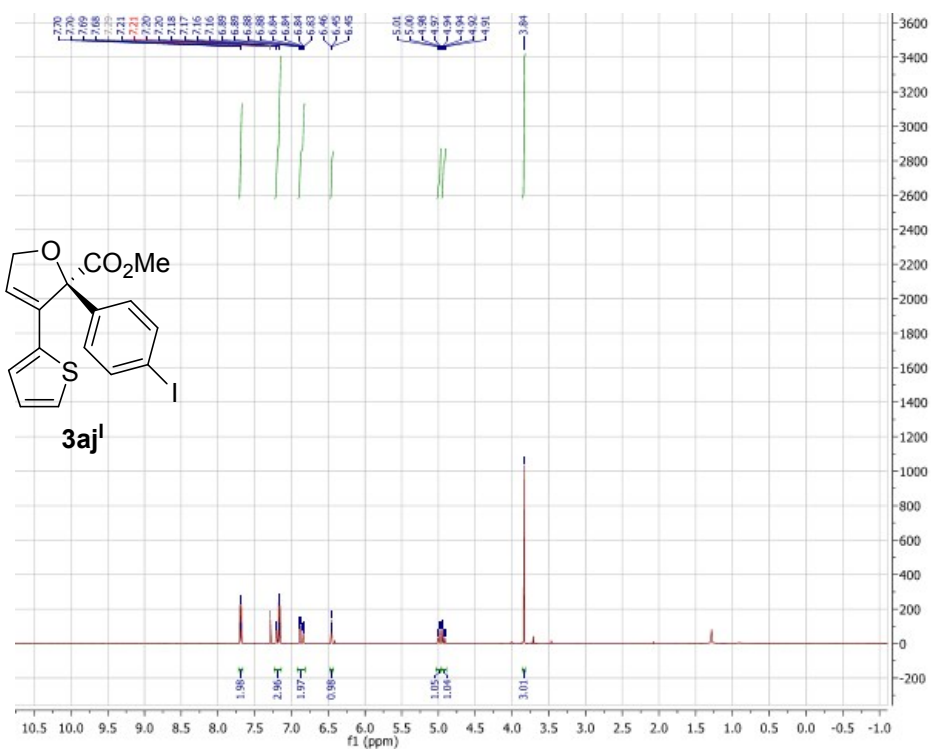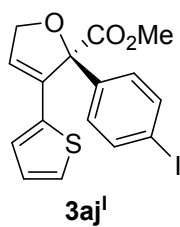

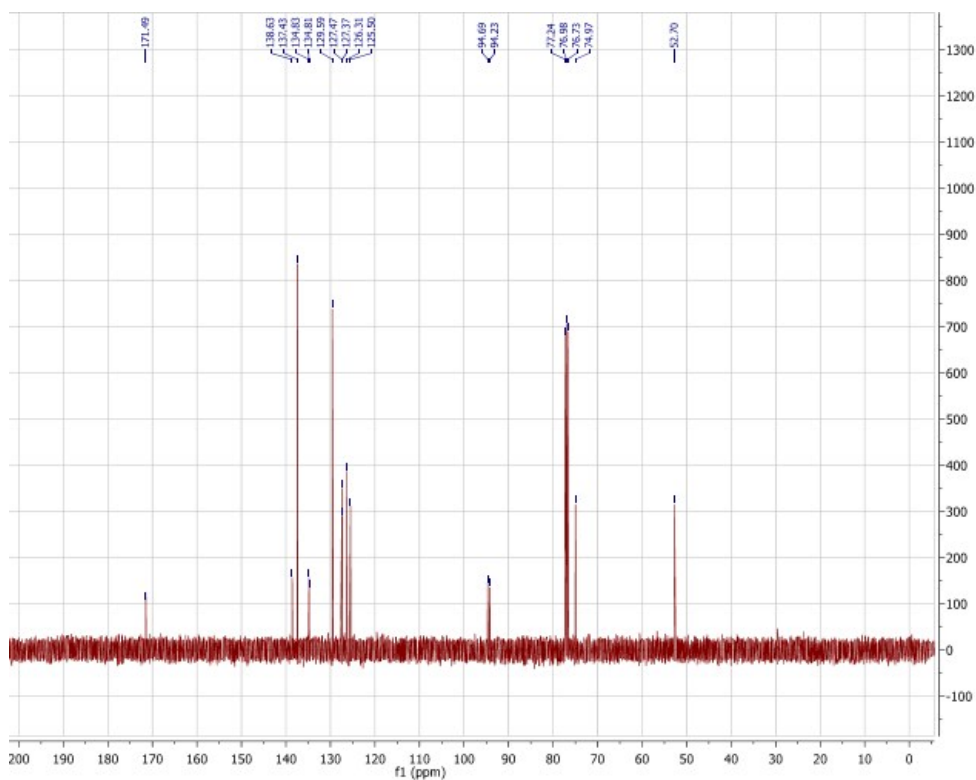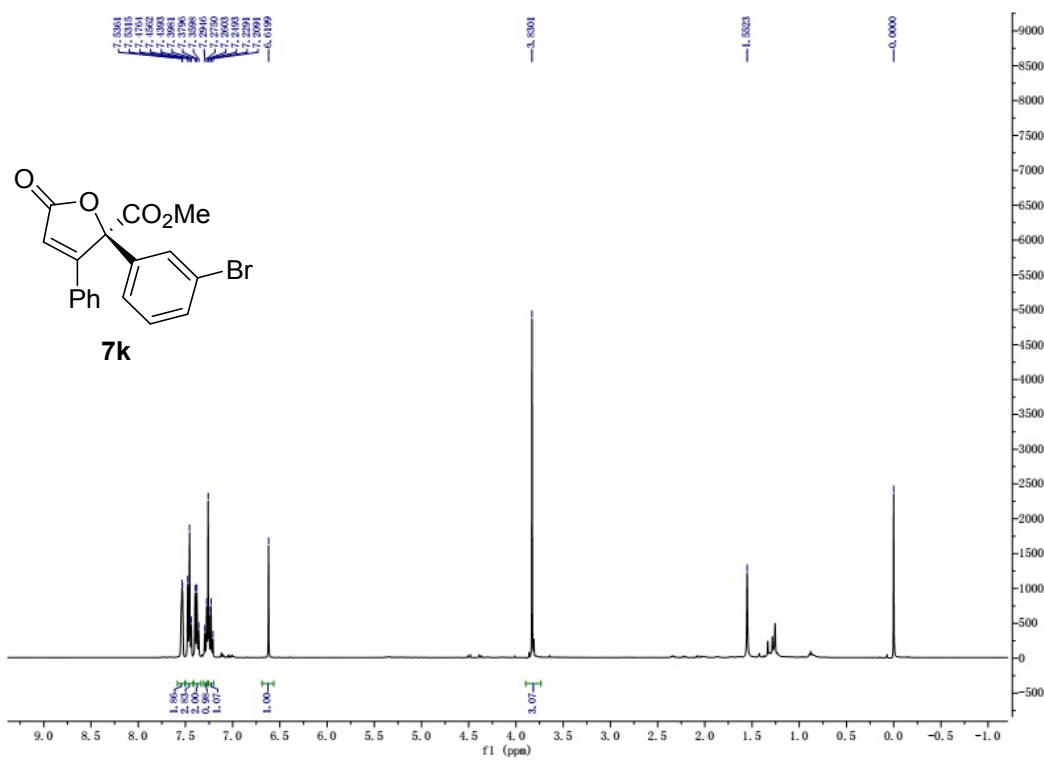

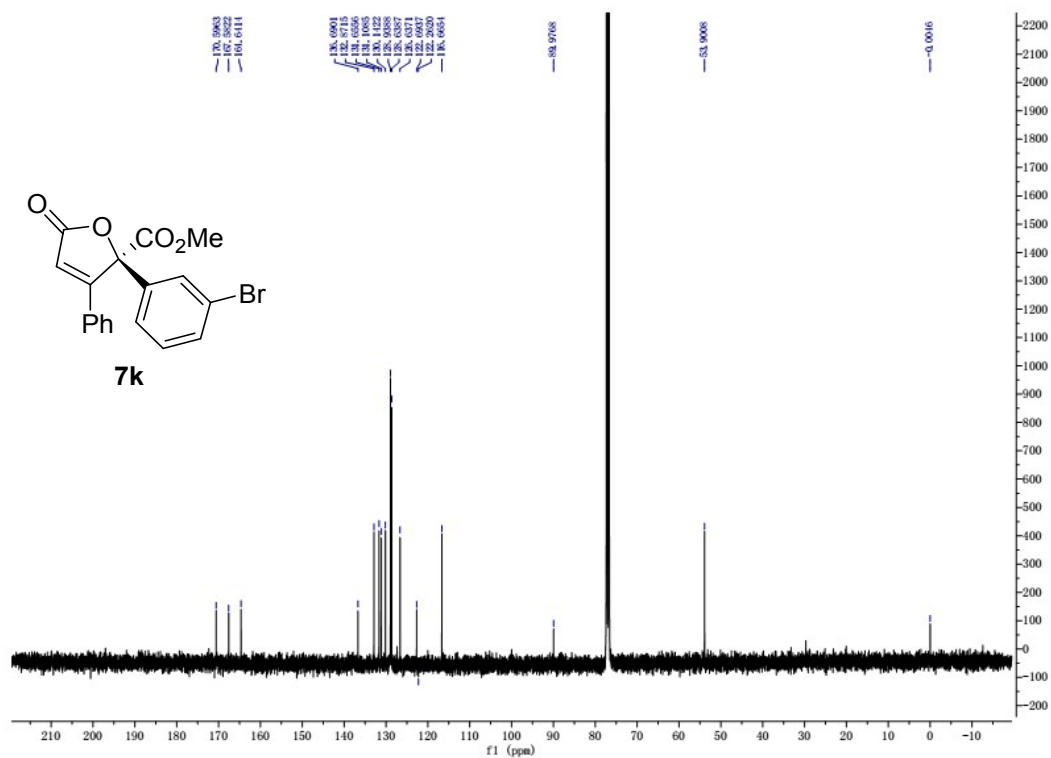

### I. HPLC of 2,5-dihydrofurans

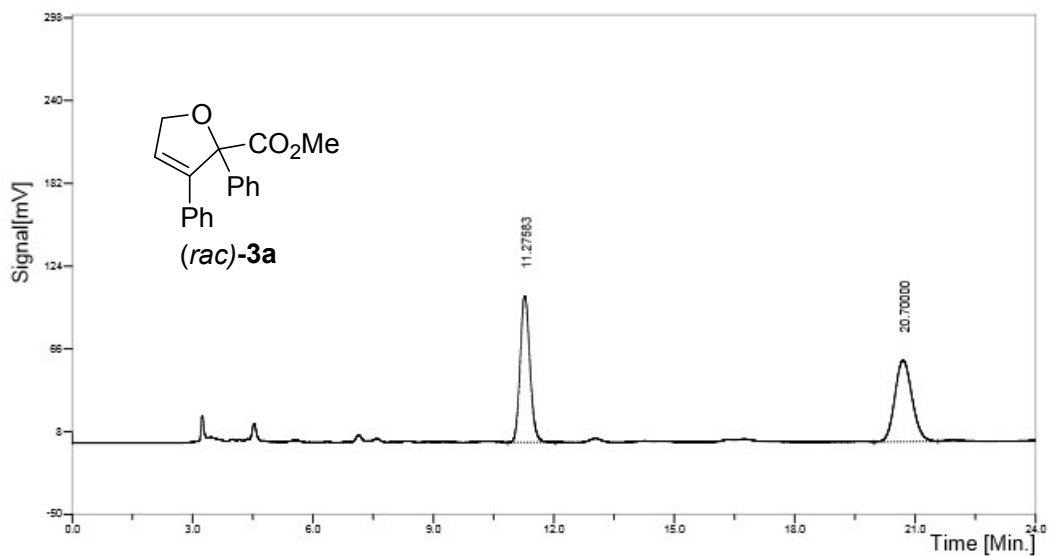

| Peak NO. | Retention time (min) | Peak area (mV.sec) | Percentage of area (%) |
|----------|----------------------|--------------------|------------------------|
| 1        | 11.27583             | 1692.14            | 50.2867                |
| 2        | 20.70000             | 1672.84            | 49.7133                |
| total    |                      | 3364.98            | 100                    |

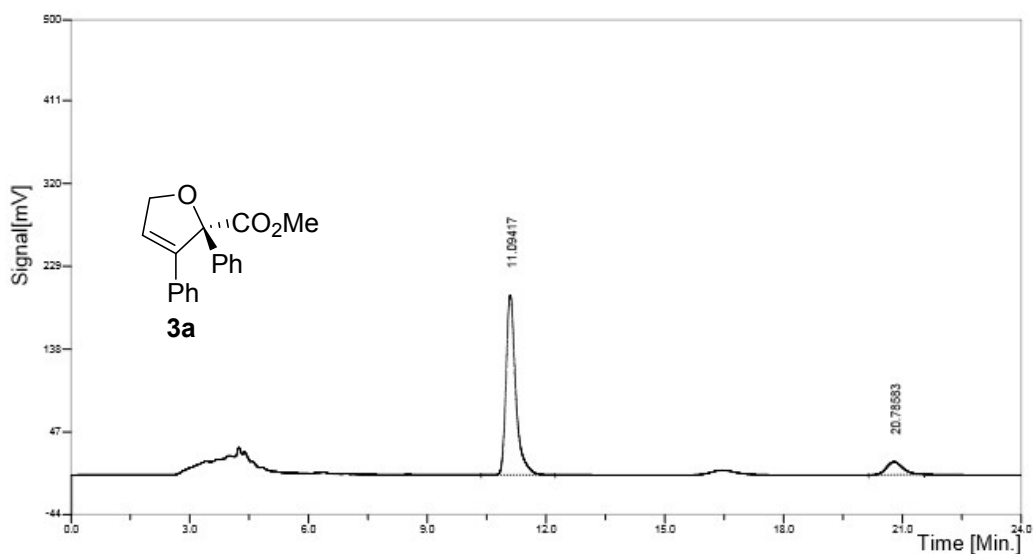

| Peak NO. | Retention time (min) | Peak area (mV.sec) | Percentage of area (%) |
|----------|----------------------|--------------------|------------------------|
| 1        | 11.09417             | 3289.07            | 89.0713                |
| 2        | 20.78583             | 403.56             | 10.9287                |
| total    |                      | 3692.63            | 100                    |

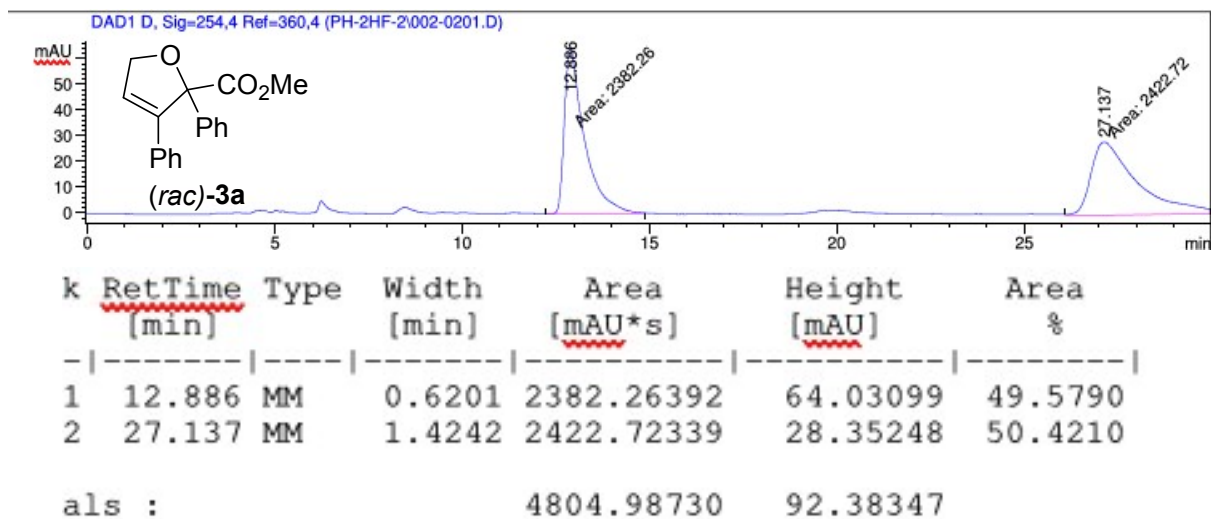

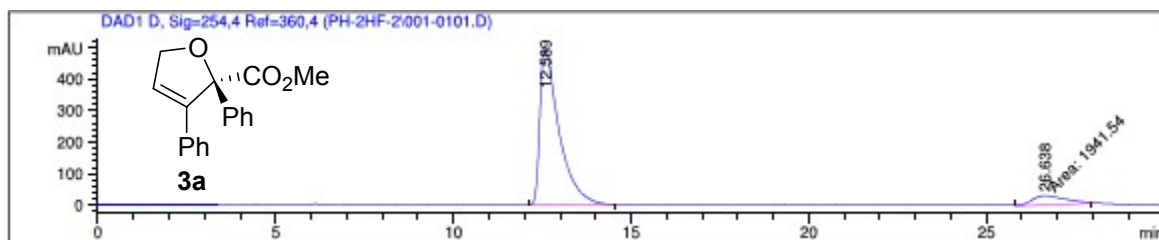

| Peak # | RetTime [min] | Type | Width [min] | Area [mAU*s] | Height [mAU] | Area %  |
|--------|---------------|------|-------------|--------------|--------------|---------|
| 1      | 12.589        | PB   | 0.5300      | 1.86596e4    | 499.29446    | 90.5756 |
| 2      | 26.638        | MM   | 1.0843      | 1941.53723   | 29.84433     | 9.4244  |

Totals : 2.06011e4 529.13879

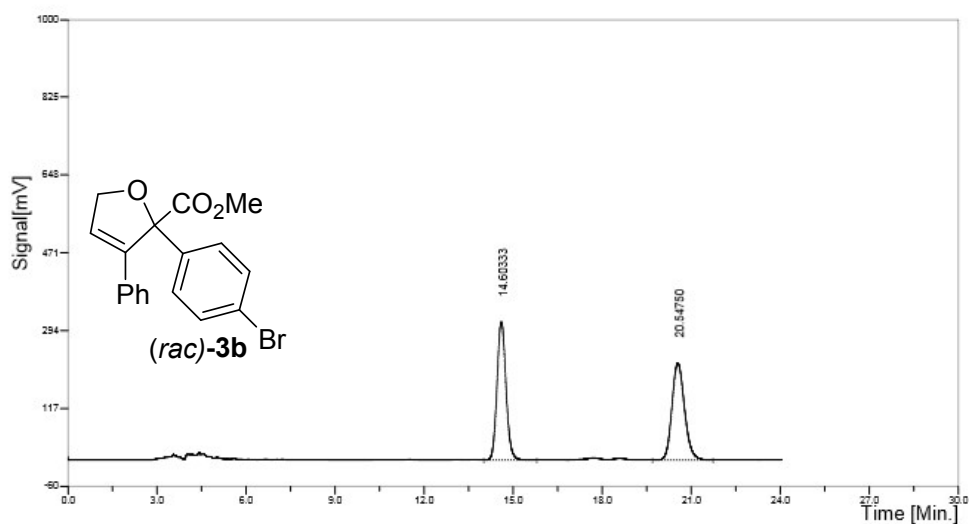

| Peak NO. | Retention time (min) | Peak area (mV.sec) | Percentage of area (%) |
|----------|----------------------|--------------------|------------------------|
| 1        | 14.60333             | 6417.80            | 50.2508                |
| 2        | 20.54750             | 6353.75            | 49.7492                |
| total    |                      | 12771.55           | 100                    |

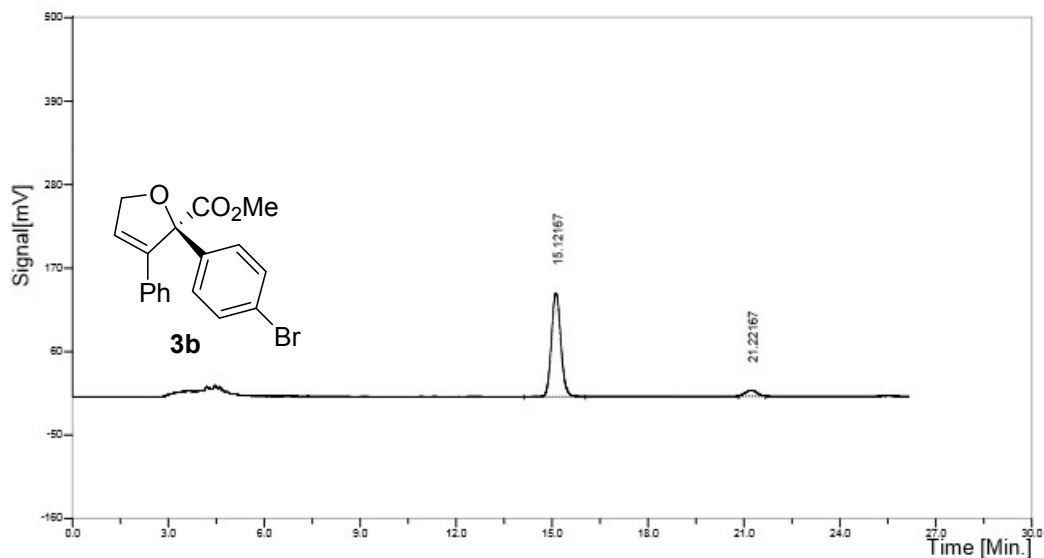

| Peak NO. | Retention time (min) | Peak area (mV.sec) | Percentage of area (%) |
|----------|----------------------|--------------------|------------------------|
| 1        | 15.12167             | 2700.66            | 93.4937                |
| 2        | 21.22167             | 187.94             | 6.5063                 |
| total    |                      | 2888.61            | 100                    |

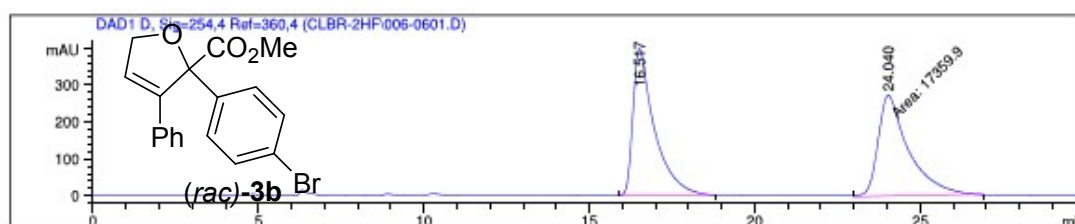

| Peak #   | RetTime [min] | Type | Width [min] | Area [mAU*s] | Height [mAU] | Area %  |
|----------|---------------|------|-------------|--------------|--------------|---------|
| 1        | 16.517        | BB   | 0.6398      | 1.79112e4    | 397.43658    | 50.7815 |
| 2        | 24.040        | MM   | 1.0642      | 1.73599e4    | 271.86606    | 49.2185 |
| Totals : |               |      |             | 3.52711e4    | 669.30264    |         |



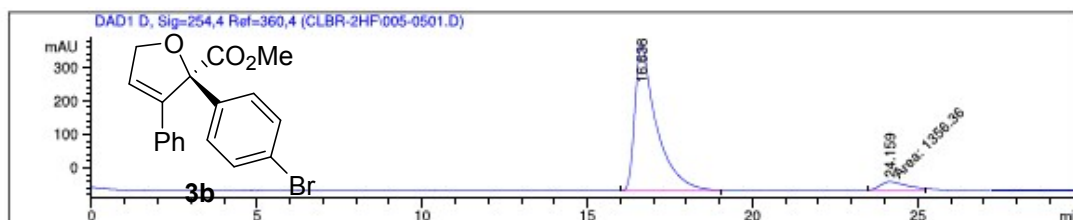

| Peak #   | RetTime [min] | Type | Width [min] | Area [mAU*s] | Height [mAU] | Area %  |
|----------|---------------|------|-------------|--------------|--------------|---------|
| 1        | 16.638        | BB   | 0.6428      | 1.97020e4    | 436.33389    | 93.5590 |
| 2        | 24.159        | MM   | 0.8871      | 1356.36487   | 25.48320     | 6.4410  |
| Totals : |               |      |             | 2.10584e4    | 461.81710    |         |

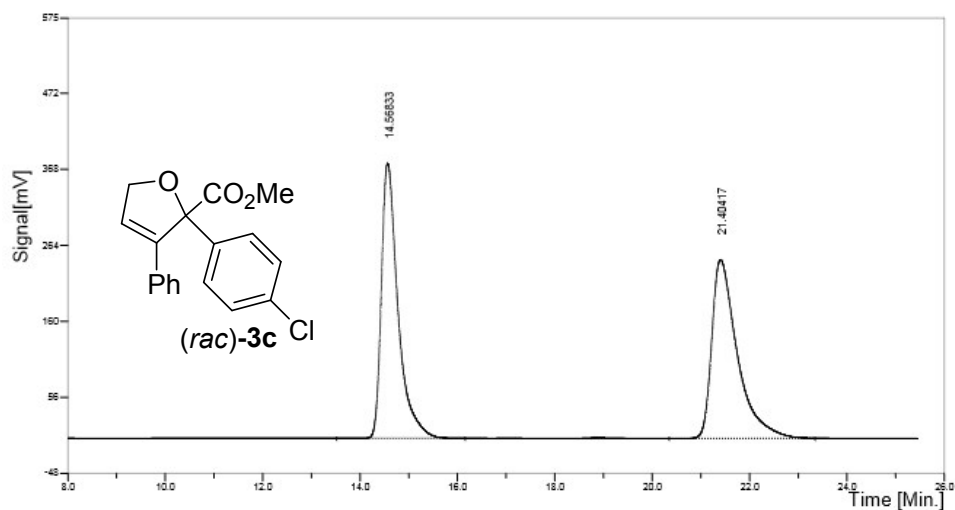

| Peak NO. | Retention time (min) | Peak area (mV.sec) | Percentage of area (%) |
|----------|----------------------|--------------------|------------------------|
| 1        | 14.56833             | 8788.07            | 50.0014                |
| 2        | 21.40417             | 8787.60            | 49.9986                |

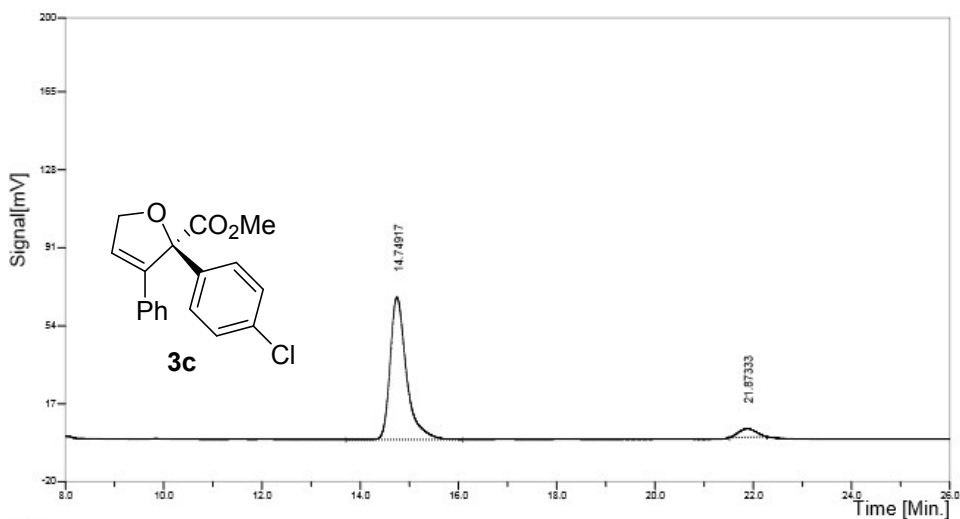

| Peak NO. | Retention time (min) | Peak area (mV.sec) | Percentage of area (%) |
|----------|----------------------|--------------------|------------------------|
| 1        | 14.74917             | 1523.67            | 93.9648                |
| 2        | 21.87333             | 97.86              | 6.0352                 |
| total    |                      | 1621.54            | 100                    |

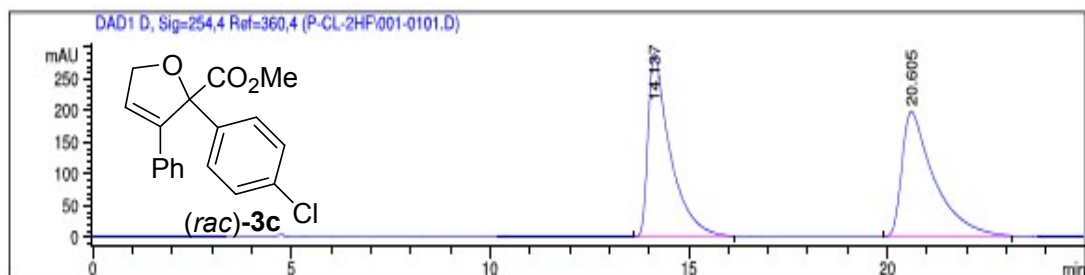

| Peak # | RetTime [min] | Type | Width [min] | Area [mAU*s] | Height [mAU] | Area %  |
|--------|---------------|------|-------------|--------------|--------------|---------|
| 1      | 14.137        | BB   | 0.5483      | 1.12307e4    | 289.69943    | 50.1026 |
| 2      | 20.605        | BB   | 0.8010      | 1.11847e4    | 198.01602    | 49.8974 |

Totals : 2.24153e4 487.71545

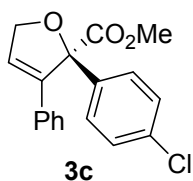

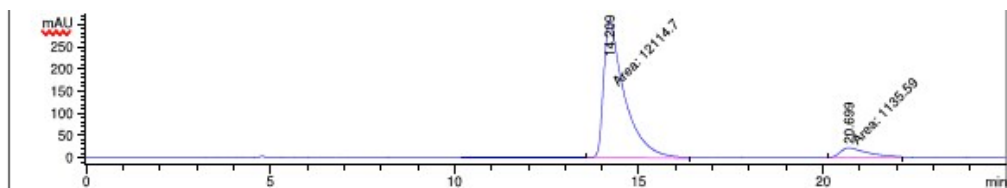

| Peak #   | RetTime [min] | Type | Width [min] | Area [mAU*s] | Height [mAU] | Area %  |
|----------|---------------|------|-------------|--------------|--------------|---------|
| 1        | 14.209        | MM   | 0.6572      | 1.21147e4    | 307.21481    | 91.4297 |
| 2        | 20.699        | MM   | 0.8684      | 1135.59058   | 21.79458     | 8.5703  |
| Totals : |               |      |             | 1.32503e4    | 329.00939    |         |

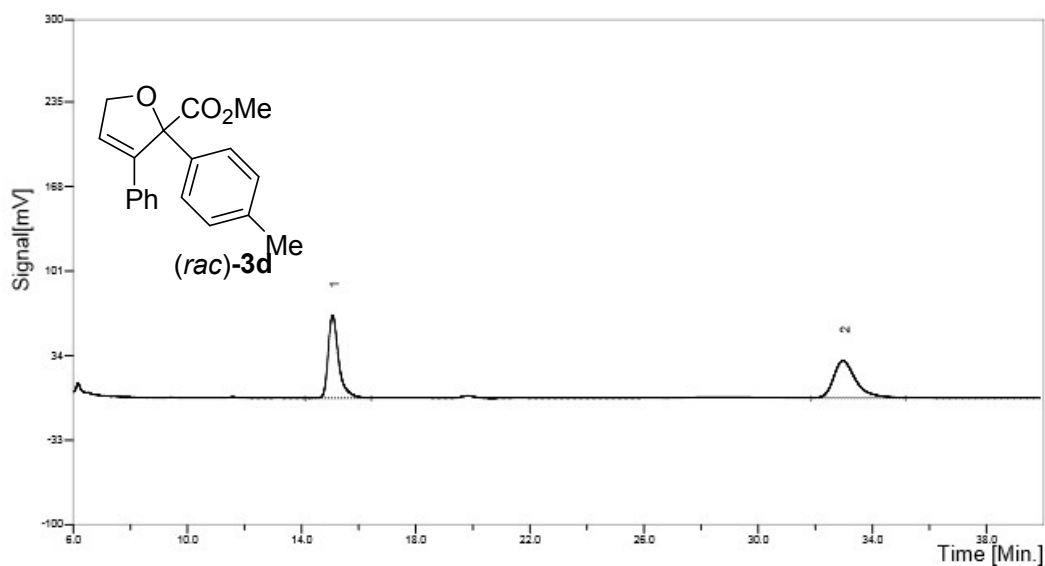

| Peak NO. | Retention time (min) | Peak area (mV.sec) | Percentage of area (%) |
|----------|----------------------|--------------------|------------------------|
| 1        | 15.0900              | 1617.22            | 50.84                  |
| 2        | 32.97250             | 1563.51            | 49.16                  |
| total    |                      | 3180.74            | 100                    |

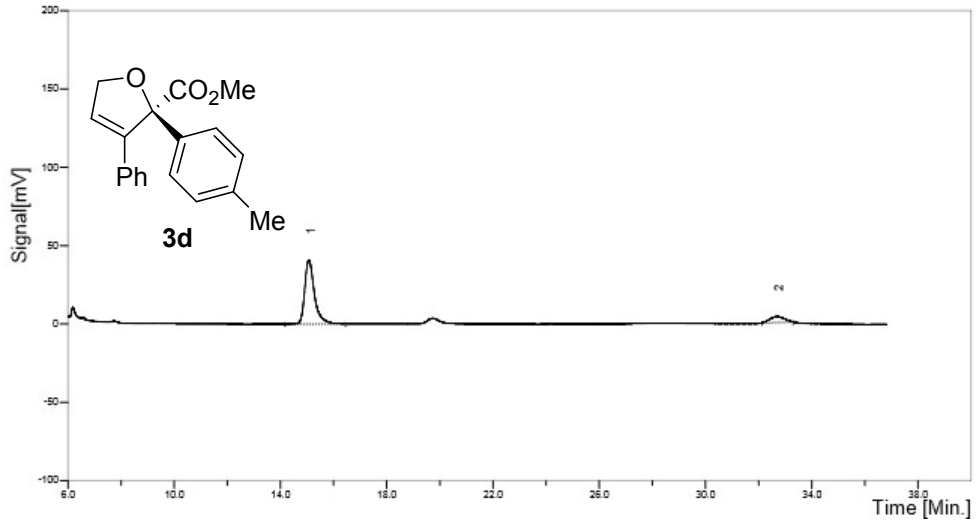

| Peak NO. | Retention time (min) | Peak area (mV.sec) | Percentage of area (%) |
|----------|----------------------|--------------------|------------------------|
| 1        | 15.07417             | 1008.42            | 87.826                 |
| 2        | 32.69750             | 139.76             | 12.1720                |
| total    |                      | 1148.17            | 100                    |

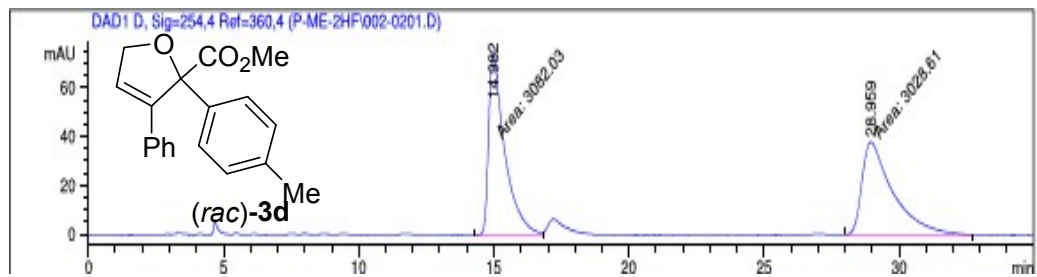

| Peak # | RetTime [min] | Type | Width [min] | Area [mAU*s] | Height [mAU] | Area %  |
|--------|---------------|------|-------------|--------------|--------------|---------|
| 1      | 14.982        | MM   | 0.6822      | 3082.02734   | 75.29202     | 50.4371 |
| 2      | 28.959        | MM   | 1.3227      | 3028.61255   | 38.16206     | 49.5629 |

Totals : 6110.63989 113.45407

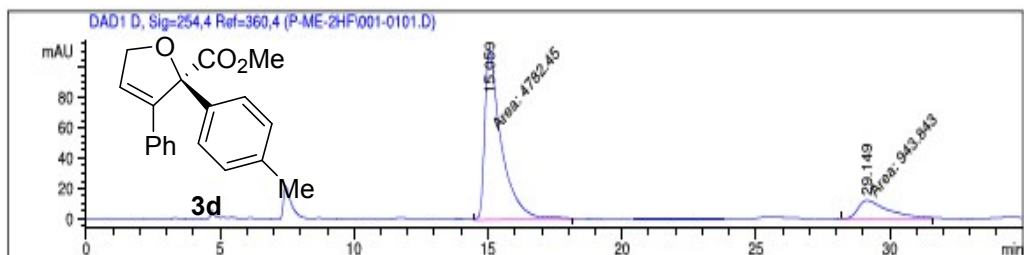

| Peak # | RetTime [min] | Type | Width [min] | Area [mAU*s] | Height [mAU] | Area %  |
|--------|---------------|------|-------------|--------------|--------------|---------|
| 1      | 15.059        | MM   | 0.7117      | 4782.45361   | 111.99453    | 83.5174 |
| 2      | 29.149        | MM   | 1.2811      | 943.84296    | 12.27935     | 16.4826 |

Totals : 5726.29657 124.27388

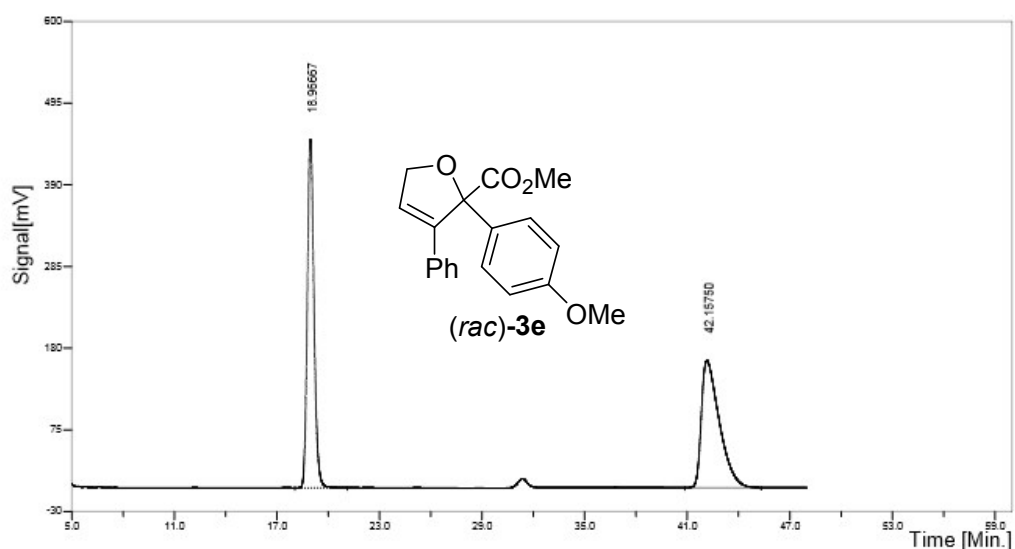

| Peak NO. | Retention time (min) | Peak area (mV.sec) | Percentage of area |
|----------|----------------------|--------------------|--------------------|
|----------|----------------------|--------------------|--------------------|

|       |          |          | (%)     |
|-------|----------|----------|---------|
| 1     | 18.96667 | 11745.68 | 49.8801 |
| 2     | 42.15750 | 11802.16 | 50.1199 |
| total |          | 23547.84 | 100     |

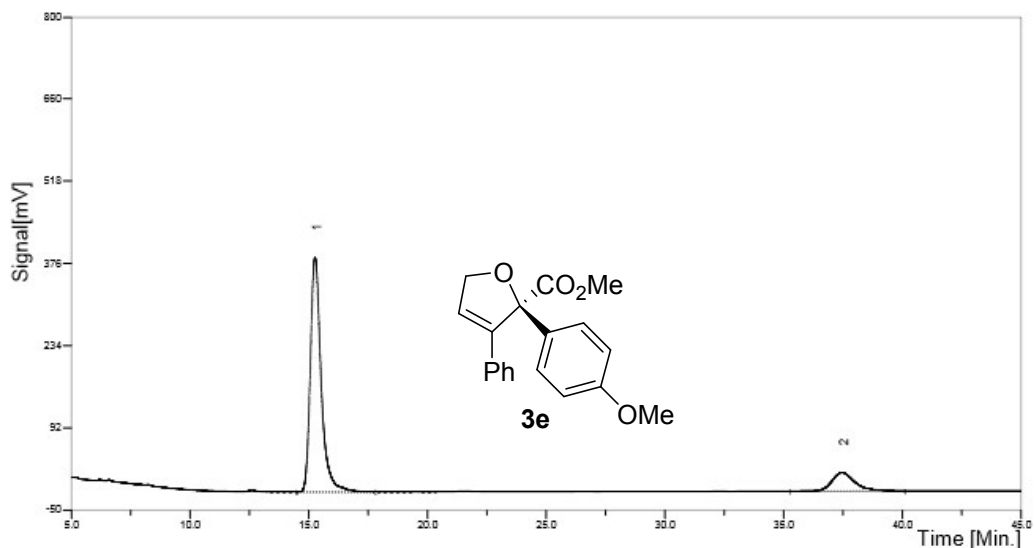

| Peak NO. | Retention time (min) | Peak area (mV.sec) | Percentage of area (%) |
|----------|----------------------|--------------------|------------------------|
| 1        | 15.26250             | 12538.32           | 85.3815                |
| 2        | 37.45500             | 2146.73            | 14.6185                |
| total    |                      | 14685.05           | 100                    |

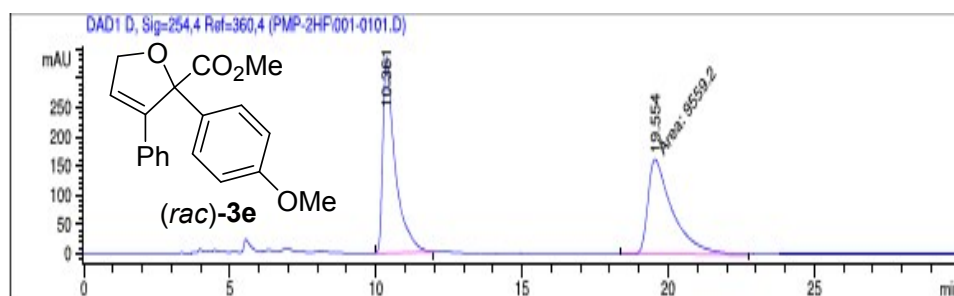

| Peak # | RetTime [min] | Type | Width [min] | Area [mAU*s] | Height [mAU] | Area %  |
|--------|---------------|------|-------------|--------------|--------------|---------|
| 1      | 10.361        | BB   | 0.4148      | 9783.11914   | 334.94330    | 50.5788 |
| 2      | 19.554        | MM   | 0.9815      | 9559.20020   | 162.32405    | 49.4212 |

Totals : 1.93423e4 497.26735

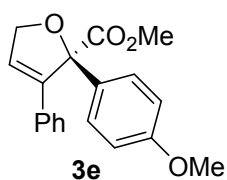

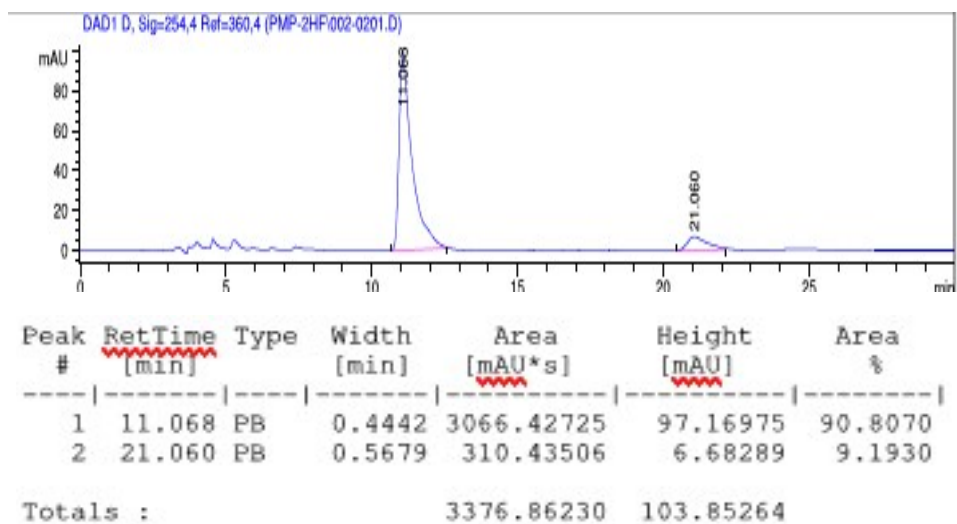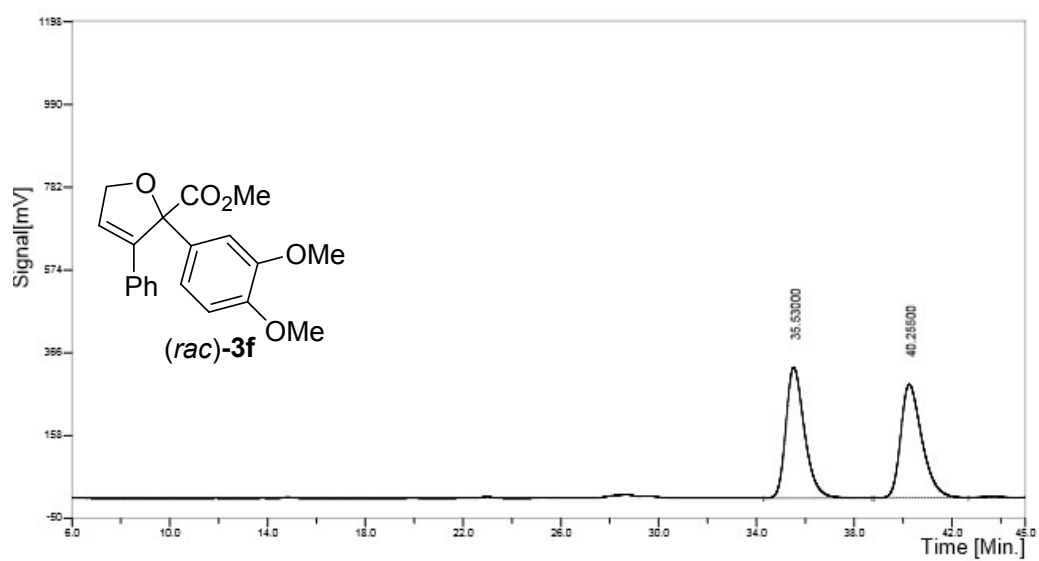

| Peak NO. | Retention time (min) | Peak area (mV.sec) | Percentage of area (%) |
|----------|----------------------|--------------------|------------------------|
| 1        | 35.53000             | 17204.81           | 50.2179                |
| 2        | 40.255500            | 17055.52           | 49.7821                |
| total    |                      | 34260.33           | 100                    |

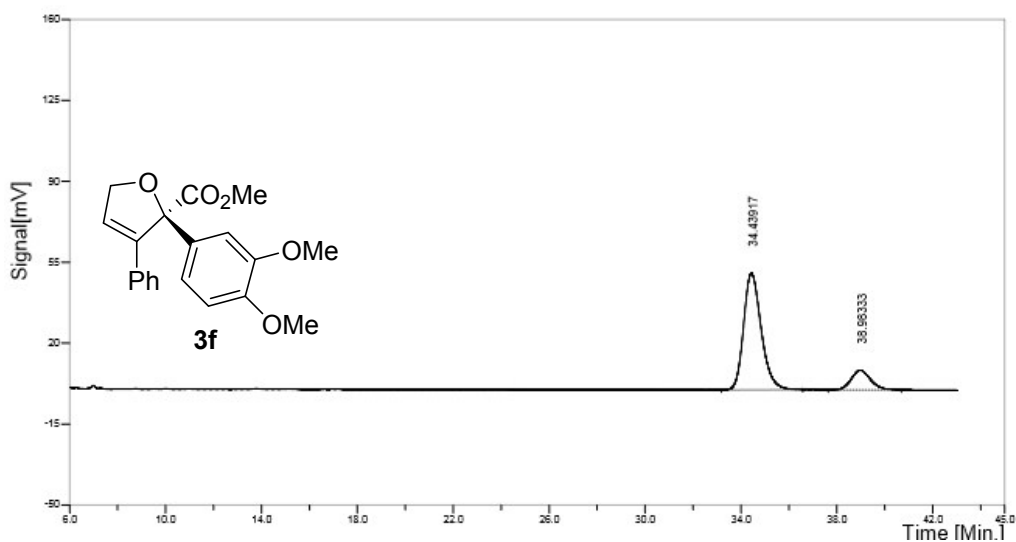

| Peak NO. | Retention time (min) | Peak area (mV.sec) | Percentage of area (%) |
|----------|----------------------|--------------------|------------------------|
| 1        | 34.43917             | 2547.98            | 84.3564                |
| 2        | 38.98333             | 472.51             | 15.6436                |
| total    |                      | 3020.49            | 100                    |

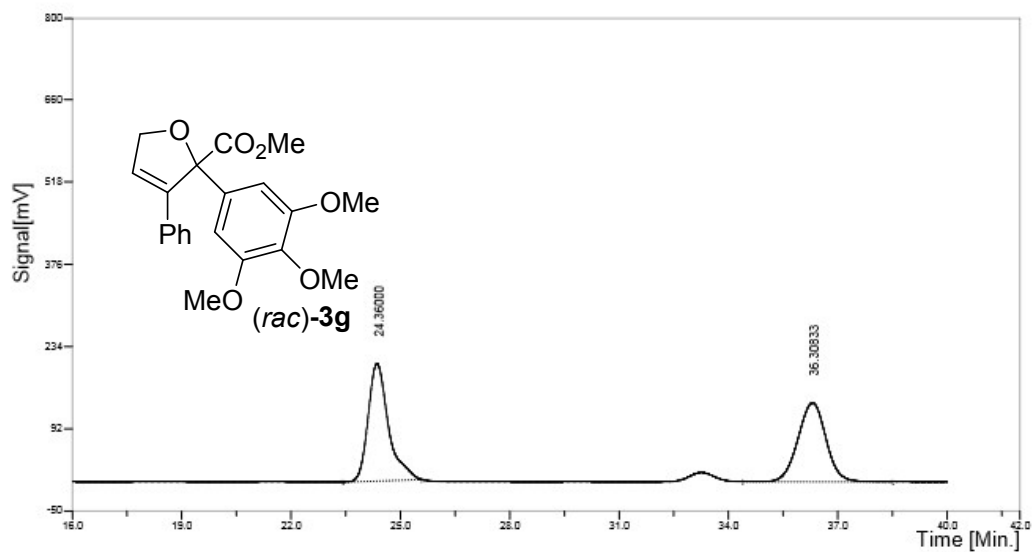



| Peak NO. | Retention time (min) | Peak area (mV.sec) | Percentage of area (%) |
|----------|----------------------|--------------------|------------------------|
| 1        | 24.36000             | 7766.39            | 51.7724                |
| 2        | 36.30833             | 7234.64            | 48.2276                |
| total    |                      | 15001.03           | 100                    |

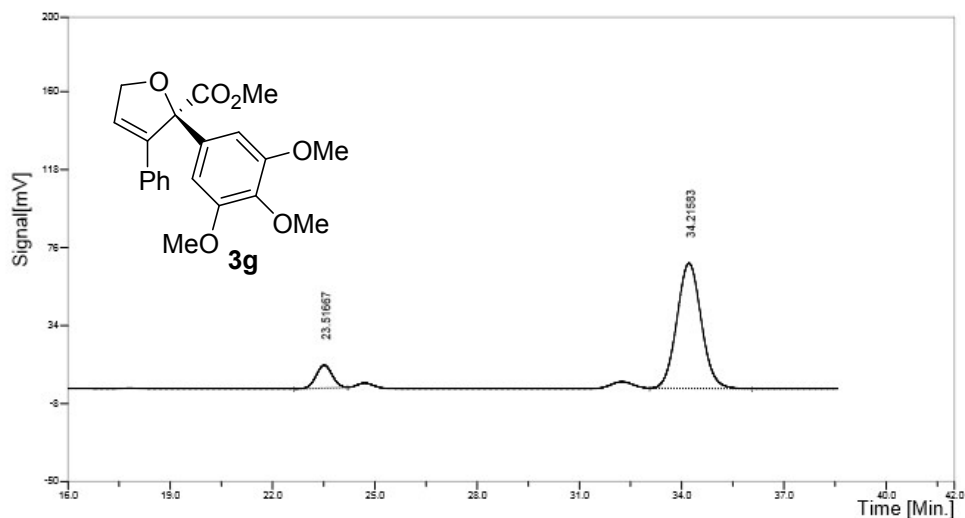

| Peak NO. | Retention time (min) | Peak area (mV.sec) | Percentage of area (%) |
|----------|----------------------|--------------------|------------------------|
| 1        | 23.51667             | 396.60             | 10.6443                |
| 2        | 34.21583             | 3329.32            | 89.3557                |
| total    |                      | 3725.92            | 100                    |

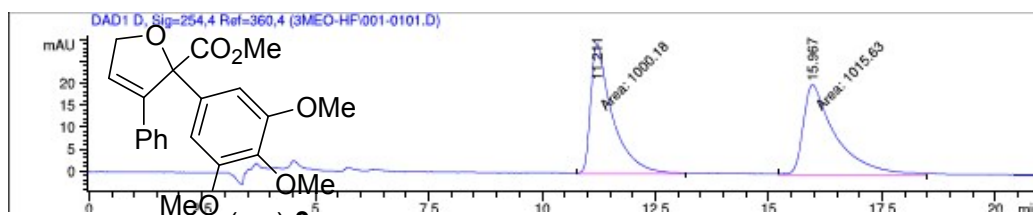

| Peak # | RetTime [min] | Type | Width [min] | Area [mAU*s] | Height [mAU] | Area %  |
|--------|---------------|------|-------------|--------------|--------------|---------|
| 1      | 11.211        | MM   | 0.5603      | 1000.18292   | 29.74970     | 49.6168 |
| 2      | 15.967        | MM   | 0.8269      | 1015.63086   | 20.47054     | 50.3832 |

Totals : 2015.81378 50.22024

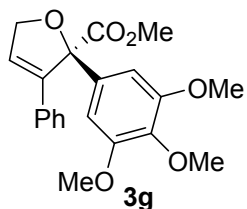

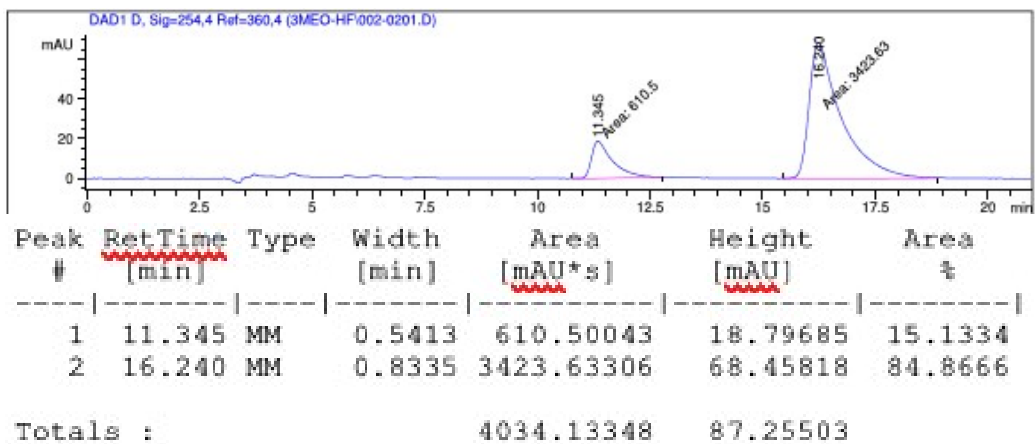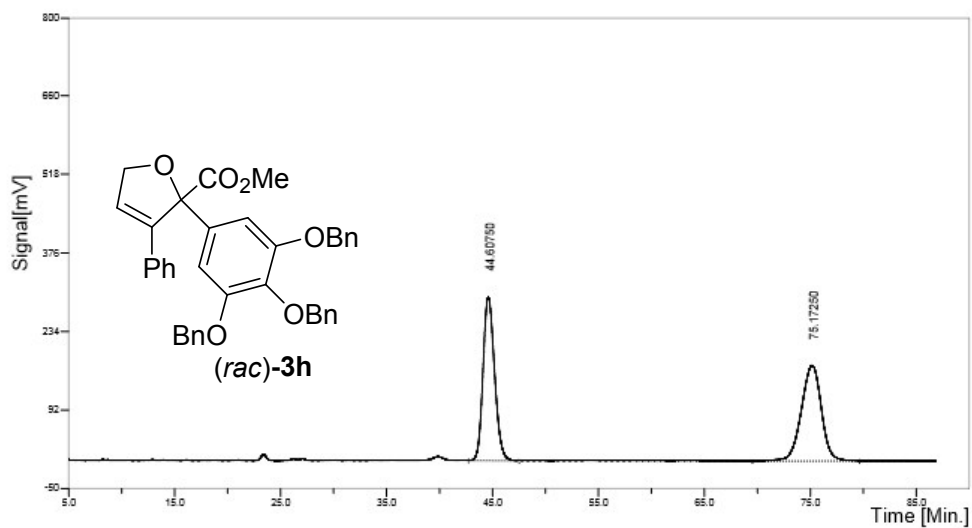

| Peak NO. | Retention time (min) | Peak area (mV.sec) | Percentage of area (%) |
|----------|----------------------|--------------------|------------------------|
| 1        | 44.60750             | 21969.15           | 49.3153                |
| 2        | 75.17250             | 22579.16           | 50.6847                |
| total    |                      | 44548.31           | 100                    |

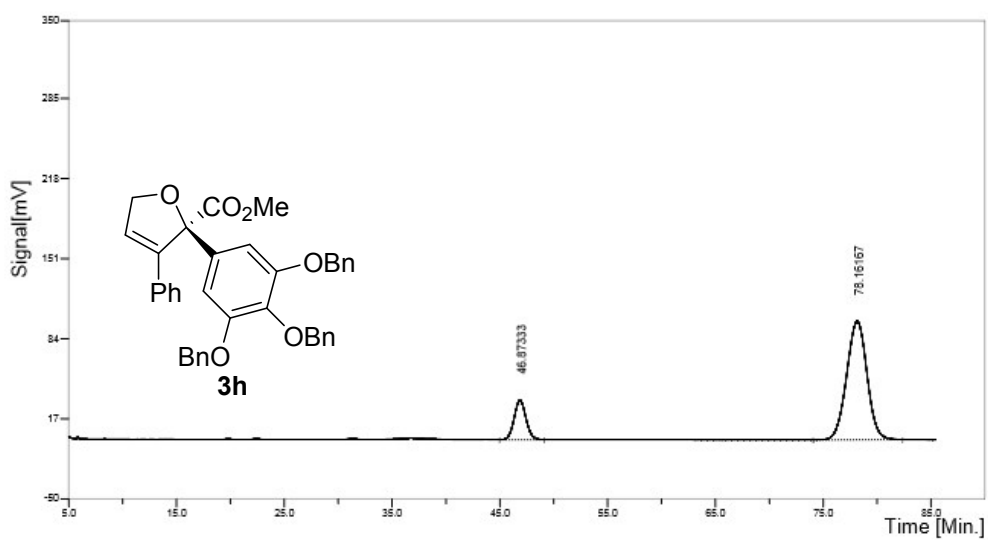

| Peak NO. | Retention time (min) | Peak area (mV.sec) | Percentage of area (%) |
|----------|----------------------|--------------------|------------------------|
| 1        | 46.87333             | 2494.37            | 16.1111                |
| 2        | 78.16167             | 12987.94           | 83.8889                |
| total    |                      | 15482.32           | 100                    |

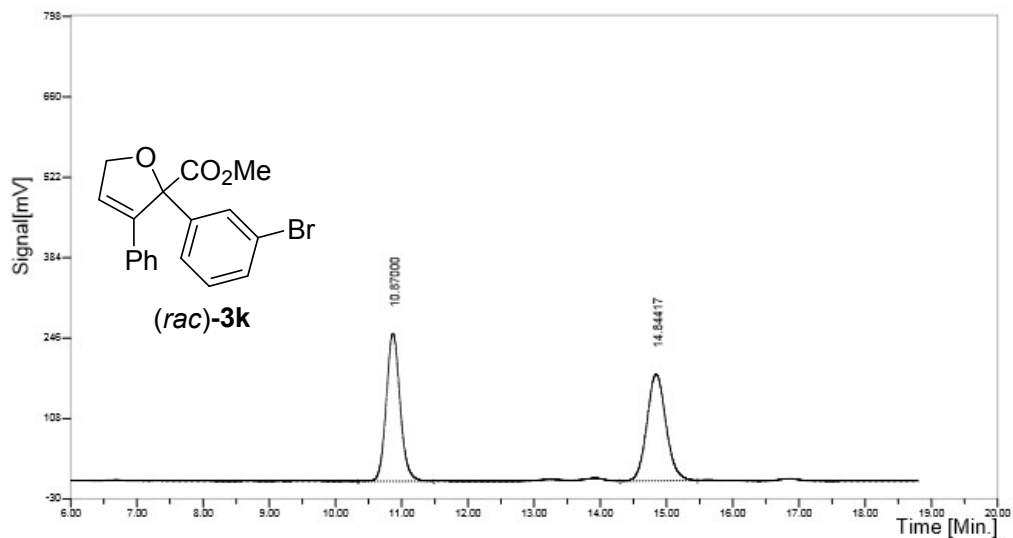

| Peak NO. | Retention time (min) | Peak area (mV.sec) | Percentage of area (%) |
|----------|----------------------|--------------------|------------------------|
| 1        | 10.87000             | 3628.98            | 50.0720                |
| 2        | 14.84417             | 3618.53            | 49.9280                |
| total    |                      | 7247.51            | 100                    |

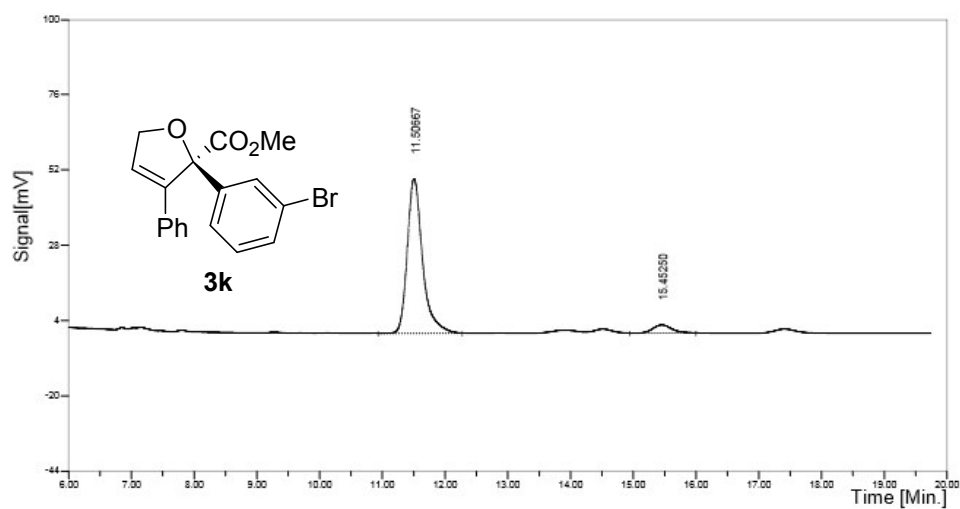

| Peak NO. | Retention time (min) | Peak area (mV.sec) | Percentage of area (%) |
|----------|----------------------|--------------------|------------------------|
| 1        | 11.50667             | 820.22             | 94.0869                |
| 2        | 15.45250             | 51.55              | 5.9131                 |
| total    |                      | 871.77             | 100                    |

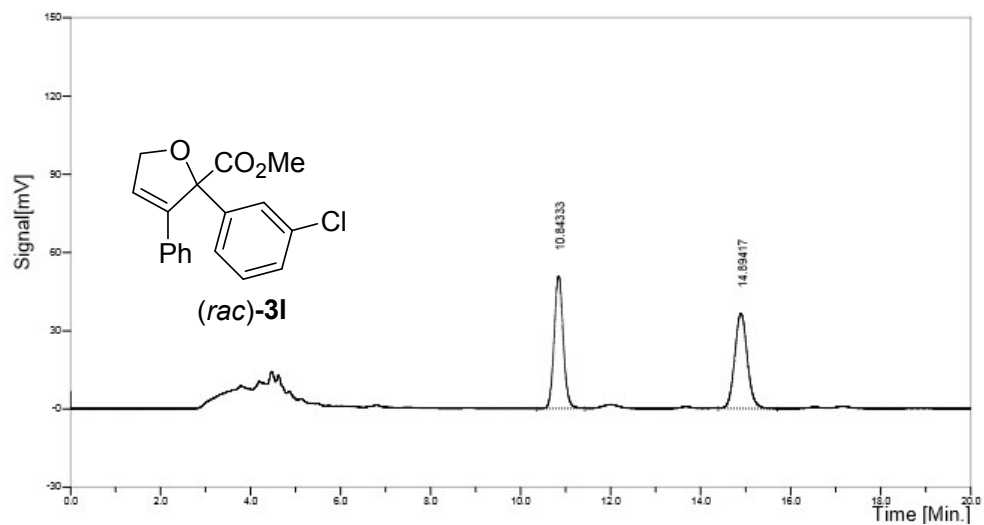

| Peak NO. | Retention time (min) | Peak area (mV.sec) | Percentage of area (%) |
|----------|----------------------|--------------------|------------------------|
| 1        | 10.84333             | 693.46             | 50.0540                |
| 2        | 14.89417             | 691.96             | 49.9460                |
| total    |                      | 1385.96            | 100                    |

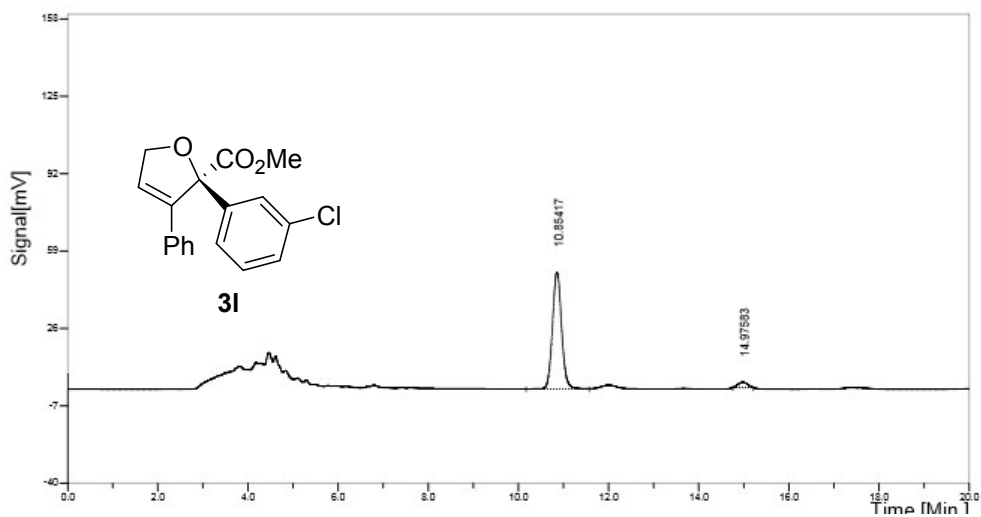

| Peak NO. | Retention time (min) | Peak area (mV.sec) | Percentage of area (%) |
|----------|----------------------|--------------------|------------------------|
| 1        | 10.85417             | 679.18             | 95.2978                |
| 2        | 14.97583             | 33.51              | 4.7022                 |
| total    |                      | 712.69             | 100                    |

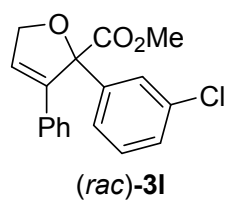

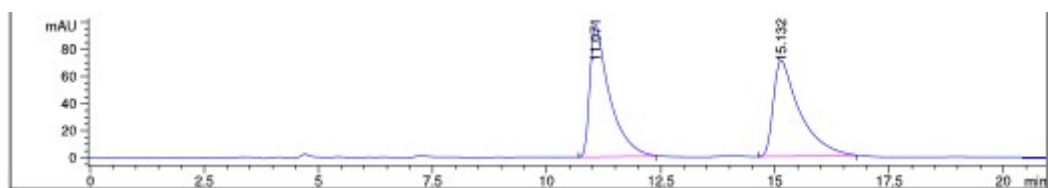

| Peak # | RetTime [min] | Type | Width [min] | Area [mAU*s] | Height [mAU] | Area %  |
|--------|---------------|------|-------------|--------------|--------------|---------|
| 1      | 11.071        | BB   | 0.4208      | 2928.32251   | 97.38730     | 50.4768 |
| 2      | 15.132        | PB   | 0.5696      | 2873.00220   | 71.07188     | 49.5232 |

Totals : 5801.32471 168.45918

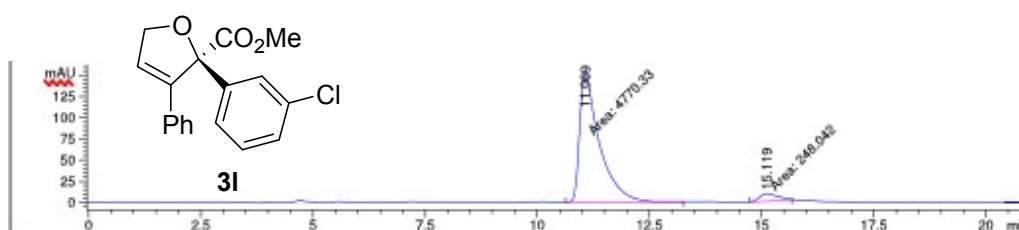

| Peak # | RetTime [min] | Type | Width [min] | Area [mAU*s] | Height [mAU] | Area %  |
|--------|---------------|------|-------------|--------------|--------------|---------|
| 1      | 11.069        | MM   | 0.5157      | 4770.33398   | 154.17871    | 95.0573 |
| 2      | 15.119        | MM   | 0.4750      | 248.04237    | 8.70309      | 4.9427  |

Totals : 5018.37636 162.88180

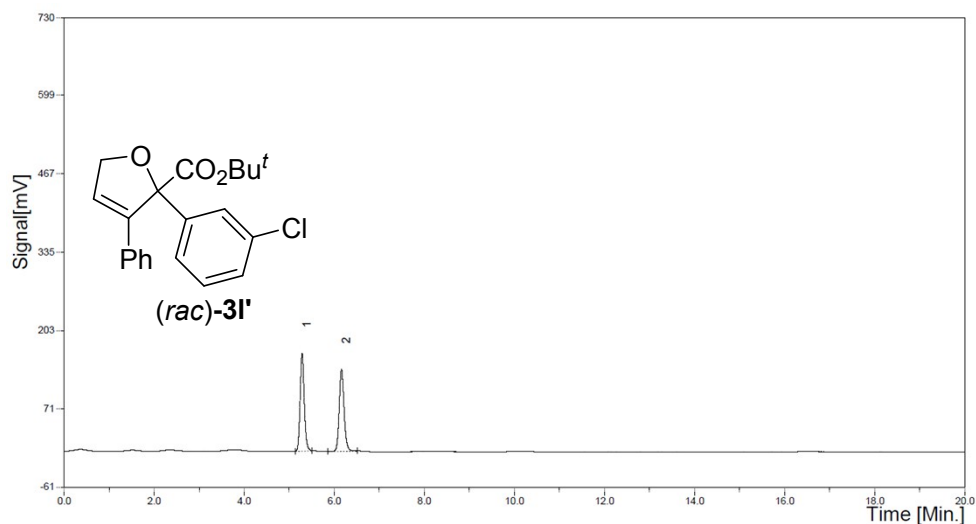

| Peak NO. | Retention time (min) | Peak area (mV.sec) | Percentage of area (%) |
|----------|----------------------|--------------------|------------------------|
| 1        | 5.28417              | 1044.22            | 50.4962                |
| 2        | 6.15917              | 1023.69            | 49.5038                |
| total    |                      | 2067.91            | 100                    |

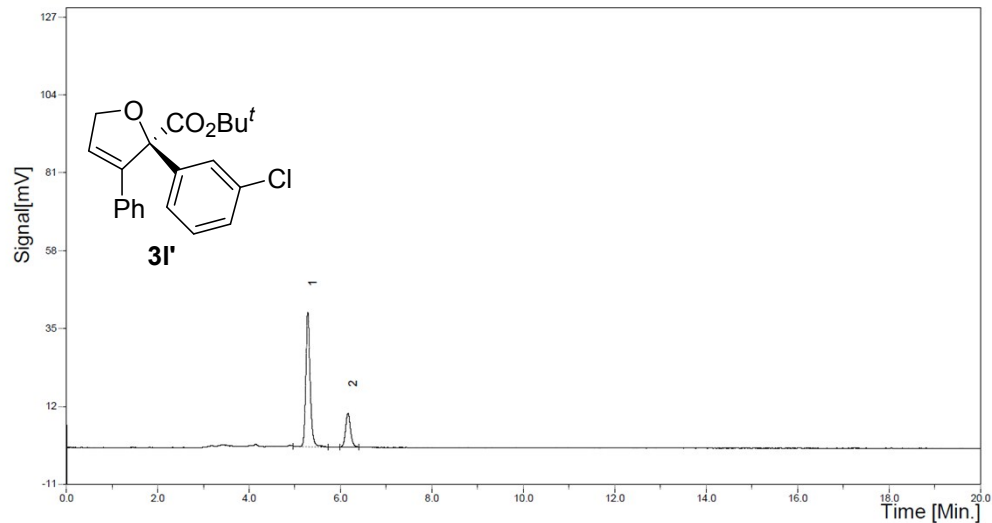

| Peak NO. | Retention time (min) | Peak area (mV.sec) | Percentage of area (%) |
|----------|----------------------|--------------------|------------------------|
| 1        | 5.28333              | 259.71             | 77.8760                |
| 2        | 6.16000              | 73.78              | 22.1240                |
| total    |                      | 333.50             | 100                    |

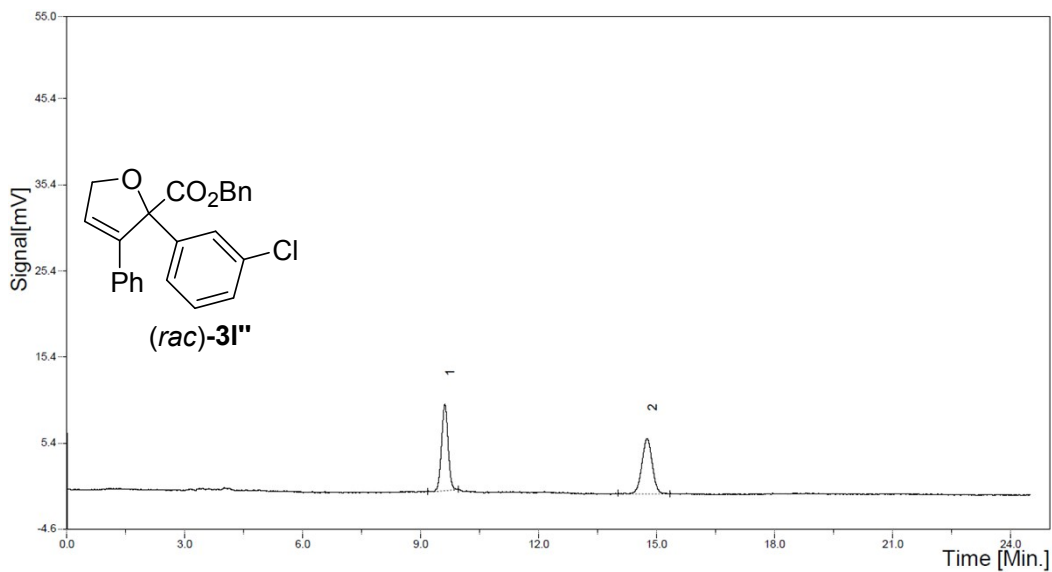

| Peak NO. | Retention time (min) | Peak area (mV.sec) | Percentage of area (%) |
|----------|----------------------|--------------------|------------------------|
| 1        | 9.61667              | 114.19             | 49.7749                |
| 2        | 14.76250             | 115.22             | 50.2251                |
| total    |                      | 229.41             | 100                    |

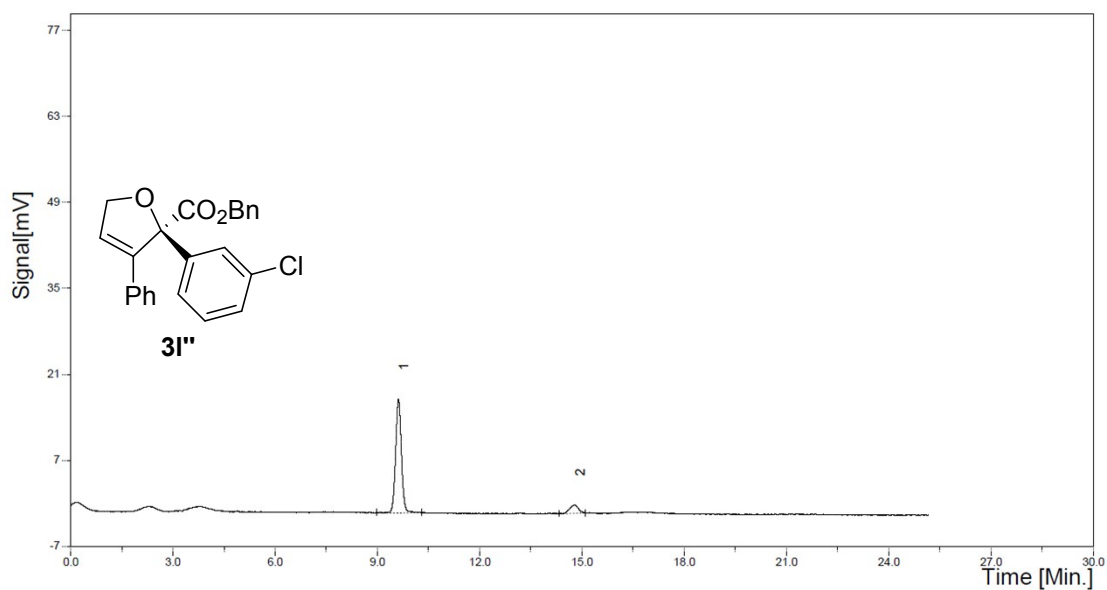

| Peak NO. | Retention time (min) | Peak area (mV.sec) | Percentage of area (%) |
|----------|----------------------|--------------------|------------------------|
| 1        | 9.61083              | 217.10             | 90.8588                |
| 2        | 14.78500             | 21.84              | 9.1412                 |
| total    |                      | 333.50             | 100                    |



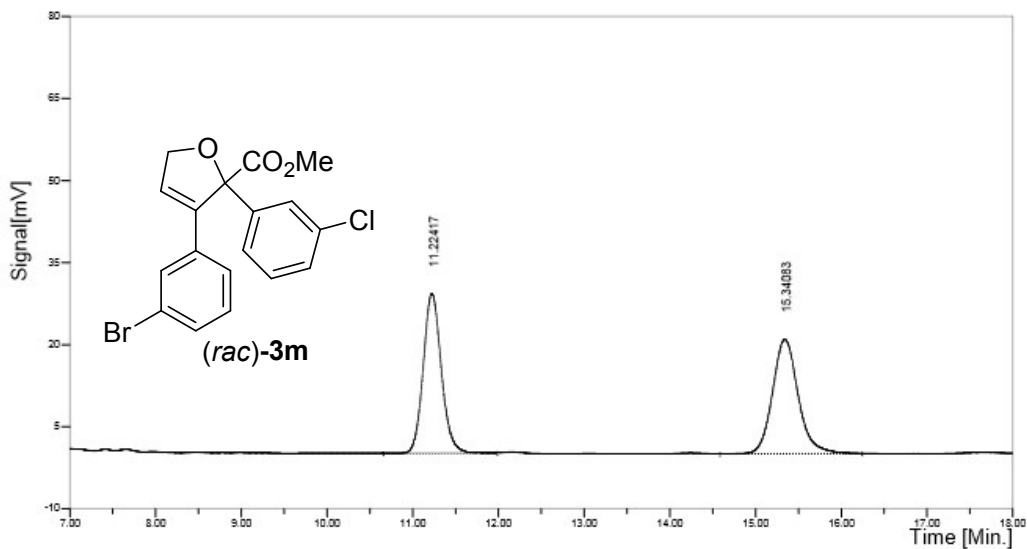

| Peak NO. | Retention time (min) | Peak area (mV.sec) | Percentage of area (%) |
|----------|----------------------|--------------------|------------------------|
| 1        | 8.42417              | 421.13             | 49.4675                |
| 2        | 11.95083             | 430.19             | 50.5325                |
| total    |                      | 851.32             | 100                    |

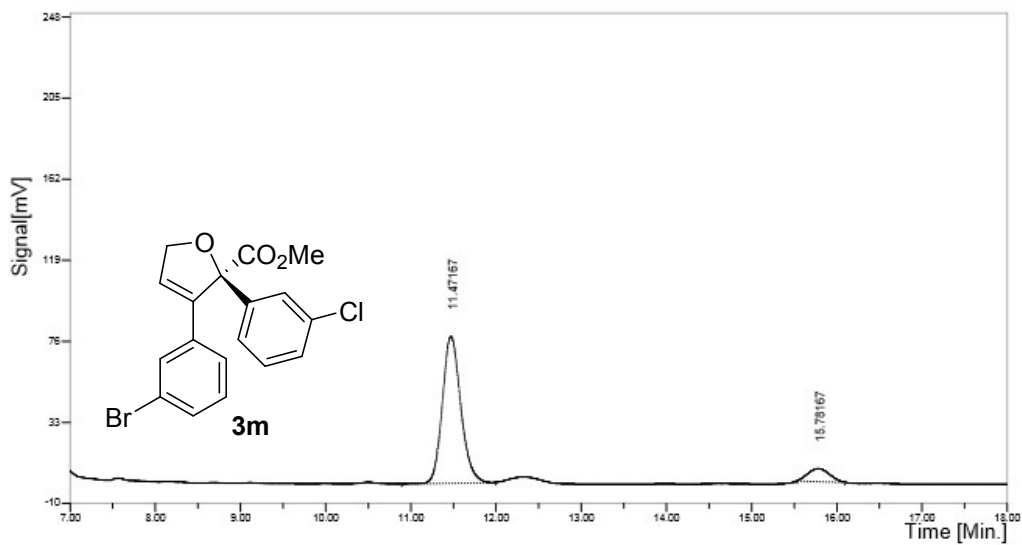

| Peak NO. | Retention time (min) | Peak area (mV.sec) | Percentage of area (%) |
|----------|----------------------|--------------------|------------------------|
| 1        | 11.47167             | 1152.63            | 90.5986                |
| 2        | 15.78167             | 119.61             | 9.4014                 |
| total    |                      | 1272.23            | 100                    |

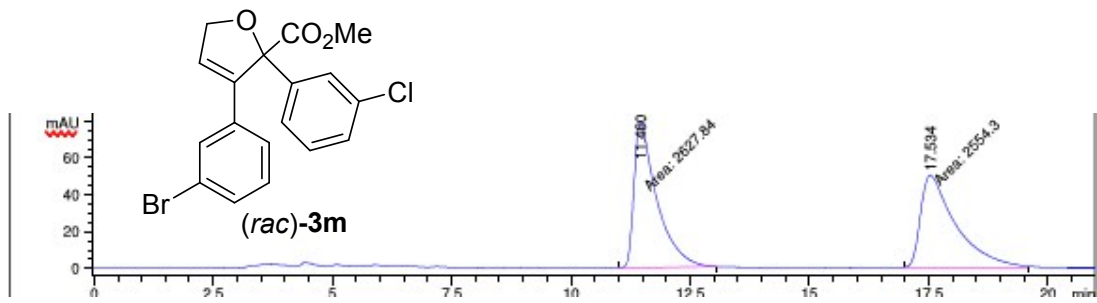

| Peak # | RetTime [min] | Type | Width [min] | Area [mAU*s] | Height [mAU] | Area %  |
|--------|---------------|------|-------------|--------------|--------------|---------|
| 1      | 11.460        | MM   | 0.5517      | 2627.83936   | 79.39070     | 50.7095 |
| 2      | 17.534        | MM   | 0.8522      | 2554.30054   | 49.95264     | 49.2905 |

Totals : 5182.13989 129.34334

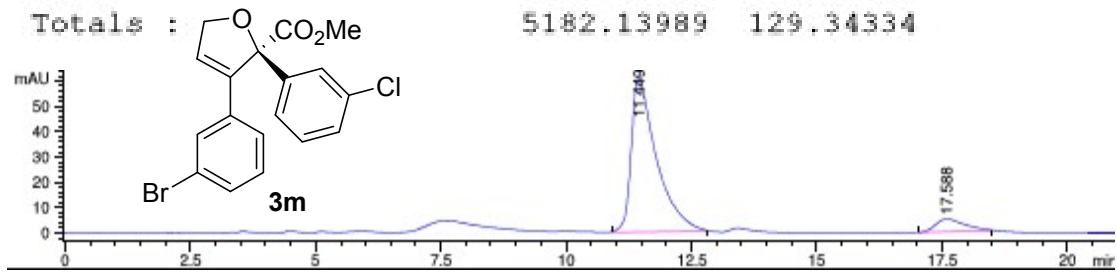

| Peak # | RetTime [min] | Type | Width [min] | Area [mAU*s] | Height [mAU] | Area %  |
|--------|---------------|------|-------------|--------------|--------------|---------|
| 1      | 11.449        | BB   | 0.4976      | 2138.91284   | 61.21994     | 91.2183 |
| 2      | 17.588        | PB   | 0.5105      | 205.91641    | 5.06311      | 8.7817  |

Totals : 2344.82925 66.28305

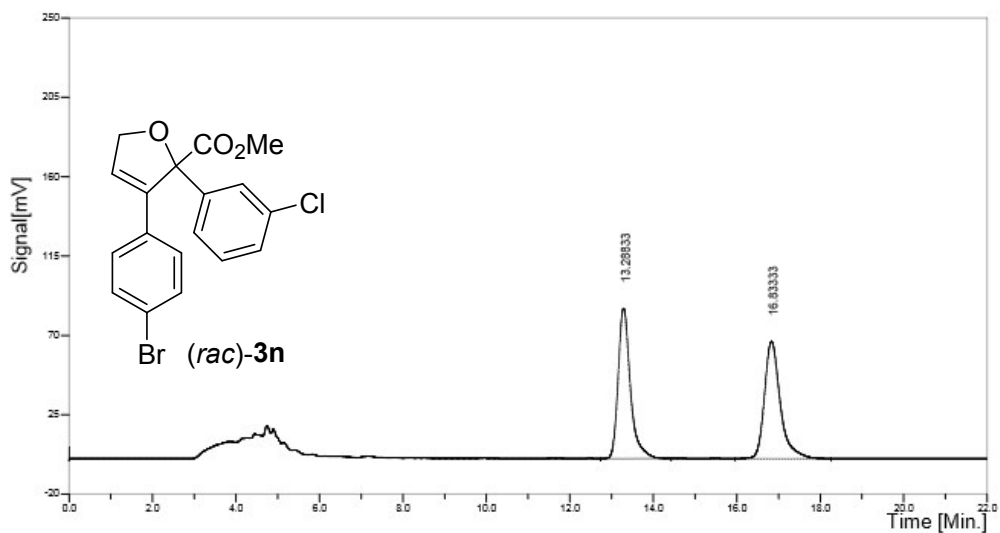

| Peak NO. | Retention time (min) | Peak area (mV.sec) | Percentage of area (%) |
|----------|----------------------|--------------------|------------------------|
| 1        | 13.28833             | 1703.62            | 49.6799                |
| 2        | 16.83333             | 1725.57            | 50.3201                |
| total    |                      | 3429.19            | 100                    |

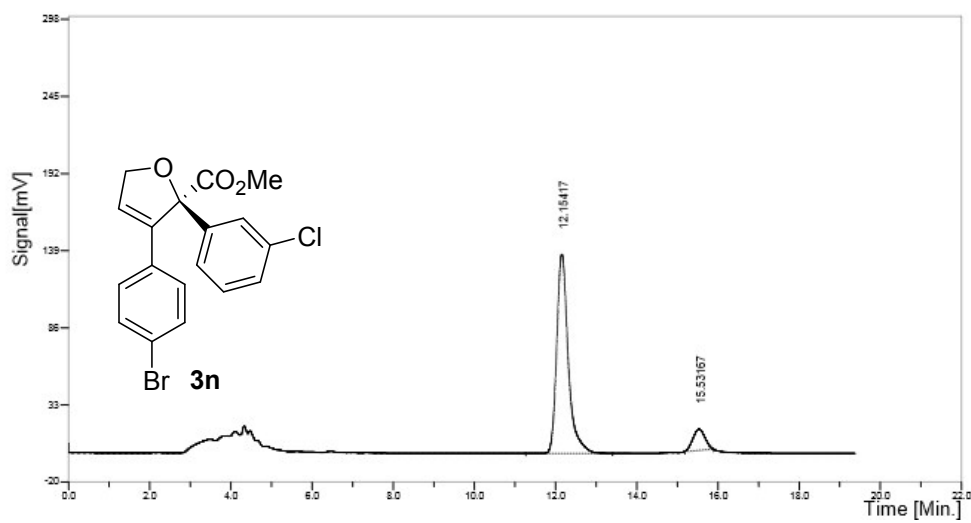

| Peak NO. | Retention time (min) | Peak area (mV.sec) | Percentage of area (%) |
|----------|----------------------|--------------------|------------------------|
| 1        | 12.15417             | 2648.59            | 89.9086                |
| 2        | 15.53167             | 297.28             | 10.0914                |
| total    |                      | 2945.86            | 100                    |

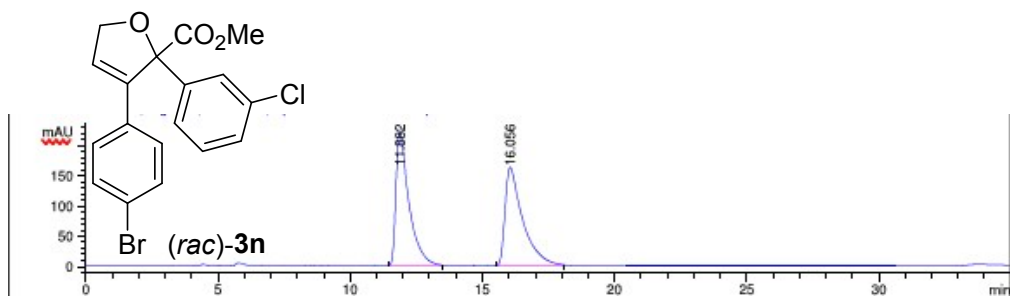

| Peak # | RetTime [min] | Type | Width [min] | Area [mAU*s] | Height [mAU] | Area %  |
|--------|---------------|------|-------------|--------------|--------------|---------|
| 1      | 11.882        | BB   | 0.4862      | 7648.73096   | 224.07246    | 50.3896 |
| 2      | 16.056        | BB   | 0.6552      | 7530.44678   | 162.94998    | 49.6104 |

Totals : 1.51792e4 387.02245

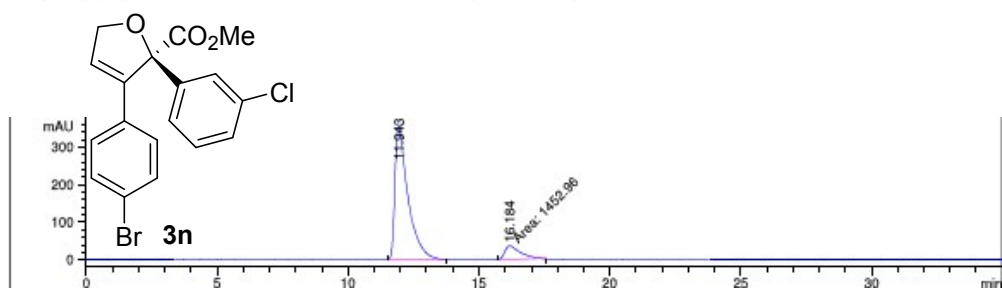

| Peak # | RetTime [min] | Type | Width [min] | Area [mAU*s] | Height [mAU] | Area %  |
|--------|---------------|------|-------------|--------------|--------------|---------|
| 1      | 11.943        | BB   | 0.5004      | 1.23972e4    | 359.45667    | 89.5094 |
| 2      | 16.184        | MM   | 0.6838      | 1452.96375   | 35.41357     | 10.4906 |

Totals : 1.38501e4 394.87024

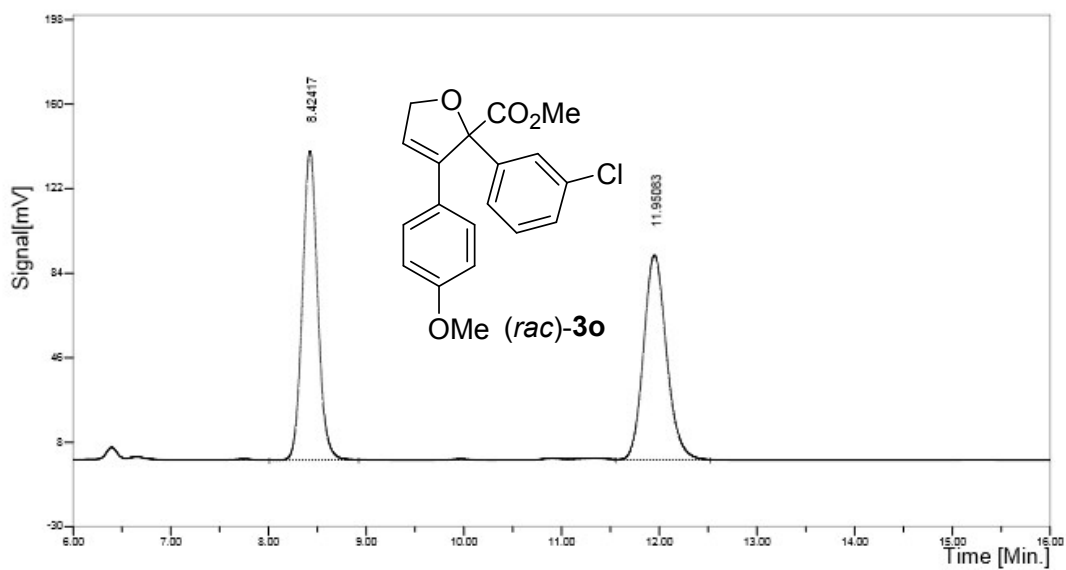

| Peak NO. | Retention time (min) | Peak area (mV.sec) | Percentage of area (%) |
|----------|----------------------|--------------------|------------------------|
| 1        | 8.42417              | 1488.34            | 50.3907                |
| 2        | 11.95083             | 1465.26            | 49.6093                |
| total    |                      | 1953.60            | 100                    |

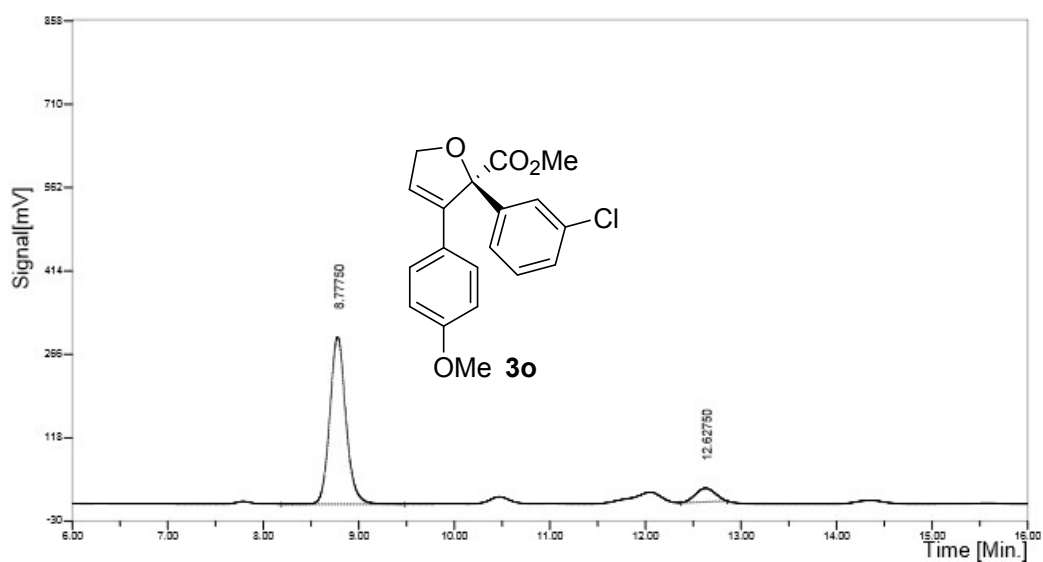

| Peak NO. | Retention time (min) | Peak area (mV.sec) | Percentage of area (%) |
|----------|----------------------|--------------------|------------------------|
| 1        | 8.77750              | 3422.79            | 90.9497                |
| 2        | 12.62750             | 340.60             | 9.0503                 |
| total    |                      | 3763.39            | 100                    |

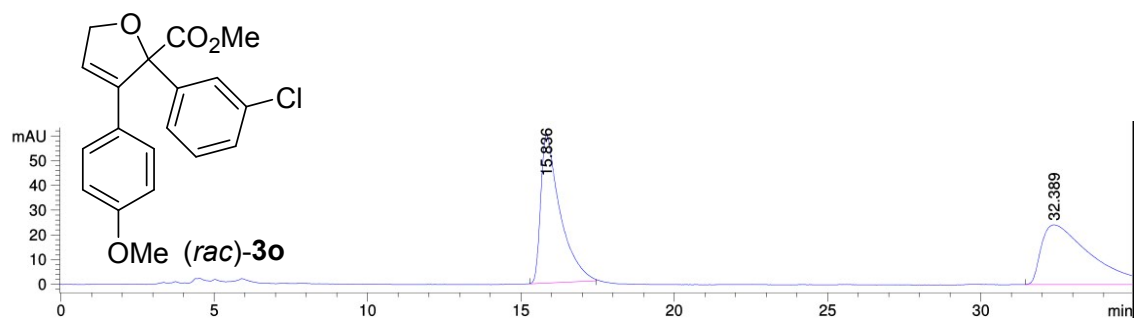

| Peak # | RetTime [min] | Type | Width [min] | Area [mAU*s] | Height [mAU] | Area %  |
|--------|---------------|------|-------------|--------------|--------------|---------|
| 1      | 15.836        | BB   | 0.6254      | 2634.53369   | 59.86848     | 50.2651 |
| 2      | 32.389        | PBA  | 1.2863      | 2606.74072   | 24.09167     | 49.7349 |

Totals : 5241.27441 83.96015

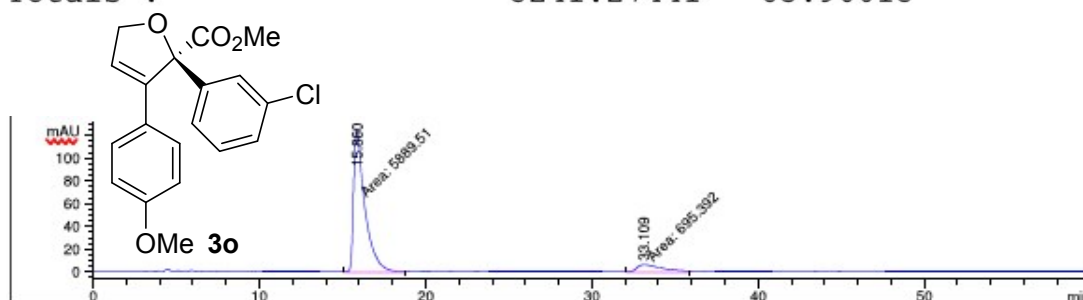

| Peak # | RetTime [min] | Type | Width [min] | Area [mAU*s] | Height [mAU] | Area %  |
|--------|---------------|------|-------------|--------------|--------------|---------|
| 1      | 15.860        | MM   | 0.7846      | 5889.51465   | 125.10153    | 89.4396 |
| 2      | 33.109        | MM   | 1.8168      | 695.39197    | 6.37936      | 10.5604 |

Totals : 6584.90662 131.48090

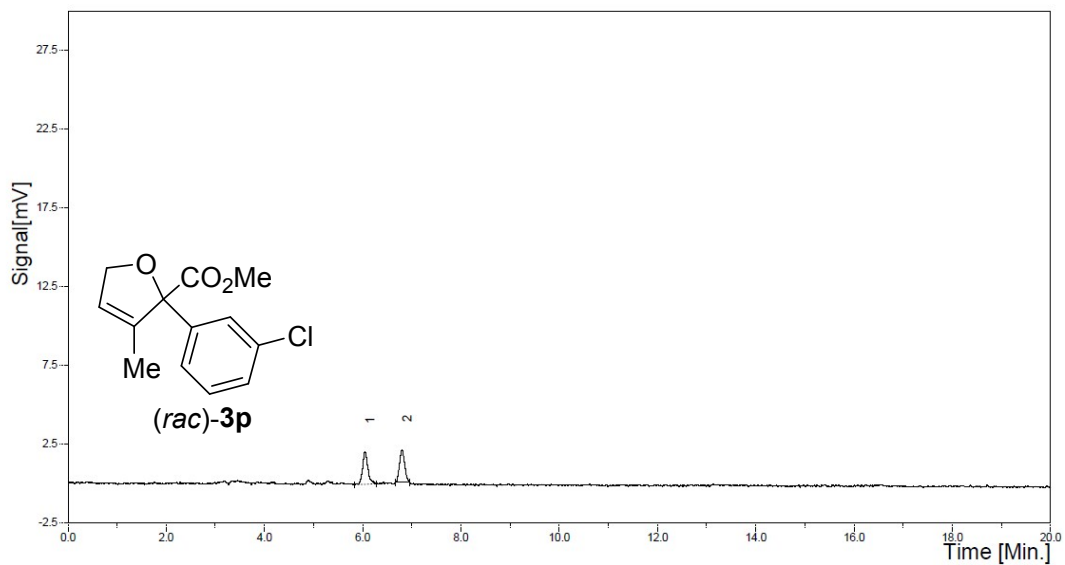

| Peak NO. | Retention time (min) | Peak area (mV.sec) | Percentage of area (%) |
|----------|----------------------|--------------------|------------------------|
| 1        | 6.04667              | 15.38              | 50.6261                |
| 2        | 6.79917              | 15.00              | 49.3739                |
| total    |                      | 3763.39            | 100                    |

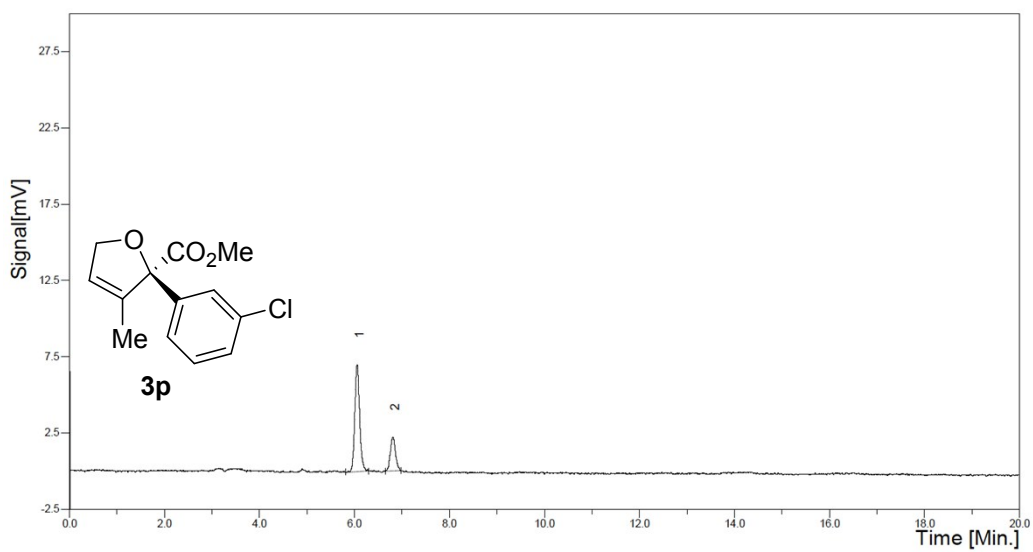

| Peak NO. | Retention time (min) | Peak area (mV.sec) | Percentage of area (%) |
|----------|----------------------|--------------------|------------------------|
| 1        | 6.05417              | 49.81              | 74.6891                |
| 2        | 6.80583              | 16.88              | 25.3109                |
| total    |                      | 3763.39            | 100                    |

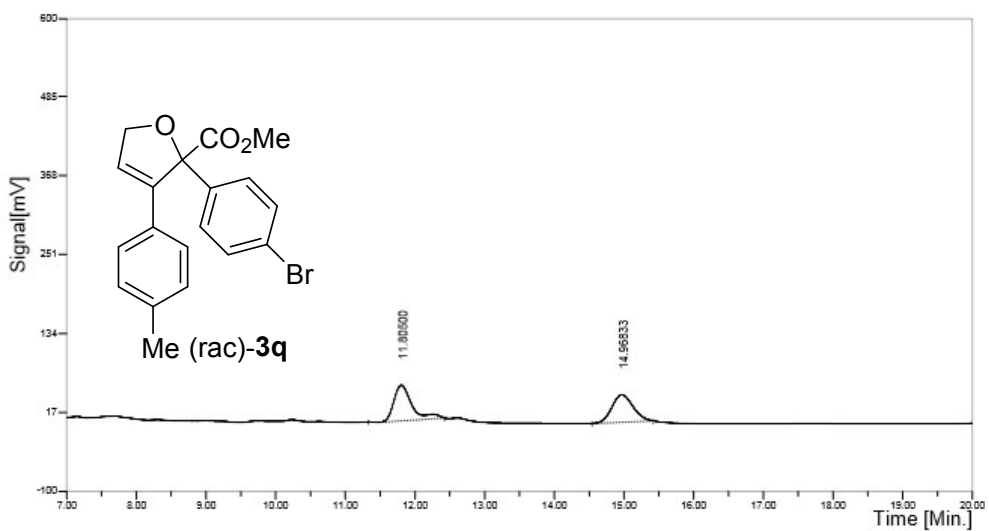

| Peak NO. | Retention time (min) | Peak area (mV.sec) | Percentage of area (%) |
|----------|----------------------|--------------------|------------------------|
| 1        | 11.80500             | 896.50             | 51.2879                |
| 2        | 14.96833             | 851.48             | 48.7121                |
| total    |                      | 1747.98            | 100                    |

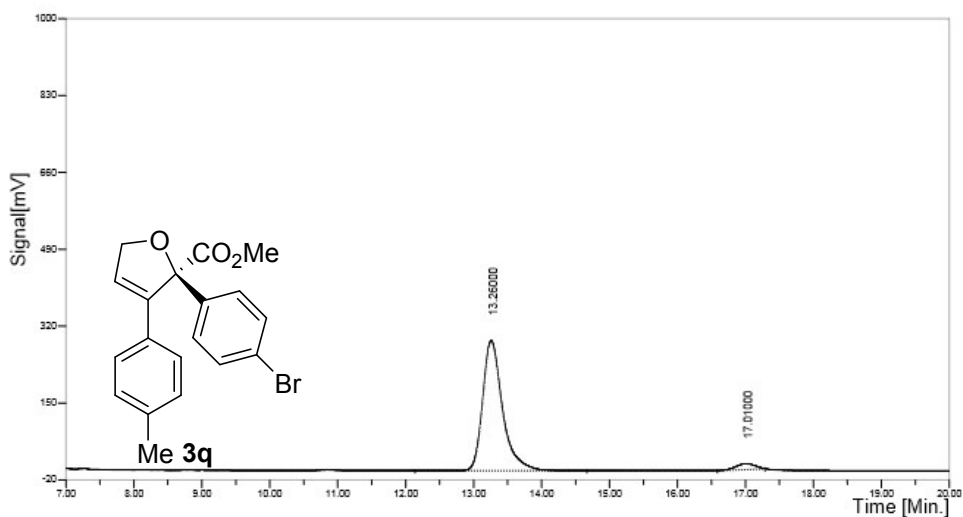

| Peak NO. | Retention time (min) | Peak area (mV.sec) | Percentage of area (%) |
|----------|----------------------|--------------------|------------------------|
| 1        | 13.26000             | 5781.87            | 95.9735                |
| 2        | 17.01000             | 242.57             | 4.0265                 |
| total    |                      | 6024.45            | 100                    |



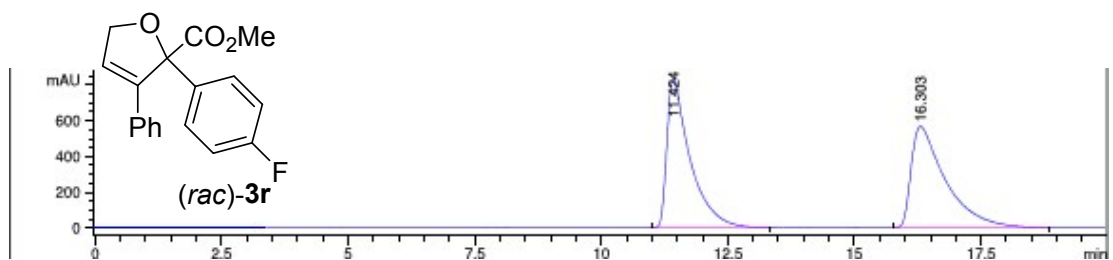

| Peak # | RetTime [min] | Type | Width [min] | Area [mAU*s] | Height [mAU] | Area %  |
|--------|---------------|------|-------------|--------------|--------------|---------|
| 1      | 11.424        | BB   | 0.4514      | 2.65999e4    | 835.46490    | 49.7973 |
| 2      | 16.303        | BB   | 0.6751      | 2.68164e4    | 567.72009    | 50.2027 |

Totals : 5.34164e4 1403.18500

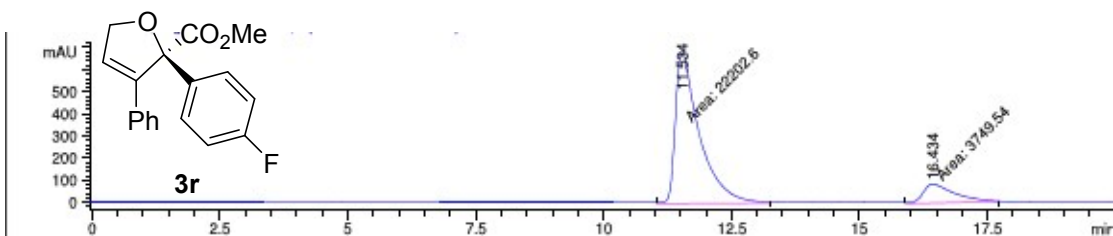

| Peak # | RetTime [min] | Type | Width [min] | Area [mAU*s] | Height [mAU] | Area %  |
|--------|---------------|------|-------------|--------------|--------------|---------|
| 1      | 11.534        | MM   | 0.5358      | 2.22026e4    | 690.65497    | 85.5521 |
| 2      | 16.434        | MM   | 0.7261      | 3749.54297   | 86.06681     | 14.4479 |

Totals : 2.59522e4 776.72178

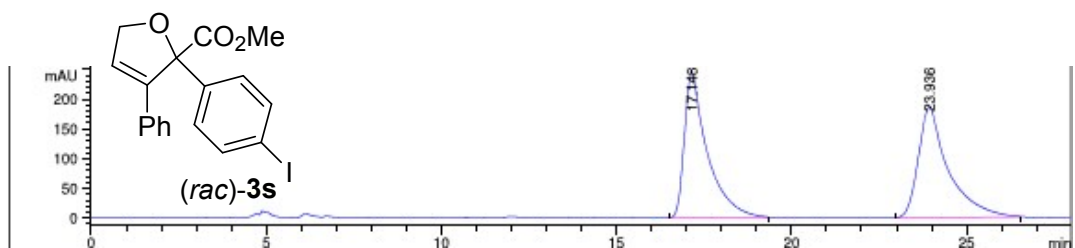

| Peak # | RetTime [min] | Type | Width [min] | Area [mAU*s] | Height [mAU] | Area %  |
|--------|---------------|------|-------------|--------------|--------------|---------|
| 1      | 17.148        | BB   | 0.6386      | 1.10927e4    | 241.18089    | 50.2338 |
| 2      | 23.936        | BB   | 0.8247      | 1.09894e4    | 185.61333    | 49.7662 |

Totals : 2.20821e4 426.79422

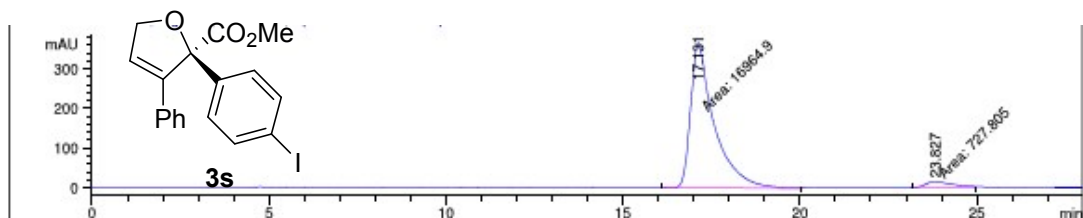

| Peak # | RetTime [min] | Type | Width [min] | Area [mAU*s] | Height [mAU] | Area %  |
|--------|---------------|------|-------------|--------------|--------------|---------|
| 1      | 17.131        | MM   | 0.7718      | 1.69649e4    | 366.34326    | 95.8864 |
| 2      | 23.827        | MM   | 0.8487      | 727.80493    | 14.29185     | 4.1136  |

Totals : 1.76927e4 380.63511

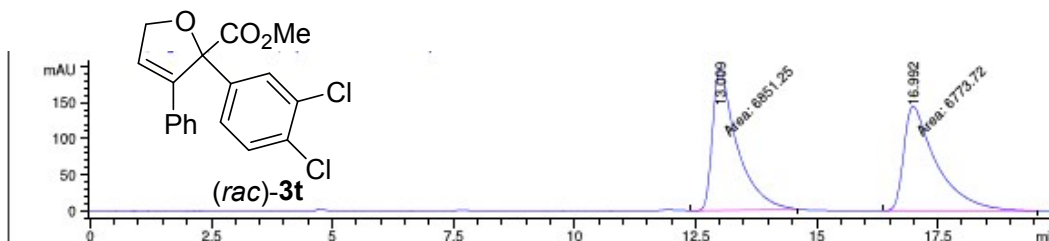

| Peak # | RetTime [min] | Type | Width [min] | Area [mAU*s] | Height [mAU] | Area %  |
|--------|---------------|------|-------------|--------------|--------------|---------|
| 1      | 13.009        | MM   | 0.5845      | 6851.24658   | 195.34415    | 50.2845 |
| 2      | 16.992        | MM   | 0.7840      | 6773.72461   | 143.99345    | 49.7155 |

Totals : 1.36250e4 339.33760

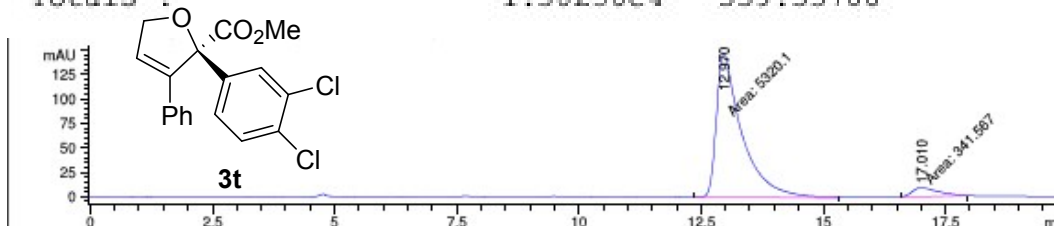

| Peak # | RetTime [min] | Type | Width [min] | Area [mAU*s] | Height [mAU] | Area %  |
|--------|---------------|------|-------------|--------------|--------------|---------|
| 1      | 12.970        | MM   | 0.6048      | 5320.10352   | 146.59758    | 93.9670 |
| 2      | 17.010        | MM   | 0.6183      | 341.56696    | 9.20763      | 6.0330  |

Totals : 5661.67047 155.80521

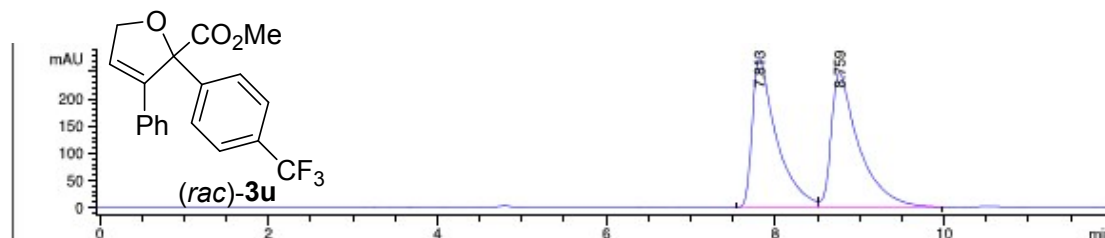

| Peak # | RetTime [min] | Type | Width [min] | Area [mAU*s] | Height [mAU] | Area %  |
|--------|---------------|------|-------------|--------------|--------------|---------|
| 1      | 7.813         | PV   | 0.2774      | 5468.34863   | 275.71201    | 49.1826 |
| 2      | 8.759         | VB   | 0.3228      | 5650.10547   | 247.04898    | 50.8174 |

Totals : 1.11185e4 522.76099

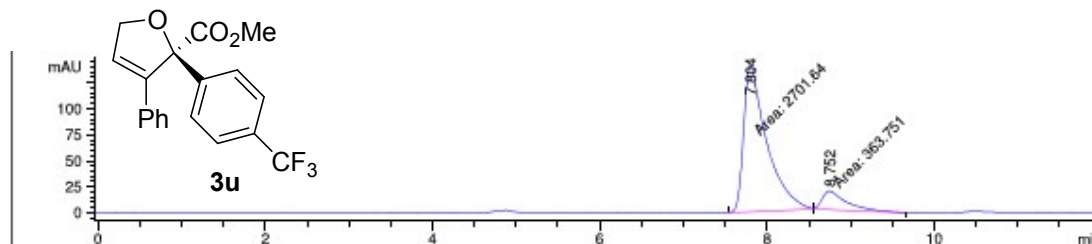

| Peak # | RetTime [min] | Type | Width [min] | Area [mAU*s] | Height [mAU] | Area %  |
|--------|---------------|------|-------------|--------------|--------------|---------|
| 1      | 7.804         | MM   | 0.3186      | 2701.63989   | 141.31232    | 88.1336 |
| 2      | 8.752         | MM   | 0.3420      | 363.75064    | 17.72688     | 11.8664 |

Totals : 3065.39053 159.03920

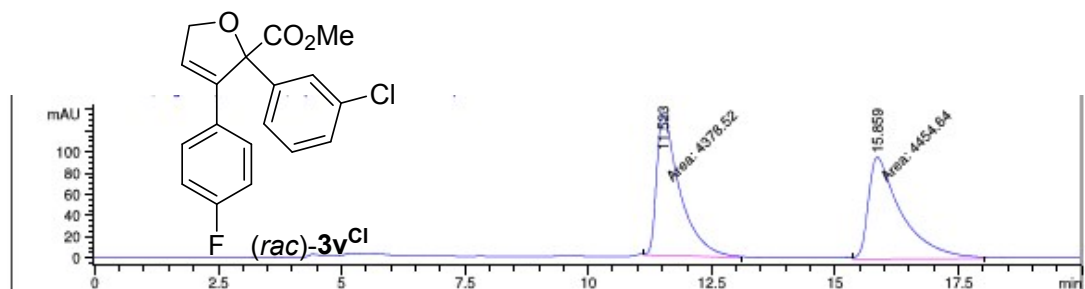

| Peak # | RetTime [min] | Type | Width [min] | Area [mAU*s] | Height [mAU] | Area %  |
|--------|---------------|------|-------------|--------------|--------------|---------|
| 1      | 11.523        | MM   | 0.5407      | 4378.52246   | 134.96783    | 49.5692 |
| 2      | 15.859        | MM   | 0.7744      | 4454.63770   | 95.87447     | 50.4308 |

Totals : 8833.16016 230.84230

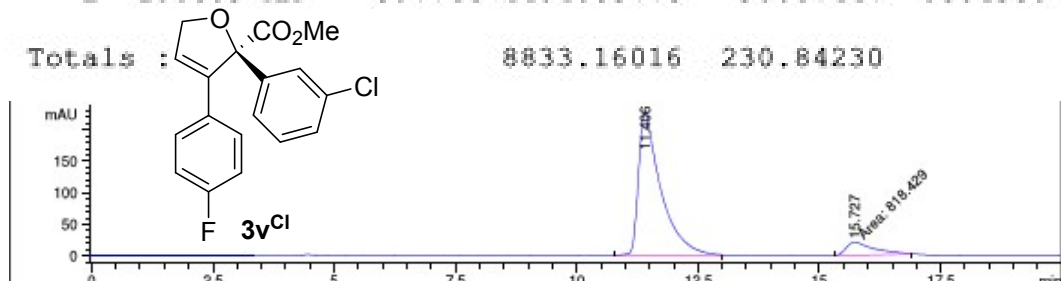

| Peak # | RetTime [min] | Type | Width [min] | Area [mAU*s] | Height [mAU] | Area %  |
|--------|---------------|------|-------------|--------------|--------------|---------|
| 1      | 11.406        | BB   | 0.4579      | 7280.71143   | 225.96733    | 89.8949 |
| 2      | 15.727        | MM   | 0.6699      | 818.42944    | 20.36209     | 10.1051 |

Totals : 8099.14087 246.32942

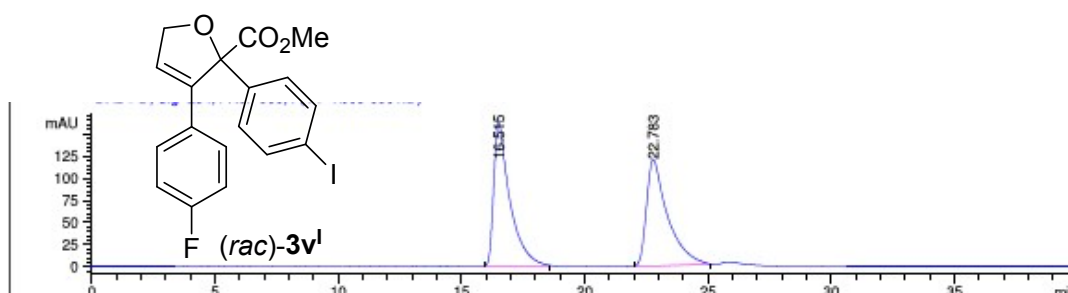

| Peak #   | RetTime [min] | Type | Width [min] | Area [mAU*s] | Height [mAU] | Area %  |
|----------|---------------|------|-------------|--------------|--------------|---------|
| 1        | 16.515        | BB   | 0.6420      | 7355.46582   | 163.14612    | 50.7547 |
| 2        | 22.783        | BB   | 0.8382      | 7136.71777   | 119.93546    | 49.2453 |
| Totals : |               |      |             | 1.44922e4    | 283.08157    |         |

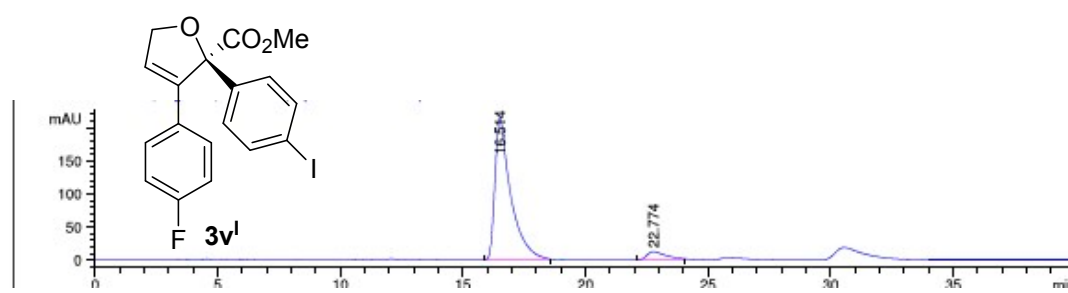

| Peak #   | RetTime [min] | Type | Width [min] | Area [mAU*s] | Height [mAU] | Area %  |
|----------|---------------|------|-------------|--------------|--------------|---------|
| 1        | 16.514        | BB   | 0.6313      | 9627.69629   | 215.44711    | 93.8316 |
| 2        | 22.774        | BB   | 0.6124      | 632.91589    | 12.33924     | 6.1684  |
| Totals : |               |      |             | 1.02606e4    | 227.78636    |         |

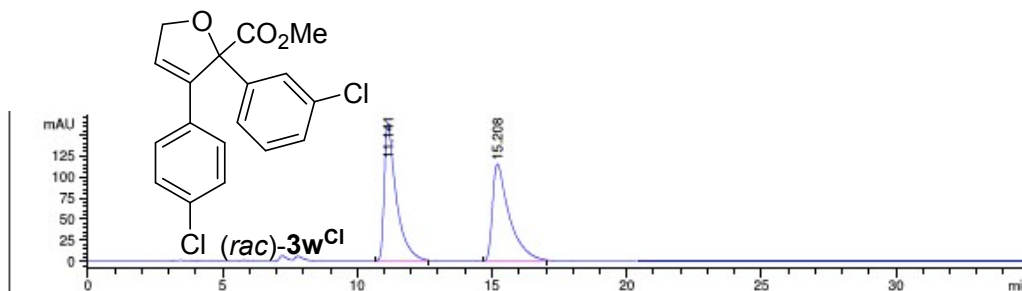

| Peak # | RetTime [min] | Type | Width [min] | Area [mAU*s] | Height [mAU] | Area %  |
|--------|---------------|------|-------------|--------------|--------------|---------|
| 1      | 11.141        | BB   | 0.4401      | 5086.66504   | 163.87410    | 50.7097 |
| 2      | 15.208        | BB   | 0.6103      | 4944.28320   | 114.37978    | 49.2903 |

Totals : COC(=O)C1=CC=C(C=C1)C2=CC=C(C=C2)Cl 1.00309e4 278.25388

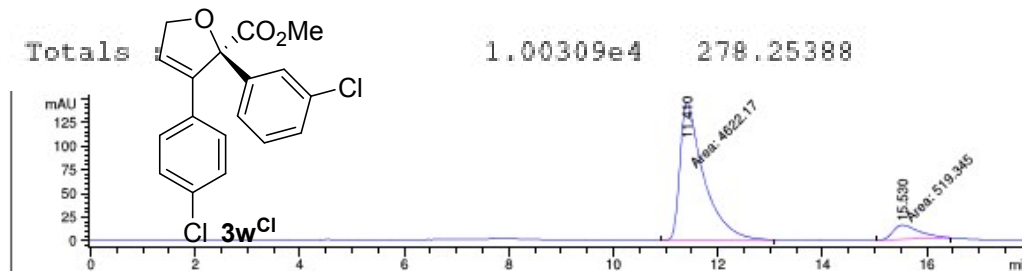

| Peak # | RetTime [min] | Type | Width [min] | Area [mAU*s] | Height [mAU] | Area %  |
|--------|---------------|------|-------------|--------------|--------------|---------|
| 1      | 11.410        | MM   | 0.5289      | 4622.16992   | 145.65225    | 89.8990 |
| 2      | 15.530        | MM   | 0.5746      | 519.34460    | 15.06500     | 10.1010 |

Totals : 5141.51453 160.71725

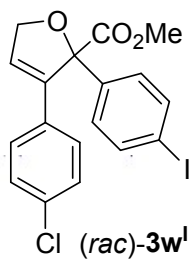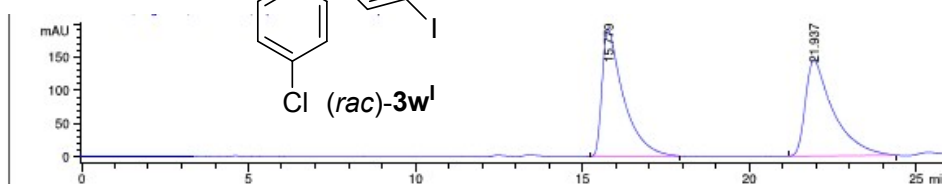

| Peak #   | RetTime [min] | Type | Width [min] | Area [mAU*s] | Height [mAU] | Area %  |
|----------|---------------|------|-------------|--------------|--------------|---------|
| 1        | 15.779        | BB   | 0.6459      | 8556.36523   | 190.53479    | 50.5355 |
| 2        | 21.937        | BB   | 0.8207      | 8375.02734   | 143.53569    | 49.4645 |
| Totals : |               |      |             | 1.69314e4    | 334.07048    |         |

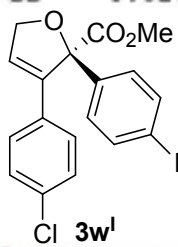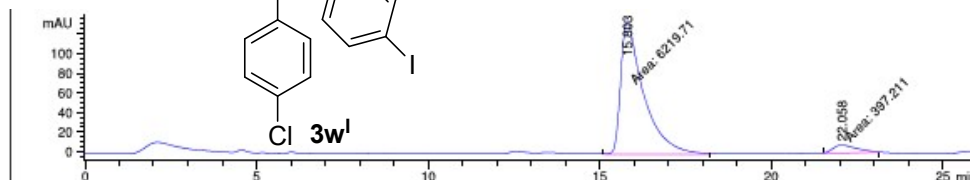

| Peak #   | RetTime [min] | Type | Width [min] | Area [mAU*s] | Height [mAU] | Area %  |
|----------|---------------|------|-------------|--------------|--------------|---------|
| 1        | 15.803        | MM   | 0.7699      | 6219.70752   | 134.63850    | 93.9970 |
| 2        | 22.058        | MM   | 0.7992      | 397.21100    | 8.28314      | 6.0030  |
| Totals : |               |      |             | 6616.91852   | 142.92164    |         |



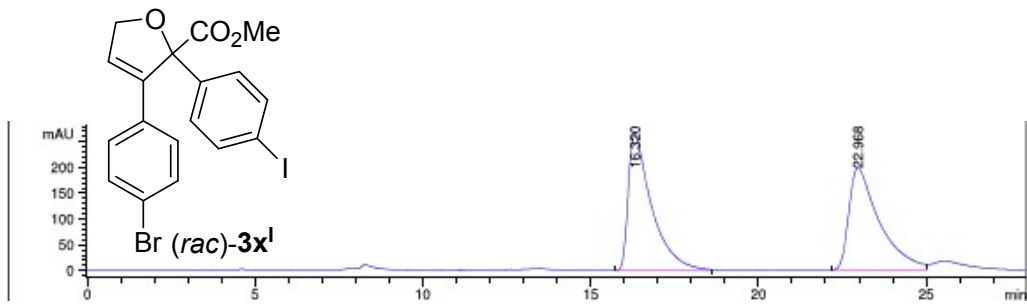

| Peak # | RetTime [min] | Type | Width [min] | Area [mAU*s] | Height [mAU] | Area %  |
|--------|---------------|------|-------------|--------------|--------------|---------|
| 1      | 16.320        | BB   | 0.6827      | 1.28081e4    | 267.45074    | 50.5410 |
| 2      | 22.968        | BB   | 0.9008      | 1.25339e4    | 198.47818    | 49.4590 |

Totals : COC(=O)C1=C(C=C1)C2=CC=C(C=C2)Br 2.53421e4 465.92892

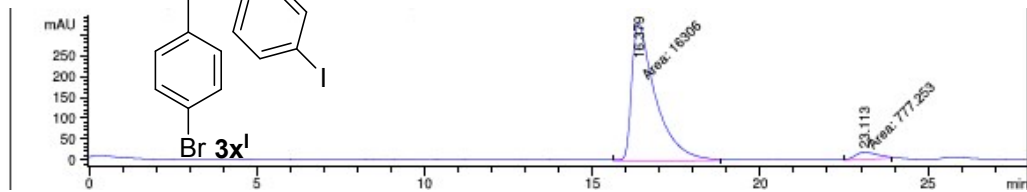

| Peak # | RetTime [min] | Type | Width [min] | Area [mAU*s] | Height [mAU] | Area %  |
|--------|---------------|------|-------------|--------------|--------------|---------|
| 1      | 16.379        | MM   | 0.8215      | 1.63060e4    | 330.81659    | 95.4502 |
| 2      | 23.113        | MM   | 0.7655      | 777.25287    | 16.92294     | 4.5498  |

Totals : 1.70832e4 347.73953

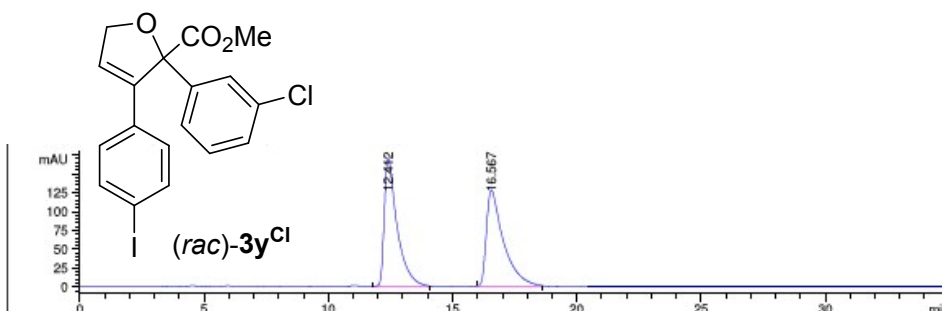

| Peak #   | RetTime [min] | Type | Width [min] | Area [mAU*s] | Height [mAU] | Area %  |
|----------|---------------|------|-------------|--------------|--------------|---------|
| 1        | 12.412        | BB   | 0.5139      | 6097.26221   | 170.22220    | 50.1268 |
| 2        | 16.567        | BB   | 0.6767      | 6066.41455   | 127.58616    | 49.8732 |
| Totals : |               |      |             | 1.21637e4    | 297.80836    |         |

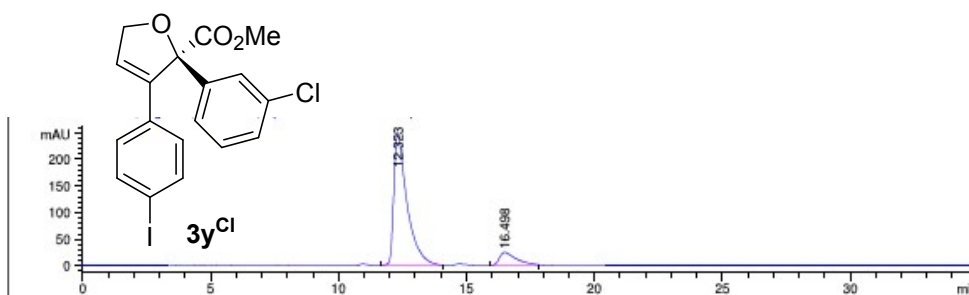

| Peak #   | RetTime [min] | Type | Width [min] | Area [mAU*s] | Height [mAU] | Area %  |
|----------|---------------|------|-------------|--------------|--------------|---------|
| 1        | 12.323        | BB   | 0.5112      | 8919.56934   | 248.26727    | 89.0456 |
| 2        | 16.498        | PB   | 0.6321      | 1097.29016   | 24.05755     | 10.9544 |
| Totals : |               |      |             | 1.00169e4    | 272.32482    |         |

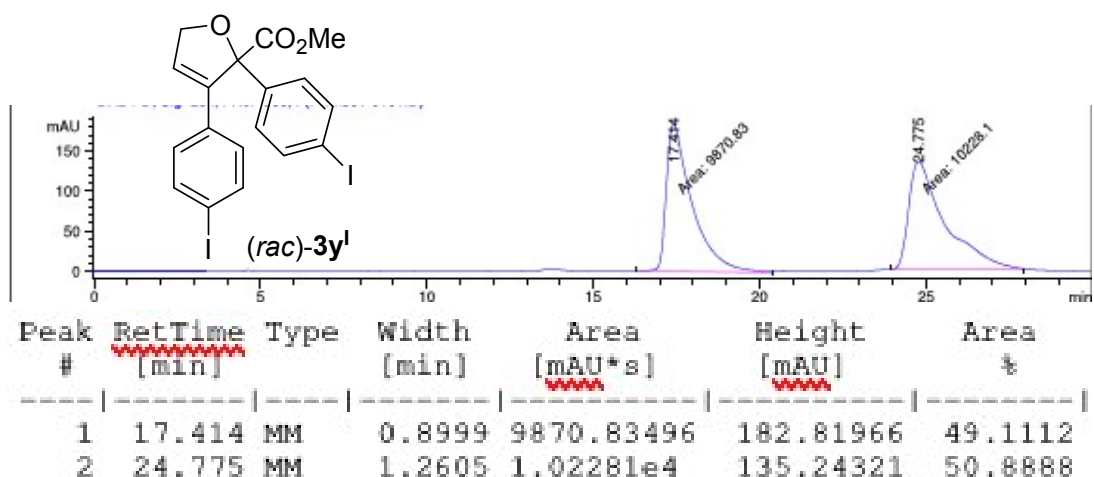

Totals : 2.00990e4 318.06287

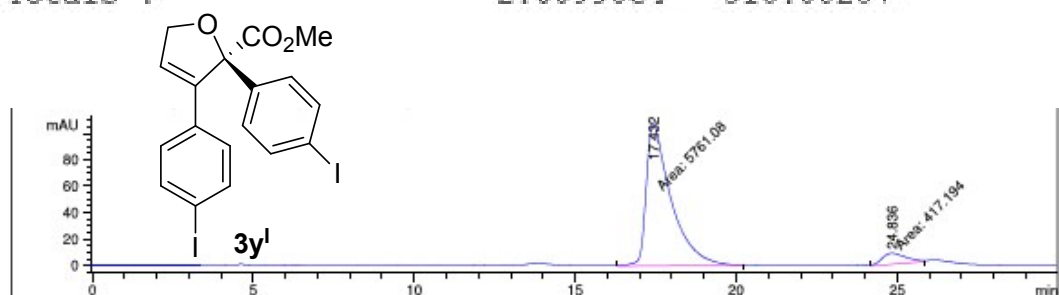

Totals : 6178.26932 115.93857

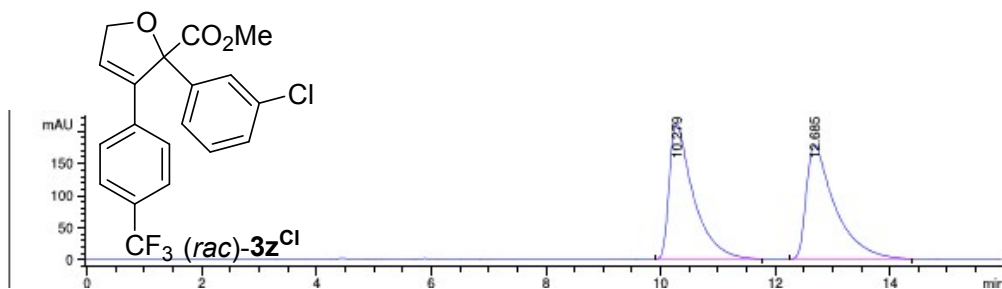

| Peak # | RetTime [min] | Type | Width [min] | Area [mAU*s] | Height [mAU] | Area %  |
|--------|---------------|------|-------------|--------------|--------------|---------|
| 1      | 10.279        | BB   | 0.4180      | 6217.50586   | 212.08061    | 50.0433 |
| 2      | 12.685        | BB   | 0.5002      | 6206.75781   | 178.28883    | 49.9567 |

Totals : 1.24243e4 390.36945

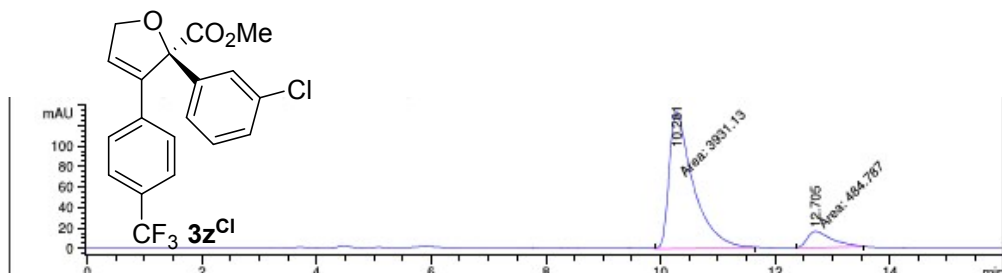

| Peak # | RetTime [min] | Type | Width [min] | Area [mAU*s] | Height [mAU] | Area %  |
|--------|---------------|------|-------------|--------------|--------------|---------|
| 1      | 10.281        | MM   | 0.4898      | 3931.13330   | 133.77592    | 89.0218 |
| 2      | 12.705        | MM   | 0.5044      | 484.78699    | 16.01945     | 10.9782 |

Totals : 4415.92029 149.79537

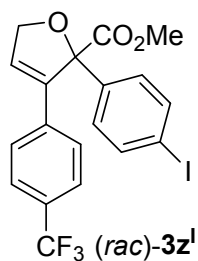

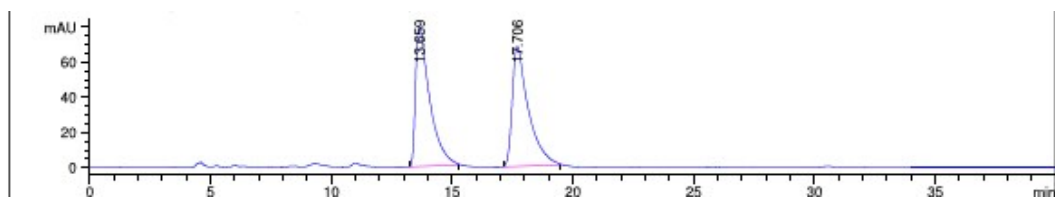

| Peak # | RetTime [min] | Type | Width [min] | Area [mAU*s] | Height [mAU] | Area %  |
|--------|---------------|------|-------------|--------------|--------------|---------|
| 1      | 13.659        | BB   | 0.5765      | 3235.79297   | 79.56165     | 50.5974 |
| 2      | 17.706        | BB   | 0.6436      | 3159.38696   | 68.06228     | 49.4026 |

Totals : 6395.17993 147.62393

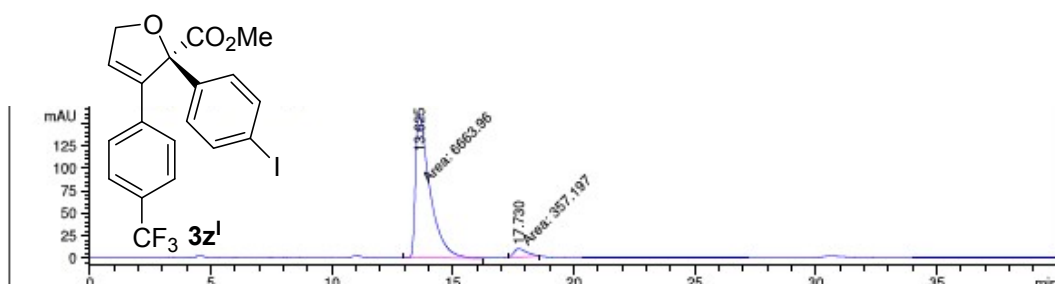

| Peak # | RetTime [min] | Type | Width [min] | Area [mAU*s] | Height [mAU] | Area %  |
|--------|---------------|------|-------------|--------------|--------------|---------|
| 1      | 13.625        | MM   | 0.6955      | 6663.96289   | 159.68738    | 94.9126 |
| 2      | 17.730        | MM   | 0.6304      | 357.19739    | 9.44297      | 5.0874  |

Totals : 7021.16028 169.13035

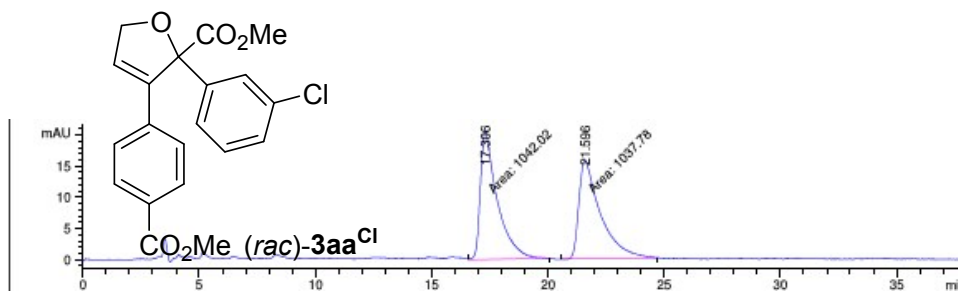

| Peak #   | RetTime [min] | Type | Width [min] | Area [mAU*s] | Height [mAU] | Area %  |
|----------|---------------|------|-------------|--------------|--------------|---------|
| 1        | 17.306        | MM   | 0.8455      | 1042.02454   | 20.53952     | 50.1020 |
| 2        | 21.596        | MM   | 1.0974      | 1037.77991   | 15.76123     | 49.8980 |
| Totals : |               |      |             | 2079.80444   | 36.30075     |         |

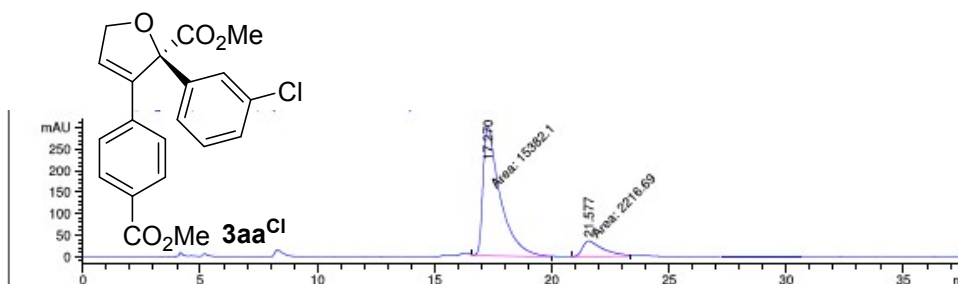

| Peak #   | RetTime [min] | Type | Width [min] | Area [mAU*s] | Height [mAU] | Area %  |
|----------|---------------|------|-------------|--------------|--------------|---------|
| 1        | 17.270        | MM   | 0.8521      | 1.53821e4    | 300.86414    | 87.4043 |
| 2        | 21.577        | MM   | 1.0152      | 2216.68750   | 36.39233     | 12.5957 |
| Totals : |               |      |             | 1.75988e4    | 337.25647    |         |



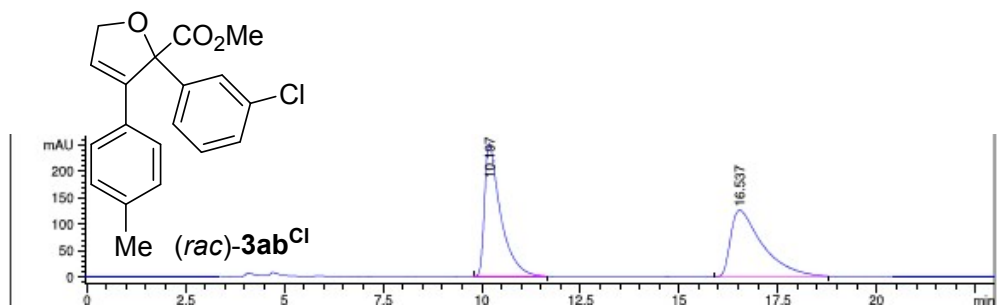

| Peak # | RetTime [min] | Type | Width [min] | Area [mAU*s] | Height [mAU] | Area %  |
|--------|---------------|------|-------------|--------------|--------------|---------|
| 1      | 10.197        | BB   | 0.4138      | 7152.69775   | 251.47589    | 50.2581 |
| 2      | 16.537        | BB   | 0.8074      | 7079.24658   | 125.64143    | 49.7419 |

Totals : 1.42319e4 377.11732

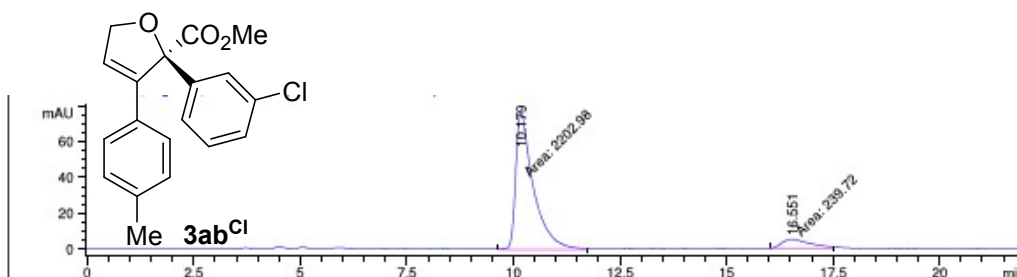

| Peak # | RetTime [min] | Type | Width [min] | Area [mAU*s] | Height [mAU] | Area %  |
|--------|---------------|------|-------------|--------------|--------------|---------|
| 1      | 10.179        | MM   | 0.4795      | 2202.97656   | 76.57000     | 90.1863 |
| 2      | 16.551        | MM   | 0.7843      | 239.71956    | 5.09402      | 9.8137  |

Totals : 2442.69612 81.66402



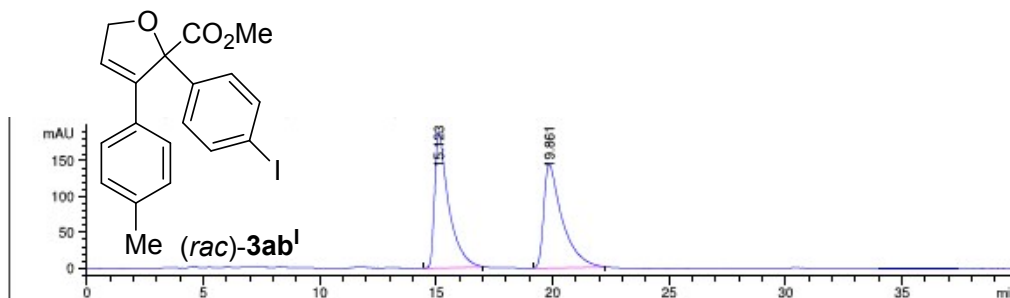

| Peak # | RetTime [min] | Type | Width [min] | Area [mAU*s] | Height [mAU] | Area %  |
|--------|---------------|------|-------------|--------------|--------------|---------|
| 1      | 15.123        | PB   | 0.5824      | 7953.88330   | 189.97961    | 49.8687 |
| 2      | 19.861        | BB   | 0.7800      | 7995.76807   | 144.84357    | 50.1313 |

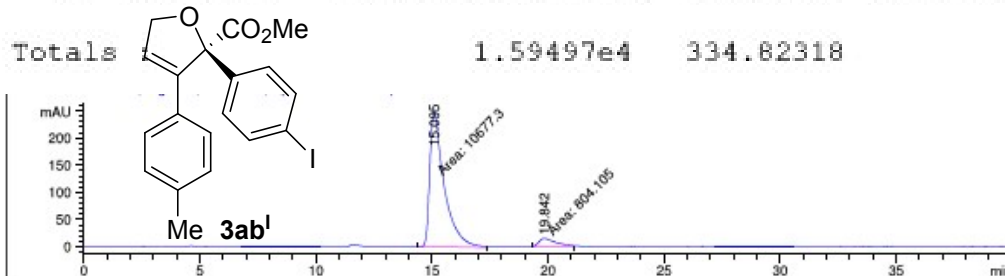

| Peak # | RetTime [min] | Type | Width [min] | Area [mAU*s] | Height [mAU] | Area %  |
|--------|---------------|------|-------------|--------------|--------------|---------|
| 1      | 15.095        | MM   | 0.7106      | 1.06773e4    | 250.44604    | 92.9965 |
| 2      | 19.842        | MM   | 0.8710      | 804.10510    | 15.38731     | 7.0035  |

Totals : 1.14814e4 265.83336

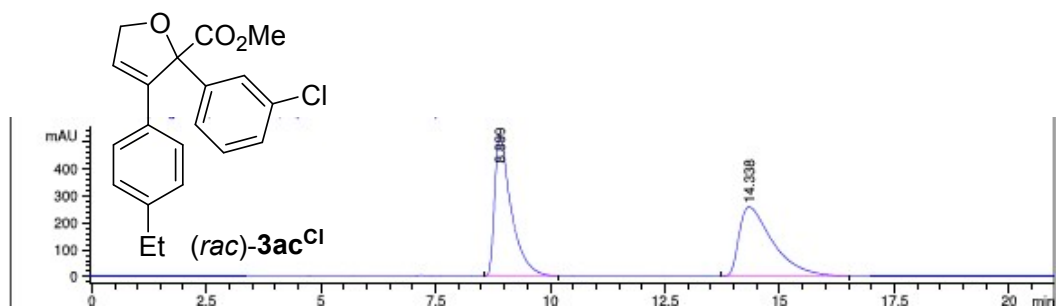

| Peak # | RetTime [min] | Type | Width [min] | Area [mAU*s] | Height [mAU] | Area %  |
|--------|---------------|------|-------------|--------------|--------------|---------|
| 1      | 8.899         | VB   | 0.3628      | 1.32531e4    | 528.05212    | 49.9456 |
| 2      | 14.338        | PB   | 0.7546      | 1.32819e4    | 258.01193    | 50.0544 |

Totals : 2.65350e4 786.06406

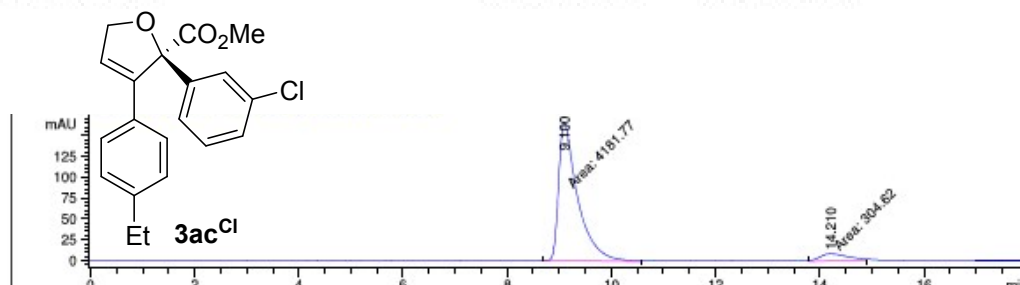

| Peak # | RetTime [min] | Type | Width [min] | Area [mAU*s] | Height [mAU] | Area %  |
|--------|---------------|------|-------------|--------------|--------------|---------|
| 1      | 9.100         | MM   | 0.4208      | 4181.77393   | 165.64491    | 93.2101 |
| 2      | 14.210        | MM   | 0.6025      | 304.61981    | 8.42634      | 6.7899  |

Totals : 4486.39374 174.07125

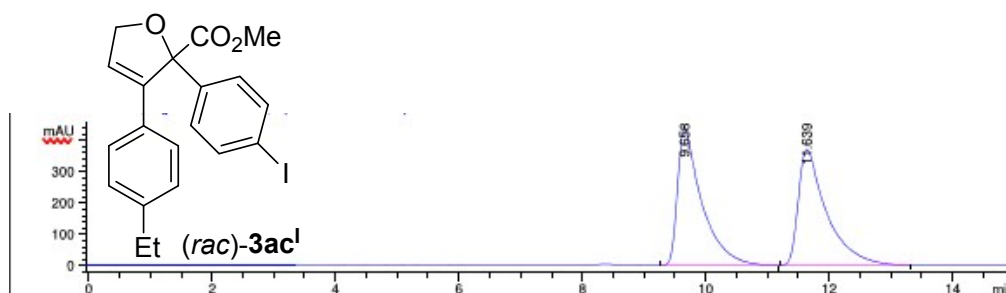

| Peak #   | RetTime [min] | Type | Width [min] | Area [mAU*s] | Height [mAU] | Area %  |
|----------|---------------|------|-------------|--------------|--------------|---------|
| 1        | 9.658         | BP   | 0.3877      | 1.19543e4    | 433.48761    | 50.3688 |
| 2        | 11.639        | BB   | 0.4502      | 1.17793e4    | 369.23737    | 49.6312 |
| Totals : |               |      |             | 2.37336e4    | 802.72498    |         |

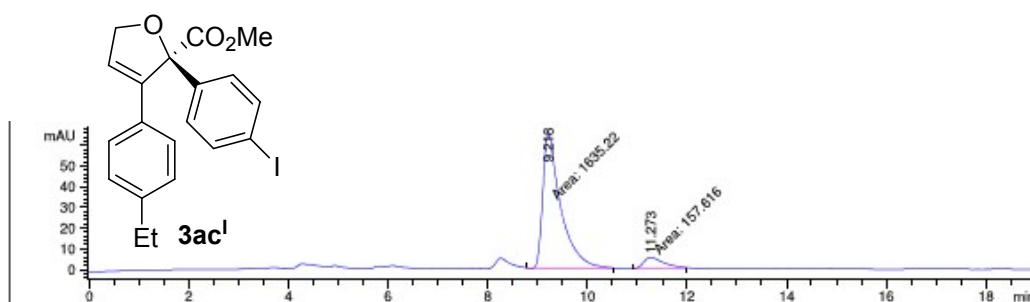

| Peak #   | RetTime [min] | Type | Width [min] | Area [mAU*s] | Height [mAU] | Area %  |
|----------|---------------|------|-------------|--------------|--------------|---------|
| 1        | 9.218         | MM   | 0.4202      | 1635.21936   | 64.85749     | 91.2086 |
| 2        | 11.273        | MM   | 0.4718      | 157.61609    | 5.56835      | 8.7914  |
| Totals : |               |      |             | 1792.83545   | 70.42584     |         |

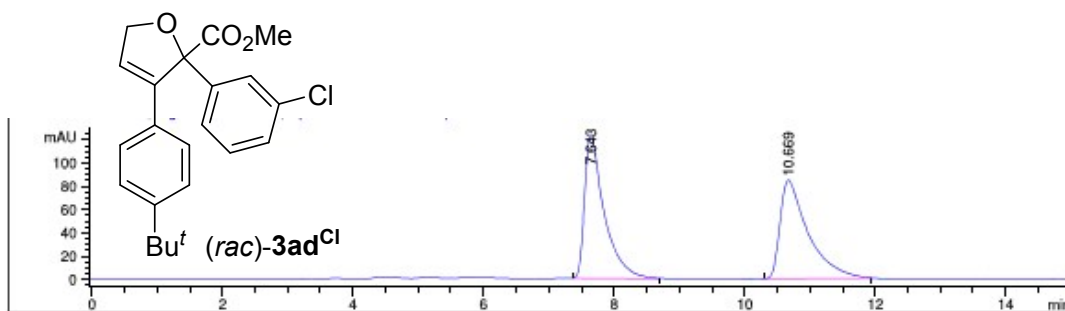

| Peak # | RetTime [min] | Type | Width [min] | Area [mAU*s] | Height [mAU] | Area %  |
|--------|---------------|------|-------------|--------------|--------------|---------|
| 1      | 7.643         | BB   | 0.2991      | 2551.74487   | 122.46594    | 50.2172 |
| 2      | 10.669        | BB   | 0.4253      | 2529.67334   | 84.49617     | 49.7828 |

Totals : 5081.41821 206.96211

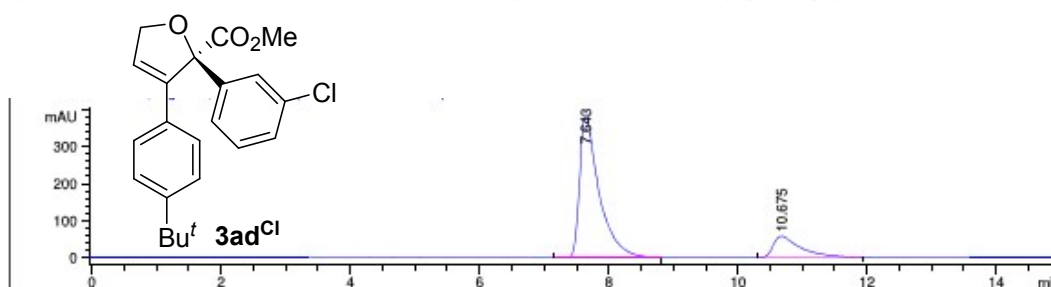

| Peak # | RetTime [min] | Type | Width [min] | Area [mAU*s] | Height [mAU] | Area %  |
|--------|---------------|------|-------------|--------------|--------------|---------|
| 1      | 7.643         | BB   | 0.3004      | 8040.16211   | 383.85760    | 82.3718 |
| 2      | 10.675        | BB   | 0.4238      | 1720.65759   | 57.71673     | 17.6282 |

Totals : 9760.81970 441.57434

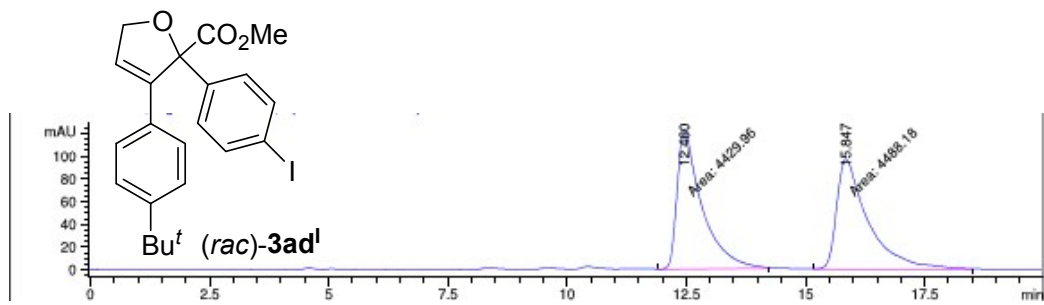

| Peak # | RetTime [min] | Type | Width [min] | Area [mAU*s] | Height [mAU] | Area %  |
|--------|---------------|------|-------------|--------------|--------------|---------|
| 1      | 12.460        | MM   | 0.6032      | 4429.96094   | 122.40429    | 49.6736 |
| 2      | 15.847        | MM   | 0.7723      | 4488.18213   | 96.85162     | 50.3264 |

Totals : 8918.14307 219.25591

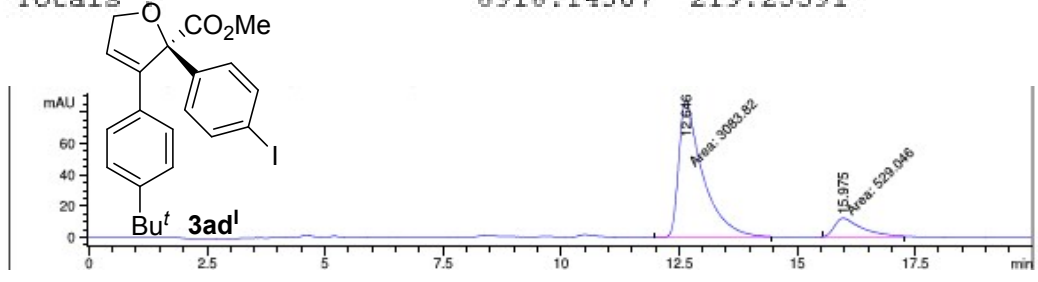

| Peak # | RetTime [min] | Type | Width [min] | Area [mAU*s] | Height [mAU] | Area %  |
|--------|---------------|------|-------------|--------------|--------------|---------|
| 1      | 12.646        | MM   | 0.5907      | 3083.81763   | 87.01206     | 85.3566 |
| 2      | 15.975        | MM   | 0.7161      | 529.04559    | 12.31371     | 14.6434 |

Totals : 3612.86322 99.32577

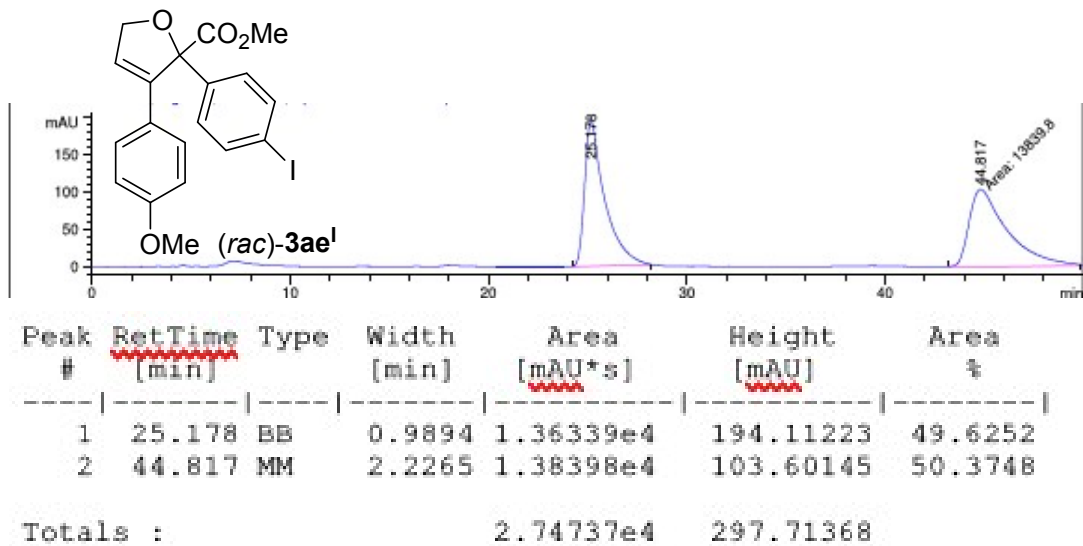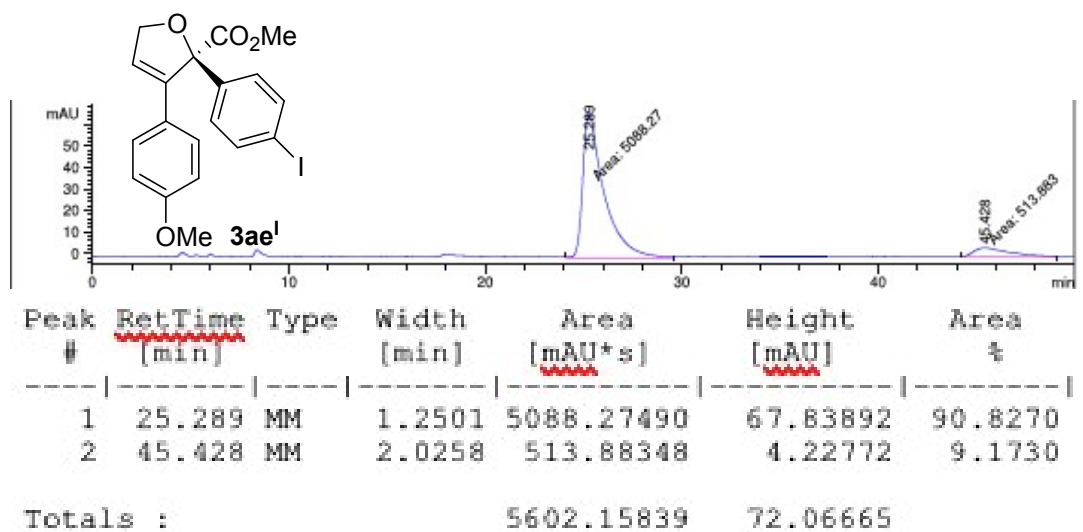

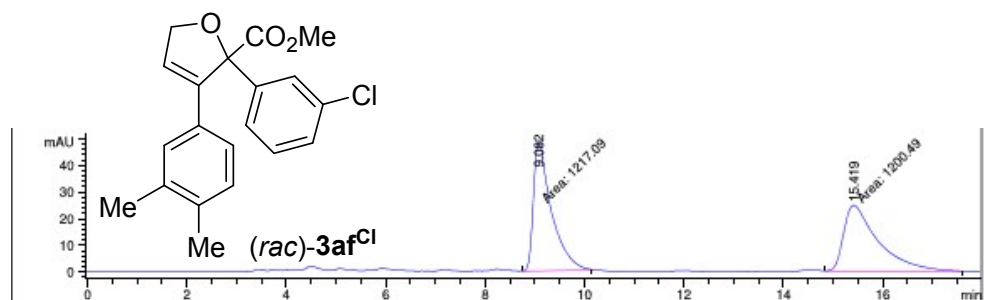

| Peak # | RetTime [min] | Type | Width [min] | Area [mAU*s] | Height [mAU] | Area %  |
|--------|---------------|------|-------------|--------------|--------------|---------|
| 1      | 9.082         | MM   | 0.4156      | 1217.08984   | 48.80845     | 50.3434 |
| 2      | 15.419        | MM   | 0.8108      | 1200.48608   | 24.67659     | 49.6566 |

Totals : 2417.57593 73.48504

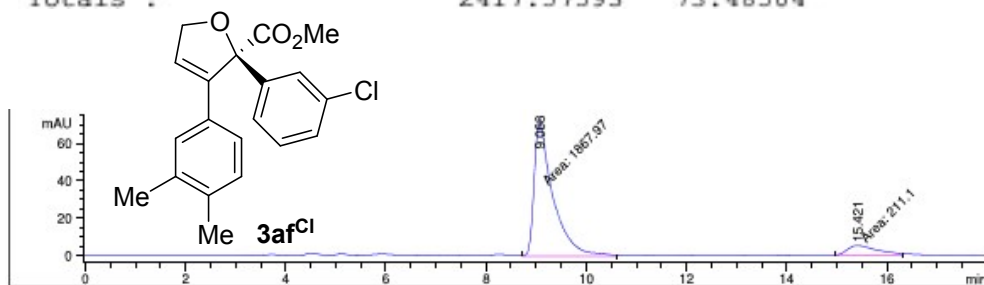

| Peak # | RetTime [min] | Type | Width [min] | Area [mAU*s] | Height [mAU] | Area %  |
|--------|---------------|------|-------------|--------------|--------------|---------|
| 1      | 9.068         | MM   | 0.4346      | 1867.97070   | 71.63638     | 89.8464 |
| 2      | 15.421        | MM   | 0.6821      | 211.09995    | 5.15815      | 10.1536 |

Totals : 2079.07065 76.79452

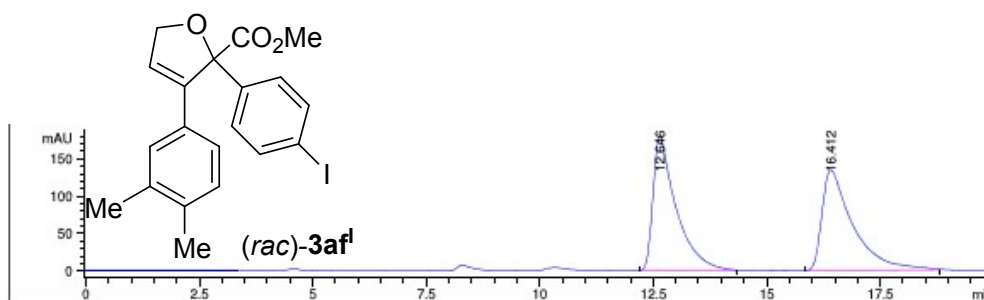

| Peak # | RetTime [min] | Type | Width [min] | Area [mAU*s] | Height [mAU] | Area %  |
|--------|---------------|------|-------------|--------------|--------------|---------|
| 1      | 12.646        | BB   | 0.4984      | 6383.18555   | 178.84732    | 50.1696 |
| 2      | 16.412        | BB   | 0.6725      | 6340.02002   | 134.37009    | 49.8304 |

Totals : 1.27232e4 313.21741

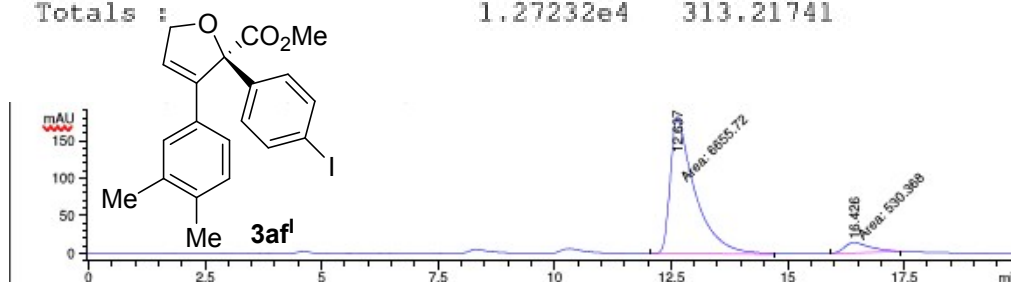

| Peak # | RetTime [min] | Type | Width [min] | Area [mAU*s] | Height [mAU] | Area %  |
|--------|---------------|------|-------------|--------------|--------------|---------|
| 1      | 12.637        | MM   | 0.6109      | 6655.72314   | 181.58607    | 92.6195 |
| 2      | 16.426        | MM   | 0.6477      | 530.36755    | 13.64783     | 7.3805  |

Totals : 7186.09070 195.23391



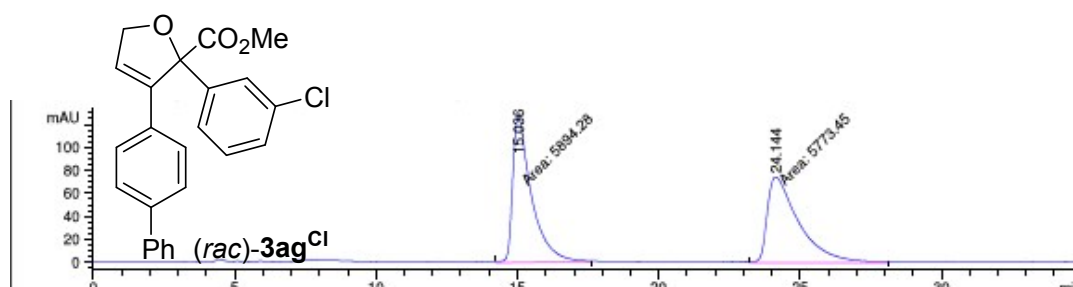

| Peak # | RetTime [min] | Type | Width [min] | Area [mAU*s] | Height [mAU] | Area %  |
|--------|---------------|------|-------------|--------------|--------------|---------|
| 1      | 15.036        | MM   | 0.7702      | 5894.27783   | 127.54149    | 50.5178 |
| 2      | 24.144        | MM   | 1.2912      | 5773.44873   | 74.52562     | 49.4822 |

Totals : 1.16677e4 202.06711

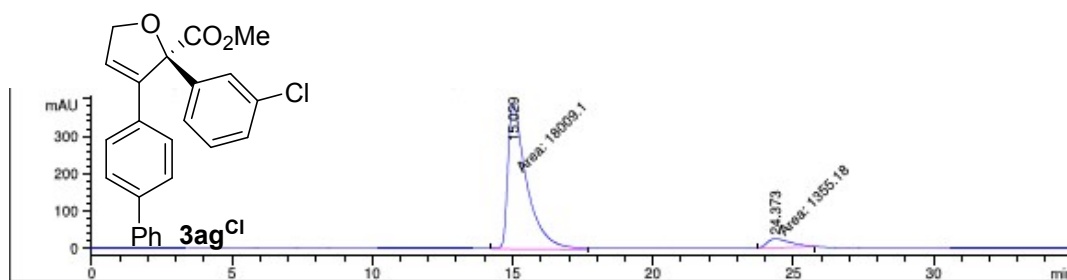

| Peak # | RetTime [min] | Type | Width [min] | Area [mAU*s] | Height [mAU] | Area %  |
|--------|---------------|------|-------------|--------------|--------------|---------|
| 1      | 15.029        | MM   | 0.7749      | 1.80091e4    | 387.34140    | 93.0017 |
| 2      | 24.373        | MM   | 0.9484      | 1355.17798   | 23.81606     | 6.9983  |

Totals : 1.93643e4 411.15746

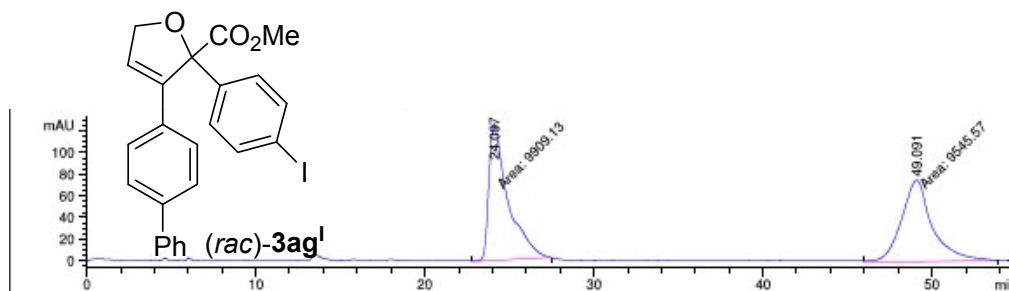

| Peak # | RetTime [min] | Type | Width [min] | Area [mAU*s] | Height [mAU] | Area %  |
|--------|---------------|------|-------------|--------------|--------------|---------|
| 1      | 24.097        | MM   | 1.3060      | 9909.12500   | 126.45602    | 50.9344 |
| 2      | 49.091        | MM   | 2.1107      | 9545.57227   | 75.37350     | 49.0656 |

Totals : 1.94547e4 201.82952

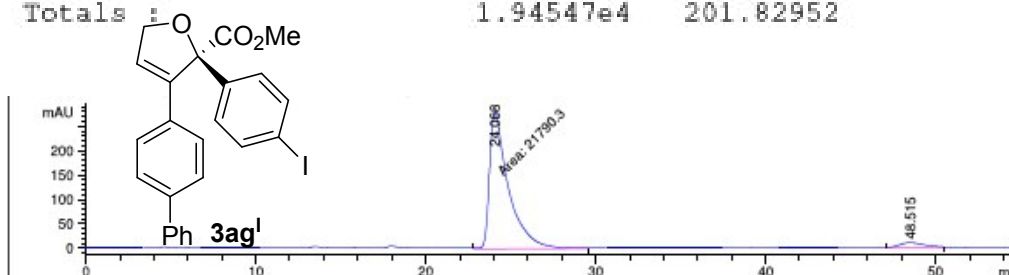

| Peak # | RetTime [min] | Type | Width [min] | Area [mAU*s] | Height [mAU] | Area %  |
|--------|---------------|------|-------------|--------------|--------------|---------|
| 1      | 24.068        | MM   | 1.2836      | 2.17903e4    | 282.92865    | 95.7695 |
| 2      | 48.515        | BB   | 1.1549      | 962.55469    | 9.84308      | 4.2305  |

Totals : 2.27528e4 292.77173

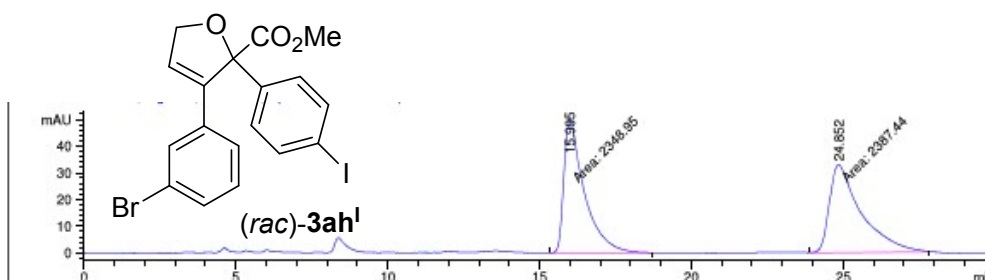

| Peak #   | RetTime [min] | Type | Width [min] | Area [mAU*s] | Height [mAU] | Area %  |
|----------|---------------|------|-------------|--------------|--------------|---------|
| 1        | 15.995        | MM   | 0.7781      | 2348.95410   | 50.31637     | 49.5937 |
| 2        | 24.852        | MM   | 1.2123      | 2387.44092   | 32.82201     | 50.4063 |
| Totals : |               |      |             | 4736.39502   | 83.13837     |         |

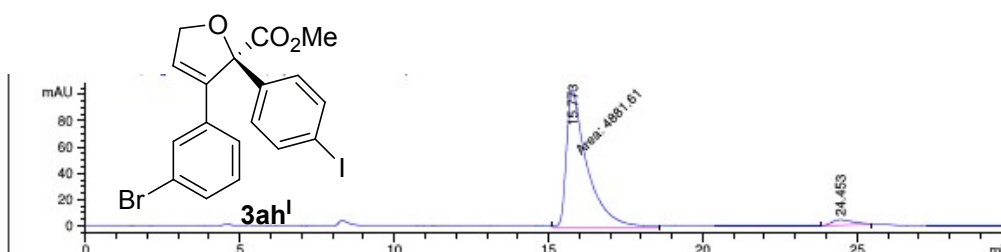

| Peak #   | RetTime [min] | Type | Width [min] | Area [mAU*s] | Height [mAU] | Area %  |
|----------|---------------|------|-------------|--------------|--------------|---------|
| 1        | 15.773        | MM   | 0.7797      | 4881.60596   | 104.35300    | 96.2496 |
| 2        | 24.453        | BB   | 0.5645      | 190.21117    | 4.03127      | 3.7504  |
| Totals : |               |      |             | 5071.81712   | 108.38427    |         |

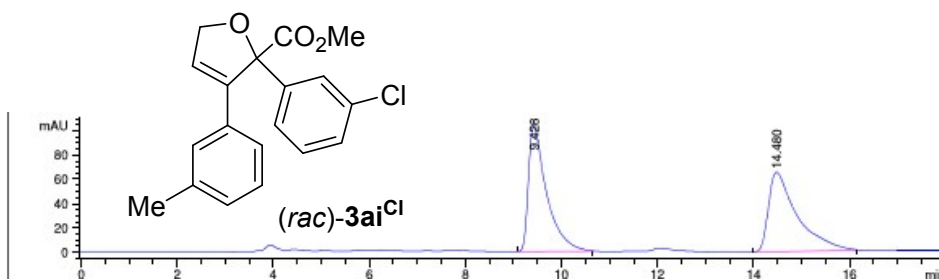

| Peak # | RetTime [min] | Type | Width [min] | Area [mAU*s] | Height [mAU] | Area %  |
|--------|---------------|------|-------------|--------------|--------------|---------|
| 1      | 9.428         | BB   | 0.3709      | 2713.41406   | 104.52685    | 50.2210 |
| 2      | 14.480        | PB   | 0.5800      | 2689.52881   | 65.09391     | 49.7790 |

Totals : 5402.94287 169.62076

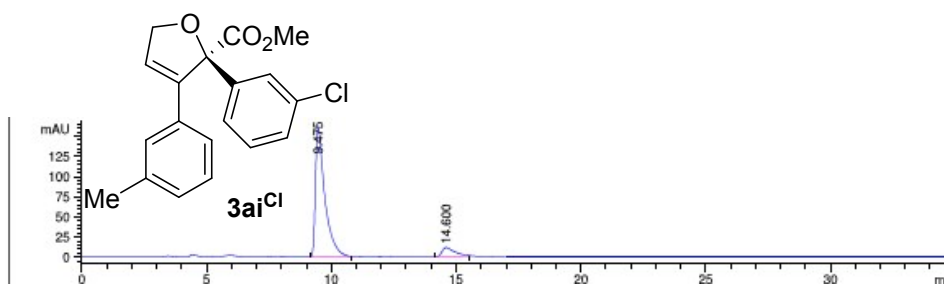

| Peak # | RetTime [min] | Type | Width [min] | Area [mAU*s] | Height [mAU] | Area %  |
|--------|---------------|------|-------------|--------------|--------------|---------|
| 1      | 9.475         | BB   | 0.3752      | 4184.53906   | 159.97960    | 91.4640 |
| 2      | 14.600        | PB   | 0.4895      | 390.52911    | 11.23664     | 8.5360  |

Totals : 4575.06818 171.21624

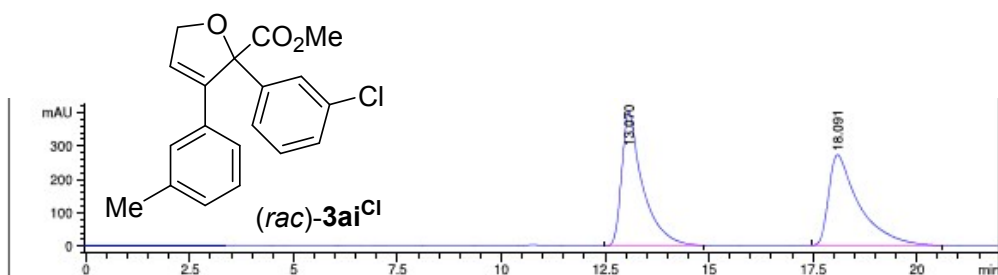

| Peak # | RetTime [min] | Type | Width [min] | Area [mAU*s] | Height [mAU] | Area %  |
|--------|---------------|------|-------------|--------------|--------------|---------|
| 1      | 13.070        | BB   | 0.5021      | 1.41542e4    | 404.59039    | 50.1517 |
| 2      | 18.091        | BB   | 0.7222      | 1.40686e4    | 273.48682    | 49.8483 |

Totals : 2.82229e4 678.07721

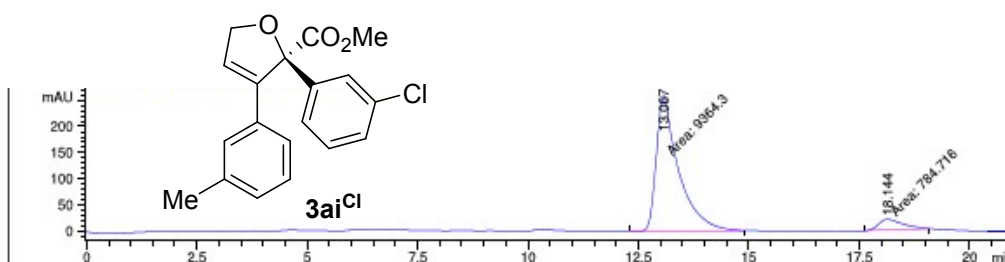

| Peak # | RetTime [min] | Type | Width [min] | Area [mAU*s] | Height [mAU] | Area %  |
|--------|---------------|------|-------------|--------------|--------------|---------|
| 1      | 13.067        | MM   | 0.5983      | 9364.30176   | 260.85406    | 92.2681 |
| 2      | 18.144        | MM   | 0.6452      | 784.71606    | 20.27131     | 7.7319  |

Totals : 1.01490e4 281.12537

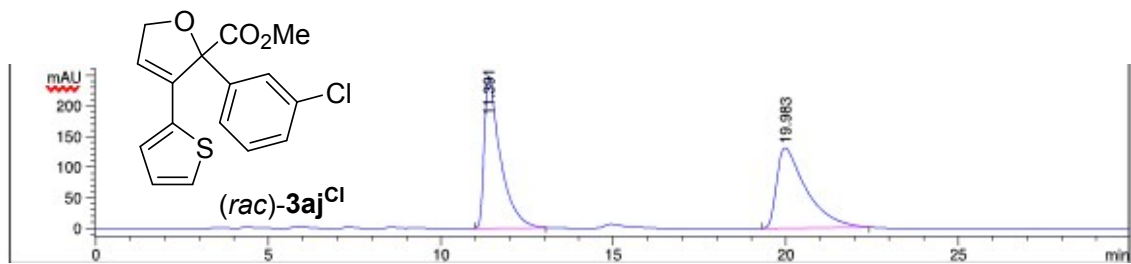

| Peak # | RetTime [min] | Type | Width [min] | Area [mAU*s] | Height [mAU] | Area %  |
|--------|---------------|------|-------------|--------------|--------------|---------|
| 1      | 11.391        | BB   | 0.4637      | 8058.70264   | 248.91983    | 50.6684 |
| 2      | 19.983        | BB   | 0.8588      | 7846.08789   | 130.99600    | 49.3316 |

Totals : 1.59048e4 379.91583

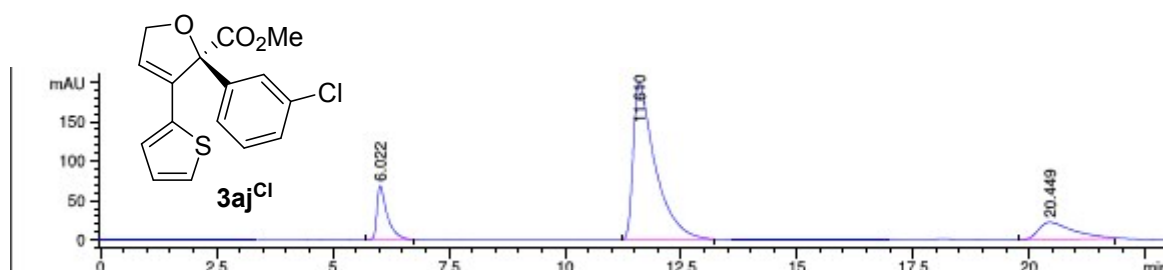

| Peak # | RetTime [min] | Type | Width [min] | Area [mAU*s] | Height [mAU] | Area %  |
|--------|---------------|------|-------------|--------------|--------------|---------|
| 1      | 6.022         | MM   | 0.5550      | 5180.91992   | 155.58571    | 85.7233 |
| 2      | 11.610        | MM   | 0.8385      | 862.84869    | 17.14973     | 14.2767 |

Totals : 6043.76862 172.73544

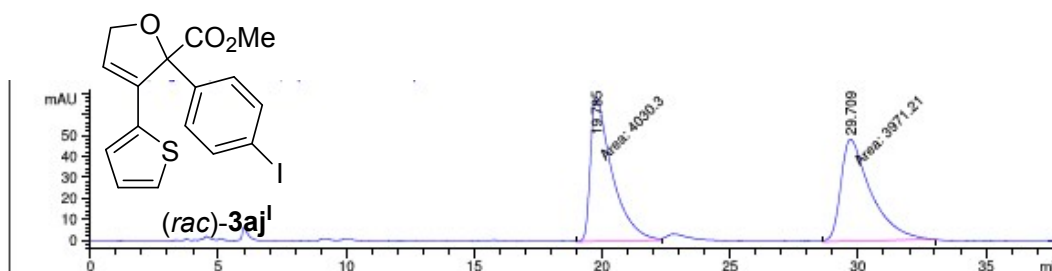

| Peak # | RetTime [min] | Type | Width [min] | Area [mAU*s] | Height [mAU] | Area %  |
|--------|---------------|------|-------------|--------------|--------------|---------|
| 1      | 19.785        | MM   | 0.9806      | 4030.30469   | 68.50259     | 50.3693 |
| 2      | 29.709        | MM   | 1.3622      | 3971.20532   | 48.58732     | 49.6307 |

Totals : 8001.51001 117.08990

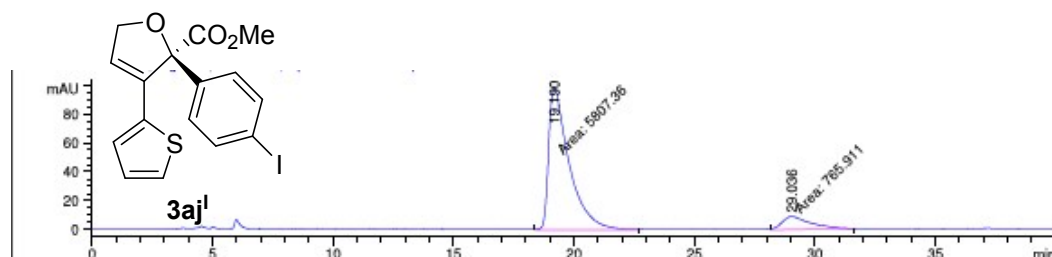

| Peak # | RetTime [min] | Type | Width [min] | Area [mAU*s] | Height [mAU] | Area %  |
|--------|---------------|------|-------------|--------------|--------------|---------|
| 1      | 19.190        | MM   | 0.9831      | 5807.36328   | 98.44942     | 88.3481 |
| 2      | 29.036        | MM   | 1.4229      | 765.91125    | 8.97093      | 11.6519 |

Totals : 6573.27454 107.42036

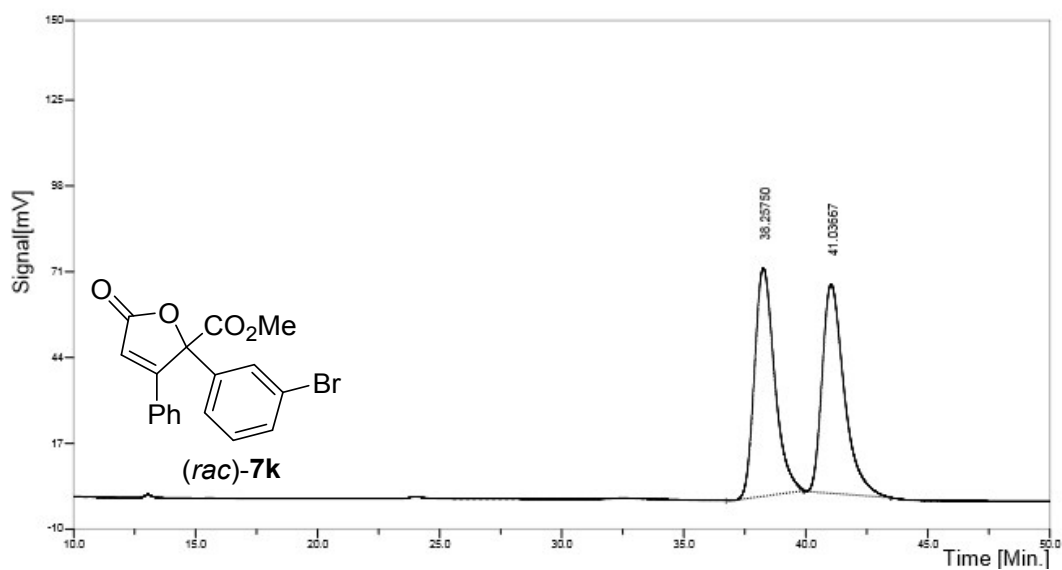

| Peak NO. | Retention time (min) | Peak area (mV.sec) | Percentage of area (%) |
|----------|----------------------|--------------------|------------------------|
| 1        | 38.25750             | 4044.27            | 50.0411                |
| 2        | 41.03667             | 4037.63            | 49.9589                |
| total    |                      | 8081.90            | 100                    |

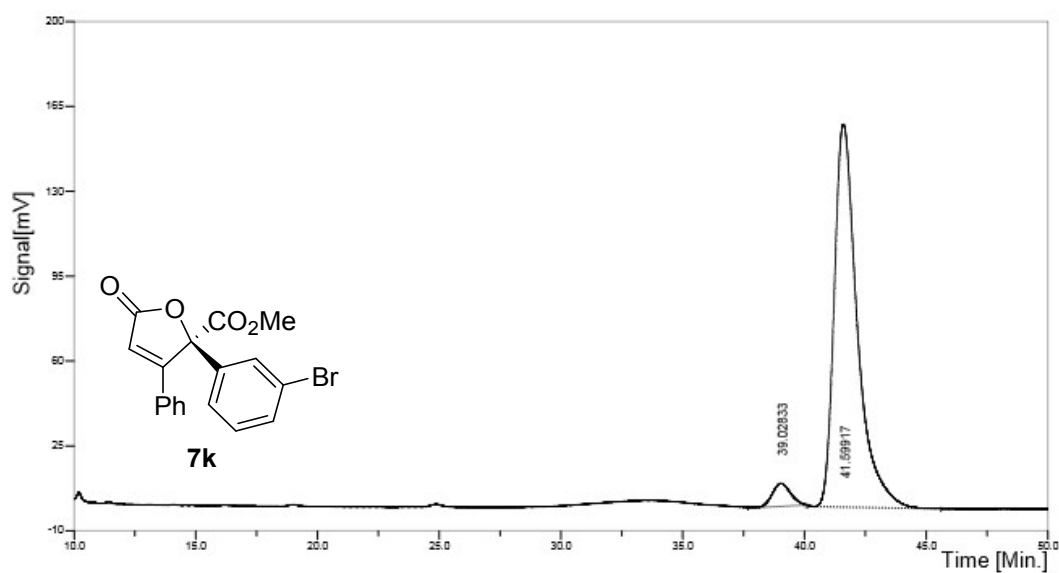

| Peak NO. | Retention time (min) | Peak area (mV.sec) | Percentage of area (%) |
|----------|----------------------|--------------------|------------------------|
| 1        | 39.02833             | 468.68             | 4.3928                 |
| 2        | 41.59917             | 10200.67           | 95.6072                |
| total    |                      | 10669.35           | 100                    |



## J. Structural determination by X-ray

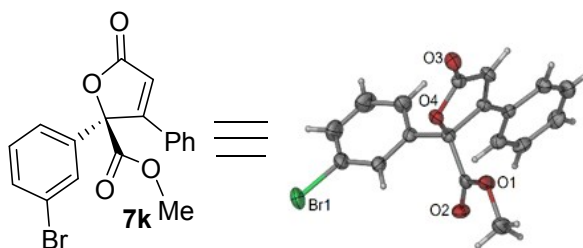

**Figure S5** X-ray diffraction parameters and data for 7k (CCDC: 1432486).

|                        |                                            |                                  |               |
|------------------------|--------------------------------------------|----------------------------------|---------------|
| Bond precision:        | C-C = 0.0042 Å                             | Wavelength=0.71073               |               |
| Cell:                  | a=8.8995 (4)                               | b=12.8103 (6)                    | c=13.9893 (6) |
|                        | alpha=90                                   | beta=90                          | gamma=90      |
| Temperature:           | 173 K                                      |                                  |               |
|                        | Calculated                                 | Reported                         |               |
| Volume                 | 1594.85 (12)                               | 1594.85 (12)                     |               |
| Space group            | P 21 21 21                                 | P2 (1) 2 (1) 2 (1)               |               |
| Hall group             | P 2ac 2ab                                  | ?                                |               |
| Moiety formula         | C18 H13 Br O4                              | ?                                |               |
| Sum formula            | C18 H13 Br O4                              | C18 H13 Br O4                    |               |
| Mr                     | 373.18                                     | 373.19                           |               |
| Dx, g cm <sup>-3</sup> | 1.554                                      | 1.554                            |               |
| Z                      | 4                                          | 4                                |               |
| Mu (mm <sup>-1</sup> ) | 2.595                                      | 2.595                            |               |
| F000                   | 752.0                                      | 752.0                            |               |
| F000'                  | 751.22                                     |                                  |               |
| h, k, lmax             | 10, 15, 16                                 | 10, 15, 16                       |               |
| Nref                   | 2811 [ 1627]                               | 2801                             |               |
| Tmin, Tmax             | 0.409, 0.509                               | 0.455, 0.552                     |               |
| Tmin'                  | 0.378                                      |                                  |               |
| Correction method=     | # Reported T Limits: Tmin=0.455 Tmax=0.552 |                                  |               |
| AbsCorr =              | MULTI-SCAN                                 |                                  |               |
| Data completeness=     | 1.72/1.00                                  | Theta (max)= 25.010              |               |
| R(reflections)=        | 0.0297 ( 2486)                             | wR2(reflections)= 0.0679 ( 2801) |               |
| S =                    | 1.058                                      | Npar= 208                        |               |
